# Supplementary material for: Transcriptomic Analysis of the Response of the Toxic Dinoflagellate Prorocentrum lima to Phosphorous Limitation
Source: MDPI journal article supplement (doi:10.3390/microorganisms11092216), 2023-08-31
Supplement: s1 [file s1]

**Table S2.** RT-qPCR validations of differentially expressed genes in in *P. lima* under 1/16 P-limited condition.

| Genes        | qPCR                 |                      | RNA-Seq                             |                                     |
|--------------|----------------------|----------------------|-------------------------------------|-------------------------------------|
|              | Forward(5'–3')       | Reverse (5'–3')      | log2 (fold change)<br>(1/16P vs 1P) | log2 (fold change)<br>(1/16P vs 1P) |
| <i>PsbA</i>  | GCCTGTTGCTGGGTCAATTC | GCAACAGGAGCTGAAAAGGC | -2.05                               | -2.94                               |
| <i>PsbC</i>  | TGGGCAGGGTCAATGTGTTT | CACCTCCTGAAGATACGCCC | -0.94                               | -3.30                               |
| <i>PetD</i>  | GCGAGCCTTCAGGTATTGGT | AAGAGAGCAACCTCCAAGCC | -3.18                               | -3.59                               |
| <i>MCAT</i>  | GCTACCCCAGACCTTTGCAT | CGTGCAAGCGATGATCAAGG | 0.56                                | 1.16                                |
| <i>ABCB1</i> | TTCTTCGCTATCCTGGGGGA | CAAGATTGGCGATGCGGAAG | 1.24                                | 1.81                                |
