# Supplementary material for: Transcriptomic Analysis of the Response of the Toxic Dinoflagellate Prorocentrum lima to Phosphorous Limitation
Source: MDPI journal article supplement (doi:10.3390/microorganisms11092216), 2023-08-31
Supplement: s1 [file s1]

# Transcriptomic Analysis of the Response of the Toxic Dinoflagellate *Prorocentrum lima* to Phosphorous Limitation

Xiukun Wan, Ge Yao, Kang Wang, Yanli Liu, Fuli Wang and Hui Jiang \*

State Key Laboratory of NBC Protection for Civilian, Beijing 102205, China;  
xiukunwan@126.com (X.W.); bzyaoge@163.com (G.Y.); yiyongjun1949@163.com  
(K.W.); liuh306@hotmail.com (Y.L.); wangfuli5728@163.com (F.W.)

\* Correspondence: jiangtide01@sina.cn

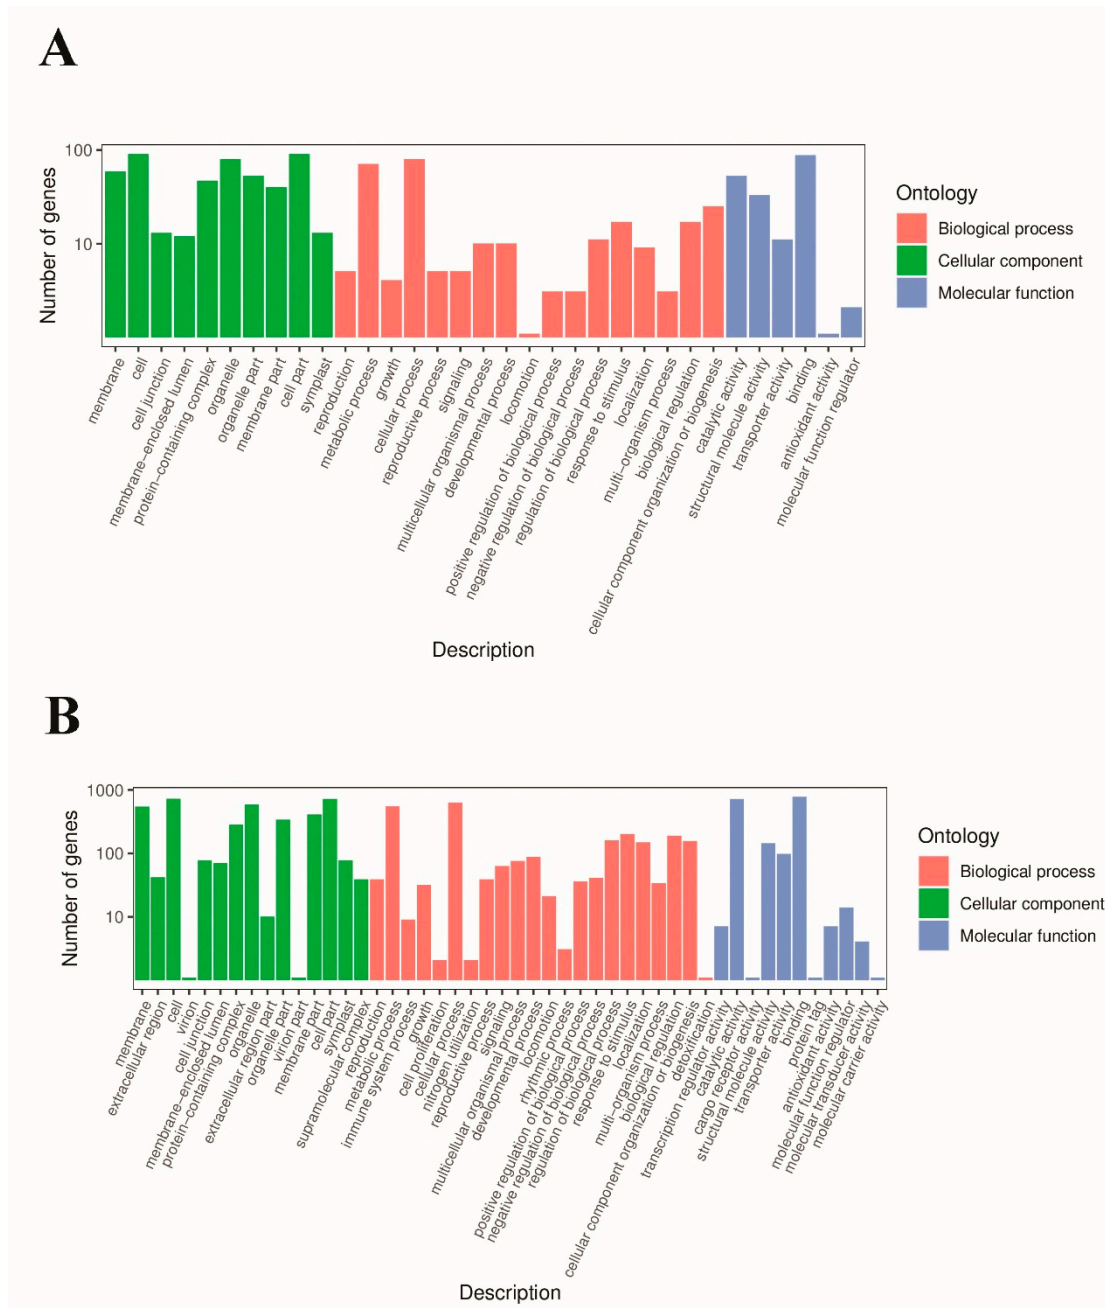

**Figure. S1.** Differential expression analysis using Gene Ontology (GO) clustering in *Prorocentrum lima* under different P conditions. (A) Statistics of GO enrichment between 1/4 P-limited and P-replete conditions. (B) Statistics of GO enrichment between 1/16 P-limited and P-replete conditions. The horizontal axis represents the multiple biological processes of differentially expressed genes, while the vertical axis represents the number of genes involved in the biological processes.

**Table. S1.** Descriptions of the differentially expressed genes in *P. lima* under different P conditions with function annotations from KEGG, NR, Swiss-Prot, Tremble, KOG, GO, and Pfam database.

**Table. S2.** RT-qPCR validations of differentially expressed genes in *P. lima* under 1/16 P-limited condition.
