# Supplementary material for: Transcriptomic Analysis of the Response of the Toxic Dinoflagellate Prorocentrum lima to Phosphorous Limitation
Source: Microorganisms. 2023 Aug 31;11(9):2216. doi: 10.3390/microorganisms11092216 (PMC10535992; doi:10.3390/microorganisms11092216)
Supplement: Supplementary file 1 [file microorganisms-11-02216-s001.zip › Table S1.xlsx]

## Sheet: 1_4P vs 1P
ID	1P-1_fpkm	1P-2_fpkm	1P-3_fpkm	1/4P-1_fpkm	1/4P-2_fpkm	1/4P-3_fpkm	1P-1_count	1P-2_count	1P-3_count	1/4P-1_count	1/4P-2_count	1/4P-3_count	log2FoldChange	pvalue	padj	length	KEGG	Nr	Swissprot	TrEMBL	KOG	GO	Pfam	TF-Family	TF-Category	TF-Classification
Cluster-1527.15706	0	0	0	4.03	1.5	1	0.01	0	0.01	263.17	89.79	68.45	9.52151	5.74601e-13	1.03232e-08	1994	K16911 ATP-dependent RNA helicase DDX21 [EC:3.6.4.13] | (RefSeq) ATP-dependent RNA helicase (A)	DEAD box RNA helicase CiRH9, partial [Chlamydomonas sp. ICE-L]	RH7_ORYSJ RecName: Full=DEAD-box ATP-dependent RNA helicase 7; EC=3.6.4.13;	A0A1Q9DJX1_SYMMI SubName: Full=DEAD-box ATP-dependent RNA helicase 7 {ECO:0000313|EMBL:OLP95466.1};	ATP-dependent RNA helicase	GO:0005737,cytoplasm; GO:0005730,nucleolus; GO:0005524,ATP binding; GO:0004004,ATP-dependent RNA helicase activity; GO:0003723,RNA binding; GO:0010501,RNA secondary structure unwinding; GO:0000166,nucleotide binding; GO:0003674,molecular_function; GO:0005488,binding; GO:0008144,drug binding; GO:0017076,purine nucleotide binding; GO:0030554,adenyl nucleotide binding; GO:0032553,ribonucleotide bind…	Neisseria meningitidis TspB protein	--	--	--
Cluster-1527.39945	0	0	0	3.78	0.24	1.37	0	0	0	246.99	14.3	94.1	9.2473	2.2015e-06	0.00242829	1998	--	--	--	A0A1Q9DEI0_SYMMI SubName: Full=Pyrimidine-specific ribonucleoside hydrolase RihB {ECO:0000313|EMBL:OLP93616.1};	--	GO:0016787,hydrolase activity; GO:0003674,molecular_function; GO:0003824,catalytic activity	Reovirus sigma C capsid protein	--	--	--
Cluster-1527.16927	0	0	0	3.53	1.34	1.22	0	0	0	185.94	64.38	67.59	9.11962	3.25667e-12	3.1568e-08	1654	K09588 cytochrome P450 family 90 subfamily A1 [EC:1.14.-.-] | (RefSeq) cytochrome P450 90A4 (A)	cytochrome P450 90A4 [Zea mays]	C90A4_ORYSJ RecName: Full=Cytochrome P450 90A4 {ECO:0000305}; EC=1.14.99.- {ECO:0000305}; AltName: Full=Protein CONSTITUTIVE PHOTOMORPHOGENESIS AND DWARFISM 2 {ECO:0000303|Ref.7}; Short=OsCPD2 {ECO:0000303|Ref.7}; AltName: Full=Steroid 23-alpha-hydroxylase {ECO:0000305};	A0A1Q9EHZ0_SYMMI SubName: Full=Cytochrome P450 85A {ECO:0000313|EMBL:OLQ07063.1};	Cytochrome P450 CYP4/CYP19/CYP26 subfamilies	GO:0016021,integral component of membrane; GO:0005886,plasma membrane; GO:0080132,fatty acid alpha-hydroxylase activity; GO:0020037,heme binding; GO:0005506,iron ion binding; GO:0004497,monooxygenase activity; GO:0016705,oxidoreductase activity, acting on paired donors, with incorporation or reduction of molecular oxygen; GO:0016132,brassinosteroid biosynthetic process; GO:0010268,brassinosteroid…	Cytochrome P450	--	--	--
Cluster-1527.16122	3.47	3.11	0	0	0	0	106.27	95.71	0	0	0	0	-8.59077	0.0279324	0.559777	1120	--	--	--	A0A1Q9CRX8_SYMMI SubName: Full=Uncharacterized protein {ECO:0000313|EMBL:OLP85670.1};	--	--	--	--	--	--
Cluster-1527.13910	0	0	0	0.96	1.1	0.83	0	0	0	100.61	105.71	92.02	9.0705	2.70998e-13	7.88063e-09	3074	K13242 nitric-oxide synthase, endothelial [EC:1.14.13.39] | (RefSeq) Flavoprotein pyridine nucleotide cytochrome reductase (A)	nitric oxide synthase [Klebsormidium nitens]	NDOR1_ARATH RecName: Full=NADPH-dependent diflavin oxidoreductase 1 {ECO:0000255|HAMAP-Rule:MF_03178}; EC=1.18.1.- {ECO:0000255|HAMAP-Rule:MF_03178}; AltName: Full=NADPH-dependent FMN and FAD-containing oxidoreductase {ECO:0000255|HAMAP-Rule:MF_03178};	A0A1W0A0D7_9STRA SubName: Full=Uncharacterized protein {ECO:0000313|EMBL:OQS03651.1};	NADP/FAD dependent oxidoreductase	GO:0005737,cytoplasm; GO:0005634,nucleus; GO:0010181,FMN binding; GO:0003958,NADPH-hemoprotein reductase activity; GO:0016651,oxidoreductase activity, acting on NAD(P)H; GO:0009793,embryo development ending in seed dormancy; GO:0000166,nucleotide binding; GO:0003674,molecular_function; GO:0005488,binding; GO:0032553,ribonucleotide binding; GO:0036094,small molecule binding; GO:0043167,ion binding…	Nitric oxide synthase, oxygenase domain	--	--	--
Cluster-1527.42731	0.01	0	0	3.97	1.7	0.52	0.27	0	0	182.97	71.69	25.41	8.93507	1.90728e-10	9.24394e-07	1476	--	--	--	--	--	--	--	--	--	--
Cluster-1527.68885	1.55	0	1.91	0	0	0	64.67	0	89.41	0	0	0	-8.09606	0.0383241	0.605807	1442	--	--	--	--	--	--	--	--	--	--
Cluster-1527.49956	0.19	0.23	0	0	0	0	49.31	61.87	0	0	0	0	-7.72767	0.0480579	0.638139	7958	K02359 beta-1,4-mannosyltransferase [EC:2.4.1.-] | (RefSeq) hypothetical protein (A)	antibiotic synthetase, putative [Ricinus communis]	AEE19_ARATH RecName: Full=Putative acyl-activating enzyme 19;	L1JDN1_GUITH SubName: Full=Uncharacterized protein {ECO:0000313|EMBL:EKX46220.1, ECO:0000313|EnsemblProtists:EKX46220}; Flags: Fragment;	--	GO:0003824,catalytic activity; GO:0008152,metabolic process; GO:0003674,molecular_function; GO:0008150,biological_process	AMP-binding enzyme	--	--	--
Cluster-1527.75010	0.18	0	0.18	0	0	0	54.42	0	61.68	0	0.01	0.01	-7.69497	0.0490146	0.640985	8937	K22128 piezo-type mechanosensitive ion channel component 1/2 | (RefSeq) piezo-type mechanosensitive ion channel homolog (A)	piezo-type mechanosensitive ion channel homolog [Momordica charantia]	PIEZO_ARATH RecName: Full=Piezo-type mechanosensitive ion channel homolog;	A0A1Q9EJZ6_SYMMI SubName: Full=Piezo-type mechanosensitive ion channel component 2 {ECO:0000313|EMBL:OLQ07774.1};	Uncharacterized conserved protein	GO:0016021,integral component of membrane; GO:0016020,membrane; GO:0005261,cation channel activity; GO:0008381,mechanosensitive ion channel activity; GO:0071260,cellular response to mechanical stimulus; GO:0050982,detection of mechanical stimulus; GO:0042391,regulation of membrane potential; GO:0003674,molecular_function; GO:0005215,transporter activity; GO:0005216,ion channel activity; GO:002285…	Piezo non-specific cation channel, R-Ras-binding domain	--	--	--
Cluster-1527.22762	0	0	0	1.39	0.98	0.63	0	0	0	90.83	58.6	43.27	8.42177	8.47992e-11	4.93192e-07	1998	--	--	--	A0A1Q9DEI0_SYMMI SubName: Full=Pyrimidine-specific ribonucleoside hydrolase RihB {ECO:0000313|EMBL:OLP93616.1};	--	GO:0016787,hydrolase activity; GO:0003674,molecular_function; GO:0003824,catalytic activity	Reovirus sigma C capsid protein	--	--	--
Cluster-1527.15525	1.25	0	1.1	0	0	0	42.22	0	41.6	0	0	0	-7.23541	0.0642436	0.690791	1210	--	--	--	--	--	--	Apolipoprotein A1/A4/E domain	--	--	--
Cluster-1527.61196	1.48	1.77	0	0.06	0	0	91.15	110.11	0	3.69	0	0	-5.81898	0.0613598	0.68261	2026	K16289 ankyrin repeat and protein kinase domain-containing protein 1 [EC:2.7.11.1] | (RefSeq) serine/threonine protein kinase (A)	serine/threonine-protein kinase STY46 [Jatropha curcas]	EDR1_ARATH RecName: Full=Serine/threonine-protein kinase EDR1; EC=2.7.11.1; AltName: Full=MAPKK kinase EDR1; AltName: Full=Protein ENHANCED DISEASE RESISTANCE 1; Short=AtEDR1; AltName: Full=Serine/threonine/tyrosine-protein kinase 10;	A0A1Q9DKQ9_SYMMI RecName: Full=Alpha-galactosidase {ECO:0000256|RuleBase:RU361168}; EC=3.2.1.22 {ECO:0000256|RuleBase:RU361168}; AltName: Full=Melibiase {ECO:0000256|RuleBase:RU361168};	Tyrosine kinase specific for activated (GTP-bound) p21cdc42Hs	GO:0005829,cytosol; GO:0005769,early endosome; GO:0005783,endoplasmic reticulum; GO:0005768,endosome; GO:0005634,nucleus; GO:0005886,plasma membrane; GO:0005802,trans-Golgi network; GO:0012510,trans-Golgi network transport vesicle membrane; GO:0005524,ATP binding; GO:0016301,kinase activity; GO:0004709,MAP kinase kinase kinase activity; GO:0004712,protein serine/threonine/tyrosine kinase activity…	Protein kinase domain	--	--	--
Cluster-1527.69132	0	0.9	1.67	0.06	0	0	0	39.93	82.72	3.02	0	0	-5.40244	0.0645063	0.692065	1513	--	--	--	--	--	--	--	--	--	--
Cluster-1527.32386	0	0	0	2.37	1.96	2.58	0	0	0	55.86	42.35	64.19	8.17595	2.2514e-10	1.00724e-06	868	--	--	--	--	--	--	Ubiquitin family	--	--	--
Cluster-1527.37627	12.68	0	52.84	0.31	0	1.43	904.49	0	4219.8	23.91	0	115.69	-5.1401	0.0970646	0.752302	2303	--	hypothetical protein [Phaseolus vulgaris]	--	T2DPZ8_PHAVU SubName: Full=Uncharacterized protein {ECO:0000313|EMBL:AGV54793.1};	--	--	--	--	--	--
Cluster-1527.46895	11.65	10.62	0.69	0.36	0.01	0.56	241.82	221.62	16.13	8.12	0.18	13.26	-4.6206	0.00290975	0.229622	833	--	--	--	--	--	--	Zinc finger C-x8-C-x5-C-x3-H type (and similar)	C3H	TF	C3H
Cluster-1527.72335	13.69	1.84	14	0	0	1.25	525.66	71.06	603.18	0	0	54.55	-4.43524	0.0801813	0.728157	1346	K15285 solute carrier family 35, member E3 | (RefSeq) UDP-galactose transporter 1 (A)	hypothetical protein H632_c243p2 [Helicosporidium sp. ATCC 50920]	PT311_ARATH RecName: Full=Probable sugar phosphate/phosphate translocator At3g11320;	A0A1Q9CCV0_SYMMI SubName: Full=Putative sugar phosphate/phosphate translocator {ECO:0000313|EMBL:OLP80667.1};	Glucose-6-phosphate/phosphate and phosphoenolpyruvate/phosphate antiporter	GO:0005783,endoplasmic reticulum; GO:0005794,Golgi apparatus; GO:0016021,integral component of membrane; GO:0008643,carbohydrate transport; GO:0006810,transport; GO:0008150,biological_process; GO:0051179,localization; GO:0051234,establishment of localization; GO:0071702,organic substance transport; GO:0005622,intracellular; GO:0005575,cellular_component; GO:0005623,cell; GO:0005737,cytoplasm; GO:…	Triose-phosphate Transporter family	--	--	--
Cluster-1527.77403	0	0	0	0.23	0.33	0.05	0	0	0	52.46	69.64	11.22	7.91549	7.13514e-08	0.000180426	6522	--	--	--	A0A1Q9DVP5_SYMMI SubName: Full=Uncharacterized protein {ECO:0000313|EMBL:OLP99255.1};	--	--	F5/8 type C domain	--	--	--
Cluster-1527.68338	0.63	0.01	2.31	0.17	0.01	0.01	54.75	0.61	223.9	15.61	0.65	0.53	-3.97076	0.0296652	0.568725	2743	K22544 deoxynucleoside triphosphate triphosphohydrolase SAMHD1 [EC:3.1.5.-] | (RefSeq) deoxynucleoside triphosphate triphosphohydrolase SAMHD1 homolog (A)	PREDICTED: deoxynucleoside triphosphate triphosphohydrolase SAMHD1 homolog isoform X1 [Tarenaya hassleriana]	--	A0A1Q9CGN6_SYMMI SubName: Full=Deoxynucleoside triphosphate triphosphohydrolase SAMHD1 {ECO:0000313|EMBL:OLP82095.1};	Metal-dependent phosphohydrolase	GO:0016787,hydrolase activity; GO:0003674,molecular_function; GO:0003824,catalytic activity	HD domain	--	--	--
Cluster-1527.69494	0.27	0.24	0.17	0.05	0	0	58.11	53.19	40.18	10.74	0	0	-3.88067	0.000266178	0.0539405	6547	--	--	--	A0A1Q9DKC8_SYMMI SubName: Full=Uncharacterized protein {ECO:0000313|EMBL:OLP95635.1};	--	GO:0016887,ATPase activity; GO:0004842,ubiquitin-protein transferase activity; GO:0003674,molecular_function; GO:0003824,catalytic activity; GO:0017111,nucleoside-triphosphatase activity; GO:0016462,pyrophosphatase activity; GO:0016787,hydrolase activity; GO:0016817,hydrolase activity, acting on acid anhydrides; GO:0016818,hydrolase activity, acting on acid anhydrides, in phosphorus-containing an…	--	--	--	--
Cluster-1527.60023	0	0.45	1.98	0.2	0	0	0	34.76	169.31	16.21	0	0.08	-3.70183	0.293753	0.907825	2447	--	--	YSL10_ORYSJ RecName: Full=Probable metal-nicotianamine transporter YSL10; AltName: Full=Protein YELLOW STRIPE LIKE 10; Short=OsYSL10;	R1FMK9_EMIHU SubName: Full=Uncharacterized protein {ECO:0000313|EMBL:EOD34584.1, ECO:0000313|EnsemblProtists:EOD34584};	--	GO:0016021,integral component of membrane; GO:0005886,plasma membrane; GO:0022857,transmembrane transporter activity; GO:0003674,molecular_function; GO:0005215,transporter activity; GO:0005575,cellular_component; GO:0016020,membrane; GO:0031224,intrinsic component of membrane; GO:0044425,membrane part; GO:0005623,cell; GO:0044464,cell part; GO:0071944,cell periphery	OPT oligopeptide transporter protein	--	--	--
Cluster-1527.42733	1.03	0.81	2.49	0.04	0.32	0	88.5	69.61	239	3.56	26.93	0	-3.57191	0.0199513	0.50876	2718	--	--	--	--	--	--	--	--	--	--
Cluster-1527.44276	13.78	4.02	16.6	3.47	0	0	219.68	64.29	298.77	59.52	0	0	-3.3669	0.170849	0.83795	693	--	--	--	--	--	--	MORN repeat	--	--	--
Cluster-1527.43268	0.01	0	0.01	1.7	1.64	0.05	0.29	0	0.29	69.07	61.17	2.11	7.88547	2.08996e-06	0.00238337	1330	--	--	--	A0A1Q9F6F8_SYMMI SubName: Full=Uncharacterized protein {ECO:0000313|EMBL:OLQ15278.1};	--	--	--	--	--	--
Cluster-1527.62508	10.77	0	11.16	0.58	1.66	0	413.42	0.01	480.76	23.82	62.65	0	-3.2891	0.238685	0.885527	1346	K15285 solute carrier family 35, member E3 | (RefSeq) UDP-galactose transporter 1 (A)	probable sugar phosphate/phosphate translocator At3g11320 [Durio zibethinus]	PT311_ARATH RecName: Full=Probable sugar phosphate/phosphate translocator At3g11320;	A0A1Q9CCV0_SYMMI SubName: Full=Putative sugar phosphate/phosphate translocator {ECO:0000313|EMBL:OLP80667.1};	Glucose-6-phosphate/phosphate and phosphoenolpyruvate/phosphate antiporter	GO:0005783,endoplasmic reticulum; GO:0005794,Golgi apparatus; GO:0016021,integral component of membrane; GO:0008643,carbohydrate transport; GO:0006810,transport; GO:0008150,biological_process; GO:0051179,localization; GO:0051234,establishment of localization; GO:0071702,organic substance transport; GO:0005622,intracellular; GO:0005575,cellular_component; GO:0005623,cell; GO:0005737,cytoplasm; GO:…	Triose-phosphate Transporter family	--	--	--
Cluster-1527.32885	0.4	0	0.3	0.08	0	0	67.7	0	57.03	14.33	0	0	-3.25221	0.332214	0.923108	5147	--	--	--	R1CFX4_EMIHU SubName: Full=Uncharacterized protein {ECO:0000313|EMBL:EOD21377.1, ECO:0000313|EnsemblProtists:EOD21377};	--	GO:0016787,hydrolase activity; GO:0003674,molecular_function; GO:0003824,catalytic activity	--	--	--	--
Cluster-1527.42792	1.13	0.01	2.2	0	0	0.33	38.49	0.45	84.39	0	0.01	12.81	-3.18447	0.344577	0.926198	1224	--	--	--	--	--	--	--	--	--	--
Cluster-1527.8007	2.66	4.9	6.87	0	1.68	0	61.86	114.65	179.74	0	38.52	0	-3.07815	0.19065	0.854845	906	--	--	--	--	--	--	--	--	--	--
Cluster-1527.52968	5.5	0.09	8.09	1.23	0.34	0.15	277.22	4.38	457.12	66.8	16.79	8.61	-3.00479	0.0435319	0.623704	1696	K21706 acyl-lipid omega-(9-4) desaturase [EC:1.14.19.12] | (RefSeq) predicted protein (A)	predicted protein [Chlamydomonas reinhardtii]	DES_CHLRE RecName: Full=Acyl-lipid omega-13 desaturase {ECO:0000303|PubMed:16267098}; Short=CrDES {ECO:0000303|PubMed:16267098}; EC=1.14.19.12 {ECO:0000269|PubMed:16267098}; AltName: Full=Omega13 fatty acid desaturase {ECO:0000303|PubMed:16267098};	F0Y3P0_AURAN SubName: Full=Uncharacterized protein {ECO:0000313|EMBL:EGB09983.1}; Flags: Fragment;	Delta 6-fatty acid desaturase/delta-8 sphingolipid desaturase	GO:0016021,integral component of membrane; GO:0020037,heme binding; GO:0046872,metal ion binding; GO:0016717,oxidoreductase activity, acting on paired donors, with oxidation of a pair of donors resulting in the reduction of molecular oxygen to two molecules of water; GO:0043651,linoleic acid metabolic process; GO:0055114,oxidation-reduction process; GO:0006636,unsaturated fatty acid biosynthetic …	Fatty acid desaturase	--	--	--
Cluster-1527.55660	0.18	2.46	0.91	0.1	0.36	0	11.99	162.41	66.65	6.91	23.11	0	-2.98266	0.00796795	0.367999	2133	K04874 potassium voltage-gated channel Shaker-related subfamily A member 1 | (RefSeq) predicted protein (A)	predicted protein [Chlamydomonas reinhardtii]	--	A0A1Q9C601_SYMMI SubName: Full=Potassium voltage-gated channel subfamily B member 2 {ECO:0000313|EMBL:OLP78325.1};	Voltage-gated A-type K+ channel KCND	GO:0008076,voltage-gated potassium channel complex; GO:0005509,calcium ion binding; GO:0005249,voltage-gated potassium channel activity; GO:0003674,molecular_function; GO:0005488,binding; GO:0046872,metal ion binding; GO:0043167,ion binding; GO:0043169,cation binding; GO:0046873,metal ion transmembrane transporter activity; GO:0005215,transporter activity; GO:0005216,ion channel activity; GO:0005…	Ion transport protein	--	--	--
Cluster-1527.62471	13.46	10.11	30.46	0	1.51	5.61	39.7	29.4	106.21	0	4.37	19.14	-2.88268	0.00419736	0.278696	312	--	--	--	--	--	--	--	--	--	--
Cluster-1527.17748	1.28	1.04	0.51	0	0.41	0	48.53	39.62	21.73	0.02	15.3	0	-2.83743	0.0290252	0.564206	1330	--	--	--	--	--	--	--	--	--	--
Cluster-1527.84748	0.83	0.33	0.64	0	0.26	0	58	22.82	50	0	17.73	0	-2.77839	0.0333747	0.58561	2252	K13095 splicing factor 1 | (RefSeq) splicing factor-like protein 1 (A)	uncharacterized protein c30d11.14c [Quercus suber]	--	A0A1Q9DAT5_SYMMI SubName: Full=Vegetative incompatibility protein HET-E-1 {ECO:0000313|EMBL:OLP92258.1};	--	GO:0005737,cytoplasm; GO:0003723,RNA binding; GO:0003674,molecular_function; GO:0003676,nucleic acid binding; GO:0005488,binding; GO:0097159,organic cyclic compound binding; GO:1901363,heterocyclic compound binding; GO:0005622,intracellular; GO:0005575,cellular_component; GO:0005623,cell; GO:0044424,intracellular part; GO:0044464,cell part	KH domain	--	--	--
Cluster-1527.24853	0.78	1.18	5.27	0	1.05	0.01	32.95	50.27	249.89	0	43.54	0.38	-2.75771	0.273049	0.902998	1459	--	--	--	A0A1Q9CWA3_SYMMI SubName: Full=Uncharacterized protein {ECO:0000313|EMBL:OLP87187.1};	--	GO:0016021,integral component of membrane; GO:0005575,cellular_component; GO:0016020,membrane; GO:0031224,intrinsic component of membrane; GO:0044425,membrane part	Bestrophin, RFP-TM, chloride channel	--	--	--
Cluster-1527.80296	5.72	1.97	6.57	1.12	0.61	0.39	38	13	50	8	4	3	-2.75719	0.000389517	0.0680987	422	--	--	--	A0A0V0H109_SOLCH SubName: Full=Putative ovule protein {ECO:0000313|EMBL:JAP14036.1};	--	--	--	--	--	--
Cluster-1527.79631	0	1.17	0.57	0.28	0	0	0	90.9	49.42	23.45	0	0	-2.72519	0.440009	0.950465	2464	--	hypothetical protein SELMODRAFT_444450 [Selaginella moellendorffii]	--	A0A1Q9C362_SYMMI RecName: Full=Peptidylprolyl isomerase {ECO:0000256|PROSITE-ProRule:PRU00277}; EC=5.2.1.8 {ECO:0000256|PROSITE-ProRule:PRU00277};	--	GO:0003755,peptidyl-prolyl cis-trans isomerase activity; GO:0006904,vesicle docking involved in exocytosis; GO:0003674,molecular_function; GO:0003824,catalytic activity; GO:0016853,isomerase activity; GO:0016859,cis-trans isomerase activity; GO:0140096,catalytic activity, acting on a protein; GO:0016192,vesicle-mediated transport; GO:0046903,secretion; GO:0006810,transport; GO:0006887,exocytosis;…	Hint-domain	--	--	--
Cluster-1527.19487	0	0.57	0.62	0	0.18	0	0	42.38	51.07	0	12.85	0	-2.7169	0.417026	0.946284	2362	--	--	--	R1CIX8_EMIHU SubName: Full=Uncharacterized protein {ECO:0000313|EMBL:EOD22818.1, ECO:0000313|EnsemblProtists:EOD22818};	--	GO:0016021,integral component of membrane; GO:0005575,cellular_component; GO:0016020,membrane; GO:0031224,intrinsic component of membrane; GO:0044425,membrane part	--	--	--	--
Cluster-1527.59896	1.42	0.55	1.4	0	0.55	0	34.79	13.67	38.71	0	13.29	0	-2.66731	0.0460997	0.631884	942	K04648 dynactin 1 | (RefSeq) dynactin, 150 kDa isoform-like (A)	predicted protein [Hordeum vulgare subsp. vulgare]	--	F2CWE1_HORVV SubName: Full=Predicted protein {ECO:0000313|EMBL:BAJ87162.1};	Cytoskeleton-associated protein and related proteins	--	CAP-Gly domain	--	--	--
Cluster-1527.68826	0	0	0	1.23	2.34	0.02	0	0	0	46.42	80.93	0.72	7.87513	6.1314e-06	0.0047547	1253	K16285 RING/U-box domain-containing protein [EC:2.3.2.27] | (RefSeq) probable E3 ubiquitin-protein ligase XERICO (A)	43kDa postsynaptic protein [Parasponia andersonii]	RING1_ARATH RecName: Full=E3 ubiquitin-protein ligase At1g12760; EC=2.3.2.27; AltName: Full=RING finger protein At1g12760; AltName: Full=RING-type E3 ubiquitin transferase At1g12760 {ECO:0000305};	A0A1Q9F1K7_SYMMI SubName: Full=Kinesin-like protein KIFC3 {ECO:0000313|EMBL:OLQ13529.1};	FOG: Predicted E3 ubiquitin ligase	GO:0016021,integral component of membrane; GO:0046872,metal ion binding; GO:0061630,ubiquitin protein ligase activity; GO:0004842,ubiquitin-protein transferase activity; GO:0043161,proteasome-mediated ubiquitin-dependent protein catabolic process; GO:0003674,molecular_function; GO:0005488,binding; GO:0043167,ion binding; GO:0043169,cation binding; GO:0003824,catalytic activity; GO:0016740,transfe…	Ring finger domain	--	--	--
Cluster-1527.24872	0.15	0	1.12	0.2	0	0.01	30.2	0	250.74	43.32	0	1.66	-2.65487	0.350919	0.927462	6070	K00706 1,3-beta-glucan synthase [EC:2.4.1.34] | (RefSeq) 1,3-beta-glucan synthase component FKS1-like (A)	1,3-beta-glucan synthase component fks1 [Quercus suber]	CALS5_ARATH RecName: Full=Callose synthase 5; EC=2.4.1.34; AltName: Full=1,3-beta-glucan synthase; AltName: Full=Protein GLUCAN SYNTHASE-LIKE 2; AltName: Full=Protein LESS ADHERENT POLLEN 1;	A0A1Q9CRL9_SYMMI SubName: Full=1,3-beta-glucan synthase component bgs3 {ECO:0000313|EMBL:OLP85560.1};	1,3-beta-glucan synthase/callose synthase catalytic subunit	GO:0000148,1,3-beta-D-glucan synthase complex; GO:0016021,integral component of membrane; GO:0003843,1,3-beta-D-glucan synthase activity; GO:0006075,(1->3)-beta-D-glucan biosynthetic process; GO:0071555,cell wall organization; GO:0009556,microsporogenesis; GO:0009846,pollen germination; GO:0009860,pollen tube growth; GO:0010208,pollen wall assembly; GO:0008360,regulation of cell shape; GO:0080092…	RNA polymerase II elongation factor ELL	--	--	--
Cluster-1527.26610	1.55	13.62	0	2.51	0.03	0	35.8	316.77	0	62.52	0.57	0	-2.64152	0.390197	0.938994	902	K06630 14-3-3 protein epsilon | (RefSeq) 14-3-3 protein 4 (A)	CL14-3-3b [Cunninghamia lanceolata]	1433_MESCR RecName: Full=14-3-3-like protein; AltName: Full=G-box-binding factor;	A4UHC4_ALEFU SubName: Full=DNA damage checkpoint protein rad24 {ECO:0000313|EMBL:ABO47882.1};	Multifunctional chaperone (14-3-3 family)	GO:0019904,protein domain specific binding; GO:0005515,protein binding; GO:0003674,molecular_function; GO:0005488,binding	14-3-3 protein	--	--	--
Cluster-1527.10694	0.78	0.08	0.7	0.2	0.07	0	76.27	7.97	76.05	21.38	6.45	0	-2.60593	0.0193018	0.503503	3062	K13242 nitric-oxide synthase, endothelial [EC:1.14.13.39] | (RefSeq) Flavoprotein pyridine nucleotide cytochrome reductase (A)	nitric oxide synthase [Klebsormidium nitens]	NCPR1_ARATH RecName: Full=NADPH--cytochrome P450 reductase 1 {ECO:0000255|HAMAP-Rule:MF_03212}; Short=CPR 1 {ECO:0000255|HAMAP-Rule:MF_03212}; Short=P450R 1 {ECO:0000255|HAMAP-Rule:MF_03212}; EC=1.6.2.4 {ECO:0000255|HAMAP-Rule:MF_03212};	A0A1W0A0D7_9STRA SubName: Full=Uncharacterized protein {ECO:0000313|EMBL:OQS03651.1};	NADP/FAD dependent oxidoreductase	GO:0005829,cytosol; GO:0005783,endoplasmic reticulum; GO:0005789,endoplasmic reticulum membrane; GO:0016021,integral component of membrane; GO:0010181,FMN binding; GO:0003958,NADPH-hemoprotein reductase activity; GO:0009698,phenylpropanoid metabolic process; GO:0009737,response to abscisic acid; GO:0006979,response to oxidative stress; GO:0000166,nucleotide binding; GO:0003674,molecular_function;…	Nitric oxide synthase, oxygenase domain	--	--	--
Cluster-1527.21762	6.74	4.42	0.73	0	0	1.87	92.93	61.01	11.3	0	0	29.28	-2.5734	0.278039	0.904543	630	K02639 ferredoxin | (RefSeq) 2Fe-2S ferredoxin, iron-sulphur binding site (A)	2Fe-2S ferredoxin, iron-sulphur binding site [Ostreococcus tauri]	FER_PERBI RecName: Full=Ferredoxin;	A7YXI8_ALEFU RecName: Full=Ferredoxin {ECO:0000256|RuleBase:RU364001};	--	GO:0009507,chloroplast; GO:0051537,2 iron, 2 sulfur cluster binding; GO:0009055,electron transfer activity; GO:0046872,metal ion binding; GO:0003674,molecular_function; GO:0005488,binding; GO:0048037,cofactor binding; GO:0051536,iron-sulfur cluster binding; GO:0051540,metal cluster binding; GO:0003824,catalytic activity; GO:0016491,oxidoreductase activity; GO:0043167,ion binding; GO:0043169,catio…	2Fe-2S iron-sulfur cluster binding domain	--	--	--
Cluster-1527.39771	2.34	0	3.86	0	0.99	0.05	77.17	0.12	142.73	0	32.2	1.87	-2.5546	0.345231	0.926217	1187	K22763 deubiquitinase DESI2 [EC:3.4.19.12] | (RefSeq) deSI-like protein At4g17486 isoform X1 (A)	PREDICTED: desumoylating isopeptidase 2 [Elaeis guineensis]	--	A0A1Q9E3I8_SYMMI SubName: Full=DeSI-like protein {ECO:0000313|EMBL:OLQ01985.1};	Uncharacterized conserved protein	GO:0005509,calcium ion binding; GO:0003674,molecular_function; GO:0005488,binding; GO:0046872,metal ion binding; GO:0043167,ion binding; GO:0043169,cation binding	PPPDE putative peptidase domain	--	--	--
Cluster-1527.42759	0	1.65	1.9	0.65	0	0	0	94.69	121.28	39.48	0	0	-2.5511	0.490944	0.960382	1882	--	--	--	--	--	--	--	--	--	--
Cluster-1527.31753	3.16	2.04	2.23	0.82	0	0.46	113.08	73.55	89.68	31.38	0	18.84	-2.54496	0.00244135	0.206379	1270	K17579 protein phosphatase 1 regulatory subunit 42 | (RefSeq) hypothetical protein (A)	Protein MEI2-like 4 [Zostera marina]	AML1_ARATH RecName: Full=Protein MEI2-like 1; Short=AML1; AltName: Full=MEI2-like protein 1;	A0A1Q9CV51_SYMMI SubName: Full=Protein MEI2-like 5 {ECO:0000313|EMBL:OLP86798.1};	Protein Mei2, essential for commitment to meiosis, and related proteins	GO:0003729,mRNA binding; GO:0051321,meiotic cell cycle; GO:0006355,regulation of transcription, DNA-templated; GO:0006351,transcription, DNA-templated; GO:0003674,molecular_function; GO:0003676,nucleic acid binding; GO:0003723,RNA binding; GO:0005488,binding; GO:0097159,organic cyclic compound binding; GO:1901363,heterocyclic compound binding; GO:0000003,reproduction; GO:0007049,cell cycle; GO:00…	RNA recognition motif 2	--	--	--
Cluster-1527.14411	0.72	3.16	2.65	0.37	0.78	0	24.29	106.69	100.07	13.36	25.61	0	-2.53317	0.0101855	0.400317	1206	--	--	--	--	--	--	--	--	--	--
Cluster-1527.57754	2.41	4.52	1.96	0	0	1.42	48.74	91.73	44.58	0	0	32.65	-2.53155	0.262972	0.897875	817	K17508 protein phosphatase PTC7 [EC:3.1.3.16] | (RefSeq) probable protein phosphatase 2C 26 isoform X1 (A)	--	--	A0A1Q9CVP7_SYMMI SubName: Full=Uncharacterized protein {ECO:0000313|EMBL:OLP86990.1};	--	GO:0003824,catalytic activity; GO:0003674,molecular_function	--	--	--	--
Cluster-1527.35475	4.27	4.23	4.4	0	0	2.09	260.92	260.83	301.32	0	0	144.41	-2.52891	0.341076	0.925227	2008	--	predicted protein [Micromonas pusilla CCMP1545]	--	A0A1E7FGP3_9STRA SubName: Full=Uncharacterized protein {ECO:0000313|EMBL:OEU17351.1};	--	GO:0016021,integral component of membrane; GO:0005575,cellular_component; GO:0016020,membrane; GO:0031224,intrinsic component of membrane; GO:0044425,membrane part	--	--	--	--
Cluster-1527.51992	29.15	16.82	23.75	6.06	6.49	0	184.67	106.06	172.63	41.37	40.38	0	-2.52441	0.0802956	0.728434	413	--	--	--	--	--	--	Transmembrane 219	--	--	--
Cluster-1527.48646	1.34	0.35	0.43	0.03	0.15	0.18	137.68	36.63	48.93	3.65	15.31	20.52	-2.49591	0.000751666	0.104088	3213	--	--	--	A0A1Q9DQ37_SYMMI SubName: Full=Uncharacterized protein {ECO:0000313|EMBL:OLP97277.1};	--	GO:0016021,integral component of membrane; GO:0005575,cellular_component; GO:0016020,membrane; GO:0031224,intrinsic component of membrane; GO:0044425,membrane part	CHAT domain	--	--	--
Cluster-1527.44408	0.75	0.91	1.49	0.61	0	0	64.35	78.93	143.39	56.37	0.06	0	-2.44266	0.305256	0.913114	2730	--	hypothetical protein CEUSTIGMA_g7113.t1 [Chlamydomonas eustigma]	--	A0A1Q9EIT4_SYMMI SubName: Full=Polycystin-2 {ECO:0000313|EMBL:OLQ07278.1};	Ca2+-modulated nonselective cation channel polycystin	GO:0016021,integral component of membrane; GO:0005575,cellular_component; GO:0016020,membrane; GO:0031224,intrinsic component of membrane; GO:0044425,membrane part	Polycystin cation channel	--	--	--
Cluster-1527.30942	8.44	10.51	12.56	0.08	0.13	5.3	329.76	413.22	550.28	3.26	4.85	234.35	-2.42034	0.128868	0.793866	1365	--	--	--	--	--	--	--	--	--	--
Cluster-1527.36838	0.41	0.44	0.64	0.08	0	0.18	35.36	38.2	62.67	7.61	0	18.06	-2.40877	0.00689745	0.351275	2756	K05681 ATP-binding cassette, subfamily G (WHITE), member 2 | (RefSeq) hypothetical protein (A)	hypothetical protein CHLRE_02g112550v5 [Chlamydomonas reinhardtii]	AB28G_ARATH RecName: Full=ABC transporter G family member 28; Short=ABC transporter ABCG.28; Short=AtABCG28; AltName: Full=Putative white-brown complex homolog protein 29; Short=AtWBC29;	A0A1Q9DIN6_SYMMI SubName: Full=ABC transporter G family member 24 {ECO:0000313|EMBL:OLP95010.1};	Transporter, ABC superfamily (Breast cancer resistance protein)	GO:0016021,integral component of membrane; GO:0005886,plasma membrane; GO:0005524,ATP binding; GO:0042626,ATPase activity, coupled to transmembrane movement of substances; GO:0000166,nucleotide binding; GO:0003674,molecular_function; GO:0005488,binding; GO:0008144,drug binding; GO:0017076,purine nucleotide binding; GO:0030554,adenyl nucleotide binding; GO:0032553,ribonucleotide binding; GO:003255…	ABC-2 type transporter	--	--	--
Cluster-1527.12488	0	6.98	2.98	0	1.86	0	0	116.95	56.15	0	30.53	0	-2.39782	0.516921	0.965977	715	--	--	--	--	--	--	--	--	--	--
Cluster-1527.10204	1.29	1.17	1.51	0	0	0.71	120.98	110.33	157.57	0	0	75.22	-2.38157	0.337472	0.924423	2948	--	PREDICTED: U-box domain-containing protein 12-like [Nelumbo nucifera]	--	A0A1U8ARJ9_NELNU SubName: Full=U-box domain-containing protein 12-like {ECO:0000313|RefSeq:XP_010265630.1};	--	--	Armadillo/beta-catenin-like repeat	--	--	--
Cluster-1527.74568	0	1.78	1.18	0.18	0.41	0	0	143.95	105.4	15.47	32.3	0	-2.36827	0.353388	0.927819	2556	K12489 Arf-GAP with coiled-coil, ANK repeat and PH domain-containing protein | (RefSeq) ADP-ribosylation factor GTPase-activating protein AGD3 (A)	--	--	R1DNG9_EMIHU SubName: Full=Uncharacterized protein {ECO:0000313|EMBL:EOD36497.1, ECO:0000313|EnsemblProtists:EOD36497};	--	--	Ankyrin repeats (3 copies)	--	--	--
Cluster-1527.71487	6.3	5.08	3	0.17	2.65	0	89.82	72.63	48.27	2.67	37.11	0	-2.3506	0.0344678	0.589307	644	--	--	--	--	--	--	--	--	--	--
Cluster-1527.46188	0.3	0.88	0.96	0.35	0.13	0	15.55	45.84	55.75	19.39	6.39	0	-2.27608	0.0239143	0.534771	1740	K00706 1,3-beta-glucan synthase [EC:2.4.1.34] | (RefSeq) 1,3-beta-glucan synthase component FKS1-like (A)	1,3-beta-glucan synthase component fks1 [Quercus suber]	CALS7_ARATH RecName: Full=Callose synthase 7; EC=2.4.1.34; AltName: Full=1,3-beta-glucan synthase; AltName: Full=Protein GLUCAN SYNTHASE-LIKE 7;	A0A1Q9CG59_SYMMI SubName: Full=1,3-beta-glucan synthase component bgs4 {ECO:0000313|EMBL:OLP81911.1};	1,3-beta-glucan synthase/callose synthase catalytic subunit	GO:0000148,1,3-beta-D-glucan synthase complex; GO:0016021,integral component of membrane; GO:0003843,1,3-beta-D-glucan synthase activity; GO:0006075,(1->3)-beta-D-glucan biosynthetic process; GO:0080165,callose deposition in phloem sieve plate; GO:0071555,cell wall organization; GO:0010233,phloem transport; GO:0008360,regulation of cell shape; GO:0003674,molecular_function; GO:0003824,catalytic a…	1,3-beta-glucan synthase component	--	--	--
Cluster-1527.52912	0	0	0	0.39	0.71	0.21	0	0	0	36.64	61.78	20.95	7.77315	2.47158e-08	7.98594e-05	2790	--	--	--	R1CFX4_EMIHU SubName: Full=Uncharacterized protein {ECO:0000313|EMBL:EOD21377.1, ECO:0000313|EnsemblProtists:EOD21377};	--	GO:0016787,hydrolase activity; GO:0003674,molecular_function; GO:0003824,catalytic activity	--	--	--	--
Cluster-1527.72566	2.14	2.28	3.05	0.65	0	0.88	104.8	112.2	167.02	34.3	0	48.86	-2.25139	0.11361	0.775805	1651	--	--	--	A0A1Q9CJ10_SYMMI SubName: Full=Uncharacterized protein {ECO:0000313|EMBL:OLP82903.1};	--	GO:0016021,integral component of membrane; GO:0005575,cellular_component; GO:0016020,membrane; GO:0031224,intrinsic component of membrane; GO:0044425,membrane part	--	--	--	--
Cluster-1527.12635	7.09	0.56	4.87	0.52	0.71	1.34	51	4	40	4	5	11	-2.24362	0.0183555	0.493462	438	--	hypothetical protein DCAR_032037 [Daucus carota subsp. sativus]	--	A0A162A9Q8_DAUCA SubName: Full=Uncharacterized protein {ECO:0000313|EMBL:KZN08616.1};	--	--	--	--	--	--
Cluster-1527.44074	1.08	1.21	0	0	0	0.45	77.67	87.88	0	0	0	36.81	-2.24329	0.545206	0.970292	2324	--	--	--	A0A1Q9DK90_SYMMI SubName: Full=Uncharacterized protein {ECO:0000313|EMBL:OLP95586.1};	--	GO:0016021,integral component of membrane; GO:0005575,cellular_component; GO:0016020,membrane; GO:0031224,intrinsic component of membrane; GO:0044425,membrane part	--	--	--	--
Cluster-1527.81560	0.2	1.01	1.31	0.16	0.08	0.29	23.21	116.09	168.2	19.13	9.46	38.11	-2.21276	0.00223465	0.196029	3557	--	--	--	A0A1Q9F4X1_SYMMI SubName: Full=Attractin-like protein 1 {ECO:0000313|EMBL:OLQ14692.1};	--	GO:0016021,integral component of membrane; GO:0005575,cellular_component; GO:0016020,membrane; GO:0031224,intrinsic component of membrane; GO:0044425,membrane part	GPCR proteolysis site, GPS, motif	--	--	--
Cluster-1527.83958	1.31	1.29	1.34	0	0	0.8	83.13	82.73	95.31	0	0	57.38	-2.20939	0.357409	0.929605	2073	--	putative Glutamine amidotransferase type II [Klebsormidium nitens]	--	A0A1Y1HXS6_KLENI SubName: Full=Putative Glutamine amidotransferase type II {ECO:0000313|EMBL:GAQ82562.1};	--	GO:0016021,integral component of membrane; GO:0016740,transferase activity; GO:0006541,glutamine metabolic process; GO:0003674,molecular_function; GO:0003824,catalytic activity; GO:0008152,metabolic process; GO:0006082,organic acid metabolic process; GO:0006520,cellular amino acid metabolic process; GO:0006807,nitrogen compound metabolic process; GO:0008150,biological_process; GO:0009064,glutamin…	--	--	--	--
Cluster-1527.65845	1.66	0.91	0.75	0.66	0.09	0	66.31	36.6	33.54	28.52	3.44	0	-2.20276	0.0424958	0.621016	1393	--	--	--	--	--	--	HNH/Endo VII superfamily nuclease toxin with a HHH motif	--	--	--
Cluster-1527.54073	11.49	32.62	7.61	6.26	5.35	0.09	359.57	1027.13	267.41	210.42	164.48	3.28	-2.1906	0.108523	0.771588	1139	--	--	--	--	--	--	--	--	--	--
Cluster-1527.28878	3.88	5.68	4.27	1.94	1.23	0	102.5	150.81	126.62	55.16	32	0	-2.16738	0.137163	0.806206	997	--	--	--	--	--	--	EF-hand domain pair	--	--	--
Cluster-1527.42719	0.29	4.3	1.86	0	0.04	1.31	15.14	225.14	108.48	0	1.92	76.8	-2.16298	0.299937	0.911816	1739	--	--	--	--	--	--	--	--	--	--
Cluster-1527.48733	0.5	3.06	2.64	0.56	0.7	0.16	25.72	158.61	152.45	31.14	35.32	9.29	-2.15834	0.00239756	0.203565	1726	--	--	--	A0A1Q9DKG2_SYMMI SubName: Full=Putative aarF domain-containing protein kinase 1 {ECO:0000313|EMBL:OLP95639.1};	--	GO:0005509,calcium ion binding; GO:0016301,kinase activity; GO:0003674,molecular_function; GO:0005488,binding; GO:0046872,metal ion binding; GO:0043167,ion binding; GO:0043169,cation binding; GO:0003824,catalytic activity; GO:0016740,transferase activity; GO:0016772,transferase activity, transferring phosphorus-containing groups	Domain of unknown function (DUF1768)	--	--	--
Cluster-1527.72771	3.03	1.43	1.98	0	0	1.35	101.47	48.11	74.53	0	0	51.36	-2.15335	0.367457	0.933319	1202	--	--	--	--	--	--	Ubiquitin family	--	--	--
Cluster-1527.13406	1.61	2.19	3.99	0.34	1.14	0.26	47.19	64.53	131.3	10.68	32.69	8.68	-2.14141	0.000857154	0.111029	1081	--	--	--	A0A1Q9EPS5_SYMMI SubName: Full=Uncharacterized protein {ECO:0000313|EMBL:OLQ09436.1};	--	GO:0016021,integral component of membrane; GO:0003676,nucleic acid binding; GO:0008146,sulfotransferase activity; GO:0003674,molecular_function; GO:0005488,binding; GO:0097159,organic cyclic compound binding; GO:1901363,heterocyclic compound binding; GO:0003824,catalytic activity; GO:0016740,transferase activity; GO:0016782,transferase activity, transferring sulfur-containing groups; GO:0005575,c…	--	--	--	--
Cluster-1527.28334	2.16	1.14	0.61	0.15	0.46	0.28	68.3	36.18	21.51	5.17	14.42	9.99	-2.13607	0.00253114	0.210904	1147	K17579 protein phosphatase 1 regulatory subunit 42 | (RefSeq) hypothetical protein (A)	putative protein MEI2-like 2 [Helianthus annuus]	AML3_ARATH RecName: Full=Protein MEI2-like 3; Short=AML3; AltName: Full=MEI2-like protein 3;	A0A1Q9DG42_SYMMI SubName: Full=Protein MEI2-like 4 {ECO:0000313|EMBL:OLP94119.1};	Protein Mei2, essential for commitment to meiosis, and related proteins	GO:0003723,RNA binding; GO:0051321,meiotic cell cycle; GO:0045927,positive regulation of growth; GO:0045836,positive regulation of meiotic nuclear division; GO:0003674,molecular_function; GO:0003676,nucleic acid binding; GO:0005488,binding; GO:0097159,organic cyclic compound binding; GO:1901363,heterocyclic compound binding; GO:0000003,reproduction; GO:0007049,cell cycle; GO:0008150,biological_pr…	RNA recognition motif 2	--	--	--
Cluster-1527.73034	0	0	0	2.69	1.26	0.36	0	0	0	78.97	33.67	11.06	7.76397	1.61613e-07	0.000375977	1022	--	--	--	A0A1Q9CLA0_SYMMI RecName: Full=Chloride channel protein {ECO:0000256|RuleBase:RU361221};	--	GO:0016021,integral component of membrane; GO:0016301,kinase activity; GO:0046872,metal ion binding; GO:0003950,NAD+ ADP-ribosyltransferase activity; GO:0005247,voltage-gated chloride channel activity; GO:0003674,molecular_function; GO:0003824,catalytic activity; GO:0016740,transferase activity; GO:0016772,transferase activity, transferring phosphorus-containing groups; GO:0005488,binding; GO:004…	--	--	--	--
Cluster-1527.76908	0	0	0	0.27	0.16	0.22	0	0	0	47.2	25.98	41.45	7.65979	9.73725e-09	3.33128e-05	4992	--	hypothetical protein TSOC_008273 [Tetrabaena socialis]	--	A0A1Q9CLZ8_SYMMI SubName: Full=Protein FAM3B {ECO:0000313|EMBL:OLP83959.1};	--	GO:0016021,integral component of membrane; GO:0016747,transferase activity, transferring acyl groups other than amino-acyl groups; GO:0003674,molecular_function; GO:0003824,catalytic activity; GO:0016740,transferase activity; GO:0016746,transferase activity, transferring acyl groups; GO:0005575,cellular_component; GO:0016020,membrane; GO:0031224,intrinsic component of membrane; GO:0044425,membran…	--	--	--	--
Cluster-1527.39776	2.48	5.09	7.99	2.79	0	0.85	105.61	218.3	381.53	127.96	0.19	41.07	-2.1214	0.206756	0.868602	1468	K22763 deubiquitinase DESI2 [EC:3.4.19.12] | (RefSeq) predicted protein (A)	uncharacterized protein LOC109826302 [Asparagus officinalis]	--	A0A1Q9E3I8_SYMMI SubName: Full=DeSI-like protein {ECO:0000313|EMBL:OLQ01985.1};	Uncharacterized conserved protein	GO:0005509,calcium ion binding; GO:0003674,molecular_function; GO:0005488,binding; GO:0046872,metal ion binding; GO:0043167,ion binding; GO:0043169,cation binding	PPPDE putative peptidase domain	--	--	--
Cluster-1527.72876	15.96	10.4	18.18	4.17	4.59	1.77	39	25	53	11	11	5	-2.11197	0.00046204	0.0759104	296	K02108 F-type H+-transporting ATPase subunit a | (RefSeq) uncharacterized protein LOC110266878 (A)	hypothetical protein SOVF_212770, partial [Spinacia oleracea]	--	A0A0K9Q7A6_SPIOL SubName: Full=Uncharacterized protein {ECO:0000313|EMBL:KNA03059.1}; Flags: Fragment;	--	--	--	--	--	--
Cluster-1527.32452	1.57	1.66	5.23	0	1.95	0	57.93	61.77	216.93	0	70.8	0	-2.10355	1	1	1305	--	--	--	--	--	--	--	--	--	--
Cluster-1527.27983	0.91	1.2	1.68	0	0.89	0	34.28	45.64	71.38	0	32.94	0	-2.08413	0.360936	0.930635	1328	--	--	--	A0A1Q9CLM6_SYMMI SubName: Full=Uncharacterized protein {ECO:0000313|EMBL:OLP83839.1};	--	GO:0016021,integral component of membrane; GO:0005575,cellular_component; GO:0016020,membrane; GO:0031224,intrinsic component of membrane; GO:0044425,membrane part	--	--	--	--
Cluster-1527.25348	6.58	5.59	9.33	2.97	0	2.1	155.12	132.59	247.45	75.41	0	56.07	-2.08307	0.172164	0.838503	915	K24926 tetratricopeptide repeat protein 1 | (RefSeq) tetratricopeptide repeat protein 1-like (A)	PREDICTED: tetratricopeptide repeat protein 1 [Erythranthe guttata]	TTL1_ARATH RecName: Full=TPR repeat-containing thioredoxin TTL1; AltName: Full=Tetratricopeptide repeat thioredoxin-like 1;	A0A1Q9CK06_SYMMI SubName: Full=Tetratricopeptide repeat protein 1 {ECO:0000313|EMBL:OLP83258.1};	TPR repeat-containing protein	GO:0005623,cell; GO:0009738,abscisic acid-activated signaling pathway; GO:0045454,cell redox homeostasis; GO:0009789,positive regulation of abscisic acid-activated signaling pathway; GO:0009737,response to abscisic acid; GO:0006970,response to osmotic stress; GO:0009651,response to salt stress; GO:0001101,response to acid chemical; GO:0007165,signal transduction; GO:0007154,cell communication; GO…	Tetratricopeptide repeat	--	--	--
Cluster-1527.13627	3.47	1.13	2.42	0.22	0.68	0.71	94.07	30.76	73.72	6.55	18.03	21.95	-2.07128	0.000913349	0.115314	1018	--	hypothetical protein CDL12_09352 [Handroanthus impetiginosus]	--	A0A2G9HKC1_9LAMI SubName: Full=Uncharacterized protein {ECO:0000313|EMBL:PIN17982.1};	--	--	--	--	--	--
Cluster-1527.34305	2.93	1.69	2.28	0	1.65	0	56.09	32.43	49.2	0	30.91	0	-2.05297	0.363173	0.931553	785	--	--	--	A0A1Q9CTL2_SYMMI RecName: Full=Poly [ADP-ribose] polymerase {ECO:0000256|RuleBase:RU362114}; Short=PARP {ECO:0000256|RuleBase:RU362114}; EC=2.4.2.30 {ECO:0000256|RuleBase:RU362114}; EC=3.2.1.- {ECO:0000256|RuleBase:RU000489};	--	GO:0005576,extracellular region; GO:0016021,integral component of membrane; GO:0008061,chitin binding; GO:0020037,heme binding; GO:0004553,hydrolase activity, hydrolyzing O-glycosyl compounds; GO:0046872,metal ion binding; GO:0003950,NAD+ ADP-ribosyltransferase activity; GO:0016491,oxidoreductase activity; GO:0031625,ubiquitin protein ligase binding; GO:0005975,carbohydrate metabolic process; GO:…	Poly(ADP-ribose) polymerase catalytic domain	--	--	--
Cluster-1527.47874	0	0	0	0.12	0.13	0.05	0	0	0	38.01	37.49	15.99	7.35253	1.78664e-07	0.000399658	8807	--	--	--	A0A0M0J537_9EUKA SubName: Full=Helicase conserved c-terminal domain containing protein {ECO:0000313|EMBL:KOO21711.1}; Flags: Fragment;	--	GO:0016020,membrane; GO:0005524,ATP binding; GO:0004386,helicase activity; GO:0017038,protein import; GO:0000166,nucleotide binding; GO:0003674,molecular_function; GO:0005488,binding; GO:0008144,drug binding; GO:0017076,purine nucleotide binding; GO:0030554,adenyl nucleotide binding; GO:0032553,ribonucleotide binding; GO:0032555,purine ribonucleotide binding; GO:0032559,adenyl ribonucleotide bind…	DnaJ domain	--	--	--
Cluster-1527.10464	3.54	3.91	0	0.57	0	1.22	41.34	45.78	0	7.23	0	16.19	-2.02356	0.183019	0.849506	569	--	--	--	--	--	--	Ankyrin repeats (many copies)	--	--	--
Cluster-1527.10705	15.93	7.51	17.49	3.94	2.43	3.69	60	28	77	16	9	16	-2.01524	0.000255575	0.05271	337	--	hypothetical protein BVRB_018590 [Beta vulgaris subsp. vulgaris]	--	A0A0J7YN94_BETVU SubName: Full=Uncharacterized protein {ECO:0000313|EMBL:KMS64603.1};	--	--	--	--	--	--
Cluster-1527.12681	0.91	1.2	1.18	0	0	0.77	49.12	65.36	71.46	0	0	47.13	-1.98805	0.396762	0.940194	1807	--	hypothetical protein CHLRE_01g034200v5 [Chlamydomonas reinhardtii]	--	A0A1Q9CYF1_SYMMI SubName: Full=STI1-like protein {ECO:0000313|EMBL:OLP87962.1};	--	GO:0016021,integral component of membrane; GO:0005575,cellular_component; GO:0016020,membrane; GO:0031224,intrinsic component of membrane; GO:0044425,membrane part	Bacterial extracellular solute-binding protein	--	--	--
Cluster-1527.63334	1.43	2.1	0	0.57	0.32	0	38.62	57.3	0	16.72	8.62	0	-1.98549	0.188917	0.854145	1017	--	PREDICTED: uncharacterized protein y4mH-like [Ziziphus jujuba]	--	A0A1Q9CXE7_SYMMI SubName: Full=60S ribosomal export protein NMD3 {ECO:0000313|EMBL:OLP87600.1};	--	GO:0016787,hydrolase activity; GO:0046872,metal ion binding; GO:0003674,molecular_function; GO:0003824,catalytic activity; GO:0005488,binding; GO:0043167,ion binding; GO:0043169,cation binding	Amidohydrolase	--	--	--
Cluster-1527.31174	2.36	5.33	5.19	0.2	0.06	2.85	165.57	376.29	407.04	15.31	4.43	225.9	-1.96166	1	1	2267	K11968 ariadne-1 [EC:2.3.2.31] | (RefSeq) probable E3 ubiquitin-protein ligase ARI2 isoform X1 (A)	predicted protein [Micromonas pusilla CCMP1545]	HBL1_ARATH RecName: Full=Non-symbiotic hemoglobin 1; AltName: Full=ARAth GLB1; Short=Hb1;	C1MGW9_MICPC SubName: Full=Predicted protein {ECO:0000313|EMBL:EEH60646.1};	Globins and related hemoproteins	GO:0005618,cell wall; GO:0005829,cytosol; GO:0005886,plasma membrane; GO:0009506,plasmodesma; GO:0020037,heme binding; GO:0046872,metal ion binding; GO:0019825,oxygen binding; GO:0001666,response to hypoxia; GO:0003674,molecular_function; GO:0005488,binding; GO:0046906,tetrapyrrole binding; GO:0048037,cofactor binding; GO:0097159,organic cyclic compound binding; GO:1901363,heterocyclic compound b…	Globin	--	--	--
Cluster-1527.54883	25.7	7.32	10.64	6.79	5.01	0	593.72	170.02	276.6	168.69	113.68	0	-1.922	0.27575	0.903885	901	K01674 carbonic anhydrase [EC:4.2.1.1] | (RefSeq) alpha carbonic anhydrase 7-like (A)	Carb_anhydrase domain-containing protein, partial [Cephalotus follicularis]	ATCA7_ARATH RecName: Full=Alpha carbonic anhydrase 7; Short=AtaCA7; Short=AtalphaCA7; EC=4.2.1.1; AltName: Full=Alpha carbonate dehydratase 7; Flags: Precursor;	R1DAV9_EMIHU SubName: Full=Alpha-type carbonic anhydrase {ECO:0000313|EMBL:EOD32568.1}; Flags: Fragment;	Carbonic anhydrase	GO:0009570,chloroplast stroma; GO:0004089,carbonate dehydratase activity; GO:0008270,zinc ion binding; GO:0006730,one-carbon metabolic process; GO:0003674,molecular_function; GO:0003824,catalytic activity; GO:0016829,lyase activity; GO:0016835,carbon-oxygen lyase activity; GO:0016836,hydro-lyase activity; GO:0005488,binding; GO:0046872,metal ion binding; GO:0043167,ion binding; GO:0043169,cation …	Eukaryotic-type carbonic anhydrase	--	--	--
Cluster-1527.39885	0	0	0	1.22	0.84	0.01	0	0	0	53.75	34.1	0.52	7.29996	3.46238e-05	0.0145155	1423	--	--	--	--	--	--	--	--	--	--
Cluster-1527.10703	50.48	12.06	62.71	7.15	12.45	13.64	157	37	230	24	38	49	-1.89993	0.00168434	0.167169	317	--	hypothetical protein SOVF_215730, partial [Spinacia oleracea]	--	A0A0K9Q7S3_SPIOL SubName: Full=Uncharacterized protein {ECO:0000313|EMBL:KNA02748.1}; Flags: Fragment;	--	--	--	--	--	--
Cluster-1527.10842	1.4	1.9	0.98	0.77	0.08	0.32	70.64	96.73	55.79	42.13	3.9	18.48	-1.89179	0.00562415	0.322266	1700	--	--	--	--	--	--	--	--	--	--
Cluster-1527.17886	42.51	13.95	51.71	10.99	9.52	9.44	50	16	75	14	11	13	-1.87998	0.00350577	0.252862	251	--	BnaC09g29270D [Brassica napus]	--	A0A078G2X3_BRANA SubName: Full=BnaC09g29270D protein {ECO:0000313|EMBL:CDY19671.1};	--	--	--	--	--	--
Cluster-1527.34566	2.77	0.67	2.09	1.59	0	0	131.28	32.02	110.84	81.22	0	0	-1.86393	0.463368	0.956058	1607	K03231 elongation factor 1-alpha | (RefSeq) Elongation factor 1-alpha (A)	Elongation factor 1-alpha [Auxenochlorella protothecoides]	EF1A_EUGGR RecName: Full=Elongation factor 1-alpha; Short=EF-1-alpha;	A0A1Q9E562_SYMMI SubName: Full=Elongation factor 1-alpha {ECO:0000313|EMBL:OLQ02557.1};	Translation elongation factor EF-1 alpha/Tu	GO:0005737,cytoplasm; GO:0005525,GTP binding; GO:0003924,GTPase activity; GO:0003746,translation elongation factor activity; GO:0000166,nucleotide binding; GO:0001882,nucleoside binding; GO:0001883,purine nucleoside binding; GO:0003674,molecular_function; GO:0005488,binding; GO:0017076,purine nucleotide binding; GO:0019001,guanyl nucleotide binding; GO:0032549,ribonucleoside binding; GO:0032550,p…	Elongation factor Tu GTP binding domain	--	--	--
Cluster-1527.74542	0.32	1.67	2.08	1.11	0	0.05	8.74	46.39	64.7	33.12	0	1.69	-1.85009	0.142622	0.809858	1033	K08907 light-harvesting complex I chlorophyll a/b binding protein 1 | (RefSeq) light-harvesting complex protein (A)	hypothetical protein GPECTOR_17g812 [Gonium pectorale]	FCPA_MACPY RecName: Full=Fucoxanthin-chlorophyll a-c binding protein A, chloroplastic; Flags: Precursor;	E0WEC8_9DINO SubName: Full=Light-harvesting protein {ECO:0000313|EMBL:CBI83412.1}; Flags: Fragment;	--	GO:0009535,chloroplast thylakoid membrane; GO:0016021,integral component of membrane; GO:0030076,light-harvesting complex; GO:0009523,photosystem II; GO:0016168,chlorophyll binding; GO:0009765,photosynthesis, light harvesting; GO:0018298,protein-chromophore linkage; GO:0003674,molecular_function; GO:0005488,binding; GO:0043167,ion binding; GO:0043168,anion binding; GO:0046906,tetrapyrrole binding…	Chlorophyll A-B binding protein	--	--	--
Cluster-1527.5369	0.55	0.72	0.53	0	0	0.47	38.16	50.34	41.32	0	0	37.22	-1.82466	0.421909	0.946691	2258	K12823 ATP-dependent RNA helicase DDX5/DBP2 [EC:3.6.4.13] | (RefSeq) DEAD-box ATP-dependent RNA helicase 20-like (A)	DEAD-box ATP-dependent RNA helicase 20-like [Manihot esculenta]	RH30_ARATH RecName: Full=DEAD-box ATP-dependent RNA helicase 30; EC=3.6.4.13;	A0A2C9VS56_MANES SubName: Full=Uncharacterized protein {ECO:0000313|EMBL:OAY47836.1};	ATP-dependent RNA helicase	GO:0005737,cytoplasm; GO:0005730,nucleolus; GO:0005524,ATP binding; GO:0004004,ATP-dependent RNA helicase activity; GO:0003729,mRNA binding; GO:0000184,nuclear-transcribed mRNA catabolic process, nonsense-mediated decay; GO:0010501,RNA secondary structure unwinding; GO:0006364,rRNA processing; GO:0000166,nucleotide binding; GO:0003674,molecular_function; GO:0005488,binding; GO:0008144,drug bindin…	DEAD/DEAH box helicase	--	--	--
Cluster-1527.56420	3.49	7.92	5.1	1.95	2.84	0	67.24	153.2	110.6	40.39	53.8	0	-1.81447	0.231572	0.882645	789	K17579 protein phosphatase 1 regulatory subunit 42 | (RefSeq) hypothetical protein (A)	protein terminal ear1 homolog [Aegilops tauschii subsp. tauschii]	TE1_MAIZE RecName: Full=Protein terminal ear1;	A0A1Q9DG42_SYMMI SubName: Full=Protein MEI2-like 4 {ECO:0000313|EMBL:OLP94119.1};	Protein Mei2, essential for commitment to meiosis, and related proteins	GO:0003723,RNA binding; GO:0007275,multicellular organism development; GO:0003674,molecular_function; GO:0003676,nucleic acid binding; GO:0005488,binding; GO:0097159,organic cyclic compound binding; GO:1901363,heterocyclic compound binding; GO:0008150,biological_process; GO:0032501,multicellular organismal process; GO:0032502,developmental process; GO:0048856,anatomical structure development	RNA recognition motif 2	--	--	--
Cluster-1527.18405	0.32	9.71	9.95	4.07	1.97	0	2.12	63.59	74.97	28.81	12.69	0	-1.76536	0.166816	0.834805	420	--	--	--	--	--	--	--	--	--	--
Cluster-1527.20953	10.7	8.87	12.28	0.06	6.91	2.23	169.96	141.25	220.16	0.98	107.85	40.29	-1.7612	0.188038	0.853704	691	K02639 ferredoxin | (RefSeq) 2Fe-2S ferredoxin, iron-sulphur binding site (A)	2Fe-2S ferredoxin, iron-sulphur binding site [Ostreococcus tauri]	FER_PERBI RecName: Full=Ferredoxin;	A7YXI8_ALEFU RecName: Full=Ferredoxin {ECO:0000256|RuleBase:RU364001};	--	GO:0009507,chloroplast; GO:0051537,2 iron, 2 sulfur cluster binding; GO:0009055,electron transfer activity; GO:0046872,metal ion binding; GO:0003674,molecular_function; GO:0005488,binding; GO:0048037,cofactor binding; GO:0051536,iron-sulfur cluster binding; GO:0051540,metal cluster binding; GO:0003824,catalytic activity; GO:0016491,oxidoreductase activity; GO:0043167,ion binding; GO:0043169,catio…	2Fe-2S iron-sulfur cluster binding domain	--	--	--
Cluster-1527.37122	5.11	19.62	5.82	5.8	3.52	0	105.83	407.89	135.56	129.1	71.61	0	-1.75945	0.312282	0.916162	831	K04079 molecular chaperone HtpG | (RefSeq) HSP90A; heat shock protein 90A (A)	heat shock protein 90A [Chlamydomonas reinhardtii]	HS902_ARATH RecName: Full=Heat shock protein 90-2 {ECO:0000305}; Short=AtHSP90.2 {ECO:0000305}; Short=AtHsp90-2 {ECO:0000303|PubMed:11599565}; AltName: Full=Heat shock protein 81-2 {ECO:0000305}; Short=Hsp81-2 {ECO:0000303|PubMed:11599565}; AltName: Full=Protein EARLY-RESPONSIVE TO DEHYDRATION 8; AltName: Full=Protein LOSS OF RECOGNITION OF AVRRPM1 2; AltName: Full=Protein MUTANT SNC1-ENHANCING 1…	E8Z717_KARVE SubName: Full=HSP90 {ECO:0000313|EMBL:ACU45247.1}; Flags: Fragment;	Molecular chaperone (HSP90 family)	GO:0005737,cytoplasm; GO:0005524,ATP binding; GO:0016887,ATPase activity; GO:0051082,unfolded protein binding; GO:0061077,chaperone-mediated protein folding; GO:0009816,defense response to bacterium, incompatible interaction; GO:0000166,nucleotide binding; GO:0003674,molecular_function; GO:0005488,binding; GO:0008144,drug binding; GO:0017076,purine nucleotide binding; GO:0030554,adenyl nucleotide…	Hsp90 protein	--	--	--
Cluster-1527.10474	0.88	0.67	0.12	0	0	0.46	121.43	93.14	19.06	0	0	71.82	-1.75726	0.49851	0.961819	4234	--	--	--	A0A1Q9EBW3_SYMMI RecName: Full=Probable ribosome biogenesis protein AK812_SmicGene11950 {ECO:0000256|HAMAP-Rule:MF_03146};	--	GO:0016021,integral component of membrane; GO:0005524,ATP binding; GO:0008017,microtubule binding; GO:0003777,microtubule motor activity; GO:0007018,microtubule-based movement; GO:0006364,rRNA processing; GO:0000166,nucleotide binding; GO:0003674,molecular_function; GO:0005488,binding; GO:0008144,drug binding; GO:0017076,purine nucleotide binding; GO:0030554,adenyl nucleotide binding; GO:0032553,…	Ankyrin repeats (3 copies)	--	--	--
Cluster-1527.51130	0.64	1.23	0.95	0.1	0.35	0.36	45.7	88.29	75.91	8.01	24.73	29.23	-1.74933	0.00226381	0.197215	2297	--	PREDICTED: cytochrome b561 and DOMON domain-containing protein At3g61750 [Ipomoea nil]	B561A_ARATH RecName: Full=Cytochrome b561, DM13 and DOMON domain-containing protein At5g54830; AltName: Full=Protein b561A.tha1; Flags: Precursor;	D7G2R8_ECTSI SubName: Full=Uncharacterized protein {ECO:0000313|EMBL:CBJ26893.1};	Predicted membrane protein, contains DoH and Cytochrome b-561/ferric reductase transmembrane domains	GO:0005768,endosome; GO:0005794,Golgi apparatus; GO:0016021,integral component of membrane; GO:0005802,trans-Golgi network; GO:0046872,metal ion binding; GO:0055114,oxidation-reduction process; GO:0003674,molecular_function; GO:0005488,binding; GO:0043167,ion binding; GO:0043169,cation binding; GO:0008152,metabolic process; GO:0008150,biological_process; GO:0005622,intracellular; GO:0005575,cellu…	Eukaryotic cytochrome b561	--	--	--
Cluster-1527.42514	6.63	8.6	9.4	2.21	0	4.99	424.27	554.72	674.01	152.39	0	361.67	-1.72139	0.342483	0.925481	2091	--	--	--	R1FHY3_EMIHU SubName: Full=Uncharacterized protein {ECO:0000313|EMBL:EOD35146.1, ECO:0000313|EnsemblProtists:EOD35146};	--	GO:0016020,membrane; GO:0003885,D-arabinono-1,4-lactone oxidase activity; GO:0050660,flavin adenine dinucleotide binding; GO:0003674,molecular_function; GO:0003824,catalytic activity; GO:0016491,oxidoreductase activity; GO:0016614,oxidoreductase activity, acting on CH-OH group of donors; GO:0016899,oxidoreductase activity, acting on the CH-OH group of donors, oxygen as acceptor; GO:0000166,nucleo…	FAD binding domain	--	--	--
Cluster-1527.82593	2	1.89	2.11	0.83	0.91	0.14	52.24	49.67	61.78	23.34	23.43	4.15	-1.72076	0.00573297	0.32498	988	--	--	--	--	--	--	--	--	--	--
Cluster-1527.82530	1.18	0.89	2.29	0.89	0.22	0.22	36	27.24	78.45	29.36	6.63	7.5	-1.70103	0.0144425	0.453184	1117	K20893 probable galacturonosyltransferase-like 1 [EC:2.4.1.-] | (RefSeq) probable galacturonosyltransferase-like 1 (A)	probable galacturonosyltransferase-like 4 [Carica papaya]	GATL3_ARATH RecName: Full=Probable galacturonosyltransferase-like 3; EC=2.4.1.-;	B9HKM7_POPTR RecName: Full=Hexosyltransferase {ECO:0000256|RuleBase:RU362027}; EC=2.4.1.- {ECO:0000256|RuleBase:RU362027};	--	GO:0005794,Golgi apparatus; GO:0000139,Golgi membrane; GO:0016021,integral component of membrane; GO:0047262,polygalacturonate 4-alpha-galacturonosyltransferase activity; GO:0016757,transferase activity, transferring glycosyl groups; GO:0071555,cell wall organization; GO:0045489,pectin biosynthetic process; GO:0000271,polysaccharide biosynthetic process; GO:0003674,molecular_function; GO:0003824,…	Glycosyl transferase family 8	--	--	--
Cluster-1527.46011	0.52	0.9	1.27	0.26	0	0.53	20.35	35.91	56.39	11.06	0	23.54	-1.69687	0.0879562	0.740462	1376	--	--	--	--	--	--	--	--	--	--
Cluster-1527.23715	0.82	0.52	0.91	0	0.7	0	60.24	38.08	74.84	0	50.33	0	-1.68548	0.484285	0.959465	2355	--	--	--	A0A1Q9DSU2_SYMMI SubName: Full=30S ribosomal protein S1 {ECO:0000313|EMBL:OLP98243.1};	--	GO:0005840,ribosome; GO:0003676,nucleic acid binding; GO:0003674,molecular_function; GO:0005488,binding; GO:0097159,organic cyclic compound binding; GO:1901363,heterocyclic compound binding; GO:0005622,intracellular; GO:0005575,cellular_component; GO:1990904,ribonucleoprotein complex; GO:0005623,cell; GO:0005737,cytoplasm; GO:0032991,protein-containing complex; GO:0043226,organelle; GO:0043228,no…	Pyocin activator protein PrtN	--	--	--
Cluster-1527.12267	2	0.91	2.98	0.58	0.52	0.7	35	16	59	11	9	14	-1.6812	0.00872106	0.378491	739	--	Metal transporter Nramp5 [Morus notabilis]	--	W9SBV7_9ROSA SubName: Full=Metal transporter Nramp5 {ECO:0000313|EMBL:EXC34899.1};	--	GO:0016021,integral component of membrane; GO:0046873,metal ion transmembrane transporter activity; GO:0003674,molecular_function; GO:0005215,transporter activity; GO:0022857,transmembrane transporter activity; GO:0008324,cation transmembrane transporter activity; GO:0015075,ion transmembrane transporter activity; GO:0015318,inorganic molecular entity transmembrane transporter activity; GO:002289…	--	--	--	--
Cluster-1527.63913	0	0.03	0	1.51	1.25	0.17	0	1.77	0.08	93.24	70.85	11.26	6.41172	1.49087e-06	0.00176957	1905	--	predicted protein [Micromonas pusilla CCMP1545]	--	A0A1Q9C4B8_SYMMI SubName: Full=6-phosphogluconolactonase {ECO:0000313|EMBL:OLP77762.1};	--	GO:0016021,integral component of membrane; GO:0003676,nucleic acid binding; GO:0003674,molecular_function; GO:0005488,binding; GO:0097159,organic cyclic compound binding; GO:1901363,heterocyclic compound binding; GO:0005575,cellular_component; GO:0016020,membrane; GO:0031224,intrinsic component of membrane; GO:0044425,membrane part	Lactonase, 7-bladed beta-propeller	--	--	--
Cluster-1527.45285	1.15	0.86	7.95	1.52	0.4	1.19	47.44	35.76	367.2	67.2	16.22	55.37	-1.67156	0.0375843	0.601317	1426	--	hypothetical protein CHLNCDRAFT_57156 [Chlorella variabilis]	--	F0YI04_AURAN SubName: Full=Uncharacterized protein {ECO:0000313|EMBL:EGB05322.1};	--	GO:0016746,transferase activity, transferring acyl groups; GO:0008152,metabolic process; GO:0003674,molecular_function; GO:0003824,catalytic activity; GO:0016740,transferase activity; GO:0008150,biological_process	EamA-like transporter family	--	--	--
Cluster-1527.45775	3.44	9.53	4.74	4.46	0	1.25	274.25	765.42	423.2	381.91	0.01	113	-1.66885	0.369414	0.933689	2546	--	PREDICTED: uncharacterized protein LOC104895248 [Beta vulgaris subsp. vulgaris]	--	A0A1Q9EUE8_SYMMI SubName: Full=Inter-alpha-trypsin inhibitor heavy chain H4 {ECO:0000313|EMBL:OLQ11054.1};	--	--	Coronavirus nucleocapsid protein	--	--	--
Cluster-1527.75793	1.02	1.04	0.93	0.36	0.3	0.28	42	43	43	16	12	13	-1.66434	0.000353152	0.0648146	1424	K19044 E3 ubiquitin-protein ligase XBAT32/33 [EC:2.3.2.27] | (RefSeq) probable E3 ubiquitin-protein ligase XBOS32-like (A)	PREDICTED: receptor-interacting serine/threonine-protein kinase 4 [Oryza sativa Japonica Group]	XB36_ORYSJ RecName: Full=Probable E3 ubiquitin-protein ligase XBOS36; EC=2.3.2.27; AltName: Full=Ankyrin repeat domain and RING finger-containing protein XBOS36; AltName: Full=RING-type E3 ubiquitin transferase XBOS36; AltName: Full=XB3 protein homolog 6;	A0A1Q9E910_SYMMI SubName: Full=Ankyrin repeat family A protein 2 {ECO:0000313|EMBL:OLQ03897.1};	--	GO:0046872,metal ion binding; GO:0016740,transferase activity; GO:0016567,protein ubiquitination; GO:0003674,molecular_function; GO:0005488,binding; GO:0043167,ion binding; GO:0043169,cation binding; GO:0003824,catalytic activity; GO:0008152,metabolic process; GO:0006464,cellular protein modification process; GO:0006807,nitrogen compound metabolic process; GO:0008150,biological_process; GO:000998…	Ankyrin repeats (3 copies)	--	--	--
Cluster-1527.56937	0	0.01	0.02	0.81	0.54	0.03	0.07	0.48	1.64	75.87	46.47	2.64	5.97475	7.00586e-05	0.0224899	2759	--	flagellar protein [Chlamydomonas reinhardtii]	--	A0A1Q9EIT4_SYMMI SubName: Full=Polycystin-2 {ECO:0000313|EMBL:OLQ07278.1};	Ca2+-modulated nonselective cation channel polycystin	GO:0016021,integral component of membrane; GO:0005575,cellular_component; GO:0016020,membrane; GO:0031224,intrinsic component of membrane; GO:0044425,membrane part	Polycystin cation channel	--	--	--
Cluster-1527.47642	0.13	0.89	1.33	0.31	0.45	0	6.4	45.39	75.48	16.88	22.43	0	-1.64836	0.152326	0.821197	1697	--	--	--	A0A1Q9E453_SYMMI SubName: Full=Uncharacterized protein {ECO:0000313|EMBL:OLQ02198.1};	--	--	--	--	--	--
Cluster-1527.15370	0	0.02	0	0.36	0.12	0.57	0	2.8	0	53.87	15.88	88.07	5.66	1.18558e-06	0.00149899	4231	--	--	--	A0A1Q9EN83_SYMMI SubName: Full=Uncharacterized protein {ECO:0000313|EMBL:OLQ08906.1};	--	GO:0020037,heme binding; GO:0005506,iron ion binding; GO:0016705,oxidoreductase activity, acting on paired donors, with incorporation or reduction of molecular oxygen; GO:0016702,oxidoreductase activity, acting on single donors with incorporation of molecular oxygen, incorporation of two atoms of oxygen; GO:0003674,molecular_function; GO:0005488,binding; GO:0046906,tetrapyrrole binding; GO:004803…	Cytochrome P450	--	--	--
Cluster-1527.3696	0.69	0.91	0.55	0.24	0.15	0.29	37.85	50.33	34.09	14.33	7.99	18.3	-1.64468	0.00228948	0.198741	1824	--	--	--	--	--	--	--	--	--	--
Cluster-1527.47340	1.53	2.43	1.3	0.33	0.68	0.66	55.72	88.98	52.96	13.01	24.5	27.02	-1.64305	0.00106348	0.125019	1287	--	--	--	A0A1Q9F586_SYMMI SubName: Full=Uncharacterized protein {ECO:0000313|EMBL:OLQ14848.1};	--	--	--	--	--	--
Cluster-1527.10701	0.72	1.11	2.35	0.31	0.81	0.22	31.89	49.5	116.37	14.79	35.15	11.18	-1.64173	0.0125227	0.430507	1513	--	--	--	--	--	--	--	--	--	--
Cluster-1527.76038	0.04	2.08	3.13	0.03	1.64	0.01	1.42	78.95	132.49	1.3	60.88	0.6	-1.61848	0.427271	0.948189	1326	K15919 glyoxylate/hydroxypyruvate reductase [EC:1.1.1.79 1.1.1.81] | (RefSeq) hypothetical protein (A)	UTP:RNA uridylyltransferase 1 [Sorghum bicolor]	URT1_ARATH RecName: Full=UTP:RNA uridylyltransferase 1 {ECO:0000303|PubMed:23748567}; EC=2.7.7.52 {ECO:0000269|PubMed:23748567};	A0A1Q9E1W0_SYMMI SubName: Full=Poly(A) RNA polymerase gld-2 {ECO:0000313|EMBL:OLQ01416.1};	S-M checkpoint control protein CID1 and related nucleotidyltransferases	GO:0000932,P-body; GO:0046872,metal ion binding; GO:0003729,mRNA binding; GO:0050265,RNA uridylyltransferase activity; GO:0006397,mRNA processing; GO:1903705,positive regulation of production of siRNA involved in RNA interference; GO:0060964,regulation of gene silencing by miRNA; GO:0071076,RNA 3' uridylation; GO:0003674,molecular_function; GO:0005488,binding; GO:0043167,ion binding; GO:0043169,c…	Cid1 family poly A polymerase	--	--	--
Cluster-1527.81893	60.54	46.26	59.79	3.29	22.17	27.31	803	615	897	47	289	412	-1.60329	0.0520033	0.656564	615	K23882 CDGSH iron-sulfur domain-containing protein 2 | (RefSeq) CDGSH iron-sulfur domain-containing protein NEET (A)	PREDICTED: CDGSH iron-sulfur domain-containing protein NEET [Malus domestica]	NEET_ARATH RecName: Full=CDGSH iron-sulfur domain-containing protein NEET; Short=At-NEET;	A0A1E7EJJ5_9STRA SubName: Full=Iron-sulfur domain-containing NEET-like protein {ECO:0000313|EMBL:OEU06071.1};	CDGSH-type Zn-finger containing protein	GO:0009507,chloroplast; GO:0009570,chloroplast stroma; GO:0005739,mitochondrion; GO:0051537,2 iron, 2 sulfur cluster binding; GO:0046872,metal ion binding; GO:0055072,iron ion homeostasis; GO:0010150,leaf senescence; GO:0072593,reactive oxygen species metabolic process; GO:0003674,molecular_function; GO:0005488,binding; GO:0048037,cofactor binding; GO:0051536,iron-sulfur cluster binding; GO:00515…	Iron-binding zinc finger CDGSH type	--	--	--
Cluster-1527.43102	19.51	17.3	33.38	4.03	15.2	3.71	936.34	836.67	1795.96	207.98	717.48	201.96	-1.6008	0.00154159	0.160819	1625	--	hypothetical protein PHYPA_018990 [Physcomitrella patens]	--	D8RAT1_SELML SubName: Full=Uncharacterized protein {ECO:0000313|EMBL:EFJ30367.1};	Inhibitor of type V adenylyl cyclases/Neuronal presynaptic protein Highwire/PAM/RPM-1	--	RING-type zinc-finger	--	--	--
Cluster-1527.66020	1.01	0.76	0.66	3.04	4.61	44.54	8	6	6	26	36	404	4.52232	1.3048e-06	0.00161462	460	--	--	--	--	--	--	Protein of unknown function (DUF3919)	--	--	--
Cluster-1527.28916	3.24	12.86	19.53	5.68	5.15	1.13	70.01	279.04	474.61	131.85	109.3	27.72	-1.59534	0.0144464	0.453184	857	--	--	--	--	--	--	Cytoskeletal adhesion	--	--	--
Cluster-1527.12274	3.49	1.7	3.34	1.46	0.65	0.75	49	24	53	22	9	12	-1.57521	0.00596889	0.331036	638	--	hypothetical protein BVRB_037930, partial [Beta vulgaris subsp. vulgaris]	--	A0A0J8BHP9_BETVU SubName: Full=Uncharacterized protein {ECO:0000313|EMBL:KMS65245.1}; Flags: Fragment;	--	--	--	--	--	--
Cluster-1527.35681	0.03	1.03	1.05	0.11	0.61	0	0.95	37.64	42.89	4.36	21.84	0	-1.57356	0.267158	0.899809	1284	K01674 carbonic anhydrase [EC:4.2.1.1] | (RefSeq) alpha carbonic anhydrase 7-like (A)	alpha carbonic anhydrase 7-like [Ananas comosus]	ATCA7_ARATH RecName: Full=Alpha carbonic anhydrase 7; Short=AtaCA7; Short=AtalphaCA7; EC=4.2.1.1; AltName: Full=Alpha carbonate dehydratase 7; Flags: Precursor;	R1DAV9_EMIHU SubName: Full=Alpha-type carbonic anhydrase {ECO:0000313|EMBL:EOD32568.1}; Flags: Fragment;	Carbonic anhydrase	GO:0009570,chloroplast stroma; GO:0004089,carbonate dehydratase activity; GO:0008270,zinc ion binding; GO:0006730,one-carbon metabolic process; GO:0003674,molecular_function; GO:0003824,catalytic activity; GO:0016829,lyase activity; GO:0016835,carbon-oxygen lyase activity; GO:0016836,hydro-lyase activity; GO:0005488,binding; GO:0046872,metal ion binding; GO:0043167,ion binding; GO:0043169,cation …	Eukaryotic-type carbonic anhydrase	--	--	--
Cluster-1527.24149	1.4	1.12	0	0.34	0.02	0.48	110.63	89.01	0	28.62	1.39	43.28	-1.5681	0.444117	0.951142	2531	K21867 potassium channel | (RefSeq) potassium channel KAT3 (A)	hypothetical protein GPECTOR_7g1007 [Gonium pectorale]	--	A0A1Q9D8D4_SYMMI SubName: Full=Potassium voltage-gated channel protein eag {ECO:0000313|EMBL:OLP91430.1};	--	GO:0016021,integral component of membrane; GO:0005216,ion channel activity; GO:0003674,molecular_function; GO:0005215,transporter activity; GO:0022857,transmembrane transporter activity; GO:0015075,ion transmembrane transporter activity; GO:0015267,channel activity; GO:0015318,inorganic molecular entity transmembrane transporter activity; GO:0022803,passive transmembrane transporter activity; GO:…	Ion transport protein	--	--	--
Cluster-1527.14157	0	0	0.28	2.06	1.08	3.05	0	0	8.76	60.66	29.2	94.67	4.40652	2.29912e-05	0.0112367	1026	--	--	--	A0A1Q9CYH3_SYMMI SubName: Full=Protein PAM68, chloroplastic {ECO:0000313|EMBL:OLP87979.1};	--	GO:0016021,integral component of membrane; GO:0005575,cellular_component; GO:0016020,membrane; GO:0031224,intrinsic component of membrane; GO:0044425,membrane part	Protein of unknown function (DUF3464)	--	--	--
Cluster-1527.59463	1.17	1.09	0	0.23	0.33	0.19	42.19	39.57	0	8.91	11.65	7.82	-1.56053	0.187619	0.853693	1276	--	--	--	--	--	--	Ankyrin repeats (3 copies)	--	--	--
Cluster-1527.25054	0.61	2.65	1.74	0	0.6	1.02	23.36	102.88	75.18	0	22.93	44.69	-1.54262	0.143254	0.810532	1352	--	--	--	A0A1Q9DG36_SYMMI SubName: Full=tRNA 2'-phosphotransferase 1 {ECO:0000313|EMBL:OLP94146.1};	--	GO:0004527,exonuclease activity; GO:0003676,nucleic acid binding; GO:0016772,transferase activity, transferring phosphorus-containing groups; GO:0004842,ubiquitin-protein transferase activity; GO:0006388,tRNA splicing, via endonucleolytic cleavage and ligation; GO:0003674,molecular_function; GO:0003824,catalytic activity; GO:0004518,nuclease activity; GO:0016787,hydrolase activity; GO:0016788,hyd…	--	--	--	--
Cluster-1527.11668	0	0.08	0.07	0.95	0.18	1.48	0	4.74	4.99	62.47	10.64	102.8	4.11051	3.33904e-05	0.0142793	2017	K03283 heat shock 70kDa protein 1/2/6/8 | (RefSeq) heat shock cognate 70 kDa protein 2 (A)	heat shock cognate 70 kDa protein 2-like [Dendrobium catenatum]	HSP7C_PETHY RecName: Full=Heat shock cognate 70 kDa protein;	A0A2I0X4M8_9ASPA SubName: Full=Heat shock cognate 70 kDa protein {ECO:0000313|EMBL:PKU82865.1};	Molecular chaperones HSP70/HSC70, HSP70 superfamily	GO:0005524,ATP binding; GO:0000166,nucleotide binding; GO:0003674,molecular_function; GO:0005488,binding; GO:0008144,drug binding; GO:0017076,purine nucleotide binding; GO:0030554,adenyl nucleotide binding; GO:0032553,ribonucleotide binding; GO:0032555,purine ribonucleotide binding; GO:0032559,adenyl ribonucleotide binding; GO:0035639,purine ribonucleoside triphosphate binding; GO:0036094,small m…	Hsp70 protein	--	--	--
Cluster-1527.63825	0.64	0.61	0.24	0.2	0.3	0.03	41.61	40.07	17.52	13.83	19.19	2.29	-1.54145	0.0585215	0.677103	2119	--	--	--	--	--	--	RNA recognition motif 2	--	--	--
Cluster-1527.48342	2.34	1.44	1.14	1.15	0.58	0	96.27	59.84	52.92	51.1	23.5	0	-1.54044	0.115429	0.778315	1428	--	predicted protein [Physcomitrella patens]	EDR2_ARATH RecName: Full=Protein ENHANCED DISEASE RESISTANCE 2;	A0A1Q9DTF2_SYMMI SubName: Full=StAR-related lipid transfer protein 7, mitochondrial {ECO:0000313|EMBL:OLP98431.1};	START domain-containing proteins involved in steroidogenesis/phosphatidylcholine transfer	GO:0005789,endoplasmic reticulum membrane; GO:0010008,endosome membrane; GO:0016021,integral component of membrane; GO:0005886,plasma membrane; GO:0008289,lipid binding; GO:0070273,phosphatidylinositol-4-phosphate binding; GO:0009873,ethylene-activated signaling pathway; GO:1900056,negative regulation of leaf senescence; GO:0009626,plant-type hypersensitive response; GO:1900150,regulation of defe…	START domain	--	--	--
Cluster-1527.16352	0.96	1.26	1.23	0.62	0.59	0	65.05	86.43	93.9	45.45	39.68	0	-1.53772	0.102656	0.762625	2204	K12823 ATP-dependent RNA helicase DDX5/DBP2 [EC:3.6.4.13] | (RefSeq) DEAD-box ATP-dependent RNA helicase 20-like (A)	DEAD-box ATP-dependent RNA helicase 20-like [Manihot esculenta]	RH30_ARATH RecName: Full=DEAD-box ATP-dependent RNA helicase 30; EC=3.6.4.13;	A0A2C9VS56_MANES SubName: Full=Uncharacterized protein {ECO:0000313|EMBL:OAY47836.1};	ATP-dependent RNA helicase	GO:0005737,cytoplasm; GO:0005730,nucleolus; GO:0005524,ATP binding; GO:0004004,ATP-dependent RNA helicase activity; GO:0003729,mRNA binding; GO:0000184,nuclear-transcribed mRNA catabolic process, nonsense-mediated decay; GO:0010501,RNA secondary structure unwinding; GO:0006364,rRNA processing; GO:0000166,nucleotide binding; GO:0003674,molecular_function; GO:0005488,binding; GO:0008144,drug bindin…	DEAD/DEAH box helicase	--	--	--
Cluster-1527.12347	45.37	20.04	43.61	8.97	11.87	16.37	183	80	205	39	47	76	-1.52342	0.000575951	0.0872326	345	--	orf187 (mitochondrion) [Bupleurum falcatum]	--	R4ITY7_VICFA SubName: Full=Uncharacterized protein {ECO:0000313|EMBL:AGC78945.1};	--	GO:0005739,mitochondrion; GO:0005622,intracellular; GO:0005575,cellular_component; GO:0005623,cell; GO:0005737,cytoplasm; GO:0043231,intracellular membrane-bounded organelle; GO:0043226,organelle; GO:0043227,membrane-bounded organelle; GO:0043229,intracellular organelle; GO:0044424,intracellular part; GO:0044444,cytoplasmic part; GO:0044464,cell part	--	--	--	--
Cluster-1527.41669	1.91	0	1.79	1.12	0	0.19	66.86	0	70.33	42.13	0.01	7.65	-1.52341	0.54244	0.970074	1248	--	--	--	--	--	--	--	--	--	--
Cluster-1527.27017	20.78	8.47	23.44	4.3	6.28	7.36	138	56.03	178.37	30.79	41	55.9	-1.52253	0.00148181	0.156127	422	K03046 DNA-directed RNA polymerase subunit beta' [EC:2.7.7.6] | (RefSeq) uncharacterized protein LOC108945874 (A)	hypothetical protein LSAT_4X50261 [Lactuca sativa]	--	A0A078JF44_BRANA SubName: Full=BnaUnng00870D protein {ECO:0000313|EMBL:CDY63600.1};	--	--	--	--	--	--
Cluster-1527.11363	6.75	4.66	6.64	1.73	2.01	2.45	58	40	65	16	17	24	-1.52039	0.000732195	0.102445	479	--	hypothetical protein BVRB_037930, partial [Beta vulgaris subsp. vulgaris]	--	A0A0J8BHP9_BETVU SubName: Full=Uncharacterized protein {ECO:0000313|EMBL:KMS65245.1}; Flags: Fragment;	--	--	--	--	--	--
Cluster-1527.19490	0.43	1.01	0.53	0.05	0	0.6	31.65	74.76	43.72	3.94	0	50.05	-1.51847	0.195366	0.859872	2362	--	--	--	R1G3W2_EMIHU SubName: Full=Uncharacterized protein {ECO:0000313|EMBL:EOD40514.1, ECO:0000313|EnsemblProtists:EOD40514};	--	GO:0016021,integral component of membrane; GO:0005575,cellular_component; GO:0016020,membrane; GO:0031224,intrinsic component of membrane; GO:0044425,membrane part	--	--	--	--
Cluster-1527.83679	1.04	0.84	2.65	0.42	0.96	0.21	38.85	31.63	110.76	16.71	35	8.98	-1.51771	0.0268613	0.553992	1312	--	--	--	--	--	--	Phytanoyl-CoA dioxygenase (PhyH)	--	--	--
Cluster-1527.82084	0.82	0.76	0.61	0.21	0.57	0	38.76	36.16	32.32	10.9	26.41	0	-1.5137	0.129925	0.795742	1610	--	--	--	A0A1Q9DGC4_SYMMI SubName: Full=Extracellular protease {ECO:0000313|EMBL:OLP94228.1};	--	GO:0004222,metalloendopeptidase activity; GO:0003674,molecular_function; GO:0003824,catalytic activity; GO:0004175,endopeptidase activity; GO:0008237,metallopeptidase activity; GO:0008233,peptidase activity; GO:0070011,peptidase activity, acting on L-amino acid peptides; GO:0016787,hydrolase activity; GO:0140096,catalytic activity, acting on a protein	Lysine-specific metallo-endopeptidase	--	--	--
Cluster-1527.60235	0.52	1.6	0.9	0	0	0.98	57.02	178.49	110.44	0	0	122.66	-1.51195	0.569694	0.973094	3436	K10393 kinesin family member 2/24 | (RefSeq) kinesin motor domain (A)	kinesin motor domain [Micromonas pusilla CCMP1545]	DSK1_CYLFU RecName: Full=Diatom spindle kinesin-1;	L1JGG6_GUITH RecName: Full=Kinesin-like protein {ECO:0000256|RuleBase:RU000394};	Kinesin-like protein	GO:0005737,cytoplasm; GO:0005874,microtubule; GO:0005524,ATP binding; GO:0008017,microtubule binding; GO:0003777,microtubule motor activity; GO:0007018,microtubule-based movement; GO:0000166,nucleotide binding; GO:0003674,molecular_function; GO:0005488,binding; GO:0008144,drug binding; GO:0017076,purine nucleotide binding; GO:0030554,adenyl nucleotide binding; GO:0032553,ribonucleotide binding; G…	UPF0688 family	--	--	--
Cluster-1527.74527	15.28	3.82	14.32	4.2	3.82	3.65	146.48	36.65	156.07	43.33	35.98	39.85	-1.50814	0.00413011	0.276737	508	K02108 F-type H+-transporting ATPase subunit a | (RefSeq) uncharacterized protein LOC110266878 (A)	hypothetical protein BVRB_041110, partial [Beta vulgaris subsp. vulgaris]	--	A0A0J7YMY6_BETVU SubName: Full=Uncharacterized protein {ECO:0000313|EMBL:KMS64936.1}; Flags: Fragment;	--	--	--	--	--	--
Cluster-1527.68583	1.78	2.19	1.44	0.73	0.38	0.73	37.53	46.29	34.13	16.64	7.92	17.52	-1.49486	0.00477491	0.301203	842	--	--	--	--	--	--	--	--	--	--
Cluster-1527.69776	1.27	0.95	1.72	0.69	0	0.68	69.48	52.22	105.52	40.9	0	42.32	-1.49378	0.113356	0.775805	1821	--	predicted protein [Hordeum vulgare subsp. vulgare]	--	F2DST9_HORVV SubName: Full=Predicted protein {ECO:0000313|EMBL:BAJ98160.1};	--	--	PA14 domain	--	--	--
Cluster-1527.5026	4.27	8.15	15.94	2.78	3.77	3.49	30	57	128	21	26	28	-1.48576	0.0087269	0.378491	433	K01193 beta-fructofuranosidase [EC:3.2.1.26] | (RefSeq) Glycosyl hydrolases family 32 protein (A)	At1g62660/F23N19_3 [Arabidopsis thaliana]	INVA3_ARATH RecName: Full=Acid beta-fructofuranosidase 3, vacuolar {ECO:0000303|PubMed:9332372}; Short=At beta fruct3 {ECO:0000303|PubMed:9332372}; Short=AtBETAFRUCT3 {ECO:0000303|PubMed:9332372}; EC=3.2.1.26 {ECO:0000255|PROSITE-ProRule:PRU10067}; AltName: Full=Acid invertase 3 {ECO:0000303|PubMed:9332372}; Short=AI 3 {ECO:0000303|PubMed:9332372}; AltName: Full=Acid sucrose hydrolase 3 {ECO:0000…	R1D5B3_EMIHU SubName: Full=Uncharacterized protein {ECO:0000313|EMBL:EOD06076.1, ECO:0000313|EnsemblProtists:EOD06076};	Beta-fructofuranosidase (invertase)	GO:0016021,integral component of membrane; GO:0000325,plant-type vacuole; GO:0005775,vacuolar lumen; GO:0005773,vacuole; GO:0004575,sucrose alpha-glucosidase activity; GO:0009738,abscisic acid-activated signaling pathway; GO:0071370,cellular response to gibberellin stimulus; GO:0009617,response to bacterium; GO:0005985,sucrose metabolic process; GO:0003674,molecular_function; GO:0003824,catalytic…	Glycosyl hydrolases family 32 N-terminal domain	--	--	--
Cluster-1527.70296	1.8	0	3.94	0	0.76	1.2	65.84	0	161.55	0	27.32	49.9	-1.47787	0.570037	0.973094	1292	--	hypothetical protein BE221DRAFT_79170 [Ostreococcus tauri]	--	R1BMW1_EMIHU SubName: Full=Uncharacterized protein {ECO:0000313|EMBL:EOD11318.1, ECO:0000313|EnsemblProtists:EOD11318};	--	--	YHYH protein	--	--	--
Cluster-1527.66584	19.67	8.94	24.09	8.48	7.95	2.93	58	26	84	27	23	10	-1.47751	0.012686	0.433754	312	--	--	--	--	--	--	--	--	--	--
Cluster-1527.57290	2.48	3.19	3.8	1.43	0	1.91	56.86	73.73	98.08	35.32	0	49.66	-1.47187	0.119628	0.782917	897	--	--	--	--	--	--	MORN repeat	--	--	--
Cluster-1527.42931	3.48	0.82	3.72	1.4	0.78	0.7	326.94	77.34	390.63	141.67	72.23	74.61	-1.46959	0.00510174	0.310462	2959	K05658 ATP-binding cassette, subfamily B (MDR/TAP), member 1 [EC:7.6.2.2] | (RefSeq) ABC transporter B family member 9-like (A)	PREDICTED: ABC transporter B family member 9-like isoform X2 [Solanum lycopersicum]	AB15B_ARATH RecName: Full=ABC transporter B family member 15; Short=ABC transporter ABCB.15; Short=AtABCB15; AltName: Full=Multidrug resistance protein 13; AltName: Full=P-glycoprotein 15;	A0A1Q9CI49_SYMMI SubName: Full=Sulfate/thiosulfate import ATP-binding protein CysA {ECO:0000313|EMBL:OLP82527.1};	Multidrug/pheromone exporter, ABC superfamily	GO:0016021,integral component of membrane; GO:0005886,plasma membrane; GO:0005524,ATP binding; GO:0042626,ATPase activity, coupled to transmembrane movement of substances; GO:0000166,nucleotide binding; GO:0003674,molecular_function; GO:0005488,binding; GO:0008144,drug binding; GO:0017076,purine nucleotide binding; GO:0030554,adenyl nucleotide binding; GO:0032553,ribonucleotide binding; GO:003255…	Calx-beta domain	--	--	--
Cluster-1527.40403	5.53	2.28	2.4	0.62	0	2.89	266.63	110.52	129.5	31.89	0	157.98	-1.46728	0.404844	0.942342	1631	K22745 apoptosis-inducing factor 2 | (RefSeq) apoptosis-inducing factor homolog A-like (A)	PREDICTED: apoptosis-inducing factor homolog A-like [Lupinus angustifolius]	--	A0A1Q9ET66_SYMMI SubName: Full=Apoptosis-inducing factor-like A {ECO:0000313|EMBL:OLQ10605.1};	NADH-dehydrogenase (ubiquinone)	GO:0016491,oxidoreductase activity; GO:0003674,molecular_function; GO:0003824,catalytic activity	Pyridine nucleotide-disulphide oxidoreductase	--	--	--
Cluster-1527.34575	1.26	1.61	1.49	7.63	4.85	38.6	18	23	24	117	68	626	3.62259	3.13838e-07	0.000608428	644	K12462 Rho GDP-dissociation inhibitor | (RefSeq) rho GDP-dissociation inhibitor 1-like (A)	PREDICTED: rho GDP-dissociation inhibitor 1-like [Gossypium arboreum]	GDIR_ARATH RecName: Full=Rho GDP-dissociation inhibitor 1; Short=AtRhoGDI1; Short=Rho GDI-1;	L1J5S2_GUITH SubName: Full=Uncharacterized protein {ECO:0000313|EMBL:EKX43430.1, ECO:0000313|EnsemblProtists:EKX43430};	Rho GDP-dissociation inhibitor	GO:0005737,cytoplasm; GO:0005096,GTPase activator activity; GO:0005094,Rho GDP-dissociation inhibitor activity; GO:0009932,cell tip growth; GO:0010053,root epidermal cell differentiation; GO:0003674,molecular_function; GO:0008047,enzyme activator activity; GO:0098772,molecular function regulator; GO:0030234,enzyme regulator activity; GO:0030695,GTPase regulator activity; GO:0060589,nucleoside-tri…	RHO protein GDP dissociation inhibitor	--	--	--
Cluster-1527.78748	2.8	2.65	0.72	10.41	7.22	53.01	17	16	5	68	43	368	3.60315	7.61259e-06	0.00539937	405	K05759 profilin | (RefSeq) profilin-4 (A)	profilin-4 [Sorghum bicolor]	PROF2_SOYBN RecName: Full=Profilin-2; AltName: Full=GmPRO2; AltName: Allergen=Gly m 3.0102;	C5Z4B6_SORBI RecName: Full=Profilin {ECO:0000256|RuleBase:RU003909};	Profilin	GO:0015629,actin cytoskeleton; GO:0005938,cell cortex; GO:0003785,actin monomer binding; GO:0042989,sequestering of actin monomers; GO:0005515,protein binding; GO:0003674,molecular_function; GO:0003779,actin binding; GO:0005488,binding; GO:0008092,cytoskeletal protein binding; GO:0030036,actin cytoskeleton organization; GO:0030832,regulation of actin filament length; GO:0007010,cytoskeleton organ…	Profilin	--	--	--
Cluster-1527.24394	4.06	1.74	7.82	2.69	0	2.21	108.18	46.51	234.13	77.13	0.01	66.72	-1.4574	0.374036	0.93376	1004	--	--	--	A0A1Q9DJK6_SYMMI SubName: Full=Pentatricopeptide repeat-containing protein, chloroplastic {ECO:0000313|EMBL:OLP95349.1};	--	GO:0003677,DNA binding; GO:0005506,iron ion binding; GO:0031418,L-ascorbic acid binding; GO:0016705,oxidoreductase activity, acting on paired donors, with incorporation or reduction of molecular oxygen; GO:0015074,DNA integration; GO:0006310,DNA recombination; GO:0003674,molecular_function; GO:0003676,nucleic acid binding; GO:0005488,binding; GO:0097159,organic cyclic compound binding; GO:1901363…	--	--	--	--
Cluster-1527.42387	11.02	14.67	9.38	5.92	6.98	0.25	257.65	344.63	246.54	148.89	160.4	6.58	-1.44474	0.175916	0.843329	909	--	--	--	--	--	--	--	--	--	--
Cluster-1527.29605	2.44	0.85	2.83	0.62	0	1.56	63.71	22.26	82.93	17.31	0	46.21	-1.43952	0.169294	0.835834	988	--	predicted protein [Micromonas pusilla CCMP1545]	--	C1N6Q2_MICPC SubName: Full=Predicted protein {ECO:0000313|EMBL:EEH52146.1};	--	--	SPFH domain / Band 7 family	--	--	--
Cluster-1527.6677	0.16	0.68	0.21	1.68	1.18	7.75	4	17	6	45	29	219	3.39949	6.56705e-05	0.0215785	954	K24028 salicylic acid 3-hydroxylase [EC:1.14.11.-] | (RefSeq) protein DMR6-LIKE OXYGENASE 2 (A)	Oxoglutarate/iron-dependent dioxygenase [Ostreococcus tauri]	DIOX3_ARATH RecName: Full=Probable 2-oxoglutarate-dependent dioxygenase JRG21 {ECO:0000305}; EC=1.14.11.- {ECO:0000305}; AltName: Full=Protein JASMONATE-REGULATED GENE 21 {ECO:0000303|PubMed:15098125};	A0A1Y5I0D0_OSTTA SubName: Full=Oxidoreductase iron/ascorbate family {ECO:0000313|EMBL:OUS43001.1};	Iron/ascorbate family oxidoreductases	GO:0051213,dioxygenase activity; GO:0120091,jasmonic acid hydrolase; GO:0046872,metal ion binding; GO:0009813,flavonoid biosynthetic process; GO:2000022,regulation of jasmonic acid mediated signaling pathway; GO:0003674,molecular_function; GO:0003824,catalytic activity; GO:0016491,oxidoreductase activity; GO:0016787,hydrolase activity; GO:0016810,hydrolase activity, acting on carbon-nitrogen (but…	non-haem dioxygenase in morphine synthesis N-terminal	--	--	--
Cluster-1527.66371	11.57	6.31	11.36	2.2	3.93	4.63	39	21	45	8	13	18	-1.4198	0.0172527	0.485953	325	--	Metal transporter Nramp5 [Morus notabilis]	--	A0A0V0I6N3_SOLCH SubName: Full=Putative ovule protein {ECO:0000313|EMBL:JAP28316.1};	--	--	--	--	--	--
Cluster-1527.25927	0.06	0.37	0.65	0	0.12	0.26	6.83	42.03	81.85	0	13.15	33.7	-1.41937	0.229554	0.88091	3498	--	PREDICTED: U-box domain-containing protein 12-like [Nelumbo nucifera]	--	A0A1U8ARJ9_NELNU SubName: Full=U-box domain-containing protein 12-like {ECO:0000313|RefSeq:XP_010265630.1};	--	--	Armadillo/beta-catenin-like repeat	--	--	--
Cluster-1527.28766	11.78	3.48	12.46	3.45	2.96	4.04	50.66	14.83	62.31	16	12.49	20	-1.41216	0.0254405	0.545018	353	--	--	--	--	--	--	Putative flagellar	--	--	--
Cluster-1527.3162	2.27	1.71	1.8	1.54	0.57	0.12	93.71	71.18	83.49	68.22	23.04	5.56	-1.41211	0.0404019	0.613152	1430	K00592 [ribulose-bisphosphate carboxylase]/[fructose-bisphosphate aldolase]-lysine N-methyltransferase [EC:2.1.1.127 2.1.1.259] | (RefSeq) fructose-bisphosphate aldolase-lysine N-methyltransferase, chloroplastic (A)	PREDICTED: fructose-bisphosphate aldolase-lysine N-methyltransferase, chloroplastic [Brachypodium distachyon]	--	R1DGD2_EMIHU SubName: Full=Uncharacterized protein {ECO:0000313|EMBL:EOD13560.1, ECO:0000313|EnsemblProtists:EOD13560};	N-methyltransferase	--	SET domain	SET	TR	SET
Cluster-1527.77031	1.59	2.5	1.5	11.62	6.36	36.76	14	22	15	110	55	369	3.35448	3.85606e-07	0.000679601	485	K05765 cofilin | (RefSeq) actin-depolymerizing factor (A)	predicted protein [Hordeum vulgare subsp. vulgare]	ADF8_ARATH RecName: Full=Actin-depolymerizing factor 8; Short=ADF-8; Short=AtADF8;	F2E1N6_HORVV SubName: Full=Predicted protein {ECO:0000313|EMBL:BAK01258.1};	Actin depolymerizing factor	GO:0015629,actin cytoskeleton; GO:0005737,cytoplasm; GO:0003779,actin binding; GO:0030042,actin filament depolymerization; GO:0005515,protein binding; GO:0003674,molecular_function; GO:0005488,binding; GO:0008092,cytoskeletal protein binding; GO:0030036,actin cytoskeleton organization; GO:0007010,cytoskeleton organization; GO:0006996,organelle organization; GO:0007015,actin filament organization;…	Cofilin/tropomyosin-type actin-binding protein	--	--	--
Cluster-1527.74525	4.05	1.57	3.15	0.83	1.03	1.4	56.9	22.06	49.97	12.6	14.21	22.37	-1.40135	0.0140343	0.449366	638	--	hypothetical protein BVRB_025610 [Beta vulgaris subsp. vulgaris]	YCX91_PHAAO RecName: Full=Uncharacterized protein ORF91;	A0A0J8AZ36_BETVU SubName: Full=Uncharacterized protein {ECO:0000313|EMBL:KMS94019.1};	--	GO:0009507,chloroplast; GO:0005622,intracellular; GO:0005575,cellular_component; GO:0005623,cell; GO:0005737,cytoplasm; GO:0043231,intracellular membrane-bounded organelle; GO:0009536,plastid; GO:0043226,organelle; GO:0043227,membrane-bounded organelle; GO:0043229,intracellular organelle; GO:0044424,intracellular part; GO:0044444,cytoplasmic part; GO:0044464,cell part	--	--	--	--
Cluster-1527.43673	8.88	1.85	7.17	0.03	6.73	0	360.11	75.5	325.99	1.19	268.29	0	-1.39629	0.555637	0.971216	1408	--	--	--	--	--	--	Caspase domain	--	--	--
Cluster-1527.784	0.62	0.21	0.23	1.97	2.1	6.1	12	4	5	41	40	134	3.32934	5.06334e-06	0.00414766	792	K02937 large subunit ribosomal protein L7e | (GenBank) 60S ribosomal protein L7 (A)	hypothetical protein AQUCO_02500058v1 [Aquilegia coerulea]	RL72_ARATH RecName: Full=60S ribosomal protein L7-2;	A0A2D4BFA6_PYTIN SubName: Full=Uncharacterized protein {ECO:0000313|EMBL:GAX93047.1};	60S ribosomal protein L7	GO:0005618,cell wall; GO:0009507,chloroplast; GO:0005829,cytosol; GO:0022625,cytosolic large ribosomal subunit; GO:0022626,cytosolic ribosome; GO:0016020,membrane; GO:0005886,plasma membrane; GO:0042788,polysomal ribosome; GO:0005774,vacuolar membrane; GO:0005773,vacuole; GO:0003729,mRNA binding; GO:0003723,RNA binding; GO:0003735,structural constituent of ribosome; GO:0002181,cytoplasmic transla…	Ribosomal protein L30p/L7e	--	--	--
Cluster-1527.66657	5.67	26.71	4.77	1.42	4.68	7.61	205.21	973.47	193.62	55.37	166.74	312.32	-1.39252	0.166268	0.834283	1282	K01624 fructose-bisphosphate aldolase, class II [EC:4.1.2.13] | (RefSeq) Fructose-bisphosphate aldolase, class II,yeast/E. coli subtype (A)	hypothetical protein CEUSTIGMA_g5534.t1 [Chlamydomonas eustigma]	--	X2D8N9_LINPO SubName: Full=Class II fructose-1,6-bisphosphate aldolase {ECO:0000313|EMBL:AHK23681.1}; EC=4.1.2.13 {ECO:0000313|EMBL:AHK23681.1};	Fructose 1,6-bisphosphate aldolase	GO:0004332,fructose-bisphosphate aldolase activity; GO:0008270,zinc ion binding; GO:0006096,glycolytic process; GO:0003674,molecular_function; GO:0003824,catalytic activity; GO:0016829,lyase activity; GO:0016830,carbon-carbon lyase activity; GO:0016832,aldehyde-lyase activity; GO:0005488,binding; GO:0046872,metal ion binding; GO:0043167,ion binding; GO:0043169,cation binding; GO:0046914,transitio…	Fructose-bisphosphate aldolase class-II	--	--	--
Cluster-1527.46438	25.82	14.5	23.32	5.98	13.39	4.8	1663	941	1682	414	848	350	-1.38639	0.000322858	0.0611642	2102	K02112 F-type H+/Na+-transporting ATPase subunit beta [EC:7.1.2.2 7.2.2.1] | (RefSeq) atpB, HebrCp048; ATP synthase CF1 beta subunit (A)	ATP synthase beta subunit, partial (chloroplast) [Cyananthus inflatus]	ATPB_EUGGR RecName: Full=ATP synthase subunit beta, chloroplastic {ECO:0000255|HAMAP-Rule:MF_01347}; EC=3.6.3.14 {ECO:0000255|HAMAP-Rule:MF_01347}; AltName: Full=ATP synthase F1 sector subunit beta {ECO:0000255|HAMAP-Rule:MF_01347}; AltName: Full=F-ATPase subunit beta {ECO:0000255|HAMAP-Rule:MF_01347};	A0A0A0N2N8_9DINO RecName: Full=ATP synthase subunit beta {ECO:0000256|RuleBase:RU003553}; EC=3.6.3.14 {ECO:0000256|RuleBase:RU003553};	F0F1-type ATP synthase, beta subunit	GO:0009535,chloroplast thylakoid membrane; GO:0045261,proton-transporting ATP synthase complex, catalytic core F(1); GO:0005524,ATP binding; GO:0046933,proton-transporting ATP synthase activity, rotational mechanism; GO:0015986,ATP synthesis coupled proton transport; GO:0000166,nucleotide binding; GO:0003674,molecular_function; GO:0005488,binding; GO:0008144,drug binding; GO:0017076,purine nucleo…	ATP synthase alpha/beta family, nucleotide-binding domain	--	--	--
Cluster-1527.78398	0	0.91	1.64	0	0.96	0	0	68.6	136.48	0	70.58	0	-1.3839	0.710626	0.983619	2395	--	--	--	A0A1Q9D1S1_SYMMI RecName: Full=Poly [ADP-ribose] polymerase {ECO:0000256|RuleBase:RU362114}; Short=PARP {ECO:0000256|RuleBase:RU362114}; EC=2.4.2.30 {ECO:0000256|RuleBase:RU362114};	--	GO:0003950,NAD+ ADP-ribosyltransferase activity; GO:0003674,molecular_function; GO:0003824,catalytic activity; GO:0016740,transferase activity; GO:0016757,transferase activity, transferring glycosyl groups; GO:0016763,transferase activity, transferring pentosyl groups	Poly(ADP-ribose) polymerase catalytic domain	--	--	--
Cluster-1527.77019	0.55	0.95	0.65	5.12	2.78	11.91	12	21	16	121	60	297	3.25537	5.52583e-08	0.000153039	868	--	--	--	--	--	--	--	--	--	--
Cluster-1527.84524	3.86	4.33	5.02	1.05	1.72	2.29	31.75	35.5	46.97	9.26	13.87	21.49	-1.38258	0.0103772	0.401822	468	K02639 ferredoxin | (RefSeq) ferredoxin-like isoform X1 (A)	PREDICTED: ferredoxin-like isoform X1 [Daucus carota subsp. sativus]	FER_PERBI RecName: Full=Ferredoxin;	A7YXI8_ALEFU RecName: Full=Ferredoxin {ECO:0000256|RuleBase:RU364001};	--	GO:0009507,chloroplast; GO:0051537,2 iron, 2 sulfur cluster binding; GO:0009055,electron transfer activity; GO:0046872,metal ion binding; GO:0003674,molecular_function; GO:0005488,binding; GO:0048037,cofactor binding; GO:0051536,iron-sulfur cluster binding; GO:0051540,metal cluster binding; GO:0003824,catalytic activity; GO:0016491,oxidoreductase activity; GO:0043167,ion binding; GO:0043169,catio…	2Fe-2S iron-sulfur cluster binding domain	--	--	--
Cluster-1527.11941	1.18	0.95	1.78	1.55	0	0	31.49	25.51	53.38	44.55	0	0	-1.38211	0.550322	0.970909	1007	--	--	--	A0A1Q9CTL2_SYMMI RecName: Full=Poly [ADP-ribose] polymerase {ECO:0000256|RuleBase:RU362114}; Short=PARP {ECO:0000256|RuleBase:RU362114}; EC=2.4.2.30 {ECO:0000256|RuleBase:RU362114}; EC=3.2.1.- {ECO:0000256|RuleBase:RU000489};	--	GO:0005576,extracellular region; GO:0016021,integral component of membrane; GO:0008061,chitin binding; GO:0020037,heme binding; GO:0004553,hydrolase activity, hydrolyzing O-glycosyl compounds; GO:0046872,metal ion binding; GO:0003950,NAD+ ADP-ribosyltransferase activity; GO:0016491,oxidoreductase activity; GO:0031625,ubiquitin protein ligase binding; GO:0005975,carbohydrate metabolic process; GO:…	Poly(ADP-ribose) polymerase catalytic domain	--	--	--
Cluster-1527.28467	0	1.41	2.37	0	0	1.36	0	36.01	67.74	0	0	39.38	-1.37886	0.705077	0.982935	970	--	--	--	A0A1Q9F473_SYMMI SubName: Full=Putative transporter {ECO:0000313|EMBL:OLQ14457.1};	--	GO:0016021,integral component of membrane; GO:0008324,cation transmembrane transporter activity; GO:0006813,potassium ion transport; GO:0003674,molecular_function; GO:0005215,transporter activity; GO:0022857,transmembrane transporter activity; GO:0015075,ion transmembrane transporter activity; GO:0006810,transport; GO:0006811,ion transport; GO:0006812,cation transport; GO:0030001,metal ion transp…	--	--	--	--
Cluster-1527.75225	0.04	0.26	0.3	0	0.15	0.07	7.62	56.74	72.13	0	31.75	17.66	-1.3759	0.231192	0.882116	6543	--	--	--	A0A1Q9DVP5_SYMMI SubName: Full=Uncharacterized protein {ECO:0000313|EMBL:OLP99255.1};	--	--	F5/8 type C domain	--	--	--
Cluster-1527.11554	1.43	1.31	1.09	0.23	1.27	0	51.66	47.74	44.19	8.91	45.27	0	-1.36886	0.203121	0.865205	1281	--	--	--	--	--	--	--	--	--	--
Cluster-1527.76293	0.8	0.61	0.49	2.52	4.13	9.8	13	10	9	44	66	181	3.17024	7.44917e-07	0.00103153	702	K02995 small subunit ribosomal protein S8e | (RefSeq) 40S ribosomal protein S8 (A)	hypothetical protein CEUSTIGMA_g9295.t1 [Chlamydomonas eustigma]	RS82_ARATH RecName: Full=40S ribosomal protein S8-2;	A0A067BUX3_SAPPC RecName: Full=40S ribosomal protein S8 {ECO:0000256|RuleBase:RU000669};	40S ribosomal protein S8	GO:0022626,cytosolic ribosome; GO:0022627,cytosolic small ribosomal subunit; GO:0016020,membrane; GO:0003735,structural constituent of ribosome; GO:0000462,maturation of SSU-rRNA from tricistronic rRNA transcript (SSU-rRNA, 5.8S rRNA, LSU-rRNA); GO:0006412,translation; GO:0003674,molecular_function; GO:0005198,structural molecule activity; GO:0042254,ribosome biogenesis; GO:0008152,metabolic proc…	Ribosomal protein S8e	--	--	--
Cluster-1527.56354	1.99	1.37	1.66	0	1.82	0.11	66.32	46.14	62.02	0	59.59	4.26	-1.36083	0.251792	0.893976	1199	--	--	--	--	--	--	--	--	--	--
Cluster-1527.31761	0.55	1.5	1.65	0.66	0.7	0.11	25.54	70.84	86.36	33.45	32.3	5.73	-1.35911	0.0509545	0.651783	1590	--	arad-like aldolase/epimerase, partial [Coccomyxa subellipsoidea C-169]	--	A0A196SM40_BLAHN SubName: Full=Aldolase {ECO:0000313|EMBL:OAO17346.1};	Cytoskeletal protein Adducin	--	Class II Aldolase and Adducin N-terminal domain	--	--	--
Cluster-1527.57167	0.48	0.26	0.5	1.89	1.01	7.72	11	6	13	47	23	202	3.16946	6.7434e-05	0.0219104	900	K15040 voltage-dependent anion channel protein 2 | (RefSeq) mitochondrial outer membrane protein porin 4 (A)	mitochondrial outer membrane protein porin 4 [Setaria italica]	VDAC1_WHEAT RecName: Full=Mitochondrial outer membrane porin; AltName: Full=Voltage-dependent anion-selective channel protein; Short=VDAC;	K3XK67_SETIT SubName: Full=Uncharacterized protein {ECO:0000313|EMBL:KQL06706.1, ECO:0000313|EnsemblPlants:Si002290m};	--	GO:0005741,mitochondrial outer membrane; GO:0046930,pore complex; GO:0015288,porin activity; GO:0008308,voltage-gated anion channel activity; GO:0003674,molecular_function; GO:0005215,transporter activity; GO:0022857,transmembrane transporter activity; GO:0015267,channel activity; GO:0022803,passive transmembrane transporter activity; GO:0022829,wide pore channel activity; GO:0005216,ion channel …	Eukaryotic porin	--	--	--
Cluster-1527.24334	1.91	2.3	3.22	1	1.17	0.74	48	58	91	27	29	21	-1.34905	0.00144166	0.153566	960	--	--	--	--	--	--	--	--	--	--
Cluster-1527.53778	1.21	0.14	0.48	0.13	0	0.56	77.08	9.12	34.3	8.95	0	40.33	-1.33481	0.2669	0.899809	2074	K12244 [Skp1-protein]-hydroxyproline N-acetylglucosaminyltransferase [EC:2.4.1.229] | (RefSeq) hypothetical protein (A)	hypothetical protein KFL_000650320 [Klebsormidium nitens]	--	R1BFT5_EMIHU SubName: Full=Uncharacterized protein {ECO:0000313|EMBL:EOD08593.1, ECO:0000313|EnsemblProtists:EOD08593};	--	--	Glycosyltransferase (GlcNAc)	--	--	--
Cluster-1527.36361	4.05	4.32	2.88	1.61	0.44	2.34	173.83	186.55	138.56	74.11	18.73	113.62	-1.32461	0.0132797	0.440618	1477	--	--	--	A0A1Q9F594_SYMMI SubName: Full=Uncharacterized protein {ECO:0000313|EMBL:OLQ14822.1};	--	GO:0046872,metal ion binding; GO:0003674,molecular_function; GO:0005488,binding; GO:0043167,ion binding; GO:0043169,cation binding	--	--	--	--
Cluster-1527.9397	6.44	1.2	5.28	1.57	0.99	2.46	300.94	56.46	276.6	78.9	45.5	129.96	-1.32343	0.023755	0.533847	1588	--	--	--	--	--	--	DNA/RNA non-specific endonuclease	--	--	--
Cluster-1527.12308	1.16	1.28	1.64	0.85	0.38	0.4	64.05	71.01	101.2	50.39	20.71	25.17	-1.32275	0.00204899	0.187079	1835	--	--	--	A0A1Q9EIH5_SYMMI SubName: Full=Calcium-dependent protein kinase 2 {ECO:0000313|EMBL:OLQ07178.1};	--	GO:0005524,ATP binding; GO:0004672,protein kinase activity; GO:0000166,nucleotide binding; GO:0003674,molecular_function; GO:0005488,binding; GO:0008144,drug binding; GO:0017076,purine nucleotide binding; GO:0030554,adenyl nucleotide binding; GO:0032553,ribonucleotide binding; GO:0032555,purine ribonucleotide binding; GO:0032559,adenyl ribonucleotide binding; GO:0035639,purine ribonucleoside trip…	50S ribosome-binding GTPase	--	--	--
Cluster-1527.38204	0.01	4.44	3.01	0.42	0.08	2.34	0.38	182.2	137.25	18.17	3.34	108.1	-1.32262	0.529489	0.967609	1413	--	--	--	--	--	--	--	--	--	--
Cluster-1527.63978	0.12	0.24	1.03	0.14	0.12	0.27	17.65	36.94	176.88	23.44	18.77	47.56	-1.31174	0.0916099	0.745364	4689	K24729 cilia- and flagella-associated protein 57 | (RefSeq) cilia- and flagella-associated protein 57-like isoform X1 (A)	hypothetical protein KFL_001060010 [Klebsormidium nitens]	--	A0A1Q9E0L4_SYMMI SubName: Full=WD repeat-containing protein 65 {ECO:0000313|EMBL:OLQ00953.1};	--	GO:0003677,DNA binding; GO:0015074,DNA integration; GO:0006310,DNA recombination; GO:0003674,molecular_function; GO:0003676,nucleic acid binding; GO:0005488,binding; GO:0097159,organic cyclic compound binding; GO:1901363,heterocyclic compound binding; GO:0008152,metabolic process; GO:0006139,nucleobase-containing compound metabolic process; GO:0006259,DNA metabolic process; GO:0006725,cellular ar…	WD domain, G-beta repeat	--	--	--
Cluster-1527.8565	2.02	0.24	2.61	1.48	0.55	0	38.04	4.49	55.49	30.06	10.27	0	-1.29823	0.288983	0.906187	777	--	--	--	--	--	--	--	--	--	--
Cluster-1527.31609	3.09	6.75	8.64	3.4	1.52	2.56	106.19	233.74	333.59	125.65	51.49	99.86	-1.29753	0.00354565	0.254418	1229	K11968 ariadne-1 [EC:2.3.2.31] | (RefSeq) probable E3 ubiquitin-protein ligase ARI2 isoform X1 (A)	predicted protein [Micromonas pusilla CCMP1545]	HBL1_ARATH RecName: Full=Non-symbiotic hemoglobin 1; AltName: Full=ARAth GLB1; Short=Hb1;	C1MGW9_MICPC SubName: Full=Predicted protein {ECO:0000313|EMBL:EEH60646.1};	Globins and related hemoproteins	GO:0005618,cell wall; GO:0005829,cytosol; GO:0005886,plasma membrane; GO:0009506,plasmodesma; GO:0020037,heme binding; GO:0046872,metal ion binding; GO:0019825,oxygen binding; GO:0001666,response to hypoxia; GO:0003674,molecular_function; GO:0005488,binding; GO:0046906,tetrapyrrole binding; GO:0048037,cofactor binding; GO:0097159,organic cyclic compound binding; GO:1901363,heterocyclic compound b…	Globin	--	--	--
Cluster-1527.17572	0	4.7	4.42	2.16	0	1.44	0	39.34	42.2	19.5	0	13.81	-1.29732	0.387958	0.938812	473	--	--	--	A0A1Q9DIZ6_SYMMI SubName: Full=Uncharacterized protein {ECO:0000313|EMBL:OLP95144.1};	--	--	--	--	--	--
Cluster-1527.80243	0	2.37	2.05	0.11	1.7	0	0	121.91	117.36	5.9	85.31	0	-1.29271	0.644167	0.979686	1712	--	--	--	--	--	--	--	--	--	--
Cluster-1527.26179	2.1	1.47	1.62	1.17	0.79	0.2	71.55	50.23	61.79	42.71	26.43	7.71	-1.28962	0.0275753	0.558353	1219	--	--	--	A0A1Q9F2N8_SYMMI SubName: Full=Carbohydrate-binding domain-containing protein C2E1P3.05c {ECO:0000313|EMBL:OLQ13956.1};	--	GO:0005576,extracellular region; GO:0016021,integral component of membrane; GO:0005622,intracellular; GO:0030248,cellulose binding; GO:0016301,kinase activity; GO:0005975,carbohydrate metabolic process; GO:0046854,phosphatidylinositol phosphorylation; GO:0048015,phosphatidylinositol-mediated signaling; GO:0001871,pattern binding; GO:0003674,molecular_function; GO:0030246,carbohydrate binding; GO:…	Lytic polysaccharide mono-oxygenase, cellulose-degrading	--	--	--
Cluster-1527.29056	3.03	2.41	0.97	0.78	0.63	1.18	104.43	83.62	37.6	28.86	21.23	46.12	-1.28567	0.0173041	0.485953	1230	--	--	--	B8CD27_THAPS SubName: Full=Uncharacterized protein {ECO:0000313|EMBL:EED88535.1};	--	GO:0003824,catalytic activity; GO:0003674,molecular_function	Hypothetical glycosyl hydrolase family 15	--	--	--
Cluster-1527.38879	3.64	3.38	1.17	0.65	2.76	0	67.81	63.14	24.49	13.01	50.47	0	-1.28514	0.244478	0.889399	771	--	--	--	--	--	--	--	--	--	--
Cluster-1527.72522	16	13.58	15.36	4.62	6.51	7.15	38.1	31.79	43.7	11.89	15.22	19.75	-1.28194	0.00949631	0.393231	294	--	--	--	A0A1Q9EKG7_SYMMI SubName: Full=Uncharacterized protein C24H6.11c {ECO:0000313|EMBL:OLQ07922.1};	--	GO:0016021,integral component of membrane; GO:0031207,Sec62/Sec63 complex; GO:0015116,sulfate transmembrane transporter activity; GO:0031204,posttranslational protein targeting to membrane, translocation; GO:0003674,molecular_function; GO:0005215,transporter activity; GO:0022857,transmembrane transporter activity; GO:0008509,anion transmembrane transporter activity; GO:0015075,ion transmembrane t…	--	--	--	--
Cluster-1527.3746	1.32	1.11	1.68	0.84	0.72	0.16	123	104.94	176.01	84.19	66.64	16.43	-1.28034	0.0170621	0.48501	2948	K22312 hydroxyjasmonate sulfotransferase [EC:2.8.2.39] | (RefSeq) flavonol sulfotransferase-like (A)	PREDICTED: flavonol 4'-sulfotransferase-like [Phoenix dactylifera]	F4ST_FLACH RecName: Full=Flavonol 4'-sulfotransferase; Short=F4-ST; EC=2.8.2.27;	R1DD40_EMIHU SubName: Full=Uncharacterized protein {ECO:0000313|EMBL:EOD08761.1, ECO:0000313|EnsemblProtists:EOD08761};	Sulfotransferase	GO:0005737,cytoplasm; GO:0047366,quercetin-3-sulfate 4'-sulfotransferase activity; GO:0003674,molecular_function; GO:0003824,catalytic activity; GO:0008146,sulfotransferase activity; GO:0016740,transferase activity; GO:0016782,transferase activity, transferring sulfur-containing groups; GO:0005622,intracellular; GO:0005575,cellular_component; GO:0005623,cell; GO:0044424,intracellular part; GO:004…	Sulfotransferase domain	--	--	--
Cluster-1527.4623	4.35	4.23	3.16	1.61	0.91	2.25	48.9	47.63	40.19	19.43	10.05	28.74	-1.27511	0.0143943	0.453184	556	--	--	--	--	--	--	--	--	--	--
Cluster-1527.8351	2.46	1.66	1.11	0.68	0.57	0.89	56.95	38.74	28.81	16.92	12.92	23.3	-1.27498	0.0174182	0.487623	903	--	PREDICTED: zinc finger CCCH domain-containing protein 30-like [Ipomoea nil]	C3H30_ARATH RecName: Full=Zinc finger CCCH domain-containing protein 30; Short=AtC3H30;	A0A1Q9EW32_SYMMI SubName: Full=Uncharacterized protein {ECO:0000313|EMBL:OLQ11631.1};	CCCH-type Zn-finger protein	GO:0005737,cytoplasm; GO:0005634,nucleus; GO:0003677,DNA binding; GO:0003700,DNA-binding transcription factor activity; GO:0046872,metal ion binding; GO:0006355,regulation of transcription, DNA-templated; GO:0003674,molecular_function; GO:0003676,nucleic acid binding; GO:0005488,binding; GO:0097159,organic cyclic compound binding; GO:1901363,heterocyclic compound binding; GO:0140110,transcription…	Zinc finger C-x8-C-x5-C-x3-H type (and similar)	C3H	TF	C3H
Cluster-1527.51094	2.79	1.5	1.13	1	0.33	0.87	154.46	83.92	70.29	59.61	18.21	54.88	-1.27376	0.0157988	0.471452	1840	K00876 uridine kinase [EC:2.7.1.48] | (RefSeq) uracil phosphoribosyltransferase / uridine kinase (A)	uridine kinase [Quercus suber]	--	M2XNH8_GALSU RecName: Full=Uridine kinase {ECO:0000256|RuleBase:RU003825}; EC=2.7.1.48 {ECO:0000256|RuleBase:RU003825};	Armadillo/beta-Catenin/plakoglobin	GO:0005524,ATP binding; GO:0016757,transferase activity, transferring glycosyl groups; GO:0004849,uridine kinase activity; GO:0044211,CTP salvage; GO:0044206,UMP salvage; GO:0000166,nucleotide binding; GO:0003674,molecular_function; GO:0005488,binding; GO:0008144,drug binding; GO:0017076,purine nucleotide binding; GO:0030554,adenyl nucleotide binding; GO:0032553,ribonucleotide binding; GO:0032555…	Phosphoribulokinase / Uridine kinase family	--	--	--
Cluster-1527.1592	11.99	4.86	13.21	2.82	7.65	2.03	67	27	85	17	42	13	-1.27246	0.0477455	0.637038	391	--	--	--	--	--	--	--	--	--	--
Cluster-1527.5321	4.55	4.43	1.07	2.86	1.45	0	64.8	63.22	17.22	43.77	20.34	0	-1.26716	0.239725	0.885894	643	--	--	--	--	--	--	--	--	--	--
Cluster-1527.33763	0	1.57	1.38	0.22	0.7	0.3	0	69.98	68.84	10.65	30.48	14.92	-1.26695	0.272937	0.902998	1519	--	--	--	A0A1Q9CCV7_SYMMI SubName: Full=Uncharacterized protein {ECO:0000313|EMBL:OLP80769.1};	--	GO:0016021,integral component of membrane; GO:0005509,calcium ion binding; GO:0003674,molecular_function; GO:0005488,binding; GO:0046872,metal ion binding; GO:0043167,ion binding; GO:0043169,cation binding; GO:0005575,cellular_component; GO:0016020,membrane; GO:0031224,intrinsic component of membrane; GO:0044425,membrane part	Cysteine-rich secretory protein family	--	--	--
Cluster-1527.19826	39.43	20.59	39.61	11.96	10.79	18.22	81.93	42	99	26.87	22	44	-1.26376	0.00772299	0.363296	284	--	hypothetical protein BVRB_018500 [Beta vulgaris subsp. vulgaris]	--	A0A0J8BFL5_BETVU SubName: Full=Uncharacterized protein {ECO:0000313|EMBL:KMS64610.1};	--	--	--	--	--	--
Cluster-1527.69206	5.83	3.87	6.43	1.47	2.55	2.6	47.87	31.77	60.2	12.96	20.57	24.34	-1.26147	0.0116836	0.419021	468	K02639 ferredoxin | (RefSeq) ferredoxin-like isoform X1 (A)	PREDICTED: ferredoxin-like isoform X1 [Daucus carota subsp. sativus]	FER1_PEA RecName: Full=Ferredoxin-1, chloroplastic; AltName: Full=Ferredoxin I; Flags: Precursor;	A7YXI8_ALEFU RecName: Full=Ferredoxin {ECO:0000256|RuleBase:RU364001};	--	GO:0009507,chloroplast; GO:0051537,2 iron, 2 sulfur cluster binding; GO:0009055,electron transfer activity; GO:0046872,metal ion binding; GO:0003674,molecular_function; GO:0005488,binding; GO:0048037,cofactor binding; GO:0051536,iron-sulfur cluster binding; GO:0051540,metal cluster binding; GO:0003824,catalytic activity; GO:0016491,oxidoreductase activity; GO:0043167,ion binding; GO:0043169,catio…	2Fe-2S iron-sulfur cluster binding domain	--	--	--
Cluster-1527.72516	5.07	0.2	0	1.99	0	0.27	88.83	3.49	0	37.57	0	5.44	-1.25828	0.650672	0.979686	739	--	--	--	--	--	--	--	--	--	--
Cluster-1527.74854	2.59	1.41	2.17	1.05	1.06	0.5	62.22	33.96	58.57	27.06	24.99	13.69	-1.24116	0.0110926	0.409616	927	--	--	--	--	--	--	--	--	--	--
Cluster-1527.23676	30.45	19.62	22.63	6.43	17.57	6.48	1788	1161	1489	406	1015	431	-1.2406	0.00162569	0.164149	1937	K02690 photosystem I P700 chlorophyll a apoprotein A2 | (RefSeq) psaB; photosystem I P700 chlorophyll a apoprotein A2 (A)	photosystem I P700 apoprotein A2 (chloroplast) [Ostreobium sp. HV05042]	PSAB_HETTR RecName: Full=Photosystem I P700 chlorophyll a apoprotein A2; EC=1.97.1.12; AltName: Full=PSI-B; AltName: Full=PsaB;	C6G425_HETTR SubName: Full=PSI P700 apoprotein A2 {ECO:0000313|EMBL:ACS34799.1};	--	GO:0009535,chloroplast thylakoid membrane; GO:0016021,integral component of membrane; GO:0009522,photosystem I; GO:0051539,4 iron, 4 sulfur cluster binding; GO:0016168,chlorophyll binding; GO:0046872,metal ion binding; GO:0016491,oxidoreductase activity; GO:0015979,photosynthesis; GO:0018298,protein-chromophore linkage; GO:0003674,molecular_function; GO:0005488,binding; GO:0048037,cofactor bindin…	Photosystem I psaA/psaB protein	--	--	--
Cluster-1527.72470	4.36	14.83	13.72	5.9	6.98	1.28	49.16	167.3	175.3	71.55	77.34	16.49	-1.23697	0.0519283	0.656204	557	--	--	--	--	--	--	--	--	--	--
Cluster-1527.48672	156.85	74.77	180.47	45.99	86.62	45.58	165.83	77.04	236.21	52.63	89.97	56.47	-1.23672	0.00637706	0.341151	246	--	hypothetical protein BVRB_025610 [Beta vulgaris subsp. vulgaris]	YCX91_PHAAO RecName: Full=Uncharacterized protein ORF91;	A0A0J8AZ36_BETVU SubName: Full=Uncharacterized protein {ECO:0000313|EMBL:KMS94019.1};	--	GO:0009507,chloroplast; GO:0005622,intracellular; GO:0005575,cellular_component; GO:0005623,cell; GO:0005737,cytoplasm; GO:0043231,intracellular membrane-bounded organelle; GO:0009536,plastid; GO:0043226,organelle; GO:0043227,membrane-bounded organelle; GO:0043229,intracellular organelle; GO:0044424,intracellular part; GO:0044444,cytoplasmic part; GO:0044464,cell part	--	--	--	--
Cluster-1527.55263	0.67	0.37	1.41	0.06	0.98	0	55.58	30.73	131.39	5.45	79.81	0	-1.23484	0.506179	0.963835	2646	--	--	--	A0A1Q9CTL2_SYMMI RecName: Full=Poly [ADP-ribose] polymerase {ECO:0000256|RuleBase:RU362114}; Short=PARP {ECO:0000256|RuleBase:RU362114}; EC=2.4.2.30 {ECO:0000256|RuleBase:RU362114}; EC=3.2.1.- {ECO:0000256|RuleBase:RU000489};	Ankyrin	GO:0005576,extracellular region; GO:0016021,integral component of membrane; GO:0008061,chitin binding; GO:0020037,heme binding; GO:0004553,hydrolase activity, hydrolyzing O-glycosyl compounds; GO:0046872,metal ion binding; GO:0003950,NAD+ ADP-ribosyltransferase activity; GO:0016491,oxidoreductase activity; GO:0031625,ubiquitin protein ligase binding; GO:0005975,carbohydrate metabolic process; GO:…	Poly(ADP-ribose) polymerase catalytic domain	--	--	--
Cluster-1527.52496	9.06	9.53	5.32	4.38	0	5.59	219.55	232.12	145.05	114.03	0	153.8	-1.23325	0.463631	0.956125	934	--	--	--	--	--	--	Glycine zipper	--	--	--
Cluster-1527.35291	1.02	1.04	1.21	0.68	0.76	0	54.68	56.53	72.87	39.48	40.28	0	-1.22879	0.202454	0.864814	1794	--	--	--	A0A1Q9DK90_SYMMI SubName: Full=Uncharacterized protein {ECO:0000313|EMBL:OLP95586.1};	--	GO:0016021,integral component of membrane; GO:0005575,cellular_component; GO:0016020,membrane; GO:0031224,intrinsic component of membrane; GO:0044425,membrane part	--	--	--	--
Cluster-1527.66723	8.83	2.84	7.06	2.86	1.25	3.71	115	37	104	40	16	55	-1.22845	0.0322658	0.580265	608	--	hypothetical protein BVRB_042430, partial [Beta vulgaris subsp. vulgaris]	YCX91_PHAAO RecName: Full=Uncharacterized protein ORF91;	A0A061S5B2_9CHLO SubName: Full=Cell wall-associated hydrolase {ECO:0000313|EMBL:JAC80377.1};	--	GO:0009507,chloroplast; GO:0005622,intracellular; GO:0005575,cellular_component; GO:0005623,cell; GO:0005737,cytoplasm; GO:0043231,intracellular membrane-bounded organelle; GO:0009536,plastid; GO:0043226,organelle; GO:0043227,membrane-bounded organelle; GO:0043229,intracellular organelle; GO:0044424,intracellular part; GO:0044444,cytoplasmic part; GO:0044464,cell part	--	--	--	--
Cluster-1527.84339	0.84	0.92	2	0.96	0.26	0.38	33.28	36.42	88.37	40.91	10.03	16.79	-1.22544	0.0532883	0.661103	1376	--	--	--	A0A1Q9DZ39_SYMMI SubName: Full=Uncharacterized protein {ECO:0000313|EMBL:OLQ00440.1};	--	GO:0016021,integral component of membrane; GO:0005575,cellular_component; GO:0016020,membrane; GO:0031224,intrinsic component of membrane; GO:0044425,membrane part	--	--	--	--
Cluster-1527.27198	1.94	2.44	0	1.52	0.46	0	35.77	45.29	0	30.19	8.31	0	-1.22088	0.433483	0.948425	766	--	--	--	--	--	--	--	--	--	--
Cluster-1527.28714	2.29	3.15	1.77	2.27	0	0.88	113.8	157.76	98.37	121.52	0	49.36	-1.21668	0.452602	0.95317	1675	--	--	--	--	--	--	--	--	--	--
Cluster-1527.21116	1.58	0.84	1.85	0.64	0.42	0.78	39.63	21.14	52.22	17.43	10.46	22.3	-1.21236	0.0332283	0.584207	961	K05573 NAD(P)H-quinone oxidoreductase subunit 2 [EC:7.1.1.2] | (RefSeq) LOW QUALITY PROTEIN: uncharacterized protein LOC114581250 (A)	hypothetical protein MTR_8g040260 [Medicago truncatula]	--	A0A0V0H8Z9_SOLCH SubName: Full=Putative ovule protein {ECO:0000313|EMBL:JAP16022.1};	--	--	--	--	--	--
Cluster-1527.45249	2.43	1.05	2.19	0.44	0.82	1.13	55.07	23.96	55.74	10.77	18.2	28.94	-1.2109	0.0395254	0.610725	887	--	--	--	--	--	--	--	--	--	--
Cluster-1527.76998	3.67	1.7	0.57	2.28	0.39	0	72.3	33.59	12.59	48.33	7.52	0	-1.20963	0.309331	0.915599	802	--	--	--	--	--	--	MORN repeat	--	--	--
Cluster-1527.33536	0.29	0.85	0.79	0.4	0.19	0.24	28.45	84.57	87.45	42.97	18.25	26.66	-1.20959	0.0286779	0.562918	3114	--	--	--	A0A1Q9C193_SYMMI SubName: Full=Uncharacterized protein {ECO:0000313|EMBL:OLP76687.1};	--	GO:0016757,transferase activity, transferring glycosyl groups; GO:0006004,fucose metabolic process; GO:0003674,molecular_function; GO:0003824,catalytic activity; GO:0016740,transferase activity; GO:0008152,metabolic process; GO:0005975,carbohydrate metabolic process; GO:0005996,monosaccharide metabolic process; GO:0008150,biological_process; GO:0019318,hexose metabolic process; GO:0044238,primary…	GDP-fucose protein O-fucosyltransferase	--	--	--
Cluster-1527.39156	363.75	272.21	350.98	118.95	238.55	68.84	10654.1	8021.87	11549.4	3746.14	6870.05	2286.06	-1.20793	0.0013085	0.144681	1081	K02703 photosystem II P680 reaction center D1 protein [EC:1.10.3.9] | (RefSeq) psbA, ViviCp001; photosystem II protein D1 (A)	photosystem II protein D1 (plastid) [Tacca chantrieri]	PSBA_HETRO RecName: Full=Photosystem II protein D1 {ECO:0000255|HAMAP-Rule:MF_01379}; Short=PSII D1 protein {ECO:0000255|HAMAP-Rule:MF_01379}; EC=1.10.3.9 {ECO:0000255|HAMAP-Rule:MF_01379}; AltName: Full=Photosystem II Q(B) protein {ECO:0000255|HAMAP-Rule:MF_01379};	Q2I6P9_LINPO RecName: Full=Photosystem II {ECO:0000256|HAMAP-Rule:MF_01379}; Short=PSII D1 protein {ECO:0000256|HAMAP-Rule:MF_01379}; EC=1.10.3.9 {ECO:0000256|HAMAP-Rule:MF_01379}; AltName: Full=Photosystem II Q(B) protein {ECO:0000256|HAMAP-Rule:MF_01379};	--	GO:0009535,chloroplast thylakoid membrane; GO:0016021,integral component of membrane; GO:0009523,photosystem II; GO:0016168,chlorophyll binding; GO:0045156,electron transporter, transferring electrons within the cyclic electron transport pathway of photosynthesis activity; GO:0046872,metal ion binding; GO:0009772,photosynthetic electron transport in photosystem II; GO:0018298,protein-chromophore …	Photosynthetic reaction centre protein	--	--	--
Cluster-1527.35565	1.83	1.69	2.4	0.84	0.33	1.33	111.55	103.66	164	55	19.64	91.81	-1.20586	0.0157844	0.471262	2003	--	--	--	D7FKP5_ECTSI SubName: Full=Uncharacterized protein {ECO:0000313|EMBL:CBJ29444.1};	--	GO:0008289,lipid binding; GO:0003674,molecular_function; GO:0005488,binding	Protein of unknown function (DUF1336)	--	--	--
Cluster-1527.71810	2.02	0.56	1.63	0.44	0.92	0.47	92	25.64	83.3	21.31	41.26	24.23	-1.20423	0.0397972	0.610921	1554	--	Heterogeneous nuclear ribonucleoprotein M [Monoraphidium neglectum]	--	A0A0D2LAX7_9CHLO SubName: Full=Heterogeneous nuclear ribonucleoprotein M {ECO:0000313|EMBL:KIZ03939.1};	--	GO:0030529,NA; GO:0019013,viral nucleocapsid; GO:0003723,RNA binding; GO:0003674,molecular_function; GO:0003676,nucleic acid binding; GO:0005488,binding; GO:0097159,organic cyclic compound binding; GO:1901363,heterocyclic compound binding; GO:0005575,cellular_component; GO:0019012,virion; GO:0019028,viral capsid; GO:0044423,virion part	RNA recognition motif. (a.k.a. RRM, RBD, or RNP domain)	--	--	--
Cluster-1527.28898	1.65	1.53	9.81	1.92	0	3.54	48.94	45.74	326.58	61.11	0.02	118.92	-1.20231	0.508891	0.964177	1091	K14209 solute carrier family 36 (proton-coupled amino acid transporter) | (RefSeq) amino acid transporter ANT1-like (A)	PREDICTED: amino acid transporter ANT1-like [Gossypium arboreum]	AVT3A_ARATH RecName: Full=Amino acid transporter AVT3A {ECO:0000305}; Short=AtAvt3A {ECO:0000303|PubMed:27925655}; AltName: Full=Aromatic and neutral amino acid transporter-like protein 3 {ECO:0000305};	A0A1Q9CJU2_SYMMI SubName: Full=Glycosyltransferase 25 family member {ECO:0000313|EMBL:OLP83175.1};	Amino acid transporters	GO:0016021,integral component of membrane; GO:0005774,vacuolar membrane; GO:0015171,amino acid transmembrane transporter activity; GO:0015173,aromatic amino acid transmembrane transporter activity; GO:0015175,neutral amino acid transmembrane transporter activity; GO:0003333,amino acid transmembrane transport; GO:0015801,aromatic amino acid transport; GO:0015804,neutral amino acid transport; GO:00…	Transmembrane amino acid transporter protein	--	--	--
Cluster-1527.8660	0.94	0.63	0.92	3.97	4.35	13.17	9	6	10	41	41	144	3.16919	2.93453e-06	0.00284454	508	K02964 small subunit ribosomal protein S18e | (RefSeq) 40S ribosomal protein S18 (A)	ribosomal protein S18 [Acyrthosiphon pisum]	RS18_ARATH RecName: Full=40S ribosomal protein S18;	M2W5T7_GALSU SubName: Full=40S ribosomal protein S18 {ECO:0000313|EMBL:EME31141.1};	Ribosomal protein S18	GO:0005618,cell wall; GO:0005829,cytosol; GO:0022626,cytosolic ribosome; GO:0022627,cytosolic small ribosomal subunit; GO:0016020,membrane; GO:0005730,nucleolus; GO:0005886,plasma membrane; GO:0009506,plasmodesma; GO:0005840,ribosome; GO:0015935,small ribosomal subunit; GO:0005774,vacuolar membrane; GO:0005773,vacuole; GO:0003729,mRNA binding; GO:0019843,rRNA binding; GO:0003735,structural consti…	Ribosomal protein S13/S18	--	--	--
Cluster-1527.25311	1.74	2	6.97	1.77	0.39	2.38	76.61	88.63	343.22	83.5	17.06	118.71	-1.19735	0.0826437	0.732172	1507	--	--	--	--	--	--	--	--	--	--
Cluster-1527.65202	0.64	0.79	1	0	0.71	0.32	58.46	73.05	102.1	0	63.52	33.19	-1.19663	0.235643	0.884533	2883	--	--	--	J3LRK8_ORYBR SubName: Full=Uncharacterized protein {ECO:0000313|EnsemblPlants:OB03G36840.1};	--	--	Ankyrin repeats (3 copies)	--	--	--
Cluster-1527.39664	0	3.25	6.04	0	0	3.76	0	34.14	72.02	0	0	44.99	-1.19511	0.745792	0.985764	535	--	--	--	--	--	--	--	--	--	--
Cluster-1527.26134	2.1	1.64	0.46	1.13	0.34	0.41	221.71	174.71	54.85	128.44	34.78	48.47	-1.19349	0.0503349	0.647529	3295	--	--	--	A0A1Q9D3L8_SYMMI SubName: Full=Nephrocystin-3 {ECO:0000313|EMBL:OLP89745.1};	--	--	Tetratricopeptide repeat	--	--	--
Cluster-1527.13344	0.47	0.74	0.93	0.34	0.42	0.19	57.82	91.69	128.2	44.47	51.21	26.25	-1.18964	0.00661507	0.34586	3818	K19025 AP-5 complex subunit zeta-1 | (GenBank) AP-5 complex subunit zeta-like protein (A)	AP-5 complex subunit zeta-like protein [Medicago truncatula]	--	A0A1Q9CKJ4_SYMMI SubName: Full=AP-5 complex subunit zeta-1 {ECO:0000313|EMBL:OLP83439.1};	--	GO:0044599,AP-5 adaptor complex; GO:0005622,intracellular; GO:0005575,cellular_component; GO:0016020,membrane; GO:0005623,cell; GO:0005737,cytoplasm; GO:0030119,AP-type membrane coat adaptor complex; GO:0030117,membrane coat; GO:0032991,protein-containing complex; GO:0044424,intracellular part; GO:0044425,membrane part; GO:0044444,cytoplasmic part; GO:0044464,cell part; GO:0048475,coated membrane…	AP-5 complex subunit, vesicle trafficking	--	--	--
Cluster-1527.84364	3.34	1.4	2.17	0.66	0.94	1.35	89.45	37.72	65.28	18.95	24.69	41.01	-1.18373	0.0218984	0.524121	1007	--	--	--	--	--	--	GIY-YIG catalytic domain	--	--	--
Cluster-1527.44050	10.07	20.24	18.21	4.21	6.66	9.96	704.61	1426.66	1426.13	316.63	458.12	788.26	-1.18282	0.00196678	0.182437	2263	--	--	--	A0A1E7FC70_9STRA SubName: Full=Periplasmic binding protein-like I {ECO:0000313|EMBL:OEU15403.1};	--	--	Periplasmic binding protein domain	--	--	--
Cluster-1527.53420	3.63	5.48	3.59	1.41	3.04	1.11	80.32	121.79	89.29	33.54	66	27.8	-1.18254	0.0109923	0.408217	872	--	PREDICTED: uncharacterized protein LOC104885893, partial [Beta vulgaris subsp. vulgaris]	--	A0A1Q9CC66_SYMMI SubName: Full=Multidrug and toxin extrusion protein 1 {ECO:0000313|EMBL:OLP80417.1};	--	GO:0016021,integral component of membrane; GO:0015297,antiporter activity; GO:0015238,drug transmembrane transporter activity; GO:0003674,molecular_function; GO:0005215,transporter activity; GO:0022857,transmembrane transporter activity; GO:0015291,secondary active transmembrane transporter activity; GO:0022804,active transmembrane transporter activity; GO:0005575,cellular_component; GO:0016020,m…	GYF domain	--	--	--
Cluster-1527.21586	4.1	7.83	7.26	3.4	2.42	2.63	19	36	39	17	11	14	-1.177	0.0339753	0.587915	363	--	--	--	--	--	--	FeoA domain	--	--	--
Cluster-1527.14239	2.93	3.03	3.71	0	2.79	1.38	133.74	139.04	189.79	0.14	125.11	71.31	-1.17699	0.47922	0.958387	1556	K16911 ATP-dependent RNA helicase DDX21 [EC:3.6.4.13] | (RefSeq) ATP-dependent RNA helicase (A)	hypothetical protein SELMODRAFT_10677, partial [Selaginella moellendorffii]	RH7_SPIOL RecName: Full=DEAD-box ATP-dependent RNA helicase 7; EC=3.6.4.13;	A0A1Q9DJX1_SYMMI SubName: Full=DEAD-box ATP-dependent RNA helicase 7 {ECO:0000313|EMBL:OLP95466.1};	ATP-dependent RNA helicase	GO:0005634,nucleus; GO:0005524,ATP binding; GO:0004386,helicase activity; GO:0003723,RNA binding; GO:0000166,nucleotide binding; GO:0003674,molecular_function; GO:0005488,binding; GO:0008144,drug binding; GO:0017076,purine nucleotide binding; GO:0030554,adenyl nucleotide binding; GO:0032553,ribonucleotide binding; GO:0032555,purine ribonucleotide binding; GO:0032559,adenyl ribonucleotide binding;…	Neisseria meningitidis TspB protein	--	--	--
Cluster-1527.30563	0	1.62	1.23	0.25	0.77	0.27	0	50.48	42.8	8.41	23.31	9.33	-1.17588	0.323833	0.918972	1130	--	--	--	--	--	--	--	--	--	--
Cluster-1527.23354	23.22	27.82	22.92	13.42	8.87	10.37	56	66	66	35	21	29	-1.17047	0.00205965	0.187422	295	--	--	--	--	--	--	--	--	--	--
Cluster-1527.63708	5.62	2.52	5.01	1.78	1.63	2.36	53.73	24.08	54.43	18.26	15.32	25.7	-1.16909	0.0276608	0.558353	507	--	hypothetical protein BVRB_041110, partial [Beta vulgaris subsp. vulgaris]	--	A0A0J7YMY6_BETVU SubName: Full=Uncharacterized protein {ECO:0000313|EMBL:KMS64936.1}; Flags: Fragment;	--	--	--	--	--	--
Cluster-1527.34008	1.77	0.58	0.92	0.24	0.6	0.59	134.18	44.3	78.12	19.74	44.44	50.24	-1.16683	0.037339	0.599746	2428	--	--	--	A0A1Q9DJR0_SYMMI SubName: Full=Uncharacterized protein {ECO:0000313|EMBL:OLP95399.1};	--	--	--	--	--	--
Cluster-1527.8105	1.64	1.66	3.75	1.3	0.85	0.97	49	50	126	42	25	33	-1.16297	0.0151942	0.463511	1100	--	--	--	A0A1Q9CZP1_SYMMI SubName: Full=Uncharacterized protein {ECO:0000313|EMBL:OLP88395.1};	--	--	--	--	--	--
Cluster-1527.87570	1.74	1.95	2.59	1.42	0.48	0.9	48	54	80	42	13	28	-1.16091	0.0176714	0.487914	1030	--	unknown protein [Bathycoccus prasinos]	--	R1F9K0_EMIHU SubName: Full=Uncharacterized protein {ECO:0000313|EMBL:EOD35660.1, ECO:0000313|EnsemblProtists:EOD04463};	--	--	--	--	--	--
Cluster-1527.73806	4.99	1.92	5.78	0	0	5.23	91.36	35.28	119.33	0	0	108.72	-1.16007	0.658856	0.979686	762	--	--	--	--	--	--	--	--	--	--
Cluster-1527.41047	61.49	36.8	56.67	18.22	36.53	14.19	4000	2413	4129	1274	2337	1045	-1.15869	0.000935178	0.116151	2121	K02689 photosystem I P700 chlorophyll a apoprotein A1 | (RefSeq) psaA; P700 apoprotein A1 of photosystem I (A)	P700 apoprotein A1 of photosystem I (chloroplast) [Choricystis parasitica]	PSAA_HETTR RecName: Full=Photosystem I P700 chlorophyll a apoprotein A1 {ECO:0000255|HAMAP-Rule:MF_00458}; EC=1.97.1.12 {ECO:0000255|HAMAP-Rule:MF_00458}; AltName: Full=PSI-A {ECO:0000255|HAMAP-Rule:MF_00458}; AltName: Full=PsaA {ECO:0000255|HAMAP-Rule:MF_00458};	C6G424_HETTR RecName: Full=Photosystem I P700 chlorophyll a apoprotein A1 {ECO:0000256|HAMAP-Rule:MF_00458}; EC=1.97.1.12 {ECO:0000256|HAMAP-Rule:MF_00458}; AltName: Full=PSI-A {ECO:0000256|HAMAP-Rule:MF_00458}; AltName: Full=PsaA {ECO:0000256|HAMAP-Rule:MF_00458};	--	GO:0009535,chloroplast thylakoid membrane; GO:0016021,integral component of membrane; GO:0009522,photosystem I; GO:0051539,4 iron, 4 sulfur cluster binding; GO:0016168,chlorophyll binding; GO:0046872,metal ion binding; GO:0016491,oxidoreductase activity; GO:0015979,photosynthesis; GO:0018298,protein-chromophore linkage; GO:0003674,molecular_function; GO:0005488,binding; GO:0048037,cofactor bindin…	Photosystem I psaA/psaB protein	--	--	--
Cluster-1527.29860	3.4	2.47	2.91	2.38	1.06	0.55	191.16	140.19	183.23	144.17	58.94	35.16	-1.15539	0.0140923	0.449366	1866	K19307 25S rRNA (uracil2634-N3)-methyltransferase [EC:2.1.1.313] | (RefSeq) uncharacterized protein At4g26485 (A)	hypothetical protein LSAT_7X115181 [Lactuca sativa]	--	A0A1Q9CDU2_SYMMI SubName: Full=E3 SUMO-protein ligase RanBP2 {ECO:0000313|EMBL:OLP81113.1};	--	GO:0005622,intracellular; GO:0016874,ligase activity; GO:0046907,intracellular transport; GO:0003674,molecular_function; GO:0003824,catalytic activity; GO:0006810,transport; GO:0008150,biological_process; GO:0051179,localization; GO:0051234,establishment of localization; GO:0051641,cellular localization; GO:0051649,establishment of localization in cell; GO:0005575,cellular_component; GO:0005623,c…	Domain of unknown function (DUF2431)	--	--	--
Cluster-1527.52290	155.98	107.08	158.11	50.06	105.27	33.93	1833	1260	2105	633	1216	454	-1.14943	0.00228902	0.198741	571	K02690 photosystem I P700 chlorophyll a apoprotein A2 | (RefSeq) psaB; photosystem I P700 chlorophyll a apoprotein A2 (A)	P700 apoprotein A2 of photosystem I (chloroplast) [Tupiella akineta]	PSAB_HETTR RecName: Full=Photosystem I P700 chlorophyll a apoprotein A2; EC=1.97.1.12; AltName: Full=PSI-B; AltName: Full=PsaB;	C6G425_HETTR SubName: Full=PSI P700 apoprotein A2 {ECO:0000313|EMBL:ACS34799.1};	--	GO:0009535,chloroplast thylakoid membrane; GO:0016021,integral component of membrane; GO:0009522,photosystem I; GO:0051539,4 iron, 4 sulfur cluster binding; GO:0016168,chlorophyll binding; GO:0046872,metal ion binding; GO:0016491,oxidoreductase activity; GO:0015979,photosynthesis; GO:0018298,protein-chromophore linkage; GO:0003674,molecular_function; GO:0005488,binding; GO:0048037,cofactor bindin…	Photosystem I psaA/psaB protein	--	--	--
Cluster-1527.60969	4.31	0.62	2.55	0.77	1.37	1.17	348.71	50.85	230.44	66.98	109.3	107.32	-1.14749	0.0501232	0.646353	2581	--	--	--	A0A1Q9C6E8_SYMMI SubName: Full=Uncharacterized protein {ECO:0000313|EMBL:OLP78500.1};	--	GO:0016021,integral component of membrane; GO:0005509,calcium ion binding; GO:0003674,molecular_function; GO:0005488,binding; GO:0046872,metal ion binding; GO:0043167,ion binding; GO:0043169,cation binding; GO:0005575,cellular_component; GO:0016020,membrane; GO:0031224,intrinsic component of membrane; GO:0044425,membrane part	--	--	--	--
Cluster-1527.81765	2.42	1.27	2.33	2.44	0.39	0	63.2	33.42	68.43	68.4	10.04	0	-1.14624	0.298535	0.91087	988	--	hypothetical protein CEUSTIGMA_g7402.t1 [Chlamydomonas eustigma]	--	A0A1Q9F4D1_SYMMI SubName: Full=Kinase D-interacting substrate of 220 kDa {ECO:0000313|EMBL:OLQ14492.1};	--	GO:0016301,kinase activity; GO:0003674,molecular_function; GO:0003824,catalytic activity; GO:0016740,transferase activity; GO:0016772,transferase activity, transferring phosphorus-containing groups	--	--	--	--
Cluster-1527.64888	44.48	13.05	33.24	16.64	19.4	6.32	42	12	39	17	18	7	-1.14434	0.102489	0.76215	241	--	--	--	--	--	--	--	--	--	--
Cluster-1527.67000	0.93	1.12	1.01	0.39	0.45	0.54	40.47	49.06	49.12	18.18	19.28	26.43	-1.14318	0.00903773	0.386161	1494	--	--	--	A0A1Q9C2F9_SYMMI SubName: Full=Uncharacterized protein {ECO:0000313|EMBL:OLP77099.1};	--	GO:0016021,integral component of membrane; GO:0005575,cellular_component; GO:0016020,membrane; GO:0031224,intrinsic component of membrane; GO:0044425,membrane part	--	--	--	--
Cluster-1527.84986	6.59	5.03	7.52	3.94	2.49	2.25	137	105	176	88	51	53	-1.13957	0.000500482	0.0801875	834	K12195 charged multivesicular body protein 6 | (RefSeq) charged multivesicular body protein 6-like (A)	charged multivesicular body protein 6 [Zea mays]	VP201_ARATH RecName: Full=Vacuolar protein sorting-associated protein 20 homolog 1; Short=AtVPS20-1; AltName: Full=Charged multivesicular body protein 6 homolog 1; AltName: Full=ESCRT-III complex subunit VPS20 homolog 1;	A0A1Q9EXS3_SYMMI SubName: Full=Charged multivesicular body protein 6 {ECO:0000313|EMBL:OLQ12201.1};	Uncharacterized conserved protein predicted to be involved in protein sorting	GO:0005768,endosome; GO:0015031,protein transport; GO:0007034,vacuolar transport; GO:0008104,protein localization; GO:0006810,transport; GO:0008150,biological_process; GO:0015833,peptide transport; GO:0033036,macromolecule localization; GO:0042886,amide transport; GO:0045184,establishment of protein localization; GO:0051179,localization; GO:0051234,establishment of localization; GO:0071702,organi…	Snf7	--	--	--
Cluster-1527.26383	1.24	1.22	1.58	0.46	0.63	0.7	73.04	72.31	104.29	29.06	36.77	46.67	-1.13714	0.00219451	0.193962	1942	--	--	--	--	--	--	--	--	--	--
Cluster-1527.34853	22.99	2.16	23.63	14.42	5.22	2.89	1099.56	103.93	1267.18	741.62	245.34	156.7	-1.13667	0.275898	0.903942	1620	--	--	--	A0A1Q9EJK6_SYMMI SubName: Full=Carbohydrate-binding domain-containing protein C2E1P3.05c {ECO:0000313|EMBL:OLQ07619.1};	--	GO:0005576,extracellular region; GO:0030248,cellulose binding; GO:0005975,carbohydrate metabolic process; GO:0001871,pattern binding; GO:0003674,molecular_function; GO:0030246,carbohydrate binding; GO:0005488,binding; GO:0030247,polysaccharide binding; GO:0008152,metabolic process; GO:0008150,biological_process; GO:0044238,primary metabolic process; GO:0071704,organic substance metabolic process;…	--	--	--	--
Cluster-1527.19923	2.29	0.51	8.1	1.49	0.73	2.64	56.54	12.65	224.62	39.48	17.64	73.72	-1.12691	0.177716	0.84443	946	--	--	--	--	--	--	Influenza C hemagglutinin stalk	--	--	--
Cluster-1527.30246	1.08	3.52	3.53	0.22	0.84	2.49	40.05	131.85	147.33	8.87	30.85	105.01	-1.11923	0.151524	0.820478	1311	--	--	--	A0A1E7FC70_9STRA SubName: Full=Periplasmic binding protein-like I {ECO:0000313|EMBL:OEU15403.1};	--	--	Periplasmic binding protein domain	--	--	--
Cluster-1527.72985	4.34	1.48	5.63	2.28	0.88	2.04	60	20.5	88	33.85	12	32	-1.11563	0.0763883	0.71916	631	--	leucine rich protein [Arachis hypogaea]	--	Q0MX19_ARAHY SubName: Full=Leucine rich protein {ECO:0000313|EMBL:ABH09321.1};	--	--	--	--	--	--
Cluster-1527.15561	1.23	1.42	1.1	0.45	1.29	0	118.44	137.21	118.14	46.76	121.84	0	-1.11274	0.502026	0.962864	3020	--	hypothetical protein MNEG_6790 [Monoraphidium neglectum]	--	A0A1Q9C9Z7_SYMMI SubName: Full=Uncharacterized protein {ECO:0000313|EMBL:OLP79750.1};	--	--	von Willebrand factor type A domain	--	--	--
Cluster-1527.24475	1.63	1.28	1.91	1.06	0.91	0.27	60.34	47.71	79.29	42	32.98	11.51	-1.11266	0.0316972	0.577931	1303	--	--	--	A0A1Q9EX53_SYMMI SubName: Full=Uncharacterized protein {ECO:0000313|EMBL:OLQ11965.1};	--	--	--	--	--	--
Cluster-1527.67664	0	0	1.86	0.89	0	0	0	0	93.1	42.7	0	0	-1.11061	1	1	1528	--	6-phosphogluconolactonase [Bathycoccus prasinos]	--	A0A1Q9C4B8_SYMMI SubName: Full=6-phosphogluconolactonase {ECO:0000313|EMBL:OLP77762.1};	--	GO:0016021,integral component of membrane; GO:0003676,nucleic acid binding; GO:0003674,molecular_function; GO:0005488,binding; GO:0097159,organic cyclic compound binding; GO:1901363,heterocyclic compound binding; GO:0005575,cellular_component; GO:0016020,membrane; GO:0031224,intrinsic component of membrane; GO:0044425,membrane part	Lactonase, 7-bladed beta-propeller	--	--	--
Cluster-1527.80604	1.29	1.99	0.44	1.17	0	0.59	52.67	81.62	19.87	51.21	0	27.14	-1.10831	0.298877	0.91102	1413	--	--	--	--	--	--	--	--	--	--
Cluster-1527.64629	2.13	1.62	1.64	1.18	0.53	0.78	60.56	46.26	52.45	36.17	14.74	25.2	-1.10293	0.0149367	0.459089	1056	--	--	--	--	--	--	--	--	--	--
Cluster-1527.25559	1.75	1.7	2.36	1.03	0.95	0.74	77.53	75.82	117.11	48.81	41.47	37.29	-1.09879	0.00100343	0.119835	1516	--	--	--	A0A1Q9CB21_SYMMI SubName: Full=Magnesium-dependent phosphatase 1 {ECO:0000313|EMBL:OLP80125.1};	--	GO:0016021,integral component of membrane; GO:0016791,phosphatase activity; GO:0003674,molecular_function; GO:0003824,catalytic activity; GO:0016787,hydrolase activity; GO:0016788,hydrolase activity, acting on ester bonds; GO:0042578,phosphoric ester hydrolase activity; GO:0005575,cellular_component; GO:0016020,membrane; GO:0031224,intrinsic component of membrane; GO:0044425,membrane part	--	--	--	--
Cluster-1527.52140	2.92	4.55	2.46	1.4	0	3.09	161.13	253.21	152.35	82.81	0	193.1	-1.09765	0.523946	0.966825	1835	K11481 aurora kinase A [EC:2.7.11.1] | (RefSeq) Serine/threonine protein kinase (A)	hypothetical protein PAHAL_F01667 [Panicum hallii]	PPCK2_ARATH RecName: Full=Phosphoenolpyruvate carboxylase kinase 2; Short=AtPPCK2; EC=2.7.11.1;	A0A1X6NVF3_PORUM SubName: Full=Uncharacterized protein {ECO:0000313|EMBL:OSX72591.1};	Ca2+/calmodulin-dependent protein kinase, EF-Hand protein superfamily	GO:0005737,cytoplasm; GO:0005634,nucleus; GO:0005524,ATP binding; GO:0009931,calcium-dependent protein serine/threonine kinase activity; GO:0005516,calmodulin binding; GO:0004683,calmodulin-dependent protein kinase activity; GO:0004674,protein serine/threonine kinase activity; GO:0016036,cellular response to phosphate starvation; GO:0035556,intracellular signal transduction; GO:0018105,peptidyl-s…	Protein kinase domain	--	--	--
Cluster-1527.13075	15.09	16.22	19.46	9.17	10.1	4.83	35	37	54	23	23	13	-1.09557	0.0232193	0.530994	292	--	--	--	A0A1Q9DY78_SYMMI SubName: Full=Uncharacterized protein {ECO:0000313|EMBL:OLQ00079.1};	--	GO:0005509,calcium ion binding; GO:0009982,pseudouridine synthase activity; GO:0003723,RNA binding; GO:0001522,pseudouridine synthesis; GO:0003674,molecular_function; GO:0005488,binding; GO:0046872,metal ion binding; GO:0043167,ion binding; GO:0043169,cation binding; GO:0003824,catalytic activity; GO:0016853,isomerase activity; GO:0016866,intramolecular transferase activity; GO:0003676,nucleic ac…	--	--	--	--
Cluster-1527.10934	21.29	10.49	20.34	4.14	7.71	11.76	85.87	41.87	95.61	18	30.54	54.59	-1.09533	0.0419563	0.619696	345	--	hypothetical protein BVRB_018500 [Beta vulgaris subsp. vulgaris]	--	A0A0J8BFL5_BETVU SubName: Full=Uncharacterized protein {ECO:0000313|EMBL:KMS64610.1};	--	--	--	--	--	--
Cluster-1527.59450	1.3	1.4	2.37	0.71	0.5	1.12	113.66	123.33	231.5	66.37	43.37	111.09	-1.09095	0.00995833	0.398766	2770	--	flagellar protein [Chlamydomonas reinhardtii]	--	A0A1Q9EIT4_SYMMI SubName: Full=Polycystin-2 {ECO:0000313|EMBL:OLQ07278.1};	Ca2+-modulated nonselective cation channel polycystin	GO:0016021,integral component of membrane; GO:0005575,cellular_component; GO:0016020,membrane; GO:0031224,intrinsic component of membrane; GO:0044425,membrane part	Polycystin cation channel	--	--	--
Cluster-1527.45252	1.51	1.35	1.41	1.45	0	0.58	67.09	60.28	69.99	69.04	0	29.31	-1.0904	0.270103	0.901541	1518	--	--	--	--	--	--	--	--	--	--
Cluster-1527.3411	3.87	3.44	4.77	1.94	1.89	1.81	104	93	144	56	50	55	-1.08762	0.000248735	0.0516658	1010	--	--	--	A0A1Q9CZP1_SYMMI SubName: Full=Uncharacterized protein {ECO:0000313|EMBL:OLP88395.1};	--	--	Methyltransferase FkbM domain	--	--	--
Cluster-1527.82828	67.51	38.01	56.45	20.42	37.81	17.53	645	363	613	210	355	191	-1.0874	0.0016641	0.166296	507	K02637 cytochrome b6-f complex subunit 4 | (RefSeq) petD; Cytochrome b6-f complex subunit IV (A)	subunit IV of cytochrome b6/f complex (chloroplast) [Cymbomonas tetramitiformis]	PETD_AMPCA RecName: Full=Cytochrome b6-f complex subunit 4 {ECO:0000255|HAMAP-Rule:MF_01344}; AltName: Full=17 kDa polypeptide {ECO:0000255|HAMAP-Rule:MF_01344};	C6G423_HETTR SubName: Full=Cytochrome b6/f complex subunit IV {ECO:0000313|EMBL:ACS34797.1};	Cytochrome b	GO:0009535,chloroplast thylakoid membrane; GO:0016021,integral component of membrane; GO:0045156,electron transporter, transferring electrons within the cyclic electron transport pathway of photosynthesis activity; GO:0009767,photosynthetic electron transport chain; GO:0009055,electron transfer activity; GO:0003674,molecular_function; GO:0003824,catalytic activity; GO:0016491,oxidoreductase activ…	Cytochrome b(C-terminal)/b6/petD	--	--	--
Cluster-1527.56803	10.24	3.89	10.16	4.04	2.37	4.81	259	99	289	110	59	138	-1.08712	0.0144314	0.453184	965	--	hypothetical protein BVRB_037930, partial [Beta vulgaris subsp. vulgaris]	--	A0A0J8BHP9_BETVU SubName: Full=Uncharacterized protein {ECO:0000313|EMBL:KMS65245.1}; Flags: Fragment;	--	--	--	--	--	--
Cluster-1527.28985	1.91	2.87	1.91	1.07	1.28	0.79	103.56	156.8	116.39	62.28	68.54	48.81	-1.08314	0.00143698	0.153348	1807	--	--	XB36_ORYSJ RecName: Full=Probable E3 ubiquitin-protein ligase XBOS36; EC=2.3.2.27; AltName: Full=Ankyrin repeat domain and RING finger-containing protein XBOS36; AltName: Full=RING-type E3 ubiquitin transferase XBOS36; AltName: Full=XB3 protein homolog 6;	A0A1Q9CF68_SYMMI SubName: Full=Uncharacterized protein {ECO:0000313|EMBL:OLP81551.1};	--	GO:0046872,metal ion binding; GO:0016740,transferase activity; GO:0016567,protein ubiquitination; GO:0003674,molecular_function; GO:0005488,binding; GO:0043167,ion binding; GO:0043169,cation binding; GO:0003824,catalytic activity; GO:0008152,metabolic process; GO:0006464,cellular protein modification process; GO:0006807,nitrogen compound metabolic process; GO:0008150,biological_process; GO:000998…	Ankyrin repeats (3 copies)	--	--	--
Cluster-1527.67035	0.86	0.38	0.16	0.31	0.27	0.11	95.72	42.66	19.24	36.39	29.3	13.26	-1.07496	0.124401	0.788792	3454	K14442 ATP-dependent RNA helicase DHX36 [EC:3.6.4.13] | (RefSeq) ATP-dependent RNA helicase DHX36-like isoform X1 (A)	hypothetical protein PHYPA_011733 [Physcomitrella patens]	DEXH7_ARATH RecName: Full=DExH-box ATP-dependent RNA helicase DExH7, chloroplastic {ECO:0000305}; EC=3.6.4.13 {ECO:0000305}; Flags: Precursor;	A0A1Q9F0E6_SYMMI SubName: Full=ATP-dependent RNA helicase A {ECO:0000313|EMBL:OLQ13129.1};	Dosage compensation complex, subunit MLE	GO:0009507,chloroplast; GO:0005737,cytoplasm; GO:0005524,ATP binding; GO:0004004,ATP-dependent RNA helicase activity; GO:0003723,RNA binding; GO:0006396,RNA processing; GO:0000166,nucleotide binding; GO:0003674,molecular_function; GO:0005488,binding; GO:0008144,drug binding; GO:0017076,purine nucleotide binding; GO:0030554,adenyl nucleotide binding; GO:0032553,ribonucleotide binding; GO:0032555,p…	Helicase conserved C-terminal domain	--	--	--
Cluster-1527.38809	33.96	31.69	17.52	4.05	20.78	13.8	666.42	624.81	387.3	85.57	400.85	307.49	-1.07256	0.0363092	0.5985	800	--	--	--	--	--	--	Zinc finger C-x8-C-x5-C-x3-H type (and similar)	C3H	TF	C3H
Cluster-1527.46753	8.08	35.86	21.35	3.48	10	16.51	293.08	1309.3	868.98	135.72	356.56	678.76	-1.07206	0.203751	0.865588	1284	K01674 carbonic anhydrase [EC:4.2.1.1] | (RefSeq) alpha carbonic anhydrase 7-like (A)	alpha carbonic anhydrase 7-like [Ananas comosus]	ATCA7_ARATH RecName: Full=Alpha carbonic anhydrase 7; Short=AtaCA7; Short=AtalphaCA7; EC=4.2.1.1; AltName: Full=Alpha carbonate dehydratase 7; Flags: Precursor;	R1DAV9_EMIHU SubName: Full=Alpha-type carbonic anhydrase {ECO:0000313|EMBL:EOD32568.1}; Flags: Fragment;	Carbonic anhydrase	GO:0009570,chloroplast stroma; GO:0004089,carbonate dehydratase activity; GO:0008270,zinc ion binding; GO:0006730,one-carbon metabolic process; GO:0003674,molecular_function; GO:0003824,catalytic activity; GO:0016829,lyase activity; GO:0016835,carbon-oxygen lyase activity; GO:0016836,hydro-lyase activity; GO:0005488,binding; GO:0046872,metal ion binding; GO:0043167,ion binding; GO:0043169,cation …	Eukaryotic-type carbonic anhydrase	--	--	--
Cluster-1527.73991	204.51	109.2	186.14	60.4	78.6	95.59	750	396	799	239	283	404	-1.06744	0.000867881	0.11192	334	--	--	--	--	--	--	--	--	--	--
Cluster-1527.19124	0.6	0.13	0.97	0.35	0.48	0	64.24	13.79	115.73	39.8	50.04	0	-1.06183	0.340455	0.925173	3319	--	--	--	--	--	--	Protein of unknown function (DUF1585)	--	--	--
Cluster-1527.73623	0.65	0.72	0.4	0.28	0.18	0.37	60.75	67.51	41.11	27.72	16.62	38.75	-1.05885	0.0289167	0.563287	2932	--	--	--	A0A1Q9EHQ1_SYMMI SubName: Full=Calcium-dependent protein kinase 1 {ECO:0000313|EMBL:OLQ06955.1};	--	GO:0005524,ATP binding; GO:0005509,calcium ion binding; GO:0004672,protein kinase activity; GO:0000166,nucleotide binding; GO:0003674,molecular_function; GO:0005488,binding; GO:0008144,drug binding; GO:0017076,purine nucleotide binding; GO:0030554,adenyl nucleotide binding; GO:0032553,ribonucleotide binding; GO:0032555,purine ribonucleotide binding; GO:0032559,adenyl ribonucleotide binding; GO:00…	--	--	--	--
Cluster-1527.61215	0.86	1.48	1.27	0.72	0.68	0.33	32.01	55.04	52.67	28.72	24.83	13.78	-1.05522	0.0325596	0.581713	1306	K00010 myo-inositol 2-dehydrogenase / D-chiro-inositol 1-dehydrogenase [EC:1.1.1.18 1.1.1.369] | (RefSeq) probable inositol 2-dehydrogenase (A)	--	--	A0A1Q9BYS8_SYMMI SubName: Full=Inositol oxygenase {ECO:0000313|EMBL:OLP75825.1}; Flags: Fragment;	--	GO:0005737,cytoplasm; GO:0050113,inositol oxygenase activity; GO:0005506,iron ion binding; GO:0019310,inositol catabolic process; GO:0003674,molecular_function; GO:0003824,catalytic activity; GO:0016491,oxidoreductase activity; GO:0016701,oxidoreductase activity, acting on single donors with incorporation of molecular oxygen; GO:0005488,binding; GO:0046872,metal ion binding; GO:0043167,ion bindin…	Oxidoreductase family, NAD-binding Rossmann fold	--	--	--
Cluster-1527.51354	9.11	12.99	9.76	0	15.38	0	41	58	51	0	68	0	-1.05331	0.672723	0.980263	359	--	--	--	--	--	--	--	--	--	--
Cluster-1527.45746	5.5	7.11	1.84	5.36	1.86	0	108.38	140.71	40.74	113.53	36.06	0	-1.05247	0.535045	0.96836	802	--	--	--	--	--	--	MORN repeat	--	--	--
Cluster-1527.60140	1.85	3.14	0	0	0	2.26	164.92	281.68	0	0	0.01	227.52	-1.04996	0.778148	0.987785	2819	K12385 Niemann-Pick C1 protein | (RefSeq) RND family transporter: Niemann-Pick type C1 disease protein-like protein (A)	Sterol-sensing domain [Ostreococcus tauri]	--	A0A1Q9CVB5_SYMMI SubName: Full=Niemann-Pick C1 protein {ECO:0000313|EMBL:OLP86866.1};	Cholesterol transport protein (Niemann-Pick C disease protein)	GO:0016021,integral component of membrane; GO:0016787,hydrolase activity; GO:0006629,lipid metabolic process; GO:0003674,molecular_function; GO:0003824,catalytic activity; GO:0008152,metabolic process; GO:0008150,biological_process; GO:0044238,primary metabolic process; GO:0071704,organic substance metabolic process; GO:0005575,cellular_component; GO:0016020,membrane; GO:0031224,intrinsic compone…	Patched family	--	--	--
Cluster-1527.40612	2.09	0.1	0.79	0	0.77	0.61	161.44	7.69	67.89	0	58.75	53.12	-1.04899	0.57173	0.973576	2471	--	hypothetical protein GLYMA_13G0180002, partial [Glycine max]	--	A0A0R0GUN2_SOYBN SubName: Full=Uncharacterized protein {ECO:0000313|EMBL:KRH17812.1}; Flags: Fragment;	--	--	--	--	--	--
Cluster-1527.56802	95.31	30.46	69.9	35.23	19.4	39.73	90	28	82	36	18	44	-1.04785	0.0600884	0.680526	241	--	hypothetical protein BVRB_037930, partial [Beta vulgaris subsp. vulgaris]	--	A0A0J8BHP9_BETVU SubName: Full=Uncharacterized protein {ECO:0000313|EMBL:KMS65245.1}; Flags: Fragment;	--	--	--	--	--	--
Cluster-1527.4436	0.67	0.89	0.03	0.08	0.35	0.33	56.28	75.77	2.89	7.47	29.49	31.45	-1.04785	0.287256	0.906187	2687	--	--	--	A0A1Q9D3X6_SYMMI SubName: Full=Uncharacterized protein {ECO:0000313|EMBL:OLP89847.1};	--	GO:0016021,integral component of membrane; GO:0005575,cellular_component; GO:0016020,membrane; GO:0031224,intrinsic component of membrane; GO:0044425,membrane part	Domain of unknown function (DUF1772)	--	--	--
Cluster-1527.68003	0.5	0.65	0.61	0.23	0.37	0.23	34.22	44.46	46.38	16.56	24.95	17.97	-1.04773	0.0249994	0.542779	2215	--	--	--	--	--	--	Ubiquitin family	--	--	--
Cluster-1527.44882	3.26	3.22	3.54	0.97	1.76	2.02	86.63	86.23	105.89	27.62	45.94	61.03	-1.04455	0.00827227	0.372669	1003	--	predicted protein [Hordeum vulgare subsp. vulgare]	--	F2DST9_HORVV SubName: Full=Predicted protein {ECO:0000313|EMBL:BAJ98160.1};	--	--	PA14 domain	--	--	--
Cluster-1527.60436	1.81	2.35	3.72	0.38	2.13	1.26	47.82	62.58	110.61	10.74	55.46	37.69	-1.04201	0.0940984	0.747919	998	--	--	--	A0A1Q9CXH2_SYMMI SubName: Full=Zinc finger CCCH domain-containing protein 39 {ECO:0000313|EMBL:OLP87623.1};	--	GO:0046872,metal ion binding; GO:0003674,molecular_function; GO:0005488,binding; GO:0043167,ion binding; GO:0043169,cation binding	Zinc finger C-x8-C-x5-C-x3-H type (and similar)	C3H	TF	C3H
Cluster-1527.68133	2.71	3.21	3.21	0.93	1.93	1.51	97.85	116.73	130.43	36.34	68.68	61.72	-1.0385	0.00528651	0.313852	1281	--	--	--	--	--	--	--	--	--	--
Cluster-1527.11682	1.05	0.68	1.73	0.58	0.88	0.24	43.13	27.97	79.83	25.42	35.52	11.29	-1.03645	0.0892861	0.742544	1424	--	--	--	A0A1Q9CUP1_SYMMI SubName: Full=Uncharacterized protein {ECO:0000313|EMBL:OLP86643.1};	--	--	--	--	--	--
Cluster-1527.75368	1.96	2.44	2.68	1.72	0.71	1.02	103.93	130.14	159.25	97.69	36.99	61.17	-1.03558	0.00590485	0.329881	1769	--	--	--	A0A1Q9DZ39_SYMMI SubName: Full=Uncharacterized protein {ECO:0000313|EMBL:OLQ00440.1};	--	GO:0016021,integral component of membrane; GO:0005575,cellular_component; GO:0016020,membrane; GO:0031224,intrinsic component of membrane; GO:0044425,membrane part	--	--	--	--
Cluster-1527.60510	0.67	0.91	1.94	0.76	0.54	0.41	40	55	130	49	32	28	-1.03427	0.0426874	0.621016	1967	--	--	--	--	--	--	--	--	--	--
Cluster-1527.31608	3.57	6.5	2.93	0	0	5.92	81.26	148.92	75.24	0	0	153.19	-1.03148	0.70217	0.982765	892	--	--	--	--	--	--	PT repeat	--	--	--
Cluster-1527.67456	0	1.96	0	1.01	0	0	0	81	0	44.52	0	0	-1.03027	1	1	1424	--	--	--	A0A1Q9DB15_SYMMI SubName: Full=Putative glycosidase {ECO:0000313|EMBL:OLP92309.1};	--	GO:0005576,extracellular region; GO:0016021,integral component of membrane; GO:0005524,ATP binding; GO:0030246,carbohydrate binding; GO:0003677,DNA binding; GO:0003918,DNA topoisomerase type II (ATP-hydrolyzing) activity; GO:0016798,hydrolase activity, acting on glycosyl bonds; GO:0015074,DNA integration; GO:0006310,DNA recombination; GO:0006265,DNA topological change; GO:0006811,ion transport; G…	--	--	--	--
Cluster-1527.29501	2.08	1.16	2.38	0.9	0.68	1.12	79.65	44.83	102.61	37.08	25.61	48.66	-1.03023	0.0190743	0.501838	1345	--	--	--	R1F9K0_EMIHU SubName: Full=Uncharacterized protein {ECO:0000313|EMBL:EOD35660.1, ECO:0000313|EnsemblProtists:EOD04463};	--	--	Exostosin family	--	--	--
Cluster-1527.47469	3.78	2.78	1.84	2.48	0.57	1.04	72.22	53.33	39.59	51.05	10.79	22.56	-1.02942	0.0832505	0.733716	785	--	--	--	--	--	--	Ankyrin repeats (3 copies)	--	--	--
Cluster-1527.37730	1.86	2.51	2.38	0	2.76	0.49	193.84	263.28	277.03	0	283.24	57.98	-1.02844	0.578292	0.97359	3259	K13448 calcium-binding protein CML | (RefSeq) probable calcium-binding protein CML13 (A)	Caltractin [Apostasia shenzhenica]	CML19_ARATH RecName: Full=Calcium-binding protein CML19 {ECO:0000303|Ref.7}; AltName: Full=Calmodulin-like protein 19 {ECO:0000303|Ref.7}; AltName: Full=Centrin 2 {ECO:0000303|PubMed:15155891}; Short=AtCEN2 {ECO:0000303|PubMed:15155891};	A0A1Q9EYP5_SYMMI SubName: Full=UDP-N-acetylglucosamine--peptide N-acetylglucosaminyltransferase 110 kDa subunit {ECO:0000313|EMBL:OLQ12505.1};	Ca2+-binding protein (centrin/caltractin), EF-Hand superfamily protein	GO:0005737,cytoplasm; GO:0005634,nucleus; GO:0005509,calcium ion binding; GO:0006281,DNA repair; GO:0003674,molecular_function; GO:0005488,binding; GO:0046872,metal ion binding; GO:0043167,ion binding; GO:0043169,cation binding; GO:0008152,metabolic process; GO:0006139,nucleobase-containing compound metabolic process; GO:0006259,DNA metabolic process; GO:0006725,cellular aromatic compound metabol…	EF-hand domain pair	--	--	--
Cluster-1527.58314	1.14	1.06	2.81	0.62	0.77	1	55.94	52.43	153.96	32.56	37.29	55.64	-1.02635	0.0426226	0.621016	1652	K01184 polygalacturonase [EC:3.2.1.15] | (RefSeq) probable polygalacturonase At3g15720 (A)	hypothetical protein PHAVU_001G266200g [Phaseolus vulgaris]	--	A0A1Q9CYR2_SYMMI SubName: Full=Endopolygalacturonase {ECO:0000313|EMBL:OLP88067.1};	--	GO:0016020,membrane; GO:0005525,GTP binding; GO:0004650,polygalacturonase activity; GO:0005975,carbohydrate metabolic process; GO:0000166,nucleotide binding; GO:0001882,nucleoside binding; GO:0001883,purine nucleoside binding; GO:0003674,molecular_function; GO:0005488,binding; GO:0017076,purine nucleotide binding; GO:0019001,guanyl nucleotide binding; GO:0032549,ribonucleoside binding; GO:0032550…	Glycosyl hydrolases family 28	--	--	--
Cluster-1527.22892	10.22	14.91	12.21	4.81	6.76	6.51	77	112	105	39	50	56	-1.02613	0.00323091	0.242274	448	--	--	--	--	--	--	7tm Chemosensory receptor	--	--	--
Cluster-1527.56923	6.91	1.66	0	3.45	0.31	0.58	202.51	49.04	0	108.7	8.87	19.22	-1.02549	0.60843	0.97686	1081	--	--	--	A0A0M0K1X6_9EUKA SubName: Full=Uncharacterized protein {ECO:0000313|EMBL:KOO32815.1};	--	--	--	--	--	--
Cluster-1527.12012	1.47	0.21	1.58	0.62	0.21	0.74	49.59	7.31	59.88	22.73	7.1	28.28	-1.0226	0.210731	0.870329	1213	K18208 renalase [EC:1.6.3.5] | (RefSeq) hypothetical protein (A)	hypothetical protein GPECTOR_1g103 [Gonium pectorale]	--	A0A1Q9CI07_SYMMI SubName: Full=Uncharacterized protein {ECO:0000313|EMBL:OLP82569.1};	--	GO:0003723,RNA binding; GO:0003674,molecular_function; GO:0003676,nucleic acid binding; GO:0005488,binding; GO:0097159,organic cyclic compound binding; GO:1901363,heterocyclic compound binding	--	--	--	--
Cluster-1527.5276	4.52	2.63	2.28	1.29	0.88	2.36	147	86	83	45	28	87	-1.01931	0.038977	0.608636	1174	K01090 protein phosphatase [EC:3.1.3.16] | (RefSeq) serine/threonine-protein phosphatase BSL1 (A)	hypothetical protein CHLRE_01g050850v5 [Chlamydomonas reinhardtii]	BSL2_ORYSJ RecName: Full=Serine/threonine-protein phosphatase BSL2 homolog; EC=3.1.3.16; AltName: Full=BSU1-like protein 2 homolog;	A0A1Q9CV85_SYMMI RecName: Full=Serine/threonine-protein phosphatase {ECO:0000256|RuleBase:RU004273}; EC=3.1.3.16 {ECO:0000256|RuleBase:RU004273};	Kelch repeat-containing proteins	GO:0005634,nucleus; GO:0046872,metal ion binding; GO:0004721,phosphoprotein phosphatase activity; GO:0009742,brassinosteroid mediated signaling pathway; GO:0003674,molecular_function; GO:0005488,binding; GO:0043167,ion binding; GO:0043169,cation binding; GO:0003824,catalytic activity; GO:0016787,hydrolase activity; GO:0016788,hydrolase activity, acting on ester bonds; GO:0016791,phosphatase activ…	Galactose oxidase, central domain	--	--	--
Cluster-1527.66316	0.83	1.39	2.02	0.96	0.48	0.62	31.69	53.4	86.46	39.58	18.03	26.97	-1.0193	0.0439895	0.624677	1340	K05284 GPI mannosyltransferase 1 subunit M [EC:2.4.1.-] | (RefSeq) GPI mannosyltransferase 1 isoform X1 (A)	GPI mannosyltransferase 1 isoform X1 [Phalaenopsis equestris]	PIGM_ARATH RecName: Full=GPI mannosyltransferase 1; EC=2.4.1.-; AltName: Full=GPI mannosyltransferase I; Short=GPI-MT-I; AltName: Full=Phosphatidylinositol-glycan biosynthesis class M protein; Short=PIG-M; AltName: Full=Protein PEANUT 1;	A0A1Q9F6H0_SYMMI SubName: Full=GPI mannosyltransferase 1 {ECO:0000313|EMBL:OLQ15257.1};	Mannosyltransferase	GO:0005789,endoplasmic reticulum membrane; GO:0016021,integral component of membrane; GO:0016758,transferase activity, transferring hexosyl groups; GO:0006506,GPI anchor biosynthetic process; GO:0003674,molecular_function; GO:0003824,catalytic activity; GO:0016740,transferase activity; GO:0016757,transferase activity, transferring glycosyl groups; GO:0008152,metabolic process; GO:0006464,cellular…	Mannosyltransferase (PIG-M)	--	--	--
Cluster-1527.15959	4.11	6.18	4.03	2.99	1.26	2.75	148.34	224.93	163.23	116.13	44.6	112.56	-1.014	0.00965472	0.394575	1280	K15407 queuine tRNA-ribosyltransferase accessory subunit | (RefSeq) tRNA-guanine transglycosylase (A)	predicted protein [Bathycoccus prasinos]	--	A0A1Q9D055_SYMMI SubName: Full=Putative RNA-binding protein C17H9.04c {ECO:0000313|EMBL:OLP88556.1};	--	--	Zn-finger in Ran binding protein and others	--	--	--
Cluster-1527.3143	0.99	1.48	1.68	1.02	0.44	0.6	28	42	53	31	12.23	19	-1.01384	0.0523279	0.657897	1048	--	--	--	A0A1Q9DDQ4_SYMMI SubName: Full=Reticulocyte-binding protein 2-like a {ECO:0000313|EMBL:OLP93318.1};	--	--	Sulfotransferase domain	--	--	--
Cluster-1527.44298	3.01	2.44	2.04	1.68	2.1	0	96.41	78.8	73.34	58.03	66.26	0	-1.01255	0.510687	0.964626	1161	--	--	--	--	--	--	MORN repeat	--	--	--
Cluster-1527.26815	0.92	1.4	2.33	0.19	0.65	1.38	25.6	38.95	72.64	5.74	17.73	43.25	-1.01027	0.1711	0.838084	1035	--	--	--	A0A1Q9CYH3_SYMMI SubName: Full=Protein PAM68, chloroplastic {ECO:0000313|EMBL:OLP87979.1};	--	GO:0016021,integral component of membrane; GO:0005575,cellular_component; GO:0016020,membrane; GO:0031224,intrinsic component of membrane; GO:0044425,membrane part	Protein of unknown function (DUF3464)	--	--	--
Cluster-1527.50054	0	2.52	0.76	0.28	1.36	0	0	108.01	36.28	12.9	56.83	0	-1.00755	0.701801	0.982765	1467	K08057 calreticulin | (RefSeq) hypothetical protein (A)	hypothetical protein GPECTOR_3g370 [Gonium pectorale]	CALR_CHLRE RecName: Full=Calreticulin; Flags: Precursor;	A0A0C4USK8_PROMN SubName: Full=Calreticulin 2 {ECO:0000313|EMBL:AIY60971.1};	Calreticulin	GO:0005788,endoplasmic reticulum lumen; GO:0005509,calcium ion binding; GO:0030246,carbohydrate binding; GO:0051082,unfolded protein binding; GO:0006457,protein folding; GO:0003674,molecular_function; GO:0005488,binding; GO:0046872,metal ion binding; GO:0043167,ion binding; GO:0043169,cation binding; GO:0005515,protein binding; GO:0008150,biological_process; GO:0009987,cellular process; GO:000562…	Calreticulin family	--	--	--
Cluster-1527.29539	2.4	3.65	2.69	2.1	0.8	1.4	60.33	92.18	76.08	56.86	19.74	40.01	-1.00617	0.0239573	0.534771	960	--	--	--	A0A1Q9D6T6_SYMMI SubName: Full=Uncharacterized protein {ECO:0000313|EMBL:OLP90826.1};	--	GO:0005524,ATP binding; GO:0016887,ATPase activity; GO:0045900,negative regulation of translational elongation; GO:0000166,nucleotide binding; GO:0003674,molecular_function; GO:0005488,binding; GO:0008144,drug binding; GO:0017076,purine nucleotide binding; GO:0030554,adenyl nucleotide binding; GO:0032553,ribonucleotide binding; GO:0032555,purine ribonucleotide binding; GO:0032559,adenyl ribonucle…	--	--	--	--
Cluster-1527.62734	7.08	7.95	10.5	3.38	6.18	3.17	35	39	60	18	30	18	-1.00517	0.040817	0.614253	372	--	--	--	--	--	--	--	--	--	--
Cluster-1527.69118	0.37	11.45	10.8	4.23	3.35	3.62	24.39	759.48	796.24	299.03	216.88	269.66	-1.00416	0.375903	0.934716	2143	--	--	--	A0A1Q9CTL2_SYMMI RecName: Full=Poly [ADP-ribose] polymerase {ECO:0000256|RuleBase:RU362114}; Short=PARP {ECO:0000256|RuleBase:RU362114}; EC=2.4.2.30 {ECO:0000256|RuleBase:RU362114}; EC=3.2.1.- {ECO:0000256|RuleBase:RU000489};	Ankyrin	GO:0005576,extracellular region; GO:0016021,integral component of membrane; GO:0008061,chitin binding; GO:0020037,heme binding; GO:0004553,hydrolase activity, hydrolyzing O-glycosyl compounds; GO:0046872,metal ion binding; GO:0003950,NAD+ ADP-ribosyltransferase activity; GO:0016491,oxidoreductase activity; GO:0031625,ubiquitin protein ligase binding; GO:0005975,carbohydrate metabolic process; GO:…	Poly(ADP-ribose) polymerase catalytic domain	--	--	--
Cluster-1527.28979	0.57	2.09	2.16	1.33	0.47	0.61	31.59	117.21	134.37	79.76	25.83	38.12	-1.00338	0.0895999	0.742962	1846	--	--	XB33_ARATH RecName: Full=E3 ubiquitin-protein ligase XBAT33; EC=2.3.2.27; AltName: Full=Ankyrin repeat domain and RING finger-containing protein XBAT33; AltName: Full=Protein XB3 homolog 3; AltName: Full=RING-type E3 ubiquitin transferase XBAT33;	A0A1Q9CF68_SYMMI SubName: Full=Uncharacterized protein {ECO:0000313|EMBL:OLP81551.1};	--	GO:0046872,metal ion binding; GO:0004842,ubiquitin-protein transferase activity; GO:0016567,protein ubiquitination; GO:0003674,molecular_function; GO:0005488,binding; GO:0043167,ion binding; GO:0043169,cation binding; GO:0003824,catalytic activity; GO:0016740,transferase activity; GO:0019787,ubiquitin-like protein transferase activity; GO:0140096,catalytic activity, acting on a protein; GO:000815…	Ankyrin repeats (3 copies)	--	--	--
Cluster-1527.18206	2.48	2.16	4.76	1.86	0.88	1.89	72	63	155	58	25	62	-1.00306	0.0353344	0.595891	1072	--	hypothetical protein CHLRE_01g028900v5 [Chlamydomonas reinhardtii]	--	--	--	--	--	--	--	--
Cluster-1527.72932	9.56	4.13	9.64	8.3	1.87	1.71	273.44	118.81	309.75	255.39	52.68	55.44	-1.00274	0.0873517	0.740279	1061	--	predicted protein [Micromonas pusilla CCMP1545]	--	A0A1E7FGP3_9STRA SubName: Full=Uncharacterized protein {ECO:0000313|EMBL:OEU17351.1};	--	GO:0016021,integral component of membrane; GO:0005575,cellular_component; GO:0016020,membrane; GO:0031224,intrinsic component of membrane; GO:0044425,membrane part	--	--	--	--
Cluster-1527.29951	2	3.33	5.38	2.61	1.69	1.08	82	137	247	115	68	50	-1.00081	0.0266221	0.552352	1419	--	--	--	A0A1Q9F4G3_SYMMI SubName: Full=Voltage-dependent P/Q-type calcium channel subunit alpha-1A {ECO:0000313|EMBL:OLQ14522.1};	--	GO:0016021,integral component of membrane; GO:0005509,calcium ion binding; GO:0005216,ion channel activity; GO:0003674,molecular_function; GO:0005488,binding; GO:0046872,metal ion binding; GO:0043167,ion binding; GO:0043169,cation binding; GO:0005215,transporter activity; GO:0022857,transmembrane transporter activity; GO:0015075,ion transmembrane transporter activity; GO:0015267,channel activity;…	--	--	--	--
Cluster-1527.72982	10.24	4.93	10.26	3.39	5.71	3.6	42	20	49	15	23	17	-0.999237	0.0713007	0.706704	347	--	hypothetical protein BVRB_025610 [Beta vulgaris subsp. vulgaris]	YCX91_PHAAO RecName: Full=Uncharacterized protein ORF91;	A0A0J8AZ36_BETVU SubName: Full=Uncharacterized protein {ECO:0000313|EMBL:KMS94019.1};	--	GO:0009507,chloroplast; GO:0005622,intracellular; GO:0005575,cellular_component; GO:0005623,cell; GO:0005737,cytoplasm; GO:0043231,intracellular membrane-bounded organelle; GO:0009536,plastid; GO:0043226,organelle; GO:0043227,membrane-bounded organelle; GO:0043229,intracellular organelle; GO:0044424,intracellular part; GO:0044444,cytoplasmic part; GO:0044464,cell part	--	--	--	--
Cluster-1527.17942	98.41	110.93	114.14	51.59	57.77	53	111	122	159	63	64	70	-0.997099	0.000296637	0.057894	249	--	--	--	--	--	--	--	--	--	--
Cluster-1527.64077	1.29	3.95	4.09	2.21	1.89	0.62	64.1	197.48	227.29	117.83	92.04	34.81	-0.996942	0.0679773	0.699745	1672	--	--	--	A0A1Q9D1V7_SYMMI SubName: Full=Uncharacterized protein {ECO:0000313|EMBL:OLP89170.1};	--	GO:0016021,integral component of membrane; GO:0005575,cellular_component; GO:0016020,membrane; GO:0031224,intrinsic component of membrane; GO:0044425,membrane part	Organic solute transporter Ostalpha	--	--	--
Cluster-1527.44919	4.71	7.82	3.96	4.49	0.15	3.6	252	421.82	237.21	257.99	7.86	218.12	-0.996755	0.375998	0.934812	1785	K01681 aconitate hydratase [EC:4.2.1.3] | (RefSeq) isocitrate dehydrogenase/citrate hydrolyase (A)	isocitrate dehydrogenase/citrate hydrolyase [Dorcoceras hygrometricum]	--	A0A0M0K898_9EUKA SubName: Full=Isocitrate dehydrogenase {ECO:0000313|EMBL:KOO35014.1};	--	GO:0004450,isocitrate dehydrogenase (NADP+) activity; GO:0006099,tricarboxylic acid cycle; GO:0003674,molecular_function; GO:0003824,catalytic activity; GO:0004448,isocitrate dehydrogenase activity; GO:0016491,oxidoreductase activity; GO:0016614,oxidoreductase activity, acting on CH-OH group of donors; GO:0016616,oxidoreductase activity, acting on the CH-OH group of donors, NAD or NADP as accepto…	Monomeric isocitrate dehydrogenase	--	--	--
Cluster-1527.52546	382.07	168.29	354.09	122.95	172.74	150.81	41937.2	18629.8	43486.2	14506.7	18647.1	18731.4	-0.994744	0.00122519	0.138088	3421	--	PREDICTED: uncharacterized protein LOC108867880 [Pyrus x bretschneideri]	--	A0A0R0GH50_SOYBN SubName: Full=Uncharacterized protein {ECO:0000313|EMBL:KRH17750.1};	--	--	--	--	--	--
Cluster-1527.80223	3.76	3.09	6.51	2.29	2.25	2.11	121	100	235	79	71	77	-0.994571	0.00514855	0.311373	1164	--	--	--	--	--	--	--	--	--	--
Cluster-1527.44777	677.87	308.25	593.42	194.05	296.27	287.14	52142.2	23904.1	51105.4	16045.2	22411.5	25001.5	-0.994426	0.0015412	0.160819	2466	--	hypothetical protein GLYMA_13G0132001, partial [Glycine max]	--	A0A0V0H283_SOLCH SubName: Full=Putative ovule protein {ECO:0000313|EMBL:JAP13563.1}; Flags: Fragment;	--	--	--	--	--	--
Cluster-1527.63808	3.5	0.91	2.24	0.78	1.41	1.08	113.24	29.54	81.35	27.1	44.91	39.69	-0.994344	0.0716547	0.708628	1171	--	--	--	A0A1Q9CJH6_SYMMI SubName: Full=Uncharacterized protein {ECO:0000313|EMBL:OLP83064.1};	--	--	--	--	--	--
Cluster-1527.13690	2.19	1.91	2.37	1.58	0.9	0.75	45.22	39.48	55.01	34.98	18.31	17.6	-0.993435	0.0297806	0.56927	829	--	PREDICTED: F-box/kelch-repeat protein At1g67480-like [Vigna angularis]	FBK28_ARATH RecName: Full=F-box/kelch-repeat protein At1g67480;	A0A0L9T4G4_PHAAN SubName: Full=Uncharacterized protein {ECO:0000313|EMBL:KOM25462.1};	FOG: Kelch repeat	GO:0031463,Cul3-RING ubiquitin ligase complex; GO:0016567,protein ubiquitination; GO:0008152,metabolic process; GO:0006464,cellular protein modification process; GO:0006807,nitrogen compound metabolic process; GO:0008150,biological_process; GO:0009987,cellular process; GO:0019538,protein metabolic process; GO:0032446,protein modification by small protein conjugation; GO:0036211,protein modificati…	Kelch motif	--	--	--
Cluster-1527.70434	0.46	0.72	0.7	2.69	2	11.1	7	11	12	44	30	192	3.13509	2.95923e-05	0.0133519	672	K07874 Ras-related protein Rab-1A | (RefSeq) Rab1b-2; rab family GTPase (A)	rab family GTPase [Selaginella moellendorffii]	YPTC1_CHLRE RecName: Full=GTP-binding protein YPTC1;	A0A1D1YYS0_9ARAE SubName: Full=GTP-binding protein ypt1 {ECO:0000313|EMBL:JAT59790.1};	GTPase Rab1/YPT1, small G protein superfamily, and related GTP-binding proteins	GO:0005886,plasma membrane; GO:0005525,GTP binding; GO:0003924,GTPase activity; GO:0015031,protein transport; GO:0000166,nucleotide binding; GO:0001882,nucleoside binding; GO:0001883,purine nucleoside binding; GO:0003674,molecular_function; GO:0005488,binding; GO:0017076,purine nucleotide binding; GO:0019001,guanyl nucleotide binding; GO:0032549,ribonucleoside binding; GO:0032550,purine ribonucle…	Ras family	--	--	--
Cluster-1527.65820	6.54	0	4.14	0	0	4.97	318.16	0	225.8	0	0.02	273.9	-0.991931	0.790098	0.987785	1643	--	--	--	A0A1Q9CAQ3_SYMMI SubName: Full=Uncharacterized protein {ECO:0000313|EMBL:OLP80013.1};	--	GO:0016021,integral component of membrane; GO:0005575,cellular_component; GO:0016020,membrane; GO:0031224,intrinsic component of membrane; GO:0044425,membrane part	--	--	--	--
Cluster-1527.39417	0.33	1.09	0.11	0.04	0.45	0.26	27.6	91.98	9.85	3.92	37.39	24.98	-0.990643	0.300136	0.911816	2666	K14510 serine/threonine-protein kinase CTR1 [EC:2.7.11.1] | (RefSeq) serine/threonine-protein kinase CTR1-like (A)	BnaC05g02740D [Brassica napus]	CTR1_ARATH RecName: Full=Serine/threonine-protein kinase CTR1 {ECO:0000303|PubMed:8431946}; EC=2.7.11.1 {ECO:0000305}; AltName: Full=Protein CONSTITUTIVE TRIPLE RESPONSE1 {ECO:0000303|PubMed:8431946};	A0A1Q9DKQ9_SYMMI RecName: Full=Alpha-galactosidase {ECO:0000256|RuleBase:RU361168}; EC=3.2.1.22 {ECO:0000256|RuleBase:RU361168}; AltName: Full=Melibiase {ECO:0000256|RuleBase:RU361168};	Tyrosine kinase specific for activated (GTP-bound) p21cdc42Hs	GO:0005789,endoplasmic reticulum membrane; GO:0005524,ATP binding; GO:0004674,protein serine/threonine kinase activity; GO:0004712,protein serine/threonine/tyrosine kinase activity; GO:0004871,NA; GO:0071281,cellular response to iron ion; GO:0009873,ethylene-activated signaling pathway; GO:0009686,gibberellin biosynthetic process; GO:0010105,negative regulation of ethylene-activated signaling pat…	Protein kinase domain	--	--	--
Cluster-1527.50539	132.97	85.08	129.51	47.29	88	38.75	6259	4034	6834	2393	4073	2066	-0.987077	0.00192145	0.180372	1598	K02704 photosystem II CP47 chlorophyll apoprotein | (RefSeq) [pt] photosystem II PsbB protein (A)	CP47 chlorophyll apoprotein of photosystem II (chloroplast) [Mesotaenium endlicherianum]	PSBB_GUITH RecName: Full=Photosystem II CP47 reaction center protein {ECO:0000255|HAMAP-Rule:MF_01495}; AltName: Full=PSII 47 kDa protein {ECO:0000255|HAMAP-Rule:MF_01495}; AltName: Full=Protein CP-47 {ECO:0000255|HAMAP-Rule:MF_01495};	Q9XQV0_HETTR RecName: Full=Photosystem II CP47 reaction center protein {ECO:0000256|HAMAP-Rule:MF_01495, ECO:0000256|SAAS:SAAS00200267}; AltName: Full=PSII 47 kDa protein {ECO:0000256|HAMAP-Rule:MF_01495}; AltName: Full=Protein CP-47 {ECO:0000256|HAMAP-Rule:MF_01495};	--	GO:0009535,chloroplast thylakoid membrane; GO:0016021,integral component of membrane; GO:0009523,photosystem II; GO:0016168,chlorophyll binding; GO:0045156,electron transporter, transferring electrons within the cyclic electron transport pathway of photosynthesis activity; GO:0009772,photosynthetic electron transport in photosystem II; GO:0018298,protein-chromophore linkage; GO:0003674,molecular_…	Photosystem II protein	--	--	--
Cluster-1527.41592	18.63	28.08	26.35	11.14	16.2	9.37	259.91	392.8	415.59	167.17	222.12	148.73	-0.986894	0.00060408	0.0900854	635	--	--	--	--	--	--	Zinc finger C-x8-C-x5-C-x3-H type (and similar)	C3H	TF	C3H
Cluster-1527.35547	3.34	1.91	3.99	1.75	1.33	1.56	81.86	47.04	109.95	46.06	32.12	43.33	-0.986554	0.0155452	0.467844	941	--	--	--	--	--	--	--	--	--	--
Cluster-1527.19265	1.11	1.79	1.91	8.03	6.11	25.7	5	8	10	39	27	133	3.10346	2.59311e-05	0.0123139	359	K02917 large subunit ribosomal protein L35Ae | (RefSeq) 60S ribosomal protein L35a-4 (A)	60S ribosomal protein L35a-4 [Auxenochlorella protothecoides]	R35A3_ARATH RecName: Full=60S ribosomal protein L35a-3;	A0A0N7L3X7_9STRA SubName: Full=Dead deah box helicase {ECO:0000313|EMBL:CEG37107.1};	60S ribosomal protein L35A/L37	GO:0022625,cytosolic large ribosomal subunit; GO:0003735,structural constituent of ribosome; GO:0002181,cytoplasmic translation; GO:0042273,ribosomal large subunit biogenesis; GO:0003674,molecular_function; GO:0005198,structural molecule activity; GO:0008152,metabolic process; GO:0006412,translation; GO:0006518,peptide metabolic process; GO:0006807,nitrogen compound metabolic process; GO:0008150,…	Ribosomal protein L35Ae	--	--	--
Cluster-1527.75433	1.74	1.43	0	0.27	0.49	0.79	89.31	74.13	0	15.11	24.74	46.03	-0.983572	0.391824	0.939079	1726	--	--	--	--	--	--	BTB/POZ domain	TRAF	TR	TRAF
Cluster-1527.44046	3.61	6.82	6.23	1.72	1.93	4.52	258.29	492.08	499.67	132.36	136.28	366.74	-0.98245	0.0258157	0.547032	2312	--	--	--	A0A1E7FC70_9STRA SubName: Full=Periplasmic binding protein-like I {ECO:0000313|EMBL:OEU15403.1};	--	--	Periplasmic binding protein domain	--	--	--
Cluster-1527.36089	6.36	6.84	4.11	3.2	2.62	2.9	242.6	262.54	176.01	131.3	98.09	125.48	-0.982293	0.000586853	0.0880065	1338	--	--	--	A0A1Q9DAQ0_SYMMI SubName: Full=Uncharacterized protein {ECO:0000313|EMBL:OLP92210.1};	--	--	--	--	--	--
Cluster-1527.34838	2.7	0.49	3.82	1.97	0.34	1.23	248.26	45.4	392.19	194.35	30.43	128.33	-0.980466	0.165075	0.832736	2900	--	hypothetical protein CHLRE_01g034200v5 [Chlamydomonas reinhardtii]	--	R1BVQ1_EMIHU SubName: Full=Uncharacterized protein {ECO:0000313|EMBL:EOD13817.1, ECO:0000313|EnsemblProtists:EOD13817};	--	GO:0016021,integral component of membrane; GO:0005575,cellular_component; GO:0016020,membrane; GO:0031224,intrinsic component of membrane; GO:0044425,membrane part	Bacterial extracellular solute-binding protein	--	--	--
Cluster-1527.79530	0.38	0.54	0.63	2.6	0.89	9	9	13	17	67	21	245	3.07756	8.48052e-05	0.0251646	927	K07200 5'-AMP-activated protein kinase, regulatory gamma subunit | (RefSeq) hypothetical protein (A)	PREDICTED: SNF1-related protein kinase regulatory subunit gamma-like PV42a [Phoenix dactylifera]	PV42A_ARATH RecName: Full=SNF1-related protein kinase regulatory subunit gamma-like PV42a; Short=AtPV42a; AltName: Full=AKIN subunit gamma-like PV42a; AltName: Full=CBS domain-containing protein CBSCBS4;	B5A4K2_GYMST SubName: Full=Putative SNF4 kinase-activating protein {ECO:0000313|EMBL:ACF24554.1};	5'-AMP-activated protein kinase, gamma subunit	GO:0003006,developmental process involved in reproduction; GO:0009553,embryo sac development; GO:0009555,pollen development; GO:0010183,pollen tube guidance; GO:0048443,stamen development; GO:0000003,reproduction; GO:0008150,biological_process; GO:0022414,reproductive process; GO:0032502,developmental process; GO:0007275,multicellular organism development; GO:0032501,multicellular organismal proc…	CBS domain	--	--	--
Cluster-1527.69364	3.43	2.52	3.81	2.51	1.32	1.14	135	100	168	106	51	51	-0.978899	0.00817828	0.372174	1373	--	--	--	--	--	--	--	--	--	--
Cluster-1527.42115	61.68	75.1	65.6	36.65	45.97	20.25	2650.64	3250.57	3161.59	1693.2	1942.95	985.77	-0.977809	0.000368944	0.0664328	1479	K01674 carbonic anhydrase [EC:4.2.1.1] | (RefSeq) alpha carbonic anhydrase 7-like (A)	PREDICTED: alpha carbonic anhydrase 7-like [Pyrus x bretschneideri]	ATCA7_ARATH RecName: Full=Alpha carbonic anhydrase 7; Short=AtaCA7; Short=AtalphaCA7; EC=4.2.1.1; AltName: Full=Alpha carbonate dehydratase 7; Flags: Precursor;	R1DAV9_EMIHU SubName: Full=Alpha-type carbonic anhydrase {ECO:0000313|EMBL:EOD32568.1}; Flags: Fragment;	Carbonic anhydrase	GO:0009570,chloroplast stroma; GO:0004089,carbonate dehydratase activity; GO:0008270,zinc ion binding; GO:0006730,one-carbon metabolic process; GO:0003674,molecular_function; GO:0003824,catalytic activity; GO:0016829,lyase activity; GO:0016835,carbon-oxygen lyase activity; GO:0016836,hydro-lyase activity; GO:0005488,binding; GO:0046872,metal ion binding; GO:0043167,ion binding; GO:0043169,cation …	Eukaryotic-type carbonic anhydrase	--	--	--
Cluster-1527.41688	32	63.1	38.36	18.47	26.88	21.89	40	77	59	25	33	32	-0.976498	0.0281614	0.560595	254	--	--	--	--	--	--	--	--	--	--
Cluster-1527.61212	4.52	3.71	3.89	2.24	2.14	1.76	45	37	44	24	21	20	-0.97128	0.0225672	0.529611	519	--	--	--	A0A1Q9EUC1_SYMMI SubName: Full=Retrovirus-related Pol polyprotein from type-1 retrotransposable element R2 {ECO:0000313|EMBL:OLQ11025.1};	--	GO:0003676,nucleic acid binding; GO:0036459,thiol-dependent ubiquitinyl hydrolase activity; GO:0016579,protein deubiquitination; GO:0003674,molecular_function; GO:0005488,binding; GO:0097159,organic cyclic compound binding; GO:1901363,heterocyclic compound binding; GO:0003824,catalytic activity; GO:0008234,cysteine-type peptidase activity; GO:0008233,peptidase activity; GO:0070011,peptidase activ…	RNA recognition motif. (a.k.a. RRM, RBD, or RNP domain)	--	--	--
Cluster-1527.45137	24.8	33.89	33.79	15.68	19.75	11.77	110	149	174	75	86	60	-0.970702	0.00168857	0.167304	357	--	--	--	--	--	--	--	--	--	--
Cluster-1527.58269	0.47	1.11	0.47	0.14	0	0.85	23.63	56.99	26.8	7.56	0	48.82	-0.970175	0.399852	0.940707	1706	--	--	--	--	--	--	--	--	--	--
Cluster-1527.41108	0.84	0.61	0.91	0.42	0.29	0.48	94.38	68.63	113.83	50.53	31.46	60.6	-0.968797	0.00918375	0.387363	3484	--	hypothetical protein AQUCO_01600088v1 [Aquilegia coerulea]	--	A0A1Q9CM42_SYMMI SubName: Full=Uncharacterized protein {ECO:0000313|EMBL:OLP83980.1};	--	GO:0016021,integral component of membrane; GO:0003723,RNA binding; GO:0003674,molecular_function; GO:0003676,nucleic acid binding; GO:0005488,binding; GO:0097159,organic cyclic compound binding; GO:1901363,heterocyclic compound binding; GO:0005575,cellular_component; GO:0016020,membrane; GO:0031224,intrinsic component of membrane; GO:0044425,membrane part	Domain of unknown function (DUF2828)	--	--	--
Cluster-1527.85999	0	0.94	1.94	0.62	0.34	0.51	0	57	131.65	40.18	19.96	35	-0.965753	0.385262	0.937998	1988	--	--	--	--	--	--	--	--	--	--
Cluster-1527.20904	1.31	1.17	1.65	0.59	1.14	0.38	208.37	187.22	293.46	99.95	178.48	69.22	-0.964192	0.0159972	0.474912	4851	K24680 protein dispatched 1 | (RefSeq) Sterol-sensing domain (A)	Sterol-sensing domain [Ostreococcus tauri]	--	A0A1Q9E9E4_SYMMI SubName: Full=Patched domain-containing protein 2 {ECO:0000313|EMBL:OLQ04043.1};	Predicted patched transmembrane receptor	GO:0016021,integral component of membrane; GO:0007224,smoothened signaling pathway; GO:0007165,signal transduction; GO:0007154,cell communication; GO:0007166,cell surface receptor signaling pathway; GO:0008150,biological_process; GO:0009987,cellular process; GO:0023052,signaling; GO:0050789,regulation of biological process; GO:0050794,regulation of cellular process; GO:0050896,response to stimulu…	Patched family	--	--	--
Cluster-1527.56555	11.95	13.42	0	0	0	12.16	293.76	331.74	0	0	0	338.97	-0.962786	0.796112	0.988303	944	--	--	--	--	--	--	--	--	--	--
Cluster-1527.74889	0.17	0	0.27	0.22	0.01	0	33.1	0	56.92	46.02	1.75	0	-0.961887	0.714106	0.983948	5774	--	--	--	A0A1Q9DKC3_SYMMI SubName: Full=UDP-N-acetylglucosamine transporter {ECO:0000313|EMBL:OLP95599.1};	--	GO:0005789,endoplasmic reticulum membrane; GO:0000139,Golgi membrane; GO:0016021,integral component of membrane; GO:0005509,calcium ion binding; GO:0005351,carbohydrate:proton symporter activity; GO:0016758,transferase activity, transferring hexosyl groups; GO:0003674,molecular_function; GO:0005488,binding; GO:0046872,metal ion binding; GO:0043167,ion binding; GO:0043169,cation binding; GO:000521…	NACHT domain	--	--	--
Cluster-1527.57794	0.68	0.05	1.89	0.8	0.07	0.47	39.46	2.74	122.2	49.48	3.92	30.92	-0.961397	0.362044	0.930993	1905	--	--	--	A0A1Q9F4G3_SYMMI SubName: Full=Voltage-dependent P/Q-type calcium channel subunit alpha-1A {ECO:0000313|EMBL:OLQ14522.1};	--	GO:0016021,integral component of membrane; GO:0005509,calcium ion binding; GO:0005216,ion channel activity; GO:0003674,molecular_function; GO:0005488,binding; GO:0046872,metal ion binding; GO:0043167,ion binding; GO:0043169,cation binding; GO:0005215,transporter activity; GO:0022857,transmembrane transporter activity; GO:0015075,ion transmembrane transporter activity; GO:0015267,channel activity;…	Ion transport protein	--	--	--
Cluster-1527.20480	6.54	5.24	6.11	3.32	3.22	2.49	38.31	30.51	41.19	20.94	18.54	16.7	-0.960662	0.0344792	0.589307	399	--	--	--	--	--	--	--	--	--	--
Cluster-1527.35907	5.81	8.33	7.32	2.5	3.31	4.96	123.36	177.9	175.03	57.15	69.12	119.56	-0.958786	0.00966175	0.394575	847	--	--	--	A0A1Q9EW08_SYMMI SubName: Full=Homeobox protein Wariai {ECO:0000313|EMBL:OLQ11610.1};	--	GO:0003677,DNA binding; GO:0003674,molecular_function; GO:0003676,nucleic acid binding; GO:0005488,binding; GO:0097159,organic cyclic compound binding; GO:1901363,heterocyclic compound binding	--	--	--	--
Cluster-1527.82715	12.98	15.37	15.8	6.46	9.3	6.94	85.78	101.15	119.62	45.96	60.38	52.5	-0.958249	0.0025986	0.214375	421	--	--	--	A0A1Q9CCQ3_SYMMI SubName: Full=Uncharacterized protein {ECO:0000313|EMBL:OLP80617.1};	--	--	--	--	--	--
Cluster-1527.30416	1.42	0.91	0.78	0.54	0.32	0.72	69.18	44.52	42.59	28.17	15.38	39.92	-0.95789	0.0590407	0.677948	1643	--	--	--	--	--	--	PPR repeat family	--	--	--
Cluster-1527.78786	4.47	5.3	4.35	2.64	3.25	1.4	113.04	134.75	123.75	71.73	80.86	40.12	-0.957582	0.00804376	0.369424	965	K17579 protein phosphatase 1 regulatory subunit 42 | (RefSeq) hypothetical protein (A)	Protein MEI2-like 2 [Tetrabaena socialis]	OML5_ORYSJ RecName: Full=Protein MEI2-like 5; Short=OML5; AltName: Full=MEI2-like protein 5;	A0A024UJH1_9STRA SubName: Full=Uncharacterized protein {ECO:0000313|EMBL:ETW06596.1};	Protein Mei2, essential for commitment to meiosis, and related proteins	GO:0003723,RNA binding; GO:0003674,molecular_function; GO:0003676,nucleic acid binding; GO:0005488,binding; GO:0097159,organic cyclic compound binding; GO:1901363,heterocyclic compound binding	RNA recognition motif 2	--	--	--
Cluster-1527.27994	1.38	3.68	4.8	2.27	1.52	1.3	58.08	156.25	227.03	103.04	63.13	62.03	-0.9535	0.0439604	0.624677	1455	--	--	--	--	--	--	--	--	--	--
Cluster-1527.41794	3.21	1.24	2.28	1.55	0.72	1.17	243.86	94.73	193.83	126.74	53.5	100.56	-0.952491	0.0256263	0.546544	2438	--	hypothetical protein KFL_000180250 [Klebsormidium nitens]	--	A0A1Q9CN24_SYMMI RecName: Full=Poly [ADP-ribose] polymerase {ECO:0000256|RuleBase:RU362114}; Short=PARP {ECO:0000256|RuleBase:RU362114}; EC=2.4.2.30 {ECO:0000256|RuleBase:RU362114};	Ankyrin	GO:0003950,NAD+ ADP-ribosyltransferase activity; GO:0003674,molecular_function; GO:0003824,catalytic activity; GO:0016740,transferase activity; GO:0016757,transferase activity, transferring glycosyl groups; GO:0016763,transferase activity, transferring pentosyl groups	Poly(ADP-ribose) polymerase catalytic domain	--	--	--
Cluster-1527.45552	15.89	10.68	14.45	3.08	9.8	7.82	972.04	658.41	990.41	202.74	589.62	541.78	-0.950447	0.0174329	0.487623	2008	K03283 heat shock 70kDa protein 1/2/6/8 | (RefSeq) heat shock 70 kDa protein (A)	heat shock 70 kDa protein [Carica papaya]	HSP70_ACHKL RecName: Full=Heat shock 70 kDa protein;	J7F388_PROMN SubName: Full=Heat shock protein 70 {ECO:0000313|EMBL:AEV66161.1};	Molecular chaperones HSP70/HSC70, HSP70 superfamily	GO:0005524,ATP binding; GO:0000166,nucleotide binding; GO:0003674,molecular_function; GO:0005488,binding; GO:0008144,drug binding; GO:0017076,purine nucleotide binding; GO:0030554,adenyl nucleotide binding; GO:0032553,ribonucleotide binding; GO:0032555,purine ribonucleotide binding; GO:0032559,adenyl ribonucleotide binding; GO:0035639,purine ribonucleoside triphosphate binding; GO:0036094,small m…	Hsp70 protein	--	--	--
Cluster-1527.18016	1.45	1.16	0.96	1.31	0.34	0.22	44.81	36.02	33.24	43.64	10.42	7.72	-0.950181	0.176363	0.843546	1128	--	--	--	--	--	--	--	--	--	--
Cluster-1527.76863	2.54	0	0	0	1.31	0	91.43	0	0	0	46.17	0	-0.949625	1	1	1274	K01624 fructose-bisphosphate aldolase, class II [EC:4.1.2.13] | (RefSeq) fructose-bisphosphate aldolase 1-like (A)	fructose-bisphosphate aldolase 1 [Quercus suber]	--	X2D9N9_PYRLU SubName: Full=Class II fructose-1,6-bisphosphate aldolase {ECO:0000313|EMBL:AHK23679.1}; EC=4.1.2.13 {ECO:0000313|EMBL:AHK23679.1};	Fructose 1,6-bisphosphate aldolase	GO:0004332,fructose-bisphosphate aldolase activity; GO:0008270,zinc ion binding; GO:0006096,glycolytic process; GO:0003674,molecular_function; GO:0003824,catalytic activity; GO:0016829,lyase activity; GO:0016830,carbon-carbon lyase activity; GO:0016832,aldehyde-lyase activity; GO:0005488,binding; GO:0046872,metal ion binding; GO:0043167,ion binding; GO:0043169,cation binding; GO:0046914,transitio…	Fructose-bisphosphate aldolase class-II	--	--	--
Cluster-1527.42092	0.71	3.15	0.84	0.01	1.05	1.31	27.83	123.62	36.87	0.44	40.35	57.86	-0.949097	0.567	0.972563	1363	K01624 fructose-bisphosphate aldolase, class II [EC:4.1.2.13] | (RefSeq) Fructose-bisphosphate aldolase, class II,yeast/E. coli subtype (A)	hypothetical protein CEUSTIGMA_g5534.t1 [Chlamydomonas eustigma]	--	X2D8N9_LINPO SubName: Full=Class II fructose-1,6-bisphosphate aldolase {ECO:0000313|EMBL:AHK23681.1}; EC=4.1.2.13 {ECO:0000313|EMBL:AHK23681.1};	Fructose 1,6-bisphosphate aldolase	GO:0004332,fructose-bisphosphate aldolase activity; GO:0008270,zinc ion binding; GO:0006096,glycolytic process; GO:0003674,molecular_function; GO:0003824,catalytic activity; GO:0016829,lyase activity; GO:0016830,carbon-carbon lyase activity; GO:0016832,aldehyde-lyase activity; GO:0005488,binding; GO:0046872,metal ion binding; GO:0043167,ion binding; GO:0043169,cation binding; GO:0046914,transitio…	Fructose-bisphosphate aldolase class-II	--	--	--
Cluster-1527.31289	6.69	5.55	3.25	2.69	3.8	1.56	265.69	221.86	144.68	114.96	148.5	70.09	-0.948855	0.0178432	0.489473	1384	--	--	--	--	--	--	Ankyrin repeats (3 copies)	--	--	--
Cluster-1527.42901	5.61	4.81	3.53	2.95	3.42	0.93	596.49	515.69	420.28	337.15	357.36	111.52	-0.947827	0.0231516	0.530994	3321	K10859 DNA oxidative demethylase [EC:1.14.11.33] | (RefSeq) DNA oxidative demethylase ALKBH2 (A)	hypothetical protein CISIN_1g025478mg [Citrus sinensis]	ALKB2_ARATH RecName: Full=DNA oxidative demethylase ALKBH2; EC=1.14.11.33; AltName: Full=Alkylated DNA repair protein alkB homolog 2; AltName: Full=Alpha-ketoglutarate-dependent dioxygenase alkB homolog 2;	A0A1Q9DCU5_SYMMI SubName: Full=Echinoderm microtubule-associated protein-like 4 {ECO:0000313|EMBL:OLP93034.1};	--	GO:0005634,nucleus; GO:0103053,1-ethyladenine demethylase activity; GO:0035514,DNA demethylase activity; GO:0046872,metal ion binding; GO:0006281,DNA repair; GO:0003674,molecular_function; GO:0003824,catalytic activity; GO:0016491,oxidoreductase activity; GO:0016705,oxidoreductase activity, acting on paired donors, with incorporation or reduction of molecular oxygen; GO:0016706,oxidoreductase act…	2OG-Fe(II) oxygenase superfamily	--	--	--
Cluster-1527.58116	0.72	1.02	0.61	0.25	0.6	0.36	53.47	77	51.1	20.03	43.92	30.35	-0.947482	0.052441	0.657897	2401	--	--	--	A0A1Q9D1S1_SYMMI RecName: Full=Poly [ADP-ribose] polymerase {ECO:0000256|RuleBase:RU362114}; Short=PARP {ECO:0000256|RuleBase:RU362114}; EC=2.4.2.30 {ECO:0000256|RuleBase:RU362114};	--	GO:0003950,NAD+ ADP-ribosyltransferase activity; GO:0003674,molecular_function; GO:0003824,catalytic activity; GO:0016740,transferase activity; GO:0016757,transferase activity, transferring glycosyl groups; GO:0016763,transferase activity, transferring pentosyl groups	Poly(ADP-ribose) polymerase catalytic domain	--	--	--
Cluster-1527.62647	2.9	1.31	1.81	0.18	1.12	1.71	142.15	64.57	99.64	9.4	53.99	94.96	-0.947356	0.177578	0.84443	1654	K09588 cytochrome P450 family 90 subfamily A1 [EC:1.14.-.-] | (RefSeq) cytochrome P450 90A4 (A)	hypothetical protein AXG93_4368s1500 [Marchantia polymorpha subsp. ruderalis]	C7A15_ARATH RecName: Full=Cytochrome P450 72A15; EC=1.14.-.-;	A0A1Q9EHZ0_SYMMI SubName: Full=Cytochrome P450 85A {ECO:0000313|EMBL:OLQ07063.1};	Cytochrome P450 CYP4/CYP19/CYP26 subfamilies	GO:0016021,integral component of membrane; GO:0020037,heme binding; GO:0005506,iron ion binding; GO:0004497,monooxygenase activity; GO:0016705,oxidoreductase activity, acting on paired donors, with incorporation or reduction of molecular oxygen; GO:0003674,molecular_function; GO:0005488,binding; GO:0046906,tetrapyrrole binding; GO:0048037,cofactor binding; GO:0097159,organic cyclic compound bindi…	Cytochrome P450	--	--	--
Cluster-1527.45144	3.53	1.38	0	1.4	1.2	0	88.81	35	0	37.94	29.61	0	-0.947136	0.706809	0.9831	960	--	--	--	--	--	--	--	--	--	--
Cluster-1527.21861	1.37	0.85	0.6	0.47	0.71	0.28	77.26	48.22	38.24	28.62	39.34	17.71	-0.942403	0.0730968	0.711635	1874	--	--	--	--	--	--	RNA recognition motif 2	--	--	--
Cluster-1527.29436	3	4.62	2.21	1.4	2.07	1.6	62.71	97.24	52.11	31.46	42.69	38.12	-0.941461	0.0323286	0.580319	838	--	--	--	--	--	--	--	--	--	--
Cluster-1527.12805	4.71	2.85	2.36	0.83	1.1	3.02	145.27	88.34	81.78	27.54	33.29	105.53	-0.94123	0.0986798	0.756559	1126	--	--	--	A0A1Q9EJG8_SYMMI SubName: Full=Dynein heavy chain 7, axonemal {ECO:0000313|EMBL:OLQ07596.1};	--	GO:0030286,dynein complex; GO:0016021,integral component of membrane; GO:0005524,ATP binding; GO:0003777,microtubule motor activity; GO:0007018,microtubule-based movement; GO:0000166,nucleotide binding; GO:0003674,molecular_function; GO:0005488,binding; GO:0008144,drug binding; GO:0017076,purine nucleotide binding; GO:0030554,adenyl nucleotide binding; GO:0032553,ribonucleotide binding; GO:003255…	Putative SAM-dependent RNA methyltransferase	--	--	--
Cluster-1527.15800	5.66	2.53	3.39	0.73	2.6	2.54	218.16	98.21	146.39	30.12	98.42	110.85	-0.940919	0.0775821	0.723452	1350	--	--	--	--	--	--	IQ calmodulin-binding motif	--	--	--
Cluster-1527.69882	1.83	1.22	1.55	0.71	0.89	0.79	120.75	81.16	114.68	50.32	57.43	59.16	-0.940469	0.00346653	0.252122	2147	K00234 succinate dehydrogenase (ubiquinone) flavoprotein subunit [EC:1.3.5.1] | (RefSeq) SDH2; succinate dehydrogenase (A)	succinate dehydrogenase [Micromonas commoda]	SDHA_ORYSJ RecName: Full=Succinate dehydrogenase [ubiquinone] flavoprotein subunit, mitochondrial; EC=1.3.5.1 {ECO:0000250|UniProtKB:P31040}; AltName: Full=Flavoprotein subunit of complex II; Short=FP; Flags: Precursor;	A0A1Q9DWV2_SYMMI RecName: Full=Succinate dehydrogenase [ubiquinone] flavoprotein subunit, mitochondrial {ECO:0000256|RuleBase:RU362051}; EC=1.3.5.1 {ECO:0000256|RuleBase:RU362051};	Succinate dehydrogenase, flavoprotein subunit	GO:0005749,mitochondrial respiratory chain complex II, succinate dehydrogenase complex (ubiquinone); GO:0045273,respiratory chain complex II; GO:0009055,electron transfer activity; GO:0050660,flavin adenine dinucleotide binding; GO:0008177,succinate dehydrogenase (ubiquinone) activity; GO:0000104,succinate dehydrogenase activity; GO:0009061,anaerobic respiration; GO:0006121,mitochondrial electron…	Fumarate reductase flavoprotein C-term	--	--	--
Cluster-1527.66684	9.16	2.64	11.03	6.07	2.28	3.59	49	14	68	35	12	22	-0.938721	0.15831	0.828105	384	--	hypothetical protein BVRB_033130, partial [Beta vulgaris subsp. vulgaris]	--	A0A0V0H109_SOLCH SubName: Full=Putative ovule protein {ECO:0000313|EMBL:JAP14036.1};	--	--	--	--	--	--
Cluster-1527.6057	3.64	2.68	3.81	2.18	1.17	1.89	73	54	86	47	23	43	-0.936355	0.018771	0.497668	812	--	--	--	A0A1Q9DGG9_SYMMI SubName: Full=Uncharacterized protein {ECO:0000313|EMBL:OLP94281.1};	--	GO:0016021,integral component of membrane; GO:0005575,cellular_component; GO:0016020,membrane; GO:0031224,intrinsic component of membrane; GO:0044425,membrane part	--	--	--	--
Cluster-1527.20227	1.83	1.2	0.68	1.24	0.47	0.27	71.92	47.26	29.72	52.14	17.99	12.04	-0.935537	0.151148	0.820111	1370	--	--	--	--	--	--	--	--	--	--
Cluster-1527.26702	3.75	2.7	4.18	2.31	2.22	1.08	355.59	258.58	443.93	235.26	207.15	115.49	-0.93113	0.00355205	0.254418	2986	K05658 ATP-binding cassette, subfamily B (MDR/TAP), member 1 [EC:7.6.2.2] | (RefSeq) ABC transporter B family member 17 (A)	hypothetical protein CARUB_v10019333mg [Capsella rubella]	AB17B_ARATH RecName: Full=ABC transporter B family member 17; Short=ABC transporter ABCB.17; Short=AtABCB17; AltName: Full=P-glycoprotein 17; AltName: Full=Putative multidrug resistance protein 19;	A0A1Q9CI49_SYMMI SubName: Full=Sulfate/thiosulfate import ATP-binding protein CysA {ECO:0000313|EMBL:OLP82527.1};	Multidrug/pheromone exporter, ABC superfamily	GO:0016021,integral component of membrane; GO:0005886,plasma membrane; GO:0009506,plasmodesma; GO:0005524,ATP binding; GO:0042626,ATPase activity, coupled to transmembrane movement of substances; GO:0000166,nucleotide binding; GO:0003674,molecular_function; GO:0005488,binding; GO:0008144,drug binding; GO:0017076,purine nucleotide binding; GO:0030554,adenyl nucleotide binding; GO:0032553,ribonucle…	Calx-beta domain	--	--	--
Cluster-1527.13656	2.8	4.32	3.19	0.97	1.78	2.53	48.58	75.32	62.49	18.07	30.42	49.86	-0.930619	0.0622066	0.684834	734	--	--	--	--	--	--	--	--	--	--
Cluster-1527.48071	14.34	4.89	11.24	4.09	7.6	4.12	149.27	50.9	132.82	45.77	77.82	48.91	-0.929969	0.0543921	0.664869	532	--	hypothetical protein BVRB_025610 [Beta vulgaris subsp. vulgaris]	YCX91_PHAAO RecName: Full=Uncharacterized protein ORF91;	A0A0J8AZ36_BETVU SubName: Full=Uncharacterized protein {ECO:0000313|EMBL:KMS94019.1};	--	GO:0009507,chloroplast; GO:0005622,intracellular; GO:0005575,cellular_component; GO:0005623,cell; GO:0005737,cytoplasm; GO:0043231,intracellular membrane-bounded organelle; GO:0009536,plastid; GO:0043226,organelle; GO:0043227,membrane-bounded organelle; GO:0043229,intracellular organelle; GO:0044424,intracellular part; GO:0044444,cytoplasmic part; GO:0044464,cell part	--	--	--	--
Cluster-1527.77727	1.99	3.23	2.93	1.63	1.63	1.05	81	132.51	133.71	71.46	65.38	48.5	-0.929641	0.00651775	0.343986	1413	K17506 protein phosphatase 1L [EC:3.1.3.16] | (RefSeq) probable protein phosphatase 2C 58 (A)	hypothetical protein MNEG_0205 [Monoraphidium neglectum]	P2C19_ARATH RecName: Full=Protein phosphatase 2C and cyclic nucleotide-binding/kinase domain-containing protein; Includes: RecName: Full=Probable protein phosphatase 2C 19; Short=AtPP2C19; EC=3.1.3.16; Includes: RecName: Full=Probable inactive cyclic nucleotide-dependent protein kinase At2g20050;	A0A1Q9CZ02_SYMMI SubName: Full=Uncharacterized protein {ECO:0000313|EMBL:OLP88158.1};	Serine/threonine protein phosphatase	GO:0005886,plasma membrane; GO:0005524,ATP binding; GO:0046872,metal ion binding; GO:0004721,phosphoprotein phosphatase activity; GO:0004674,protein serine/threonine kinase activity; GO:0000166,nucleotide binding; GO:0003674,molecular_function; GO:0005488,binding; GO:0008144,drug binding; GO:0017076,purine nucleotide binding; GO:0030554,adenyl nucleotide binding; GO:0032553,ribonucleotide binding…	Protein phosphatase 2C	--	--	--
Cluster-1527.24951	2.36	1.4	2.69	1.22	0.73	1.37	80.6	48.04	102.97	44.78	24.63	52.94	-0.927122	0.0334397	0.585741	1222	--	--	--	A0A1Q9DPS2_SYMMI SubName: Full=Uncharacterized protein {ECO:0000313|EMBL:OLP97169.1};	--	--	--	--	--	--
Cluster-1527.37354	0	2.44	0	1.35	0	0	0	71.98	0	42.65	0	0	-0.925878	1	1	1082	K00278 L-aspartate oxidase [EC:1.4.3.16] | (RefSeq) L-aspartate oxidase (A)	predicted protein [Micromonas pusilla CCMP1545]	NADB_ORYSJ RecName: Full=L-aspartate oxidase, chloroplastic; EC=1.4.3.16; AltName: Full=Protein FLAGELLIN-INSENSITIVE 4; Flags: Precursor;	Q5ENL4_HETTR SubName: Full=Probable fumerate reductase {ECO:0000313|EMBL:AAW79379.1}; Flags: Fragment;	Fumarate reductase, flavoprotein subunit	GO:0009507,chloroplast; GO:0008734,L-aspartate oxidase activity; GO:0044318,L-aspartate:fumarate oxidoreductase activity; GO:0009435,NAD biosynthetic process; GO:0001716,L-amino-acid oxidase activity; GO:0003674,molecular_function; GO:0003824,catalytic activity; GO:0016491,oxidoreductase activity; GO:0015922,aspartate oxidase activity; GO:0016638,oxidoreductase activity, acting on the CH-NH2 grou…	FAD binding domain	--	--	--
Cluster-1527.15218	1.72	2.14	1.16	0.64	0.29	1.63	73.13	91.67	55.52	29.28	12.19	78.53	-0.925709	0.149105	0.817955	1466	K17579 protein phosphatase 1 regulatory subunit 42 | (RefSeq) hypothetical protein (A)	Protein Mei2 [Klebsormidium nitens]	AML3_ARATH RecName: Full=Protein MEI2-like 3; Short=AML3; AltName: Full=MEI2-like protein 3;	A0A1Q9E9J3_SYMMI SubName: Full=Tellurium resistance protein TerC {ECO:0000313|EMBL:OLQ04078.1};	Protein Mei2, essential for commitment to meiosis, and related proteins	GO:0003723,RNA binding; GO:0051321,meiotic cell cycle; GO:0045927,positive regulation of growth; GO:0045836,positive regulation of meiotic nuclear division; GO:0003674,molecular_function; GO:0003676,nucleic acid binding; GO:0005488,binding; GO:0097159,organic cyclic compound binding; GO:1901363,heterocyclic compound binding; GO:0000003,reproduction; GO:0007049,cell cycle; GO:0008150,biological_pr…	RNA recognition motif 2	--	--	--
Cluster-1527.45637	5.88	5.85	9.42	2.21	3.61	5.02	361.03	361.85	647.78	145.62	218.07	348.61	-0.925037	0.0117876	0.41982	2014	--	hypothetical protein KFL_003440090 [Klebsormidium nitens]	--	A0A1Q9D6E1_SYMMI SubName: Full=Calcium-dependent protein kinase 15 {ECO:0000313|EMBL:OLP90704.1};	--	GO:0005509,calcium ion binding; GO:0016301,kinase activity; GO:0003674,molecular_function; GO:0005488,binding; GO:0046872,metal ion binding; GO:0043167,ion binding; GO:0043169,cation binding; GO:0003824,catalytic activity; GO:0016740,transferase activity; GO:0016772,transferase activity, transferring phosphorus-containing groups	Protein of unknown function (DUF3626)	--	--	--
Cluster-1527.85017	1.49	1.59	2.99	1.86	0.72	0.65	55	59	124	74	26	27	-0.924709	0.0780377	0.723756	1303	--	unknown protein [Bathycoccus prasinos]	--	F0Y6G5_AURAN SubName: Full=Uncharacterized protein {ECO:0000313|EMBL:EGB09208.1};	--	GO:0016787,hydrolase activity; GO:0016042,lipid catabolic process; GO:0003674,molecular_function; GO:0003824,catalytic activity; GO:0008152,metabolic process; GO:0006629,lipid metabolic process; GO:0008150,biological_process; GO:0009056,catabolic process; GO:0044238,primary metabolic process; GO:0071704,organic substance metabolic process; GO:1901575,organic substance catabolic process	RING-variant domain	--	--	--
Cluster-1527.2807	0.34	0.95	0.45	0	0.92	0	16.26	45.87	23.97	0	43.24	0	-0.924352	0.700917	0.982515	1623	--	--	--	--	--	--	--	--	--	--
Cluster-1527.64867	0	0.89	1.27	0.06	1.09	0	0	34.43	55.13	2.48	41.45	0	-0.922397	0.727499	0.983948	1351	--	--	--	A0A1Q9ETV4_SYMMI SubName: Full=Ribosomal RNA small subunit methyltransferase I {ECO:0000313|EMBL:OLQ10839.1};	--	GO:0016021,integral component of membrane; GO:0008168,methyltransferase activity; GO:0003674,molecular_function; GO:0003824,catalytic activity; GO:0016740,transferase activity; GO:0016741,transferase activity, transferring one-carbon groups; GO:0005575,cellular_component; GO:0016020,membrane; GO:0031224,intrinsic component of membrane; GO:0044425,membrane part	--	--	--	--
Cluster-1527.11463	0.66	0.46	1.12	0.42	0.55	0.22	64.21	45.6	122.59	44.27	53.15	24.23	-0.920593	0.0647593	0.692916	3066	--	--	--	--	--	--	--	--	--	--
Cluster-1527.54026	3.07	2.82	1.47	1.43	1.28	1.16	208.49	192.65	111.38	104.4	85.53	89.37	-0.916045	0.008481	0.376596	2202	K03260 translation initiation factor 4G | (RefSeq) hypothetical protein (A)	hypothetical protein SELMODRAFT_437322 [Selaginella moellendorffii]	IF4G2_ORYSJ RecName: Full=Eukaryotic translation initiation factor isoform 4G-2; Short=eIF(iso)-4G-2; Short=eIF(iso)4G-2; AltName: Full=Eukaryotic initiation factor iso-4F subunit p82; Short=eIF-(iso)4F p82 subunit;	A0A1Q9DFT3_SYMMI SubName: Full=Eukaryotic translation initiation factor isoform 4G-2 {ECO:0000313|EMBL:OLP94019.1};	Translation initiation factor 4F, ribosome/mRNA-bridging subunit (eIF-4G)	GO:0003743,translation initiation factor activity; GO:0006417,regulation of translation; GO:0003674,molecular_function; GO:0003676,nucleic acid binding; GO:0003723,RNA binding; GO:0005488,binding; GO:0008135,translation factor activity, RNA binding; GO:0097159,organic cyclic compound binding; GO:1901363,heterocyclic compound binding; GO:0008152,metabolic process; GO:0006412,translation; GO:000651…	MIF4G domain	--	--	--
Cluster-1527.61791	2.89	5.71	3.89	3.57	1.63	1.47	97.41	193.48	147.24	129.46	54.16	55.97	-0.915757	0.0326486	0.581932	1209	--	hypothetical protein AMTR_s00026p00072550 [Amborella trichopoda]	EDR2L_ARATH RecName: Full=Protein ENHANCED DISEASE RESISTANCE 2-like;	A0A1Q9DNX8_SYMMI SubName: Full=Ankyrin-3 {ECO:0000313|EMBL:OLP96883.1};	--	GO:0005789,endoplasmic reticulum membrane; GO:0010008,endosome membrane; GO:0016021,integral component of membrane; GO:0005886,plasma membrane; GO:0008289,lipid binding; GO:0006952,defense response; GO:0003674,molecular_function; GO:0005488,binding; GO:0006950,response to stress; GO:0008150,biological_process; GO:0050896,response to stimulus; GO:0005622,intracellular; GO:0005575,cellular_componen…	Protein of unknown function (DUF1336)	--	--	--
Cluster-1527.44177	54.59	57.98	28.82	33.58	2.62	37.81	2419.62	2588.12	1432.35	1599.97	114.33	1898.31	-0.913984	0.358122	0.92983	1518	--	--	--	--	--	--	Glycosyl hydrolases family 8	--	--	--
Cluster-1527.20419	1.44	5.17	5	5.7	0.31	0.39	14.4	51.87	57.03	61.52	3.09	4.45	-0.913062	0.380855	0.93621	521	--	--	--	--	--	--	WWE domain	--	--	--
Cluster-1527.1594	1.04	1.12	2.55	1.59	0.4	0.54	34	37	94	56	13	20	-0.911103	0.156698	0.826057	1183	--	--	--	--	--	--	Phytanoyl-CoA dioxygenase (PhyH)	--	--	--
Cluster-1527.25706	6.19	6.41	7.44	5.77	2.77	2.19	64.91	67.2	88.53	65.08	28.55	26.11	-0.910848	0.0368244	0.598769	534	--	--	--	A0A1Q9ENT4_SYMMI SubName: Full=Vacuolar protein sorting-associated protein 13C {ECO:0000313|EMBL:OLQ09105.1};	--	--	Glycosyl hydrolase family 61	--	--	--
Cluster-1527.7551	0.92	0.96	0.81	0.54	0.56	0.33	63.8	66.62	62.39	39.81	37.95	26.1	-0.910599	0.0155506	0.467844	2239	--	--	--	--	--	--	ABC transporter transmembrane region	--	--	--
Cluster-1527.13254	3.22	4.62	2.71	2.14	1.75	1.72	116.66	168.49	110.12	83.26	62.41	70.77	-0.903796	0.00496082	0.306942	1283	--	--	--	A0A1Q9CFL0_SYMMI SubName: Full=NADP-dependent malic enzyme {ECO:0000313|EMBL:OLP81637.1};	--	GO:0016021,integral component of membrane; GO:0016272,prefoldin complex; GO:0004471,malate dehydrogenase (decarboxylating) (NAD+) activity; GO:0051287,NAD binding; GO:0008146,sulfotransferase activity; GO:0051082,unfolded protein binding; GO:0006457,protein folding; GO:0003674,molecular_function; GO:0003824,catalytic activity; GO:0004470,malic enzyme activity; GO:0016491,oxidoreductase activity; …	--	--	--	--
Cluster-1527.42277	376.15	168.51	329.41	122.95	174.18	162.48	44289.1	20011.9	43391.6	15560.8	20168.9	21646.9	-0.901929	0.00303067	0.235332	3653	--	hypothetical protein L484_002552 [Morus notabilis]	--	M1DUP9_SOLTU SubName: Full=Uncharacterized protein {ECO:0000313|EnsemblPlants:PGSC0003DMT400094705};	--	--	--	--	--	--
Cluster-1527.23342	1.76	2.4	4.12	2.58	0.03	1.8	132.53	181.92	347.05	208.85	2.52	153.23	-0.900819	0.476374	0.958387	2416	--	--	--	A0A1Q9EP00_SYMMI SubName: Full=Histone H2A.Z-like {ECO:0000313|EMBL:OLQ09108.1};	--	GO:0000786,nucleosome; GO:0005634,nucleus; GO:0003677,DNA binding; GO:0046982,protein heterodimerization activity; GO:0003674,molecular_function; GO:0003676,nucleic acid binding; GO:0005488,binding; GO:0097159,organic cyclic compound binding; GO:1901363,heterocyclic compound binding; GO:0005515,protein binding; GO:0046983,protein dimerization activity; GO:0005622,intracellular; GO:0005575,cellula…	Domain of unknown function (DUF3384)	--	--	--
Cluster-1527.40242	2010.95	780.42	1582.01	588.75	900.75	814.82	39742.6	15494.1	35220.4	12513.2	17501.5	18282.8	-0.898656	0.00761316	0.363233	804	--	hypothetical protein GLYMA_13G021700, partial [Glycine max]	--	A0A0R0GHB5_SOYBN SubName: Full=Uncharacterized protein {ECO:0000313|EMBL:KRH17852.1}; Flags: Fragment;	--	--	--	--	--	--
Cluster-1527.16060	5.91	6.07	8.63	3.39	4.92	2.74	92.65	95.51	152.61	57.13	75.72	48.82	-0.897932	0.0108069	0.407341	685	--	--	--	--	--	--	--	--	--	--
Cluster-1527.48159	5.82	1.52	4.82	2.32	2.27	1.98	42.22	11	40.01	18.09	16.19	16.4	-0.897397	0.161035	0.829849	440	--	hypothetical protein BVRB_041110, partial [Beta vulgaris subsp. vulgaris]	--	A0A0J7YMY6_BETVU SubName: Full=Uncharacterized protein {ECO:0000313|EMBL:KMS64936.1}; Flags: Fragment;	--	--	--	--	--	--
Cluster-1527.72981	7.92	4.24	9.2	2.54	4.58	4.18	58	31	77	20	33	35	-0.897166	0.0724136	0.709086	442	--	--	--	--	--	--	--	--	--	--
Cluster-1527.15704	4.04	2.83	2.52	3.52	0.58	1.03	370.44	261.85	258.49	347.36	52.5	107.07	-0.89643	0.102542	0.762445	2896	K01190 beta-galactosidase [EC:3.2.1.23] | (RefSeq) beta-galactosidase (A)	beta-galactosidase [Dorcoceras hygrometricum]	--	A0A1E7FPZ7_9STRA SubName: Full=Uncharacterized protein {ECO:0000313|EMBL:OEU20231.1};	Beta-Glucuronidase GUSB (glycosylhydrolase superfamily 2)	GO:0004553,hydrolase activity, hydrolyzing O-glycosyl compounds; GO:0005975,carbohydrate metabolic process; GO:0003674,molecular_function; GO:0003824,catalytic activity; GO:0016787,hydrolase activity; GO:0016798,hydrolase activity, acting on glycosyl bonds; GO:0008152,metabolic process; GO:0008150,biological_process; GO:0044238,primary metabolic process; GO:0071704,organic substance metabolic pro…	Glycosyl hydrolases family 2, TIM barrel domain	--	--	--
Cluster-1527.12478	44.91	45.76	37.75	17.82	22.11	27.73	725.38	741.66	688.15	309.64	351.13	508.95	-0.895974	0.000312528	0.0597916	699	K02639 ferredoxin | (RefSeq) ferredoxin, leaf L-A-like (A)	PREDICTED: ferredoxin, leaf L-A-like [Pyrus x bretschneideri]	FER_PERBI RecName: Full=Ferredoxin;	A7YXI8_ALEFU RecName: Full=Ferredoxin {ECO:0000256|RuleBase:RU364001};	--	GO:0009507,chloroplast; GO:0051537,2 iron, 2 sulfur cluster binding; GO:0009055,electron transfer activity; GO:0046872,metal ion binding; GO:0003674,molecular_function; GO:0005488,binding; GO:0048037,cofactor binding; GO:0051536,iron-sulfur cluster binding; GO:0051540,metal cluster binding; GO:0003824,catalytic activity; GO:0016491,oxidoreductase activity; GO:0043167,ion binding; GO:0043169,catio…	2Fe-2S iron-sulfur cluster binding domain	--	--	--
Cluster-1527.3367	1.65	1.03	1.44	1.12	0.42	0.67	48	30	47	35	12	22	-0.893133	0.0869926	0.740279	1074	--	--	--	--	--	--	Pentatricopeptide repeat domain	--	--	--
Cluster-1527.10182	1.72	2.08	2.24	2.08	1.16	0.09	84.22	102.81	123.36	109.65	55.87	5.09	-0.892565	0.235757	0.884642	1655	--	--	--	--	--	--	Myb-like DNA-binding domain	--	--	--
Cluster-1527.28148	0.86	0.91	0.82	0.61	0.48	0.32	77.45	82.42	82.02	58.3	42.22	32.07	-0.89231	0.0111328	0.410327	2833	--	hypothetical protein KFL_000180250 [Klebsormidium nitens]	--	A0A1Q9DG99_SYMMI RecName: Full=Poly [ADP-ribose] polymerase {ECO:0000256|RuleBase:RU362114}; Short=PARP {ECO:0000256|RuleBase:RU362114}; EC=2.4.2.30 {ECO:0000256|RuleBase:RU362114};	Ankyrin	GO:0016021,integral component of membrane; GO:0003950,NAD+ ADP-ribosyltransferase activity; GO:0003674,molecular_function; GO:0003824,catalytic activity; GO:0016740,transferase activity; GO:0016757,transferase activity, transferring glycosyl groups; GO:0016763,transferase activity, transferring pentosyl groups; GO:0005575,cellular_component; GO:0016020,membrane; GO:0031224,intrinsic component of …	Poly(ADP-ribose) polymerase catalytic domain	--	--	--
Cluster-1527.74236	0.32	0.74	0.53	0.44	0.15	0.26	31.26	73.21	58	45.85	14.69	29.07	-0.891215	0.101189	0.758992	3075	K13242 nitric-oxide synthase, endothelial [EC:1.14.13.39] | (RefSeq) Flavoprotein pyridine nucleotide cytochrome reductase (A)	predicted protein [Bathycoccus prasinos]	NDOR1_ARATH RecName: Full=NADPH-dependent diflavin oxidoreductase 1 {ECO:0000255|HAMAP-Rule:MF_03178}; EC=1.18.1.- {ECO:0000255|HAMAP-Rule:MF_03178}; AltName: Full=NADPH-dependent FMN and FAD-containing oxidoreductase {ECO:0000255|HAMAP-Rule:MF_03178};	A0A1W0A0D7_9STRA SubName: Full=Uncharacterized protein {ECO:0000313|EMBL:OQS03651.1};	NADP/FAD dependent oxidoreductase	GO:0005737,cytoplasm; GO:0005634,nucleus; GO:0010181,FMN binding; GO:0003958,NADPH-hemoprotein reductase activity; GO:0016651,oxidoreductase activity, acting on NAD(P)H; GO:0009793,embryo development ending in seed dormancy; GO:0000166,nucleotide binding; GO:0003674,molecular_function; GO:0005488,binding; GO:0032553,ribonucleotide binding; GO:0036094,small molecule binding; GO:0043167,ion binding…	Nitric oxide synthase, oxygenase domain	--	--	--
Cluster-1527.71400	0.42	0.75	0.29	4.25	1.69	5.77	5	9	4	55	20	79	3.04671	2.13954e-05	0.0108205	579	K03231 elongation factor 1-alpha | (RefSeq) Translation elongation factor eEF1, subunit alpha (A)	EF-1 alpha-like protein, partial [Mesostigma viride]	EF1AC_PORPU RecName: Full=Elongation factor 1-alpha C; Short=EF-1-alpha C;	A7YXX0_KARVE SubName: Full=Translation elongation factor-like protein {ECO:0000313|EMBL:ABV22249.1};	Translation elongation factor EF-1 alpha/Tu	GO:0005737,cytoplasm; GO:0005525,GTP binding; GO:0003924,GTPase activity; GO:0003746,translation elongation factor activity; GO:0000166,nucleotide binding; GO:0001882,nucleoside binding; GO:0001883,purine nucleoside binding; GO:0003674,molecular_function; GO:0005488,binding; GO:0017076,purine nucleotide binding; GO:0019001,guanyl nucleotide binding; GO:0032549,ribonucleoside binding; GO:0032550,p…	Elongation factor Tu GTP binding domain	--	--	--
Cluster-1527.38518	720.57	266.68	570.85	213.52	334.25	278.71	66875.4	24958	59294.8	21301.4	30507.6	29274.3	-0.889912	0.00974298	0.395522	2928	--	hypothetical protein GLYMA_13G021700, partial [Glycine max]	--	A0A0R0GHB5_SOYBN SubName: Full=Uncharacterized protein {ECO:0000313|EMBL:KRH17852.1}; Flags: Fragment;	FOG: Zn-finger	--	--	--	--	--
Cluster-1527.49851	20	17.49	14.48	5.13	9.34	12.85	566.54	498.35	460.98	156.14	260.18	412.62	-0.889128	0.0143574	0.453139	1053	--	predicted protein [Chlamydomonas reinhardtii]	--	A0A1Q9EXF7_SYMMI SubName: Full=ATP-dependent zinc metalloprotease FtsH {ECO:0000313|EMBL:OLQ12128.1};	--	GO:0016021,integral component of membrane; GO:0005524,ATP binding; GO:0005525,GTP binding; GO:0004222,metalloendopeptidase activity; GO:0000166,nucleotide binding; GO:0003674,molecular_function; GO:0005488,binding; GO:0008144,drug binding; GO:0017076,purine nucleotide binding; GO:0030554,adenyl nucleotide binding; GO:0032553,ribonucleotide binding; GO:0032555,purine ribonucleotide binding; GO:003…	Interferon-inducible GTPase (IIGP)	--	--	--
Cluster-1527.47293	165.27	60.29	97.2	31.01	81.39	58.36	4312	1582	2851	870	2088	1727	-0.888697	0.0337866	0.587487	988	--	--	--	--	--	--	--	--	--	--
Cluster-1527.31701	0.55	1.16	1.46	0	0.76	0.89	18.55	39.28	55.39	0	25.33	34.03	-0.887497	0.398206	0.940194	1209	--	--	--	A0A1Q9CEA9_SYMMI SubName: Full=Protein dispatched-like 1 {ECO:0000313|EMBL:OLP81283.1};	--	GO:0016021,integral component of membrane; GO:0007224,smoothened signaling pathway; GO:0007165,signal transduction; GO:0007154,cell communication; GO:0007166,cell surface receptor signaling pathway; GO:0008150,biological_process; GO:0009987,cellular process; GO:0023052,signaling; GO:0050789,regulation of biological process; GO:0050794,regulation of cellular process; GO:0050896,response to stimulu…	--	--	--	--
Cluster-1527.26161	23.67	16.55	27.69	12.85	16.33	7.47	1166.2	821.76	1529.19	680.87	791.3	416.58	-0.886806	0.00335903	0.247154	1662	--	--	--	A0A1Q9CB56_SYMMI SubName: Full=Putative D,D-dipeptide-binding periplasmic protein DdpA {ECO:0000313|EMBL:OLP80156.1};	--	GO:0005576,extracellular region; GO:0030248,cellulose binding; GO:0005975,carbohydrate metabolic process; GO:0001871,pattern binding; GO:0003674,molecular_function; GO:0030246,carbohydrate binding; GO:0005488,binding; GO:0030247,polysaccharide binding; GO:0008152,metabolic process; GO:0008150,biological_process; GO:0044238,primary metabolic process; GO:0071704,organic substance metabolic process;…	Bacterial extracellular solute-binding proteins, family 5 Middle	--	--	--
Cluster-1527.10145	9.27	6.51	8.09	5.12	2.8	4.84	101	71	100	60	30	60	-0.885545	0.0177801	0.488772	546	K08960 casein kinase 1, epsilon [EC:2.7.11.1] | (RefSeq) casein kinase 1-like protein 4 isoform X1 (A)	casein kinase i isoform delta-like protein, partial [Trifolium pratense]	CKL10_ARATH RecName: Full=Casein kinase 1-like protein 10 {ECO:0000305}; EC=2.7.11.1 {ECO:0000305}; AltName: Full=Protein CASEIN KINASE I-LIKE 10 {ECO:0000303|PubMed:16126836};	K3XJF5_SETIT SubName: Full=Uncharacterized protein {ECO:0000313|EMBL:KQL03252.1, ECO:0000313|EnsemblPlants:Si002028m};	Casein kinase (serine/threonine/tyrosine protein kinase)	GO:0005737,cytoplasm; GO:0005634,nucleus; GO:0009506,plasmodesma; GO:0005524,ATP binding; GO:0004674,protein serine/threonine kinase activity; GO:0006897,endocytosis; GO:0018105,peptidyl-serine phosphorylation; GO:0008360,regulation of cell shape; GO:0000166,nucleotide binding; GO:0003674,molecular_function; GO:0005488,binding; GO:0008144,drug binding; GO:0017076,purine nucleotide binding; GO:003…	--	--	--	--
Cluster-1527.14236	2.63	0	0.68	0.73	1.09	0	84.96	0	24.57	25.37	34.55	0	-0.884978	0.723781	0.983948	1167	--	--	--	A0A1Q9D7B0_SYMMI SubName: Full=Uncharacterized protein {ECO:0000313|EMBL:OLP91102.1};	--	GO:0016021,integral component of membrane; GO:0005575,cellular_component; GO:0016020,membrane; GO:0031224,intrinsic component of membrane; GO:0044425,membrane part	--	--	--	--
Cluster-1527.49588	2	1.98	6.99	1.76	0.8	3.2	61.15	60.96	240.11	57.81	24	110.91	-0.883912	0.17384	0.841282	1119	--	--	--	--	--	--	Zinc finger C-x8-C-x5-C-x3-H type (and similar)	C3H	TF	C3H
Cluster-1527.40537	4.2	5.53	4.55	2.71	3.37	1.67	62.05	82	76	43	49	28	-0.883908	0.0227345	0.530859	659	--	--	--	--	--	--	--	--	--	--
Cluster-1527.45359	1.51	1.83	1.87	0	2.81	0	208.8	254.06	287.91	0	380.93	0	-0.882191	1	1	4238	--	--	--	A0A1Q9C2I4_SYMMI SubName: Full=Uncharacterized protein {ECO:0000313|EMBL:OLP77121.1};	--	GO:0016021,integral component of membrane; GO:0005509,calcium ion binding; GO:0003674,molecular_function; GO:0005488,binding; GO:0046872,metal ion binding; GO:0043167,ion binding; GO:0043169,cation binding; GO:0005575,cellular_component; GO:0016020,membrane; GO:0031224,intrinsic component of membrane; GO:0044425,membrane part	Family of unknown function (DUF5334)	--	--	--
Cluster-1527.83939	3.13	1.53	2.85	0.91	1.5	1.65	38.75	19	39.94	12.11	18.24	23.25	-0.881277	0.122063	0.787046	589	--	--	--	--	--	--	--	--	--	--
Cluster-1527.46760	3.5	0.88	1.68	0.45	1.6	1.16	115.27	29.2	62.37	16.06	51.82	43.42	-0.880502	0.175274	0.84282	1188	K02706 photosystem II P680 reaction center D2 protein [EC:1.10.3.9] | (RefSeq) psbD; photosystem II protein D2 (A)	photosystem II protein D2 [Chlorella vulgaris]	PSBD_CHLVU RecName: Full=Photosystem II D2 protein {ECO:0000255|HAMAP-Rule:MF_01383}; Short=PSII D2 protein {ECO:0000255|HAMAP-Rule:MF_01383}; EC=1.10.3.9 {ECO:0000255|HAMAP-Rule:MF_01383}; AltName: Full=Photosystem Q(A) protein {ECO:0000255|HAMAP-Rule:MF_01383};	Q2I6P6_LINPO RecName: Full=Photosystem II D2 protein {ECO:0000256|HAMAP-Rule:MF_01383}; Short=PSII D2 protein {ECO:0000256|HAMAP-Rule:MF_01383}; EC=1.10.3.9 {ECO:0000256|HAMAP-Rule:MF_01383}; AltName: Full=Photosystem Q(A) protein {ECO:0000256|HAMAP-Rule:MF_01383};	--	GO:0009535,chloroplast thylakoid membrane; GO:0016021,integral component of membrane; GO:0009523,photosystem II; GO:0016168,chlorophyll binding; GO:0045156,electron transporter, transferring electrons within the cyclic electron transport pathway of photosynthesis activity; GO:0046872,metal ion binding; GO:0009772,photosynthetic electron transport in photosystem II; GO:0018298,protein-chromophore …	Photosynthetic reaction centre protein	--	--	--
Cluster-1527.61715	14.68	12.66	13.29	7.81	8.97	5.39	40	34	43	23	24	17	-0.879467	0.0497033	0.644105	305	--	--	--	--	--	--	--	--	--	--
Cluster-1527.55603	4.32	4.46	5.57	3.3	3.1	1.45	34	35	50	28	24	13	-0.879185	0.0739533	0.714052	458	--	--	--	--	--	--	--	--	--	--
Cluster-1527.23125	34.73	30.95	29.43	10.15	13.48	26.61	551.33	493.01	527.41	173.34	210.36	480.11	-0.875988	0.0211356	0.518793	691	K02639 ferredoxin | (RefSeq) predicted protein (A)	predicted protein [Ostreococcus lucimarinus CCE9901]	FER_PERBI RecName: Full=Ferredoxin;	A7YXI8_ALEFU RecName: Full=Ferredoxin {ECO:0000256|RuleBase:RU364001};	--	GO:0009507,chloroplast; GO:0051537,2 iron, 2 sulfur cluster binding; GO:0009055,electron transfer activity; GO:0046872,metal ion binding; GO:0003674,molecular_function; GO:0005488,binding; GO:0048037,cofactor binding; GO:0051536,iron-sulfur cluster binding; GO:0051540,metal cluster binding; GO:0003824,catalytic activity; GO:0016491,oxidoreductase activity; GO:0043167,ion binding; GO:0043169,catio…	2Fe-2S iron-sulfur cluster binding domain	--	--	--
Cluster-1527.78788	1.24	1.52	1.16	0.76	0.64	0.72	94.64	116.85	98.41	62.47	47.87	62.37	-0.874753	0.00383997	0.264973	2441	--	--	--	A0A1Q9CRJ0_SYMMI SubName: Full=Uncharacterized protein {ECO:0000313|EMBL:OLP85531.1};	--	GO:0016021,integral component of membrane; GO:0005575,cellular_component; GO:0016020,membrane; GO:0031224,intrinsic component of membrane; GO:0044425,membrane part	--	--	--	--
Cluster-1527.77532	2.35	1.51	0.37	8.74	5.45	18.45	11	7	2	44	25	99	3.01501	0.000103215	0.0292827	364	--	predicted protein [Micromonas commoda]	--	A0A061S172_9CHLO SubName: Full=Uncharacterized protein {ECO:0000313|EMBL:JAC77993.1};	--	--	C2 domain	--	--	--
Cluster-1527.59283	88.79	63.41	45.74	45.06	34.97	28.02	62	43	40	34	24	23	-0.873262	0.0494517	0.643066	229	--	--	--	--	--	--	--	--	--	--
Cluster-1527.40044	0.1	1.34	1.67	0.53	0.9	0.26	4.92	64.97	90.5	27.6	42.8	14.11	-0.871545	0.309914	0.915789	1632	--	--	--	A0A1Q9DSH4_SYMMI SubName: Full=Transposon Ty4-J Gag-Pol polyprotein {ECO:0000313|EMBL:OLP98122.1};	--	--	Protein of unknown function (DUF3022)	--	--	--
Cluster-1527.40267	611.47	230.92	322.87	136.09	297.65	193.2	13851	5258	8230	3315	6629	4966	-0.870892	0.0248418	0.542694	888	--	--	--	--	--	--	--	--	--	--
Cluster-1527.3529	1.51	1.18	3.09	1.06	1.02	1.05	57	45	131	43	38	45	-0.868211	0.0594894	0.678831	1328	--	hypothetical protein CHLNCDRAFT_134048 [Bathycoccus prasinos]	--	K8ERF3_9CHLO SubName: Full=Uncharacterized protein {ECO:0000313|EMBL:CCO14970.1};	--	--	Glycosyl transferase family 2	--	--	--
Cluster-1527.7053	1.5	1.2	2.31	1.12	0.89	0.73	67	54	116	54	39	37	-0.866437	0.0291051	0.564827	1529	--	--	--	L1JY75_GUITH SubName: Full=Uncharacterized protein {ECO:0000313|EMBL:EKX53531.1, ECO:0000313|EnsemblProtists:EKX53531};	--	GO:0016021,integral component of membrane; GO:0005575,cellular_component; GO:0016020,membrane; GO:0031224,intrinsic component of membrane; GO:0044425,membrane part	--	--	--	--
Cluster-1527.6296	24.11	17.37	24.7	8.72	20.32	7.11	280	202	325	109	232	94	-0.865865	0.0342064	0.588181	567	--	--	--	--	--	--	--	--	--	--
Cluster-1527.28981	2.25	2.23	0.85	0	2.93	0	86.11	85.79	36.61	0	110.38	0	-0.865466	1	1	1342	--	--	--	A0A1Q9D5Q6_SYMMI SubName: Full=Ankyrin repeat domain-containing protein 11 {ECO:0000313|EMBL:OLP90525.1};	--	GO:0016021,integral component of membrane; GO:0005575,cellular_component; GO:0016020,membrane; GO:0031224,intrinsic component of membrane; GO:0044425,membrane part	Ion transport protein	--	--	--
Cluster-1527.81282	5.75	5.15	7.36	4.72	2.71	2.6	162	146	233	143	75	83	-0.865318	0.00580401	0.327521	1049	--	--	--	--	--	--	--	--	--	--
Cluster-1527.16346	1.77	1.69	2.36	1.28	0.76	1.13	115.01	110.5	171.47	89.11	48.49	82.91	-0.863997	0.0075297	0.361752	2119	--	--	--	A0A1Q9F1H3_SYMMI SubName: Full=Uncharacterized protein {ECO:0000313|EMBL:OLQ13515.1};	--	--	SAP domain	--	--	--
Cluster-1527.44256	7.17	10.4	10.49	3.06	8.62	3.6	240.22	350.98	394.82	110.42	284.06	136.88	-0.863945	0.0364081	0.5985	1204	--	--	--	--	--	--	MORN repeat	--	--	--
Cluster-1527.56596	30.87	34.01	35.36	20.98	25.6	8.96	190.31	208.65	250.3	139.28	155.01	63.21	-0.863618	0.0184547	0.495075	408	--	--	--	--	--	--	--	--	--	--
Cluster-1527.20069	3.06	2.72	4.83	2.73	1.96	1.17	76	68	135	73	48	33	-0.861901	0.0395953	0.610725	952	--	--	--	--	--	--	--	--	--	--
Cluster-1527.33084	2.41	3.84	6.78	2.91	0.82	3.32	152.78	244.87	481.26	198.45	51.37	237.78	-0.86189	0.104977	0.767118	2071	K12823 ATP-dependent RNA helicase DDX5/DBP2 [EC:3.6.4.13] | (RefSeq) DEAD-box ATP-dependent RNA helicase 20 isoform X3 (A)	DEAD-box ATP-dependent RNA helicase 39 [Cucurbita maxima]	RH39_ORYSJ RecName: Full=DEAD-box ATP-dependent RNA helicase 39; EC=3.6.4.13;	A0A1Q9DQL4_SYMMI SubName: Full=DEAD-box ATP-dependent RNA helicase 39 {ECO:0000313|EMBL:OLP97434.1};	ATP-dependent RNA helicase	GO:0009507,chloroplast; GO:0005737,cytoplasm; GO:0005730,nucleolus; GO:0005524,ATP binding; GO:0004004,ATP-dependent RNA helicase activity; GO:0070180,large ribosomal subunit rRNA binding; GO:0080158,NA; GO:1901259,chloroplast rRNA processing; GO:0010501,RNA secondary structure unwinding; GO:0000166,nucleotide binding; GO:0003674,molecular_function; GO:0005488,binding; GO:0008144,drug binding; GO…	DEAD/DEAH box helicase	--	--	--
Cluster-1527.62641	2.64	1.88	2.02	0.48	2.23	0.86	88.09	62.93	75.41	17.32	72.98	32.43	-0.861253	0.136937	0.805784	1198	--	--	--	--	--	--	Ankyrin repeats (3 copies)	--	--	--
Cluster-1527.78339	6.11	8.12	8.1	3.94	5.87	2.47	362	485	538	251	342	166	-0.861176	0.006773	0.3485	1953	--	centriole proteome protein, partial [Chlamydomonas reinhardtii]	--	F0YPV1_AURAN SubName: Full=Uncharacterized protein {ECO:0000313|EMBL:EGB02858.1}; Flags: Fragment;	--	GO:0004620,phospholipase activity; GO:0009395,phospholipid catabolic process; GO:0003674,molecular_function; GO:0003824,catalytic activity; GO:0016298,lipase activity; GO:0016787,hydrolase activity; GO:0016788,hydrolase activity, acting on ester bonds; GO:0008152,metabolic process; GO:0006629,lipid metabolic process; GO:0006644,phospholipid metabolic process; GO:0006793,phosphorus metabolic proce…	Patatin-like phospholipase	--	--	--
Cluster-1527.6628	1.68	1.5	2.76	1.78	0.44	1.06	68.86	61.93	126.63	78.16	17.77	49.25	-0.859105	0.102247	0.76181	1418	--	--	--	--	--	--	--	--	--	--
Cluster-1527.81559	0.97	0.66	0.73	0.44	0.73	0.14	111.79	75.91	93.8	53.87	82.54	17.89	-0.858991	0.116646	0.78028	3569	--	--	--	A0A1Q9F4X1_SYMMI SubName: Full=Attractin-like protein 1 {ECO:0000313|EMBL:OLQ14692.1};	--	GO:0016021,integral component of membrane; GO:0005575,cellular_component; GO:0016020,membrane; GO:0031224,intrinsic component of membrane; GO:0044425,membrane part	GPCR proteolysis site, GPS, motif	--	--	--
Cluster-1527.32085	8.81	17	15	5.53	10.89	5.96	220.71	428.47	422.69	149.13	268.3	169.32	-0.856473	0.0188132	0.497668	958	--	hypothetical protein KFL_003440090 [Klebsormidium nitens]	--	A0A1Q9F0A8_SYMMI SubName: Full=Uncharacterized protein {ECO:0000313|EMBL:OLQ13063.1};	--	GO:0005509,calcium ion binding; GO:0003674,molecular_function; GO:0005488,binding; GO:0046872,metal ion binding; GO:0043167,ion binding; GO:0043169,cation binding	Protein of unknown function (DUF3626)	--	--	--
Cluster-1527.1238	2.68	2.17	1.79	8.41	7.66	34.85	21	17	16	71	59	312	3.00808	4.97292e-06	0.00413179	457	K02889 large subunit ribosomal protein L21e | (RefSeq) 60S ribosomal protein L21-1 (A)	60S ribosomal protein L21 [Handroanthus impetiginosus]	RL212_ARATH RecName: Full=60S ribosomal protein L21-2;	A0A1J3D826_NOCCA SubName: Full=60S ribosomal protein L21-1 {ECO:0000313|EMBL:JAU12812.1}; Flags: Fragment;	60S ribosomal protein L21	GO:0022625,cytosolic large ribosomal subunit; GO:0003735,structural constituent of ribosome; GO:0006412,translation; GO:0003674,molecular_function; GO:0005198,structural molecule activity; GO:0008152,metabolic process; GO:0006518,peptide metabolic process; GO:0006807,nitrogen compound metabolic process; GO:0008150,biological_process; GO:0009058,biosynthetic process; GO:0009059,macromolecule biosy…	Ribosomal protein L21e	--	--	--
Cluster-1527.50483	7.72	10.29	10.58	7.94	6.87	1.24	617.28	829.52	947.46	682.96	540.65	112.43	-0.855223	0.0894519	0.742544	2555	K01081 5'-nucleotidase [EC:3.1.3.5] | (RefSeq) hypothetical protein (A)	hypothetical protein CHLRE_03g180600v5 [Chlamydomonas reinhardtii]	--	A0A1Q9D0E8_SYMMI SubName: Full=Putative dolichyl pyrophosphate Glc1Man9GlcNAc2 alpha-1,3-glucosyltransferase {ECO:0000313|EMBL:OLP88643.1};	5' nucleotidase	GO:0005789,endoplasmic reticulum membrane; GO:0016021,integral component of membrane; GO:0016787,hydrolase activity; GO:0016758,transferase activity, transferring hexosyl groups; GO:0009166,nucleotide catabolic process; GO:0003674,molecular_function; GO:0003824,catalytic activity; GO:0016740,transferase activity; GO:0016757,transferase activity, transferring glycosyl groups; GO:0008152,metabolic …	5'-nucleotidase, C-terminal domain	--	--	--
Cluster-1527.66915	1.85	1.82	2.33	1.47	1.13	0.72	78.2	77.56	110.59	66.89	47.09	34.56	-0.85486	0.0169097	0.483277	1460	--	--	--	--	--	--	Sulfotransferase family	--	--	--
Cluster-1527.57471	69.19	83.38	81.65	47.57	55.15	28.21	113.88	134.37	163.42	84.75	89.12	54.12	-0.853621	0.00698092	0.351667	269	--	--	--	--	--	--	--	--	--	--
Cluster-1527.28210	3.46	6.87	3.93	3.49	2.67	1.79	150.82	302.12	192.16	163.91	114.37	88.28	-0.852264	0.0199323	0.50876	1498	--	--	--	A0A1E7EPK4_9STRA SubName: Full=Uncharacterized protein {ECO:0000313|EMBL:OEU07784.1};	--	GO:0016021,integral component of membrane; GO:0005575,cellular_component; GO:0016020,membrane; GO:0031224,intrinsic component of membrane; GO:0044425,membrane part	--	--	--	--
Cluster-1527.25445	1.18	0.99	1.89	0.73	0.3	1.17	67.05	56.62	119.93	44.28	16.6	75.22	-0.851767	0.120457	0.784059	1875	--	hypothetical protein PHYPA_003929 [Physcomitrella patens]	--	A0A1Q9F697_SYMMI SubName: Full=Uncharacterized protein {ECO:0000313|EMBL:OLQ15152.1};	Predicted amino acid transporter	GO:0016021,integral component of membrane; GO:0005575,cellular_component; GO:0016020,membrane; GO:0031224,intrinsic component of membrane; GO:0044425,membrane part	Transmembrane amino acid transporter protein	--	--	--
Cluster-1527.80819	5.1	5.25	4.15	3.63	3.09	1.41	52.05	53.62	48.06	39.84	30.96	16.39	-0.850574	0.0678982	0.699524	526	--	--	--	--	--	--	--	--	--	--
Cluster-1527.65817	2.31	2.75	2.98	2.35	1.28	0.88	45.73	54.79	66.58	50.03	24.9	19.81	-0.849477	0.0647051	0.69289	806	--	--	--	A0A1Q9CLA0_SYMMI RecName: Full=Chloride channel protein {ECO:0000256|RuleBase:RU361221};	--	GO:0016021,integral component of membrane; GO:0016301,kinase activity; GO:0046872,metal ion binding; GO:0003950,NAD+ ADP-ribosyltransferase activity; GO:0005247,voltage-gated chloride channel activity; GO:0003674,molecular_function; GO:0003824,catalytic activity; GO:0016740,transferase activity; GO:0016772,transferase activity, transferring phosphorus-containing groups; GO:0005488,binding; GO:004…	--	--	--	--
Cluster-1527.47653	81.48	30.13	86.33	22.86	50.79	34.2	2821	1050	3355	851	1729	1342	-0.849175	0.0387341	0.607522	1236	--	BnaCnng12640D [Brassica napus]	--	A0A078I3U3_BRANA SubName: Full=BnaCnng12640D protein {ECO:0000313|EMBL:CDY45505.1};	--	--	--	--	--	--
Cluster-1527.72091	0	1.29	1.02	1.35	0	0	0	39.01	34.62	43.63	0	0	-0.847906	0.813743	0.990897	1105	K01601 ribulose-bisphosphate carboxylase large chain [EC:4.1.1.39] | (RefSeq) uncharacterized protein LOC112271745 (A)	hypothetical protein BVRB_037930, partial [Beta vulgaris subsp. vulgaris]	--	A0A0V0GKN2_SOLCH SubName: Full=Putative ovule protein {ECO:0000313|EMBL:JAP08552.1}; Flags: Fragment;	--	--	--	--	--	--
Cluster-1527.40404	1.06	1.69	0.42	0.34	0.61	0.78	116.83	188.07	51.26	39.84	66.02	97.11	-0.846896	0.130757	0.796268	3436	--	--	--	A0A1Q9CF68_SYMMI SubName: Full=Uncharacterized protein {ECO:0000313|EMBL:OLP81551.1};	Ankyrin repeat protein	GO:0016021,integral component of membrane; GO:0005216,ion channel activity; GO:0003674,molecular_function; GO:0005215,transporter activity; GO:0022857,transmembrane transporter activity; GO:0015075,ion transmembrane transporter activity; GO:0015267,channel activity; GO:0015318,inorganic molecular entity transmembrane transporter activity; GO:0022803,passive transmembrane transporter activity; GO:…	Ankyrin repeat	--	--	--
Cluster-1527.19829	33.68	13.48	31	16.69	7.87	18.59	60.17	23.59	67.08	32.26	13.8	38.67	-0.845048	0.136606	0.804596	274	--	hypothetical protein CRG98_047964 [Punica granatum]	--	A0A0V0H990_SOLCH SubName: Full=Putative ovule protein {ECO:0000313|EMBL:JAP16926.1}; Flags: Fragment;	--	--	--	--	--	--
Cluster-1527.3887	0.86	1.01	1.84	1	0.69	0.38	52	61	124	65	41	26	-0.844314	0.0797577	0.727392	1979	K20870 putative beta-1,4-xylosyltransferase IRX10 [EC:2.4.2.-] | (RefSeq) probable glucuronosyltransferase Os01g0926700 (A)	probable glucuronosyltransferase Os03g0107900 [Aegilops tauschii subsp. tauschii]	IRX10_ARATH RecName: Full=Probable beta-1,4-xylosyltransferase IRX10; EC=2.4.2.-; AltName: Full=Glucuronoxylan glucuronosyltransferase 1; Short=AtGUT1; AltName: Full=Glucuronoxylan glucuronosyltransferase 2; AltName: Full=Protein IRREGULAR XYLEM 10; AltName: Full=Xylan xylosyltransferase IRX10;	A0A1Q9EC44_SYMMI SubName: Full=Putative glucuronoxylan glucuronosyltransferase IRX7 {ECO:0000313|EMBL:OLQ04957.1};	Acetylglucosaminyltransferase EXT1/exostosin 1	GO:0000139,Golgi membrane; GO:0016021,integral component of membrane; GO:0080116,glucuronoxylan glucuronosyltransferase activity; GO:0042285,xylosyltransferase activity; GO:0071555,cell wall organization; GO:0010417,glucuronoxylan biosynthetic process; GO:0009834,plant-type secondary cell wall biogenesis; GO:0006486,protein glycosylation; GO:0003674,molecular_function; GO:0003824,catalytic activi…	Exostosin family	--	--	--
Cluster-1527.69521	51.51	34.86	69.29	29.97	28.45	30.04	35	23	59	22	19	24	-0.840745	0.0997212	0.757541	228	--	--	--	--	--	--	--	--	--	--
Cluster-1527.68590	0.77	1.06	1.18	1.34	0	0.38	99.55	138.77	172.19	187.1	0	55.69	-0.840138	0.621638	0.977205	4013	--	--	--	--	--	--	Ornatin	--	--	--
Cluster-1527.19353	4.35	4.82	7.64	1.91	3.77	3.51	230.25	257.22	453.91	108.66	196.67	210.71	-0.837404	0.0210473	0.518306	1770	--	--	--	--	--	--	--	--	--	--
Cluster-1527.82324	3.85	4.01	2.56	1.94	1.9	1.9	95.7	100.29	71.6	51.96	46.55	53.74	-0.836806	0.0135248	0.443832	953	--	--	--	--	--	--	--	--	--	--
Cluster-1527.34456	27.28	25.06	18.2	13.16	14.21	11.82	449	414	338	233	230	221	-0.836209	0.000267881	0.0540004	708	K20217 ubiquitin-conjugating enzyme E2 E [EC:2.3.2.23] | (RefSeq) probable ubiquitin-conjugating enzyme E2 (A)	ubiquitin-conjugating enzyme [Coccomyxa subellipsoidea C-169]	UBC11_ARATH RecName: Full=Ubiquitin-conjugating enzyme E2 11; EC=2.3.2.23; AltName: Full=E2 ubiquitin-conjugating enzyme 11; AltName: Full=Ubiquitin carrier protein 11; AltName: Full=Ubiquitin-conjugating enzyme E2-17 kDa 11; AltName: Full=Ubiquitin-protein ligase 11;	B5A4L9_GYMST SubName: Full=Ubiquitin-conjugating enzyme 2 {ECO:0000313|EMBL:ACF24571.1};	Ubiquitin-protein ligase	GO:0005524,ATP binding; GO:0004842,ubiquitin-protein transferase activity; GO:0006511,ubiquitin-dependent protein catabolic process; GO:0000166,nucleotide binding; GO:0003674,molecular_function; GO:0005488,binding; GO:0008144,drug binding; GO:0017076,purine nucleotide binding; GO:0030554,adenyl nucleotide binding; GO:0032553,ribonucleotide binding; GO:0032555,purine ribonucleotide binding; GO:003…	Ubiquitin-conjugating enzyme	--	--	--
Cluster-1527.43104	1.28	3.79	0.71	0	1.08	2.02	76.04	227.3	47.43	0.11	63.17	136	-0.836102	0.64177	0.979686	1960	--	hypothetical protein PHYPA_018990 [Physcomitrella patens]	--	D8RAT1_SELML SubName: Full=Uncharacterized protein {ECO:0000313|EMBL:EFJ30367.1};	Inhibitor of type V adenylyl cyclases/Neuronal presynaptic protein Highwire/PAM/RPM-1	--	RING-type zinc-finger	--	--	--
Cluster-1527.15266	1.91	2.04	1.74	1.13	1.37	0.69	151.52	163.18	154.29	96.09	107.24	62.04	-0.835668	0.00705944	0.35315	2538	--	--	--	R1CIX8_EMIHU SubName: Full=Uncharacterized protein {ECO:0000313|EMBL:EOD22818.1, ECO:0000313|EnsemblProtists:EOD22818};	--	GO:0016021,integral component of membrane; GO:0005575,cellular_component; GO:0016020,membrane; GO:0031224,intrinsic component of membrane; GO:0044425,membrane part	--	--	--	--
Cluster-1527.71563	0.7	0.61	0.76	0.78	0	0.38	40.26	35.19	48.74	48.02	0	24.51	-0.83506	0.403522	0.941831	1894	--	--	--	A0A1Q9DZ39_SYMMI SubName: Full=Uncharacterized protein {ECO:0000313|EMBL:OLQ00440.1};	--	GO:0016021,integral component of membrane; GO:0005575,cellular_component; GO:0016020,membrane; GO:0031224,intrinsic component of membrane; GO:0044425,membrane part	--	--	--	--
Cluster-1527.52007	2.43	5.4	4.83	3.65	1.74	1.74	139.98	312.75	311.1	225.78	98.62	113.41	-0.834491	0.0377548	0.601594	1901	--	--	--	--	--	--	--	--	--	--
Cluster-1527.45944	2.66	2.61	1.8	1.76	1.52	0.73	259.65	257.01	196.72	184.5	145.48	80.65	-0.833442	0.0163235	0.477336	3068	--	--	--	A0A1Q9C7E1_SYMMI SubName: Full=Uncharacterized protein {ECO:0000313|EMBL:OLP78852.1};	--	GO:0016021,integral component of membrane; GO:0005575,cellular_component; GO:0016020,membrane; GO:0031224,intrinsic component of membrane; GO:0044425,membrane part	Fusaric acid resistance protein-like	--	--	--
Cluster-1527.52852	1.14	1.24	0.99	0.78	0.53	0.55	38.4	41.87	37.42	28.25	17.6	20.87	-0.833357	0.0597415	0.679422	1205	--	--	--	--	--	--	--	--	--	--
Cluster-1527.48370	1.26	0.45	1.39	0.55	0.65	0.52	145.88	52.57	179.55	68.91	74.29	68.02	-0.832949	0.0609978	0.68261	3588	--	--	--	A0A1Q9C9Z7_SYMMI SubName: Full=Uncharacterized protein {ECO:0000313|EMBL:OLP79750.1};	--	--	von Willebrand factor type A domain	--	--	--
Cluster-1527.73244	1.95	1.61	2.35	1.15	1.2	0.97	94.55	78.68	127.56	59.7	57.37	53.09	-0.831931	0.00700023	0.351667	1638	--	--	--	--	--	--	OST-HTH/LOTUS domain	--	--	--
Cluster-1527.23643	151.4	73.02	169.75	41.96	107.02	69.19	985	473	1266	294	684	515	-0.831905	0.0407156	0.614088	418	--	hypothetical protein CQW23_26303 [Capsicum baccatum]	--	A0A2G2VNI0_CAPBA SubName: Full=Uncharacterized protein {ECO:0000313|EMBL:PHT34503.1};	--	--	--	--	--	--
Cluster-1527.17102	1.37	2.19	1.94	1.47	1.17	0.51	35.98	57.92	57.43	41.49	30.15	15.21	-0.831339	0.096653	0.751716	994	--	--	--	--	--	--	--	--	--	--
Cluster-1527.12688	6.49	4.09	4.71	1.58	2.39	4.35	58.18	36.69	48.11	15.25	21.09	44.55	-0.829046	0.131715	0.797506	490	--	--	--	--	--	--	--	--	--	--
Cluster-1527.7447	2.52	1.7	3.33	1.97	1.21	1.07	87	59	129	73	41	42	-0.828707	0.0392032	0.609479	1233	--	--	--	--	--	--	--	--	--	--
Cluster-1527.28570	1.84	2.48	4.11	1.27	2.31	1.12	142.33	193.26	356.41	106.07	175.56	97.84	-0.828481	0.0402344	0.612661	2480	--	--	--	A0A1Q9D5Q6_SYMMI SubName: Full=Ankyrin repeat domain-containing protein 11 {ECO:0000313|EMBL:OLP90525.1};	--	GO:0016021,integral component of membrane; GO:0005575,cellular_component; GO:0016020,membrane; GO:0031224,intrinsic component of membrane; GO:0044425,membrane part	Ion transport protein	--	--	--
Cluster-1527.68802	4.31	4.2	5.25	3.37	2.28	2.1	227	223	310	191	118	125	-0.826341	0.000949101	0.11638	1761	--	--	--	A0A0M0J9L1_9EUKA SubName: Full=Uncharacterized protein {ECO:0000313|EMBL:KOO23256.1};	--	--	--	--	--	--
Cluster-1527.36130	1.65	0.91	0.84	0.01	1.83	0.06	100.91	55.75	57.29	0.62	109.62	4.44	-0.825	1	1	2005	--	--	--	A0A1Q9DTI8_SYMMI SubName: Full=Ubiquinol oxidase 1a, mitochondrial {ECO:0000313|EMBL:OLP98448.1};	--	GO:0016021,integral component of membrane; GO:0009916,alternative oxidase activity; GO:0003674,molecular_function; GO:0003824,catalytic activity; GO:0016491,oxidoreductase activity; GO:0016682,oxidoreductase activity, acting on diphenols and related substances as donors, oxygen as acceptor; GO:0016679,oxidoreductase activity, acting on diphenols and related substances as donors; GO:0005575,cellul…	CP12 domain	--	--	--
Cluster-1527.36537	25.93	23.72	31.61	13.6	19.02	12.94	310.91	284.91	429.34	175.47	224.18	176.66	-0.824492	0.000835481	0.109339	578	K06630 14-3-3 protein epsilon | (RefSeq) 14-3-3 protein 4-like (A)	CL14-3-3c [Cunninghamia lanceolata]	1433_MESCR RecName: Full=14-3-3-like protein; AltName: Full=G-box-binding factor;	A4UHC5_ALEFU SubName: Full=DNA damage checkpoint protein rad24 {ECO:0000313|EMBL:ABO47883.1};	Multifunctional chaperone (14-3-3 family)	GO:0019904,protein domain specific binding; GO:0005515,protein binding; GO:0003674,molecular_function; GO:0005488,binding	14-3-3 protein	--	--	--
Cluster-1527.5492	10.1	12.17	17.22	8.32	8.78	5.16	352	427	674	312	301	204	-0.82435	0.00375016	0.262782	1243	K13095 splicing factor 1 | (RefSeq) branchpoint-bridging protein-like (A)	PREDICTED: branchpoint-bridging protein-like [Daucus carota subsp. sativus]	SF1_ARATH RecName: Full=Splicing factor-like protein 1 {ECO:0000303|PubMed:24580679}; Short=AtSF1 {ECO:0000303|PubMed:24580679}; Short=SF1 homolog protein {ECO:0000303|PubMed:24580679};	A0A1Q9DHX0_SYMMI SubName: Full=Branchpoint-bridging protein {ECO:0000313|EMBL:OLP94700.1};	Splicing factor 1/branch point binding protein (RRM superfamily)	GO:0005634,nucleus; GO:0005681,spliceosomal complex; GO:0003723,RNA binding; GO:0008270,zinc ion binding; GO:0009738,abscisic acid-activated signaling pathway; GO:0006397,mRNA processing; GO:0009737,response to abscisic acid; GO:0008380,RNA splicing; GO:0003674,molecular_function; GO:0003676,nucleic acid binding; GO:0005488,binding; GO:0097159,organic cyclic compound binding; GO:1901363,heterocyc…	Splicing factor 1 helix-hairpin domain	--	--	--
Cluster-1527.46343	35.93	14.08	33.06	8.35	23.26	14.49	505.01	198.4	525.14	126.31	321.37	231.54	-0.823442	0.0677482	0.699467	638	K02950 small subunit ribosomal protein S12 | (RefSeq) uncharacterized protein LOC114171184 (A)	hypothetical protein LSAT_5X152921 [Lactuca sativa]	--	A0A0V0H8Z9_SOLCH SubName: Full=Putative ovule protein {ECO:0000313|EMBL:JAP16022.1};	--	--	--	--	--	--
Cluster-1527.20328	10.49	8.27	17.14	7.34	8.54	4.51	65	51	122	49	52	32	-0.823096	0.0606892	0.681908	409	--	--	--	--	--	--	--	--	--	--
Cluster-1527.63895	7.57	4.37	11.91	3.75	6.6	3.05	71	41	127.02	37.91	60.81	32.6	-0.821793	0.102826	0.762625	502	--	hypothetical protein BVRB_041110, partial [Beta vulgaris subsp. vulgaris]	--	A0A0J7YMY6_BETVU SubName: Full=Uncharacterized protein {ECO:0000313|EMBL:KMS64936.1}; Flags: Fragment;	--	--	--	--	--	--
Cluster-1527.63990	0.5	0.16	0.67	0.1	0	0.61	49.36	15.66	74.68	11.17	0	68.4	-0.821742	0.484451	0.959501	3123	K21867 potassium channel | (RefSeq) potassium channel SKOR-like isoform X1 (A)	PREDICTED: potassium channel SKOR-like isoform X1 [Nicotiana sylvestris]	AKT1_ARATH RecName: Full=Potassium channel AKT1;	A0A1U7VZH0_NICSY SubName: Full=potassium channel SKOR-like isoform X1 {ECO:0000313|RefSeq:XP_009771768.1};	K+-channel ERG and related proteins, contain PAS/PAC sensor domain	GO:0005887,integral component of plasma membrane; GO:0042802,identical protein binding; GO:0005242,inward rectifier potassium channel activity; GO:0010107,potassium ion import; GO:0006813,potassium ion transport; GO:0034765,regulation of ion transmembrane transport; GO:0042391,regulation of membrane potential; GO:0090333,regulation of stomatal closure; GO:0009651,response to salt stress; GO:00094…	Ankyrin repeats (3 copies)	--	--	--
Cluster-1527.60574	0.28	1.05	1.12	0.44	0.15	0.76	14.41	54.36	64.94	24.34	7.36	44.55	-0.820625	0.283353	0.906129	1729	K21804 protein N-lysine methyltransferase METTL21A [EC:2.1.1.-] | (RefSeq) hypothetical protein (A)	hypothetical protein T459_28682 [Capsicum annuum]	HSP70_PYRSA RecName: Full=Heat shock 70 kDa protein;	A0A1Q9CKG5_SYMMI RecName: Full=DNA topoisomerase {ECO:0000256|RuleBase:RU362092}; EC=5.99.1.2 {ECO:0000256|RuleBase:RU362092};	Predicted methyltransferase	GO:0005524,ATP binding; GO:0000166,nucleotide binding; GO:0003674,molecular_function; GO:0005488,binding; GO:0008144,drug binding; GO:0017076,purine nucleotide binding; GO:0030554,adenyl nucleotide binding; GO:0032553,ribonucleotide binding; GO:0032555,purine ribonucleotide binding; GO:0032559,adenyl ribonucleotide binding; GO:0035639,purine ribonucleoside triphosphate binding; GO:0036094,small m…	Lysine methyltransferase	--	--	--
Cluster-1527.28352	10.43	9.59	8.1	7.06	4.29	4.5	118.32	108.88	104.12	86.17	47.82	58.12	-0.820352	0.00965038	0.394575	559	--	--	--	--	--	--	--	--	--	--
Cluster-1527.55883	2.63	2.8	2.32	1.28	1.47	1.61	38.1	40.59	37.85	19.93	20.91	26.42	-0.820266	0.0623186	0.685122	650	K02575 MFS transporter, NNP family, nitrate/nitrite transporter | (RefSeq) Nitrate transporter (A)	PREDICTED: high affinity nitrate transporter 2.5 [Lupinus angustifolius]	NRT27_ARATH RecName: Full=High affinity nitrate transporter 2.7; Short=AtNRT2:7;	A0A1Q9CBC6_SYMMI SubName: Full=Heat shock 70 kDa protein {ECO:0000313|EMBL:OLP80221.1};	--	GO:0016021,integral component of membrane; GO:0009705,plant-type vacuole membrane; GO:0005886,plasma membrane; GO:0015112,nitrate transmembrane transporter activity; GO:0071249,cellular response to nitrate; GO:0042128,nitrate assimilation; GO:0015706,nitrate transport; GO:0003674,molecular_function; GO:0005215,transporter activity; GO:0022857,transmembrane transporter activity; GO:0008509,anion t…	Major Facilitator Superfamily	--	--	--
Cluster-1527.39044	7.97	10.35	7.7	0.01	6.2	7.93	233.87	305.86	253.81	0.4	179.07	264.09	-0.819902	0.647096	0.979686	1083	--	predicted protein [Chlamydomonas reinhardtii]	--	A0A1Q9EXF7_SYMMI SubName: Full=ATP-dependent zinc metalloprotease FtsH {ECO:0000313|EMBL:OLQ12128.1};	--	GO:0016021,integral component of membrane; GO:0005524,ATP binding; GO:0005525,GTP binding; GO:0004222,metalloendopeptidase activity; GO:0000166,nucleotide binding; GO:0003674,molecular_function; GO:0005488,binding; GO:0008144,drug binding; GO:0017076,purine nucleotide binding; GO:0030554,adenyl nucleotide binding; GO:0032553,ribonucleotide binding; GO:0032555,purine ribonucleotide binding; GO:003…	Interferon-inducible GTPase (IIGP)	--	--	--
Cluster-1527.22756	9.74	12.5	21.62	9.03	9.11	6.85	37	47	96	37	34	30	-0.819847	0.07585	0.718817	338	--	--	--	--	--	--	--	--	--	--
Cluster-1527.46851	4.26	3.39	6.2	4.72	2.63	0.66	327.79	262.71	533.76	390.15	198.86	57.18	-0.819053	0.128432	0.793118	2467	--	--	--	A0A1Q9EFL4_SYMMI SubName: Full=Putative voltage-dependent R-type calcium channel subunit alpha-1E {ECO:0000313|EMBL:OLQ06220.1};	--	GO:0016021,integral component of membrane; GO:0005216,ion channel activity; GO:0003674,molecular_function; GO:0005215,transporter activity; GO:0022857,transmembrane transporter activity; GO:0015075,ion transmembrane transporter activity; GO:0015267,channel activity; GO:0015318,inorganic molecular entity transmembrane transporter activity; GO:0022803,passive transmembrane transporter activity; GO:…	Ion transport protein	--	--	--
Cluster-1527.25957	4.83	1.9	3.58	0.86	2.06	2.76	259.78	102.92	215.66	49.49	108.85	168	-0.818716	0.105077	0.767218	1793	--	--	--	A0A1Q9EIH5_SYMMI SubName: Full=Calcium-dependent protein kinase 2 {ECO:0000313|EMBL:OLQ07178.1};	--	GO:0005524,ATP binding; GO:0004672,protein kinase activity; GO:0000166,nucleotide binding; GO:0003674,molecular_function; GO:0005488,binding; GO:0008144,drug binding; GO:0017076,purine nucleotide binding; GO:0030554,adenyl nucleotide binding; GO:0032553,ribonucleotide binding; GO:0032555,purine ribonucleotide binding; GO:0032559,adenyl ribonucleotide binding; GO:0035639,purine ribonucleoside trip…	Protein of unknown function (DUF2570)	--	--	--
Cluster-1527.82040	2.27	1.98	3.95	1.47	1.71	1.43	66	58	129	46	49	47	-0.81851	0.0391533	0.609274	1075	K20029 palmitoyltransferase ZDHHC3/7/25 [EC:2.3.1.225] | (RefSeq) probable protein S-acyltransferase 15 isoform X1 (A)	PREDICTED: probable protein S-acyltransferase 15 [Vigna angularis]	ZDH20_ARATH RecName: Full=Probable protein S-acyltransferase 15; EC=2.3.1.225; AltName: Full=Probable palmitoyltransferase At5g04270; AltName: Full=Zinc finger DHHC domain-containing protein At5g04270;	A0A1Q9CZM9_SYMMI RecName: Full=Palmitoyltransferase {ECO:0000256|RuleBase:RU079119}; EC=2.3.1.225 {ECO:0000256|RuleBase:RU079119};	Predicted DHHC-type Zn-finger protein	GO:0030659,cytoplasmic vesicle membrane; GO:0005789,endoplasmic reticulum membrane; GO:0016021,integral component of membrane; GO:0019706,protein-cysteine S-palmitoyltransferase activity; GO:0003674,molecular_function; GO:0003824,catalytic activity; GO:0016409,palmitoyltransferase activity; GO:0016417,S-acyltransferase activity; GO:0016740,transferase activity; GO:0016746,transferase activity, tr…	DHHC palmitoyltransferase	--	--	--
Cluster-1527.87236	0.85	0.59	0.91	0.72	0.65	0	37	26	44.4	33.48	27.67	0	-0.818014	0.417341	0.946332	1495	--	--	--	A0A1Q9ETK6_SYMMI SubName: Full=Calcium-dependent protein kinase 1 {ECO:0000313|EMBL:OLQ10762.1};	--	GO:0005524,ATP binding; GO:0004672,protein kinase activity; GO:0000166,nucleotide binding; GO:0003674,molecular_function; GO:0005488,binding; GO:0008144,drug binding; GO:0017076,purine nucleotide binding; GO:0030554,adenyl nucleotide binding; GO:0032553,ribonucleotide binding; GO:0032555,purine ribonucleotide binding; GO:0032559,adenyl ribonucleotide binding; GO:0035639,purine ribonucleoside trip…	--	--	--	--
Cluster-1527.55862	0	1.1	1	0.29	0	0.85	0	184.89	186.08	51.69	0	160.65	-0.816789	0.769142	0.987785	5079	K00381 sulfite reductase (NADPH) hemoprotein beta-component [EC:1.8.1.2] | (RefSeq) sulfite reductase [NADPH] subunit beta-like (A)	pyruvate-ferredoxin oxidoreductase [Volvox carteri f. nagariensis]	PNO_EUGGR RecName: Full=Pyruvate dehydrogenase [NADP(+)], mitochondrial; EC=1.16.1.5 {ECO:0000269|PubMed:8373179}; EC=1.2.1.51 {ECO:0000269|PubMed:3110154}; AltName: Full=Aquacobalamin reductase [NADPH]; AltName: Full=EgPNOmt; AltName: Full=Pyruvate:NADP(+) oxidoreductase; Flags: Precursor;	A0A1Q9E245_SYMMI SubName: Full=Pyruvate dehydrogenase [NADP(+)] {ECO:0000313|EMBL:OLQ01481.1};	Sulfite reductase (ferredoxin)	GO:0005739,mitochondrion; GO:0051539,4 iron, 4 sulfur cluster binding; GO:0050444,aquacobalamin reductase (NADPH) activity; GO:0010181,FMN binding; GO:0005506,iron ion binding; GO:0016491,oxidoreductase activity; GO:0050243,pyruvate dehydrogenase (NADP+) activity; GO:0030976,thiamine pyrophosphate binding; GO:0045333,cellular respiration; GO:0022900,electron transport chain; GO:0006090,pyruvate m…	Pyruvate flavodoxin/ferredoxin oxidoreductase, thiamine diP-bdg	--	--	--
Cluster-1527.80512	3.9	4.23	5.37	3.7	2.42	1.58	127.96	139.79	197.81	130.61	77.97	58.95	-0.815968	0.0183661	0.493462	1184	--	--	--	--	--	--	--	--	--	--
Cluster-1527.45551	1.01	1.51	1.65	0.81	1.04	0.52	61.92	93.36	113.11	53.32	62.7	36.19	-0.813746	0.0376695	0.601317	2008	K03283 heat shock 70kDa protein 1/2/6/8 | (RefSeq) heat shock 70 kDa protein (A)	heat shock 70 kDa protein [Carica papaya]	HSP70_ACHKL RecName: Full=Heat shock 70 kDa protein;	J7F388_PROMN SubName: Full=Heat shock protein 70 {ECO:0000313|EMBL:AEV66161.1};	Molecular chaperones HSP70/HSC70, HSP70 superfamily	GO:0005524,ATP binding; GO:0000166,nucleotide binding; GO:0003674,molecular_function; GO:0005488,binding; GO:0008144,drug binding; GO:0017076,purine nucleotide binding; GO:0030554,adenyl nucleotide binding; GO:0032553,ribonucleotide binding; GO:0032555,purine ribonucleotide binding; GO:0032559,adenyl ribonucleotide binding; GO:0035639,purine ribonucleoside triphosphate binding; GO:0036094,small m…	Hsp70 protein	--	--	--
Cluster-1527.74322	4.31	1.78	6.68	3.26	1.52	2.45	103.7	42.96	180.88	84.44	35.84	66.8	-0.812749	0.11866	0.781088	929	--	--	--	--	--	--	--	--	--	--
Cluster-1527.15984	0.6	1.01	2.39	1.47	0.85	0	35.17	59.88	157.48	93.31	49.5	0	-0.810126	0.626319	0.977733	1942	--	--	--	R1E0J2_EMIHU SubName: Full=Uncharacterized protein {ECO:0000313|EMBL:EOD41173.1, ECO:0000313|EnsemblProtists:EOD41173};	--	GO:0005507,copper ion binding; GO:0009055,electron transfer activity; GO:0003674,molecular_function; GO:0005488,binding; GO:0046872,metal ion binding; GO:0043167,ion binding; GO:0043169,cation binding; GO:0046914,transition metal ion binding; GO:0003824,catalytic activity; GO:0016491,oxidoreductase activity	Glycosyl hydrolases family 43	--	--	--
Cluster-1527.19147	10.95	8.9	11.91	6.53	4.91	6.46	134	109	165	86	59	90	-0.80986	0.0048448	0.303635	585	--	--	--	--	--	--	PT repeat	--	--	--
Cluster-1527.83497	1.73	1.54	0.54	1.03	1.07	0.13	64.99	57.98	22.71	41.62	39.3	5.38	-0.80955	0.293013	0.907588	1319	--	--	--	A0A1Q9EYQ9_SYMMI SubName: Full=Aspartyl/asparaginyl beta-hydroxylase {ECO:0000313|EMBL:OLQ12502.1};	Aspartyl beta-hydroxylase	GO:0018193,peptidyl-amino acid modification; GO:0008152,metabolic process; GO:0006464,cellular protein modification process; GO:0006807,nitrogen compound metabolic process; GO:0008150,biological_process; GO:0009987,cellular process; GO:0019538,protein metabolic process; GO:0036211,protein modification process; GO:0043170,macromolecule metabolic process; GO:0043412,macromolecule modification; GO:0…	Aspartyl/Asparaginyl beta-hydroxylase	--	--	--
Cluster-1527.23670	0	2.85	2.73	0.69	1.61	0.86	0	193.83	206.5	50.17	107.1	65.41	-0.8076	0.649682	0.979686	2194	--	--	--	R1G3J4_EMIHU SubName: Full=Uncharacterized protein {ECO:0000313|EMBL:EOD40429.1, ECO:0000313|EnsemblProtists:EOD40429};	--	GO:0020037,heme binding; GO:0003674,molecular_function; GO:0005488,binding; GO:0046906,tetrapyrrole binding; GO:0048037,cofactor binding; GO:0097159,organic cyclic compound binding; GO:1901363,heterocyclic compound binding	TIR domain	--	--	--
Cluster-1527.49635	8.57	9.2	13.05	6.57	4.56	6.28	273	295	467	225	143	227	-0.807552	0.00252777	0.210904	1156	--	--	--	A0A1Q9DDQ4_SYMMI SubName: Full=Reticulocyte-binding protein 2-like a {ECO:0000313|EMBL:OLP93318.1};	--	--	--	--	--	--
Cluster-1527.3745	0.54	1.23	1.4	0.45	0.8	0.55	20	46	58	18	29	23	-0.806495	0.145925	0.81482	1306	K16281 RING-H2 zinc finger protein RHA1 | (RefSeq) probable E3 ubiquitin-protein ligase RHA1A (A)	--	--	--	--	--	Ring finger domain	--	--	--
Cluster-1527.71867	12.21	14.64	12.86	10.11	7.14	5.59	121.66	145.86	145.56	108.38	69.95	63.45	-0.806267	0.00632845	0.339541	519	--	--	--	A0A1Q9CLA0_SYMMI RecName: Full=Chloride channel protein {ECO:0000256|RuleBase:RU361221};	--	GO:0016021,integral component of membrane; GO:0016301,kinase activity; GO:0046872,metal ion binding; GO:0003950,NAD+ ADP-ribosyltransferase activity; GO:0005247,voltage-gated chloride channel activity; GO:0003674,molecular_function; GO:0003824,catalytic activity; GO:0016740,transferase activity; GO:0016772,transferase activity, transferring phosphorus-containing groups; GO:0005488,binding; GO:004…	--	--	--	--
Cluster-1527.14908	1.7	2.12	2.23	0.45	3.01	0	175.11	220.42	256.91	49.59	305.14	0	-0.806217	0.667402	0.97999	3225	K13448 calcium-binding protein CML | (RefSeq) calcium-binding protein CML19 (A)	hypothetical protein AALP_AA7G246900 [Arabis alpina]	CML19_ARATH RecName: Full=Calcium-binding protein CML19 {ECO:0000303|Ref.7}; AltName: Full=Calmodulin-like protein 19 {ECO:0000303|Ref.7}; AltName: Full=Centrin 2 {ECO:0000303|PubMed:15155891}; Short=AtCEN2 {ECO:0000303|PubMed:15155891};	A0A1Q9EYP5_SYMMI SubName: Full=UDP-N-acetylglucosamine--peptide N-acetylglucosaminyltransferase 110 kDa subunit {ECO:0000313|EMBL:OLQ12505.1};	Ca2+-binding protein (centrin/caltractin), EF-Hand superfamily protein	GO:0005737,cytoplasm; GO:0005634,nucleus; GO:0005509,calcium ion binding; GO:0006281,DNA repair; GO:0003674,molecular_function; GO:0005488,binding; GO:0046872,metal ion binding; GO:0043167,ion binding; GO:0043169,cation binding; GO:0008152,metabolic process; GO:0006139,nucleobase-containing compound metabolic process; GO:0006259,DNA metabolic process; GO:0006725,cellular aromatic compound metabol…	EF-hand domain pair	--	--	--
Cluster-1527.4786	2.54	1.09	3.69	1.56	1.06	1.52	44	19	72	29	18	30	-0.805183	0.155506	0.825203	733	K03022 DNA-directed RNA polymerase III subunit RPC8 | (RefSeq) DNA-directed RNA polymerase III subunit RPC8 (A)	hypothetical protein GPECTOR_124g492 [Gonium pectorale]	--	M4BL77_HYAAE SubName: Full=Uncharacterized protein {ECO:0000313|EnsemblProtists:HpaP807162};	DNA-directed RNA polymerase subunit E'	GO:0003899,DNA-directed 5'-3' RNA polymerase activity; GO:0006351,transcription, DNA-templated; GO:0003674,molecular_function; GO:0003824,catalytic activity; GO:0016740,transferase activity; GO:0016772,transferase activity, transferring phosphorus-containing groups; GO:0016779,nucleotidyltransferase activity; GO:0034062,5'-3' RNA polymerase activity; GO:0097747,RNA polymerase activity; GO:0140098…	RNA polymerase III subunit Rpc25	--	--	--
Cluster-1527.8250	0.16	0.21	0.25	0.87	0.77	3.18	10	13	17	57	46	220	3.00613	6.50569e-06	0.00486719	2005	K04043 molecular chaperone DnaK | (RefSeq) heat shock 70 kDa protein, mitochondrial-like (A)	predicted protein [Physcomitrella patens]	HSP7M_PHAVU RecName: Full=Heat shock 70 kDa protein, mitochondrial; Flags: Precursor;	A0A2D4C022_PYTIN SubName: Full=Heat shock 70 kDa protein, mitochondrial {ECO:0000313|EMBL:GAX99732.1};	Molecular chaperones mortalin/PBP74/GRP75, HSP70 superfamily	GO:0005739,mitochondrion; GO:0005524,ATP binding; GO:0051082,unfolded protein binding; GO:0006457,protein folding; GO:0000166,nucleotide binding; GO:0003674,molecular_function; GO:0005488,binding; GO:0008144,drug binding; GO:0017076,purine nucleotide binding; GO:0030554,adenyl nucleotide binding; GO:0032553,ribonucleotide binding; GO:0032555,purine ribonucleotide binding; GO:0032559,adenyl ribonu…	Hsp70 protein	--	--	--
Cluster-1527.33429	4.92	3.71	5.75	2.6	4.09	1.52	144.26	109.48	189.52	82.06	117.98	50.56	-0.804354	0.0422253	0.619696	1082	--	--	--	--	--	--	--	--	--	--
Cluster-1527.38432	5.35	2.32	1.61	3.04	1.41	0.94	117.43	51.21	39.65	71.81	30.37	23.45	-0.803324	0.18363	0.850328	867	K05309 microsomal prostaglandin-E synthase 2 [EC:5.3.99.3] | (RefSeq) prostaglandin E synthase 2 (A)	prostaglandin E synthase 2 [Durio zibethinus]	--	A0A1Q9CXF0_SYMMI SubName: Full=Prostaglandin E synthase 2 {ECO:0000313|EMBL:OLP87604.1};	Glutathione S-transferase-related protein	GO:0016021,integral component of membrane; GO:0005575,cellular_component; GO:0016020,membrane; GO:0031224,intrinsic component of membrane; GO:0044425,membrane part	Glutathione S-transferase N-terminal domain	--	--	--
Cluster-1527.45378	32.71	30.09	47.54	24.21	21.95	17.61	85	77	147	68	56	53	-0.802322	0.0193313	0.503503	301	--	--	--	--	--	--	--	--	--	--
Cluster-1527.2360	2.36	1.49	3.12	1.83	1.12	1.04	60	38	89	50	28	30	-0.801552	0.0744509	0.715004	968	--	--	--	F0YHT5_AURAN SubName: Full=Uncharacterized protein {ECO:0000313|EMBL:EGB05291.1};	--	GO:0008168,methyltransferase activity; GO:0003674,molecular_function; GO:0003824,catalytic activity; GO:0016740,transferase activity; GO:0016741,transferase activity, transferring one-carbon groups	--	--	--	--
Cluster-1527.48854	183.97	201.6	149.16	126.68	98.82	82.61	125	133	127	93	66	66	-0.800446	0.0033454	0.247091	228	--	--	--	A0A0K2STQ7_ALETA RecName: Full=Ammonium transporter {ECO:0000256|RuleBase:RU362002};	--	GO:0016021,integral component of membrane; GO:0008519,ammonium transmembrane transporter activity; GO:0003674,molecular_function; GO:0005215,transporter activity; GO:0022857,transmembrane transporter activity; GO:0008324,cation transmembrane transporter activity; GO:0015075,ion transmembrane transporter activity; GO:0005575,cellular_component; GO:0016020,membrane; GO:0031224,intrinsic component o…	--	--	--	--
Cluster-1527.29348	5.19	8.69	7.45	0	9.74	2.3	390.98	660.66	628.96	0	721.99	196.35	-0.800442	0.684949	0.981244	2421	--	--	--	R1CIX8_EMIHU SubName: Full=Uncharacterized protein {ECO:0000313|EMBL:EOD22818.1, ECO:0000313|EnsemblProtists:EOD22818};	--	GO:0016021,integral component of membrane; GO:0005575,cellular_component; GO:0016020,membrane; GO:0031224,intrinsic component of membrane; GO:0044425,membrane part	--	--	--	--
Cluster-1527.64676	1.62	0.75	0.53	0.38	0.17	1.03	66.18	31.1	24.19	16.65	6.84	47.98	-0.800437	0.295832	0.909228	1420	--	--	--	--	--	--	Ankyrin repeats (3 copies)	--	--	--
Cluster-1527.50099	4.17	5.41	3.43	1.7	2.17	3.41	65.33	85.07	60.71	28.68	33.42	60.64	-0.799333	0.0718727	0.708884	685	--	--	--	--	--	--	--	--	--	--
Cluster-1527.5193	1.57	1.59	1.92	1.18	0.7	1.01	48	49	66	39	21	35	-0.798676	0.0468618	0.63398	1121	--	--	GATL3_ARATH RecName: Full=Probable galacturonosyltransferase-like 3; EC=2.4.1.-;	A0A1Q9D255_SYMMI SubName: Full=Uncharacterized protein {ECO:0000313|EMBL:OLP89269.1};	--	GO:0005794,Golgi apparatus; GO:0000139,Golgi membrane; GO:0016021,integral component of membrane; GO:0047262,polygalacturonate 4-alpha-galacturonosyltransferase activity; GO:0016757,transferase activity, transferring glycosyl groups; GO:0071555,cell wall organization; GO:0045489,pectin biosynthetic process; GO:0000271,polysaccharide biosynthetic process; GO:0003674,molecular_function; GO:0003824,…	Glycosyl transferase family 8	--	--	--
Cluster-1527.16232	3.77	5.89	3.55	5.25	0.66	1.81	142.09	223.37	150.07	212.75	24.38	77.25	-0.798244	0.189802	0.85449	1325	--	--	--	--	--	--	--	--	--	--
Cluster-1527.6739	0.8	0.99	2.15	0.12	0.24	1.78	24.77	30.99	74.98	4.08	7.29	62.96	-0.797273	0.402626	0.941831	1134	--	--	--	--	--	--	MgtE intracellular N domain	--	--	--
Cluster-1527.23394	3.51	3.43	5.9	3.1	2.5	1.79	271	267	510	257	190	156	-0.796728	0.00823102	0.372252	2473	--	--	--	A0A1Q9DTT3_SYMMI SubName: Full=Uncharacterized protein {ECO:0000313|EMBL:OLP98582.1};	--	GO:0003677,DNA binding; GO:0006355,regulation of transcription, DNA-templated; GO:0003674,molecular_function; GO:0003676,nucleic acid binding; GO:0005488,binding; GO:0097159,organic cyclic compound binding; GO:1901363,heterocyclic compound binding; GO:0008152,metabolic process; GO:0006139,nucleobase-containing compound metabolic process; GO:0006351,transcription, DNA-templated; GO:0006725,cellula…	'Cold-shock' DNA-binding domain	CSD	TF	CSD
Cluster-1527.71014	4.86	3.28	3.18	1.95	3.33	1.26	142.8	96.84	104.84	61.45	96.05	41.86	-0.796377	0.0579685	0.676946	1083	--	--	--	--	--	--	--	--	--	--
Cluster-1527.85565	0.53	0.45	1.1	0.69	0.26	0.26	34	29	78	47	16	19	-0.794919	0.181618	0.848699	2078	--	--	--	A0A1Q9F7G7_SYMMI SubName: Full=Alpha-1,3-mannosyl-glycoprotein 4-beta-N-acetylglucosaminyltransferase C {ECO:0000313|EMBL:OLQ15628.1};	--	GO:0016020,membrane; GO:0016758,transferase activity, transferring hexosyl groups; GO:0005975,carbohydrate metabolic process; GO:0003674,molecular_function; GO:0003824,catalytic activity; GO:0016740,transferase activity; GO:0016757,transferase activity, transferring glycosyl groups; GO:0008152,metabolic process; GO:0008150,biological_process; GO:0044238,primary metabolic process; GO:0071704,organ…	N-Acetylglucosaminyltransferase-IV (GnT-IV) conserved region	--	--	--
Cluster-1527.22811	11.19	14.79	17.21	11.62	8.64	4.99	33	43	60	37	25	17	-0.794777	0.0964496	0.751243	312	--	--	--	--	--	--	--	--	--	--
Cluster-1527.19283	5.56	5.73	4.86	3.38	2.33	3.47	139.12	144.2	136.65	90.87	57.44	98.55	-0.794457	0.00650284	0.343634	957	--	--	--	A0A1Q9C2Y3_SYMMI SubName: Full=Putative membrane protein mmpL11 {ECO:0000313|EMBL:OLP77271.1};	--	GO:0016021,integral component of membrane; GO:0003824,catalytic activity; GO:0003677,DNA binding; GO:0008152,metabolic process; GO:0003674,molecular_function; GO:0003676,nucleic acid binding; GO:0005488,binding; GO:0097159,organic cyclic compound binding; GO:1901363,heterocyclic compound binding; GO:0008150,biological_process; GO:0005575,cellular_component; GO:0016020,membrane; GO:0031224,intrins…	--	--	--	--
Cluster-1527.49209	38.85	27.82	43.9	18.92	19.79	24.36	158	112	208	83	79	114	-0.792462	0.0117352	0.419495	346	--	--	--	--	--	--	--	--	--	--
Cluster-1527.53615	4.65	6.37	1.5	2.98	4.42	0	290.66	400.72	105.23	200	271.49	0	-0.791579	0.671561	0.980263	2045	K09490 endoplasmic reticulum chaperone BiP [EC:3.6.4.10] | (RefSeq) Hsp 70 family protein precursor (A)	hypothetical protein GLYMA_05G219600 [Glycine max]	BIP_SPIOL RecName: Full=Luminal-binding protein; Short=BiP; AltName: Full=78 kDa glucose-regulated protein homolog; Short=GRP-78; Flags: Precursor;	Q8S4R0_CRYCO SubName: Full=BiP {ECO:0000313|EMBL:AAM02971.2}; Flags: Fragment;	Molecular chaperones GRP78/BiP/KAR2, HSP70 superfamily	GO:0005788,endoplasmic reticulum lumen; GO:0005524,ATP binding; GO:0000166,nucleotide binding; GO:0003674,molecular_function; GO:0005488,binding; GO:0008144,drug binding; GO:0017076,purine nucleotide binding; GO:0030554,adenyl nucleotide binding; GO:0032553,ribonucleotide binding; GO:0032555,purine ribonucleotide binding; GO:0032559,adenyl ribonucleotide binding; GO:0035639,purine ribonucleoside …	NAD-specific glutamate dehydrogenase	--	--	--
Cluster-1527.48811	0.5	0.66	0.72	0.3	0.38	0.39	27.16	35.9	43.66	17.77	20.09	24.3	-0.789578	0.0943841	0.748472	1809	--	protein MEI2-like 6 [Olea europaea var. sylvestris]	--	A0A1Q9EUC1_SYMMI SubName: Full=Retrovirus-related Pol polyprotein from type-1 retrotransposable element R2 {ECO:0000313|EMBL:OLQ11025.1};	Protein Mei2, essential for commitment to meiosis, and related proteins	GO:0003676,nucleic acid binding; GO:0036459,thiol-dependent ubiquitinyl hydrolase activity; GO:0016579,protein deubiquitination; GO:0003674,molecular_function; GO:0005488,binding; GO:0097159,organic cyclic compound binding; GO:1901363,heterocyclic compound binding; GO:0003824,catalytic activity; GO:0008234,cysteine-type peptidase activity; GO:0008233,peptidase activity; GO:0070011,peptidase activ…	RNA recognition motif. (a.k.a. RRM, RBD, or RNP domain)	--	--	--
Cluster-1527.65696	1.55	0.76	1.18	0.92	0.34	0.75	227.01	112.77	193.11	144.93	48.22	123.94	-0.789412	0.0664508	0.6957	4483	--	--	--	A0A1Q9CP68_SYMMI SubName: Full=Pentatricopeptide repeat-containing protein, mitochondrial {ECO:0000313|EMBL:OLP84721.1};	--	--	--	--	--	--
Cluster-1527.75103	9.93	13.23	15.63	9.02	5.85	7.41	383.75	514.81	677.46	374.66	222.44	324.61	-0.788915	0.00187887	0.178554	1353	--	--	--	--	--	--	--	--	--	--
Cluster-1527.13748	4.91	4.72	11.12	5.11	2.95	3.87	212	205	538	237	125	189	-0.788908	0.0416357	0.617909	1484	--	--	--	F0Y0D1_AURAN SubName: Full=Uncharacterized protein {ECO:0000313|EMBL:EGB11200.1};	--	--	--	--	--	--
Cluster-1527.14910	7.3	2.25	8.44	3.46	2.3	4.43	87.24	27	114.37	44.54	27	60.35	-0.788171	0.158427	0.828134	577	K01358 ATP-dependent Clp protease, protease subunit [EC:3.4.21.92] | (RefSeq) uncharacterized protein LOC111404774 (A)	hypothetical protein BVRB_041110, partial [Beta vulgaris subsp. vulgaris]	--	A0A0J7YMY6_BETVU SubName: Full=Uncharacterized protein {ECO:0000313|EMBL:KMS64936.1}; Flags: Fragment;	--	--	--	--	--	--
Cluster-1527.71099	11.43	20.37	12.52	7.49	14.35	4.12	31.52	55.33	40.94	22.3	38.84	13.16	-0.787901	0.170351	0.837382	306	--	--	--	--	--	--	--	--	--	--
Cluster-1527.54482	1.5	2.04	2.21	1.48	1.25	0.62	86.31	118.24	142.39	91.38	70.95	40.25	-0.787773	0.0389032	0.607832	1901	--	--	--	--	--	--	--	--	--	--
Cluster-1527.65536	0.77	0.62	1.05	0.58	0.29	0.53	54.4	44.1	82.8	43.57	19.89	41.8	-0.787002	0.0778983	0.723756	2274	--	predicted protein [Micromonas pusilla CCMP1545]	--	C1N0B3_MICPC SubName: Full=Predicted protein {ECO:0000313|EMBL:EEH54234.1};	--	GO:0016021,integral component of membrane; GO:0005575,cellular_component; GO:0016020,membrane; GO:0031224,intrinsic component of membrane; GO:0044425,membrane part	NAD-dependent DNA ligase adenylation domain	--	--	--
Cluster-1527.66646	1.14	1.42	2.84	0.52	1.27	1.28	40.17	50.63	112.79	19.67	44.14	51.09	-0.786986	0.154265	0.823711	1257	--	--	--	R1CIX8_EMIHU SubName: Full=Uncharacterized protein {ECO:0000313|EMBL:EOD22818.1, ECO:0000313|EnsemblProtists:EOD22818};	--	GO:0016021,integral component of membrane; GO:0005575,cellular_component; GO:0016020,membrane; GO:0031224,intrinsic component of membrane; GO:0044425,membrane part	--	--	--	--
Cluster-1527.15644	13.42	10.92	16.58	6.73	8.05	8.6	497	407	689	268	293	361	-0.784713	0.00114752	0.131119	1306	--	--	--	A0A1Q9CTE5_SYMMI SubName: Full=Peroxisomal targeting signal 1 receptor {ECO:0000313|EMBL:OLP86196.1};	--	--	Tetratricopeptide repeat	--	--	--
Cluster-1527.38285	36.7	56.6	52.94	33.92	27.84	23.02	691.16	1070.6	1123.61	687.17	515.49	492.4	-0.784537	0.000571097	0.0869503	777	--	--	--	A0A1Q9E0U5_SYMMI SubName: Full=Uncharacterized protein {ECO:0000313|EMBL:OLQ01046.1};	--	--	--	--	--	--
Cluster-1527.51790	1.39	1.3	2.05	1.17	0.59	0.97	114.6	108.15	189.21	103.61	47.77	90.27	-0.78367	0.0287367	0.562941	2632	--	--	--	--	--	--	NAD:arginine ADP-ribosyltransferase	--	--	--
Cluster-1527.59499	0.08	0.26	0.45	2.15	2.96	1.31	3.87	12.17	23	105.78	133	67.82	3.00485	2.14702e-07	0.000445966	1559	--	--	--	--	--	--	--	--	--	--
Cluster-1527.74288	2.7	4.05	3.02	2.05	1.23	2.26	48.27	72.9	60.99	39.54	21.72	45.92	-0.78295	0.0663802	0.695491	750	--	--	--	A0A1Q9C4X7_SYMMI SubName: Full=Protein MEI2-like 4 {ECO:0000313|EMBL:OLP77970.1};	--	GO:0003676,nucleic acid binding; GO:0003674,molecular_function; GO:0005488,binding; GO:0097159,organic cyclic compound binding; GO:1901363,heterocyclic compound binding	--	--	--	--
Cluster-1527.5540	78.89	62.2	52.25	45.69	34.29	32.09	150	116	120	94	64	71	-0.782601	0.00731973	0.357144	278	--	--	--	--	--	--	--	--	--	--
Cluster-1527.52567	0.02	2.87	3.1	1.74	0	1.71	0.7	87.94	106.05	56.95	0.1	59.01	-0.782228	0.705139	0.982935	1115	--	--	--	--	--	--	--	--	--	--
Cluster-1527.48836	0.87	1.1	1.29	1.26	0.69	0	56.43	71.95	93.73	87.89	43.89	0	-0.781917	0.616241	0.977205	2123	--	--	--	--	--	--	HEAT repeats	--	--	--
Cluster-1527.13978	1.67	2.13	3.62	1.97	1.67	0.7	67	86	163	85	66	32	-0.781776	0.0956876	0.750219	1396	K16279 E3 ubiquitin-protein ligase KEG [EC:2.7.11.1 2.3.2.27] | (RefSeq) E3 ubiquitin-protein ligase KEG (A)	E3 ubiquitin-protein ligase KEG [Helianthus annuus]	KEG_ARATH RecName: Full=E3 ubiquitin-protein ligase KEG; EC=2.3.2.27; EC=2.7.11.1; AltName: Full=Protein KEEP ON GOING; AltName: Full=RING finger protein KEG; AltName: Full=RING-type E3 ubiquitin transferase KEG {ECO:0000305};	A0A1Q9DDP5_SYMMI SubName: Full=Methylsterol monooxygenase 1-3 {ECO:0000313|EMBL:OLP93180.1};	FOG: Ankyrin repeat	GO:0005769,early endosome; GO:0005802,trans-Golgi network; GO:0005524,ATP binding; GO:0046872,metal ion binding; GO:0004672,protein kinase activity; GO:0043621,protein self-association; GO:0004674,protein serine/threonine kinase activity; GO:0004842,ubiquitin-protein transferase activity; GO:0009738,abscisic acid-activated signaling pathway; GO:0006952,defense response; GO:0048589,developmental g…	Ankyrin repeats (3 copies)	--	--	--
Cluster-1527.19429	9.53	8.51	15.52	8.98	6.19	4.39	269.28	241.81	492.86	272.71	171.89	140.79	-0.781103	0.0182787	0.492856	1051	--	--	--	A0A1Q9ENT4_SYMMI SubName: Full=Vacuolar protein sorting-associated protein 13C {ECO:0000313|EMBL:OLQ09105.1};	--	--	Glycosyl hydrolase family 61	--	--	--
Cluster-1527.34906	3289.94	1312.82	2660.01	1093.52	1613.82	1481.22	9070	3566	8699	3257	4367	4726	-0.780335	0.0207276	0.514739	306	--	hypothetical protein [Arabidopsis thaliana]	--	Q0WLP3_ARATH SubName: Full=Uncharacterized protein {ECO:0000313|EMBL:BAF01964.1};	--	--	--	--	--	--
Cluster-1527.10221	0.29	0	0.94	0	0.58	0.12	21.12	0	76.34	0	41.24	9.8	-0.778394	0.757781	0.986998	2344	--	--	--	A0A1Q9F695_SYMMI SubName: Full=Persulfide dioxygenase ETHE1, mitochondrial {ECO:0000313|EMBL:OLQ15214.1};	--	GO:0016021,integral component of membrane; GO:0051213,dioxygenase activity; GO:0003674,molecular_function; GO:0003824,catalytic activity; GO:0016491,oxidoreductase activity; GO:0005575,cellular_component; GO:0016020,membrane; GO:0031224,intrinsic component of membrane; GO:0044425,membrane part	Calcium-dependent channel, 7TM region, putative phosphate	--	--	--
Cluster-1527.74347	3.62	4.44	4.06	2.72	2.41	1.92	148.34	183.15	186.73	119.97	97.05	89.23	-0.776869	0.0016	0.163323	1421	--	--	--	A0A1Q9F725_SYMMI SubName: Full=LINE-1 reverse transcriptase-like {ECO:0000313|EMBL:OLQ15483.1};	--	GO:0003964,RNA-directed DNA polymerase activity; GO:0003674,molecular_function; GO:0003824,catalytic activity; GO:0016740,transferase activity; GO:0016772,transferase activity, transferring phosphorus-containing groups; GO:0016779,nucleotidyltransferase activity; GO:0034061,DNA polymerase activity; GO:0140097,catalytic activity, acting on DNA	TIR domain	--	--	--
Cluster-1527.16961	0.55	1	0.73	0.46	0.13	0.7	29.12	52.96	42.96	25.88	6.51	42	-0.775877	0.234888	0.884411	1762	--	--	--	A0A1Q9E522_SYMMI SubName: Full=Uncharacterized protein {ECO:0000313|EMBL:OLQ02517.1};	--	GO:0005509,calcium ion binding; GO:0003674,molecular_function; GO:0005488,binding; GO:0046872,metal ion binding; GO:0043167,ion binding; GO:0043169,cation binding	EF hand	--	--	--
Cluster-1527.37347	2.79	0.12	2.41	3.14	0	0.1	81.76	3.46	79.47	99.07	0	3.48	-0.773544	0.719356	0.983948	1082	K00278 L-aspartate oxidase [EC:1.4.3.16] | (RefSeq) predicted protein (A)	predicted protein [Micromonas pusilla CCMP1545]	NADB_ORYSJ RecName: Full=L-aspartate oxidase, chloroplastic; EC=1.4.3.16; AltName: Full=Protein FLAGELLIN-INSENSITIVE 4; Flags: Precursor;	Q5ENL4_HETTR SubName: Full=Probable fumerate reductase {ECO:0000313|EMBL:AAW79379.1}; Flags: Fragment;	Fumarate reductase, flavoprotein subunit	GO:0009507,chloroplast; GO:0008734,L-aspartate oxidase activity; GO:0044318,L-aspartate:fumarate oxidoreductase activity; GO:0009435,NAD biosynthetic process; GO:0001716,L-amino-acid oxidase activity; GO:0003674,molecular_function; GO:0003824,catalytic activity; GO:0016491,oxidoreductase activity; GO:0015922,aspartate oxidase activity; GO:0016638,oxidoreductase activity, acting on the CH-NH2 grou…	FAD binding domain	--	--	--
Cluster-1527.43772	0.91	0.51	0.81	1.06	0.29	0	47.06	26.51	46.96	58.91	15.01	0	-0.77238	0.473	0.957842	1735	--	predicted protein [Micromonas pusilla CCMP1545]	--	A0A1Q9DKR5_SYMMI SubName: Full=Uncharacterized protein {ECO:0000313|EMBL:OLP95777.1};	--	--	Bacterial extracellular solute-binding proteins, family 3	--	--	--
Cluster-1527.68447	1.56	1.42	4	2.41	1.12	0.64	54.27	49.9	156.8	90.31	38.45	25.33	-0.771757	0.192487	0.856538	1244	--	--	--	--	--	--	--	--	--	--
Cluster-1527.25718	4.22	2.96	3.15	1.36	2.33	2.22	168.68	119.3	141.14	58.65	91.78	100.75	-0.77166	0.0246958	0.542328	1392	--	--	--	--	--	--	Mobile element transfer protein	--	--	--
Cluster-1527.27229	0.55	0.86	1.08	0.5	0.44	0.5	25.17	39.88	55.8	24.89	19.77	26.03	-0.771302	0.107353	0.770319	1569	--	--	--	--	--	--	--	--	--	--
Cluster-1527.74897	5.48	3.43	6.01	3.24	2.71	2.72	181	114	223	115	88	102	-0.771113	0.00957942	0.394575	1190	--	--	--	--	--	--	Phytanoyl-CoA dioxygenase (PhyH)	--	--	--
Cluster-1527.82323	17.77	20.2	21.6	14.19	11.15	9.54	86	97	121	74	53	53	-0.771074	0.00983948	0.396551	369	--	--	--	--	--	--	--	--	--	--
Cluster-1527.33531	8.6	1.73	4.95	7.66	0.02	1.5	299.94	60.65	193.92	287.52	0.6	59.39	-0.770853	0.623057	0.977205	1244	--	--	--	A0A1Q9DVZ2_SYMMI SubName: Full=Uncharacterized protein {ECO:0000313|EMBL:OLP99349.1};	--	--	--	--	--	--
Cluster-1527.75839	0.94	0.18	0.37	0.43	0.28	0.17	76.83	15.01	34.26	37.79	22.56	15.34	-0.770596	0.266656	0.899809	2612	--	--	--	A0A1Q9CX81_SYMMI SubName: Full=Putative sulfoquinovose importer {ECO:0000313|EMBL:OLP87540.1};	--	GO:0016021,integral component of membrane; GO:0005575,cellular_component; GO:0016020,membrane; GO:0031224,intrinsic component of membrane; GO:0044425,membrane part	MFS/sugar transport protein	--	--	--
Cluster-1527.22918	4.79	5.41	5.75	4.03	4.27	1.18	32	36	44	29	28	9	-0.769507	0.174427	0.841847	423	--	--	--	--	--	--	--	--	--	--
Cluster-1527.5608	17.37	17.82	33.55	14.15	14.21	12.11	66	67	149	58	53	53	-0.768435	0.052905	0.658854	338	--	--	--	--	--	--	--	--	--	--
Cluster-1527.43203	0.94	1.27	0.57	0	1.12	0.48	46.44	62.98	31.76	0	54.49	26.73	-0.768282	0.469075	0.95728	1666	--	hypothetical protein BE221DRAFT_79170 [Ostreococcus tauri]	--	R1BMW1_EMIHU SubName: Full=Uncharacterized protein {ECO:0000313|EMBL:EOD11318.1, ECO:0000313|EnsemblProtists:EOD11318};	--	--	YHYH protein	--	--	--
Cluster-1527.58054	1.26	1.46	1.1	0.87	1.02	0.38	107.26	124.92	104.91	79.03	84.82	36.22	-0.768197	0.0562568	0.672147	2699	--	--	--	A0A1Q9CLA0_SYMMI RecName: Full=Chloride channel protein {ECO:0000256|RuleBase:RU361221};	--	GO:0016021,integral component of membrane; GO:0016301,kinase activity; GO:0046872,metal ion binding; GO:0003950,NAD+ ADP-ribosyltransferase activity; GO:0005247,voltage-gated chloride channel activity; GO:0003674,molecular_function; GO:0003824,catalytic activity; GO:0016740,transferase activity; GO:0016772,transferase activity, transferring phosphorus-containing groups; GO:0005488,binding; GO:004…	--	--	--	--
Cluster-1527.1279	2.27	1.95	2.12	2	1.05	0.69	69.22	59.95	72.49	65.65	31.44	23.72	-0.76814	0.0874959	0.740279	1116	--	--	--	--	--	--	--	--	--	--
Cluster-1527.20787	8.94	18.78	12.06	13.97	0.71	8.75	438.03	926.86	662.29	735.98	34.2	485.71	-0.767769	0.456741	0.954323	1654	--	predicted protein [Micromonas commoda]	--	C1E185_MICCC SubName: Full=Uncharacterized protein {ECO:0000313|EMBL:ACO61694.1};	--	--	--	--	--	--
Cluster-1527.83297	7.44	6.46	7.14	2.49	3.79	5.76	36	31	40	13	18	32	-0.767579	0.148714	0.817122	369	--	nicotinamidase/pyrazinamidase domain-containing protein [Micromonas commoda]	--	A0A1Q9E446_SYMMI SubName: Full=Pyrazinamidase/nicotinamidase {ECO:0000313|EMBL:OLQ02197.1};	--	GO:0003824,catalytic activity; GO:0008152,metabolic process; GO:0003674,molecular_function; GO:0008150,biological_process	Isochorismatase family	--	--	--
Cluster-1527.29085	32.63	24.67	30.97	11.89	18.4	20.47	1660.66	1265.06	1766.44	650.67	920.6	1179.84	-0.767496	0.00396707	0.26842	1709	--	--	--	--	--	--	Domain of unknown function DUF29	--	--	--
Cluster-1527.82120	2.06	2.78	4.01	1.89	1.81	1.48	59	80	129	58	51	48	-0.767479	0.0387576	0.607522	1061	--	--	--	A0A1Q9EHS8_SYMMI SubName: Full=Aspartate aminotransferase {ECO:0000313|EMBL:OLQ06980.1};	--	GO:0016021,integral component of membrane; GO:0030170,pyridoxal phosphate binding; GO:0008483,transaminase activity; GO:0009058,biosynthetic process; GO:0003674,molecular_function; GO:0005488,binding; GO:0008144,drug binding; GO:0019842,vitamin binding; GO:0036094,small molecule binding; GO:0043167,ion binding; GO:0043168,anion binding; GO:0048037,cofactor binding; GO:0050662,coenzyme binding; GO…	--	--	--	--
Cluster-1527.78179	3.31	2.41	2.69	1.74	1.68	1.48	113.91	83.47	103.92	64.35	56.87	57.79	-0.766109	0.0100621	0.398791	1230	--	--	--	--	--	--	--	--	--	--
Cluster-1527.4543	1.67	1.12	1.75	1.6	0.43	0.66	40	27	47	41	10	18	-0.765938	0.198683	0.861657	924	--	--	--	--	--	--	PPR repeat	--	--	--
Cluster-1527.84223	1.09	0.92	2.29	1.21	0.71	0.62	53	45	125	63	34	34	-0.764988	0.118184	0.780737	1643	--	--	--	A0A1Q9EBJ1_SYMMI SubName: Full=Uncharacterized protein {ECO:0000313|EMBL:OLQ04796.1};	--	--	Protein of unknown function (DUF3431)	--	--	--
Cluster-1527.46027	3.49	2.15	2.43	1.85	2.06	0.83	110.29	68.21	86.28	62.61	63.91	29.77	-0.764295	0.0722169	0.708884	1147	--	--	--	A0A1Q9CAR4_SYMMI SubName: Full=2-oxoglutarate and iron-dependent oxygenase domain-containing protein 2 {ECO:0000313|EMBL:OLP79998.1};	--	GO:0016021,integral component of membrane; GO:0005506,iron ion binding; GO:0031418,L-ascorbic acid binding; GO:0016705,oxidoreductase activity, acting on paired donors, with incorporation or reduction of molecular oxygen; GO:0008270,zinc ion binding; GO:0003674,molecular_function; GO:0005488,binding; GO:0046872,metal ion binding; GO:0043167,ion binding; GO:0043169,cation binding; GO:0046914,trans…	--	--	--	--
Cluster-1527.36182	2.8	6.35	4.51	3.3	3.28	1.53	81.39	185.85	147.5	103.07	93.82	50.43	-0.763686	0.0728315	0.710488	1075	K15925 alpha-D-xyloside xylohydrolase [EC:3.2.1.177] | (RefSeq) alpha-xylosidase 1 (A)	alpha-xylosidase [Arabidopsis thaliana]	XYL1_ARATH RecName: Full=Alpha-xylosidase 1; EC=3.2.1.177; Flags: Precursor;	A0A0M0K593_9EUKA SubName: Full=Family 31 glycosyl hydrolase {ECO:0000313|EMBL:KOO34026.1};	Maltase glucoamylase and related hydrolases, glycosyl hydrolase family 31	GO:0048046,apoplast; GO:0005618,cell wall; GO:0009507,chloroplast; GO:0009505,plant-type cell wall; GO:0009506,plasmodesma; GO:0061634,alpha-D-xyloside xylohydrolase; GO:0046556,alpha-L-arabinofuranosidase activity; GO:0030246,carbohydrate binding; GO:0009044,xylan 1,4-beta-xylosidase activity; GO:0080176,xyloglucan 1,6-alpha-xylosidase activity; GO:0071555,cell wall organization; GO:0046686,resp…	Glycosyl hydrolases family 31	--	--	--
Cluster-1527.1005	1.02	0.78	0.55	2.62	2.95	12.27	13	10	8	36	37	178	2.991	4.94531e-05	0.0180892	600	K02885 large subunit ribosomal protein L19e | (RefSeq) 60S ribosomal protein L19-3-like (A)	predicted protein [Physcomitrella patens]	RL193_ARATH RecName: Full=60S ribosomal protein L19-3;	A9SIX1_PHYPA RecName: Full=Ribosomal protein L19 {ECO:0000256|RuleBase:RU000574};	60s ribosomal protein L19	GO:0005829,cytosol; GO:0022625,cytosolic large ribosomal subunit; GO:0022626,cytosolic ribosome; GO:0005886,plasma membrane; GO:0042788,polysomal ribosome; GO:0003723,RNA binding; GO:0003735,structural constituent of ribosome; GO:0006412,translation; GO:0003674,molecular_function; GO:0003676,nucleic acid binding; GO:0005488,binding; GO:0097159,organic cyclic compound binding; GO:1901363,heterocyc…	Ribosomal protein L19e	--	--	--
Cluster-1527.42000	3.3	5.31	6.02	3.06	2.88	2.61	61.33	98.98	125.99	60.99	52.63	54.93	-0.76208	0.0309088	0.572562	769	--	--	--	A0A1Q9EW08_SYMMI SubName: Full=Homeobox protein Wariai {ECO:0000313|EMBL:OLQ11610.1};	--	GO:0003677,DNA binding; GO:0003674,molecular_function; GO:0003676,nucleic acid binding; GO:0005488,binding; GO:0097159,organic cyclic compound binding; GO:1901363,heterocyclic compound binding	--	--	--	--
Cluster-1527.12081	2.64	3.8	2.84	1.65	1.7	2	32.46	46.8	39.53	21.8	20.52	27.99	-0.761943	0.0902826	0.744328	587	K10523 speckle-type POZ protein | (RefSeq) BTB/POZ and MATH domain-containing protein 1-like (A)	BTB/POZ and MATH domain-containing protein 1-like [Aegilops tauschii subsp. tauschii]	BT2_ARATH RecName: Full=BTB/POZ and TAZ domain-containing protein 2; AltName: Full=BTB and TAZ domain protein 2;	A0A1Q9E846_SYMMI SubName: Full=Polyubiquitin-B {ECO:0000313|EMBL:OLQ03581.1};	Proteins containing BTB/POZ and Kelch domains, involved in regulatory/signal transduction processes	GO:0005737,cytoplasm; GO:0005634,nucleus; GO:0019005,SCF ubiquitin ligase complex; GO:0005516,calmodulin binding; GO:0004402,histone acetyltransferase activity; GO:0003712,transcription coregulator activity; GO:0031625,ubiquitin protein ligase binding; GO:0008270,zinc ion binding; GO:0009738,abscisic acid-activated signaling pathway; GO:0009734,auxin-activated signaling pathway; GO:0007623,circad…	BTB/POZ domain	TRAF	TR	TRAF
Cluster-1527.17101	9.27	7.24	8.94	5.65	5.1	4.18	54.65	42.43	60.59	35.85	29.55	28.23	-0.761444	0.0472183	0.636435	400	--	--	--	--	--	--	--	--	--	--
Cluster-1527.61570	5.14	7.91	9.96	5.83	4.64	3.13	289.59	449.11	629.23	353.45	257.07	199.82	-0.761125	0.0139679	0.449366	1868	--	--	--	R1CW46_EMIHU SubName: Full=Uncharacterized protein {ECO:0000313|EMBL:EOD26907.1, ECO:0000313|EnsemblProtists:EOD26907};	--	GO:0003950,NAD+ ADP-ribosyltransferase activity; GO:0003674,molecular_function; GO:0003824,catalytic activity; GO:0016740,transferase activity; GO:0016757,transferase activity, transferring glycosyl groups; GO:0016763,transferase activity, transferring pentosyl groups	Centromere kinetochore component CENP-T N-terminus	--	--	--
Cluster-1527.18995	0.66	1.26	0.22	0.36	0.31	0.57	40.92	78.51	15.2	24.08	18.55	39.79	-0.761083	0.267501	0.90008	2022	--	--	--	--	--	--	Poly-adenylate binding protein, unique domain	--	--	--
Cluster-1527.51171	88.23	40.97	70.64	30.41	45.67	39.99	12637.3	5919.71	11315.9	4681.69	6432.5	6480.47	-0.759582	0.0109339	0.408217	4394	--	uncharacterized protein LOC111289175 [Durio zibethinus]	--	A0A089MX14_PENAM SubName: Full=rRNA intron-encoded homing endonuclease {ECO:0000313|EMBL:AIQ78384.1}; Flags: Fragment;	--	GO:0004519,endonuclease activity; GO:0003674,molecular_function; GO:0003824,catalytic activity; GO:0004518,nuclease activity; GO:0016787,hydrolase activity; GO:0016788,hydrolase activity, acting on ester bonds	--	--	--	--
Cluster-1527.41078	11.79	9.21	9.98	9.48	3.74	5.12	467.2	367.69	443.94	404.08	145.63	230.04	-0.75889	0.0212043	0.518813	1382	K22733 magnesium transporter | (RefSeq) probable magnesium transporter NIPA1 isoform X1 (A)	PREDICTED: probable magnesium transporter NIPA1 isoform X1 [Camelina sativa]	NIPA1_ARATH RecName: Full=Probable magnesium transporter NIPA1;	A0A1Q9CBX4_SYMMI SubName: Full=Myotrophin {ECO:0000313|EMBL:OLP80416.1};	Uncharacterized conserved protein	GO:0005769,early endosome; GO:0016021,integral component of membrane; GO:0016020,membrane; GO:0005886,plasma membrane; GO:0015095,magnesium ion transmembrane transporter activity; GO:0015693,magnesium ion transport; GO:0003674,molecular_function; GO:0046873,metal ion transmembrane transporter activity; GO:0005215,transporter activity; GO:0022857,transmembrane transporter activity; GO:0008324,cati…	Magnesium transporter NIPA	--	--	--
Cluster-1527.73001	0.74	6.54	0.12	0.85	3.62	0	12.52	110.73	2.24	15.49	60.13	0	-0.758569	0.718679	0.983948	720	--	--	--	--	--	--	--	--	--	--
Cluster-1527.5447	2.95	2.87	6.16	2.59	2.79	1.68	141	138	330	133	131	91	-0.758296	0.0454497	0.630571	1619	--	--	--	A0A1Q9DG62_SYMMI SubName: Full=ADP-ribosylation factor {ECO:0000313|EMBL:OLP94143.1};	--	GO:0016021,integral component of membrane; GO:0005622,intracellular; GO:0005509,calcium ion binding; GO:0005525,GTP binding; GO:0007264,small GTPase mediated signal transduction; GO:0003674,molecular_function; GO:0005488,binding; GO:0046872,metal ion binding; GO:0043167,ion binding; GO:0043169,cation binding; GO:0000166,nucleotide binding; GO:0001882,nucleoside binding; GO:0001883,purine nucleosi…	--	--	--	--
Cluster-1527.70144	8.35	9.68	7.8	5.21	5.27	4.66	58	67	62	39	36	37	-0.757476	0.0289023	0.563287	431	--	--	--	--	--	--	--	--	--	--
Cluster-1527.61470	2.08	1.59	4.76	1.84	1.34	1.75	66	51	170	63	42	63	-0.756052	0.114837	0.776768	1154	--	--	--	--	--	--	Glycolipid 2-alpha-mannosyltransferase	--	--	--
Cluster-1527.66789	1.55	2.17	1.75	0.83	1.22	1.16	62.9	88.89	79.5	36.12	48.68	53.18	-0.756026	0.0400593	0.612328	1410	--	--	--	--	--	--	--	--	--	--
Cluster-1527.54471	31.93	44.62	34.02	19.47	29.04	16.6	1301.8	1832.43	1555.94	853.44	1164.57	766.96	-0.75594	0.00309377	0.238917	1415	K13862 solute carrier family 4 (sodium borate transporter), member 11 | (RefSeq) putative sodium bicarbonate cotransporter (A)	anion exchanger family [Micromonas commoda]	BOR1_ARATH RecName: Full=Boron transporter 1;	C1E0U4_MICCC SubName: Full=Anion exchanger family {ECO:0000313|EMBL:ACO61617.1};	Na+-independent Cl/HCO3 exchanger AE1 and related transporters (SLC4 family)	GO:0005768,endosome; GO:0005887,integral component of plasma membrane; GO:0005773,vacuole; GO:0015301,anion:anion antiporter activity; GO:0005452,inorganic anion exchanger activity; GO:0051453,regulation of intracellular pH; GO:0010036,response to boron-containing substance; GO:0003674,molecular_function; GO:0005215,transporter activity; GO:0022857,transmembrane transporter activity; GO:0015291,s…	HCO3- transporter family	--	--	--
Cluster-1527.27281	6.1	6.67	5.78	3.63	3.45	3.79	151.18	166.29	161.16	96.73	84.12	106.45	-0.754782	0.00178342	0.173742	950	--	--	--	--	--	--	--	--	--	--
Cluster-1527.81831	3.35	3.65	4.72	2.81	2.25	1.87	221	243	349	199	146	140	-0.754709	0.00198209	0.182982	2148	K11323 histone arginine demethylase JMJD6 [EC:1.14.11.-] | (RefSeq) Clavaminate synthase-like protein (A)	hypothetical protein CHLRE_07g327150v5 [Chlamydomonas reinhardtii]	FB252_ARATH RecName: Full=F-box protein At5g06550;	F0WRN0_9STRA SubName: Full=Histone arginine demethylase putative {ECO:0000313|EMBL:CCA23994.1};	Uncharacterized conserved protein, contains JmjC domain	GO:0005634,nucleus; GO:0000987,proximal promoter sequence-specific DNA binding; GO:0043985,histone H4-R3 methylation; GO:0010030,positive regulation of seed germination; GO:0000976,transcription regulatory region sequence-specific DNA binding; GO:0001067,regulatory region nucleic acid binding; GO:0003674,molecular_function; GO:0003676,nucleic acid binding; GO:0003677,DNA binding; GO:0003690,doubl…	Cupin-like domain	Jumonji	TR	Jumonji
Cluster-1527.7437	27.02	26.63	41.17	20.45	18.35	17.65	66	64	120	54	44	50	-0.754616	0.0366606	0.598769	296	--	--	--	--	--	--	--	--	--	--
Cluster-1527.58149	10.34	9.47	14.71	7.27	7.21	5.86	551.11	508.53	878.63	416.48	377.85	353.79	-0.753867	0.000696123	0.0996353	1779	K07375 tubulin beta | (RefSeq) tubulin (A)	Tubulin beta chain [Auxenochlorella protothecoides]	TBB2_MAIZE RecName: Full=Tubulin beta-2 chain; AltName: Full=Beta-2-tubulin;	A0A1Q9DGL0_SYMMI SubName: Full=Tubulin beta chain {ECO:0000313|EMBL:OLP94318.1};	Beta tubulin	GO:0005737,cytoplasm; GO:0005874,microtubule; GO:0005525,GTP binding; GO:0003924,GTPase activity; GO:0005200,structural constituent of cytoskeleton; GO:0007017,microtubule-based process; GO:0000166,nucleotide binding; GO:0001882,nucleoside binding; GO:0001883,purine nucleoside binding; GO:0003674,molecular_function; GO:0005488,binding; GO:0017076,purine nucleotide binding; GO:0019001,guanyl nucle…	Tubulin/FtsZ family, GTPase domain	--	--	--
Cluster-1527.36378	5.34	6.47	9.46	5.37	4.16	3.08	380	464	754	411	291	248	-0.753815	0.00771005	0.363296	2298	K10401 kinesin family member 18/19 | (RefSeq) predicted protein (A)	predicted protein, partial [Micromonas commoda]	KN8B_ARATH RecName: Full=Kinesin-like protein KIN-8B {ECO:0000305};	F0YJE9_AURAN RecName: Full=Kinesin-like protein {ECO:0000256|RuleBase:RU000394}; Flags: Fragment;	Kinesin-like protein	GO:0005871,kinesin complex; GO:0005874,microtubule; GO:0005524,ATP binding; GO:0016887,ATPase activity; GO:0008017,microtubule binding; GO:0003777,microtubule motor activity; GO:0007019,microtubule depolymerization; GO:0007018,microtubule-based movement; GO:0000070,mitotic sister chromatid segregation; GO:0000166,nucleotide binding; GO:0003674,molecular_function; GO:0005488,binding; GO:0008144,dr…	Kinesin motor domain	--	--	--
Cluster-1527.11202	0.35	0.43	0.35	1.39	1.14	5.89	10	12.22	11.3	42.4	31.87	190	2.97915	4.7818e-05	0.017714	1057	K08770 ubiquitin C | (RefSeq) polyubiquitin-like (A)	polyubiquitin [Nicotiana tabacum]	UBIQP_ACEPE RecName: Full=Polyubiquitin; Contains: RecName: Full=Ubiquitin; Contains: RecName: Full=Ubiquitin-related 1; Contains: RecName: Full=Ubiquitin-related 2; Flags: Precursor; Fragment;	A0A1J3EI55_NOCCA SubName: Full=Polyubiquitin-G {ECO:0000313|EMBL:JAU29848.1}; Flags: Fragment;	Ubiquitin and ubiquitin-like proteins	GO:0005737,cytoplasm; GO:0005634,nucleus; GO:0005622,intracellular; GO:0005575,cellular_component; GO:0005623,cell; GO:0044424,intracellular part; GO:0044464,cell part; GO:0043231,intracellular membrane-bounded organelle; GO:0043226,organelle; GO:0043227,membrane-bounded organelle; GO:0043229,intracellular organelle	Ubiquitin family	--	--	--
Cluster-1527.47488	5.25	6.09	9.47	4.78	4.27	3.23	109.87	128.01	223.15	107.66	87.85	76.86	-0.753131	0.0208821	0.516754	838	--	--	--	--	--	--	--	--	--	--
Cluster-1527.86350	3	2.17	2.95	1.8	1.49	1.52	101.33	73.79	111.99	65.39	49.36	58.35	-0.752621	0.0142913	0.451976	1211	--	--	--	--	--	--	Ankyrin repeats (3 copies)	--	--	--
Cluster-1527.82489	38.97	36.67	40.63	28.38	28.72	12.87	94	87	117	74	68	36	-0.751529	0.0409738	0.615059	295	--	--	--	--	--	--	--	--	--	--
Cluster-1527.79312	2.68	2.11	3.97	1.74	1.78	1.63	87	69	145	61	57	60	-0.7515	0.0326212	0.581932	1175	K00786 beta-1,6-galactosyltransferase [EC:2.4.1.-] | (RefSeq) beta-1,6-galactosyltransferase GALT29A (A)	PREDICTED: CMP-N-acetylneuraminate-beta-galactosamide-alpha-2,3-sialyltransferase 1 [Cucumis sativus]	GT29A_ARATH RecName: Full=Beta-1,6-galactosyltransferase GALT29A {ECO:0000305}; EC=2.4.1.- {ECO:0000305}; AltName: Full=GT29 family galactosyltransferase 1 {ECO:0000305}; Short=AtGALT29A {ECO:0000303|PubMed:24693939}; AltName: Full=Sialyltransferase-like protein GT29A {ECO:0000305};	A0A0A0KDP9_CUCSA SubName: Full=Uncharacterized protein {ECO:0000313|EMBL:KGN46959.1};	Sialyltransferase	GO:0000139,Golgi membrane; GO:0016021,integral component of membrane; GO:0008378,galactosyltransferase activity; GO:0008373,sialyltransferase activity; GO:0009311,oligosaccharide metabolic process; GO:0018279,protein N-linked glycosylation via asparagine; GO:0097503,sialylation; GO:0003674,molecular_function; GO:0003824,catalytic activity; GO:0016740,transferase activity; GO:0016757,transferase a…	Glycosyltransferase family 29 (sialyltransferase)	--	--	--
Cluster-1527.45930	1.53	0.24	1.44	0	0	1.77	81.53	12.74	86.28	0	0	107.05	-0.7512	1	1	1781	--	--	--	--	--	--	--	--	--	--
Cluster-1527.20425	2.34	2.27	2.39	1.37	1.21	1.51	145.75	142.79	167.14	91.8	74.56	106.65	-0.750553	0.00278871	0.222485	2044	K20661 cytochrome P450 family 714 subfamily A1 | (RefSeq) cytochrome P450 714A1-like (A)	cytochrome P450 714A1-like [Durio zibethinus]	C14B3_MAIZE RecName: Full=Cytochrome P450 714B3; EC=1.14.-.-;	A0A1Q9CXB5_SYMMI SubName: Full=Cytochrome P450 714A1 {ECO:0000313|EMBL:OLP87572.1};	Cytochrome P450 CYP4/CYP19/CYP26 subfamilies	GO:0016021,integral component of membrane; GO:0020037,heme binding; GO:0005506,iron ion binding; GO:0004497,monooxygenase activity; GO:0016705,oxidoreductase activity, acting on paired donors, with incorporation or reduction of molecular oxygen; GO:0003674,molecular_function; GO:0005488,binding; GO:0046906,tetrapyrrole binding; GO:0048037,cofactor binding; GO:0097159,organic cyclic compound bindi…	Cytochrome P450	--	--	--
Cluster-1527.25517	6.48	7.72	6.86	5.7	4.64	2.27	151.71	181.63	180.54	143.55	106.74	60.22	-0.750461	0.0302994	0.569878	910	K04345 protein kinase A [EC:2.7.11.11] | (RefSeq) cAMP-dependent protein kinase catalytic subunit alpha-like (A)	isoform 2 of camp-dependent protein kinase catalytic subunit alpha [Quercus suber]	P2C19_ARATH RecName: Full=Protein phosphatase 2C and cyclic nucleotide-binding/kinase domain-containing protein; Includes: RecName: Full=Probable protein phosphatase 2C 19; Short=AtPP2C19; EC=3.1.3.16; Includes: RecName: Full=Probable inactive cyclic nucleotide-dependent protein kinase At2g20050;	A0A1Q9D788_SYMMI SubName: Full=cAMP-dependent protein kinase catalytic subunit PRKX {ECO:0000313|EMBL:OLP91054.1};	cAMP-dependent protein kinase catalytic subunit (PKA)	GO:0005886,plasma membrane; GO:0005524,ATP binding; GO:0046872,metal ion binding; GO:0004721,phosphoprotein phosphatase activity; GO:0004674,protein serine/threonine kinase activity; GO:0000166,nucleotide binding; GO:0003674,molecular_function; GO:0005488,binding; GO:0008144,drug binding; GO:0017076,purine nucleotide binding; GO:0030554,adenyl nucleotide binding; GO:0032553,ribonucleotide binding…	Protein kinase domain	--	--	--
Cluster-1527.57015	1.56	3.35	3.54	1.87	1.49	1.63	159.45	345.14	404.59	205.21	149.94	187.89	-0.750226	0.0271102	0.555436	3199	K02575 MFS transporter, NNP family, nitrate/nitrite transporter | (RefSeq) Nitrate transporter (A)	PREDICTED: high affinity nitrate transporter 2.5-like [Daucus carota subsp. sativus]	NRT24_ARATH RecName: Full=High affinity nitrate transporter 2.4; Short=AtNRT2:4;	A0A1X6NJS5_PORUM SubName: Full=Uncharacterized protein {ECO:0000313|EMBL:OSX68812.1};	--	GO:0016021,integral component of membrane; GO:0009705,plant-type vacuole membrane; GO:0005886,plasma membrane; GO:0015112,nitrate transmembrane transporter activity; GO:0071249,cellular response to nitrate; GO:0042128,nitrate assimilation; GO:0015706,nitrate transport; GO:0003674,molecular_function; GO:0005215,transporter activity; GO:0022857,transmembrane transporter activity; GO:0008509,anion t…	Major Facilitator Superfamily	--	--	--
Cluster-1527.15757	2.11	2.32	3.42	1.77	1.41	1.45	82	91	149	74	54	64	-0.75005	0.0213281	0.519231	1360	--	--	--	--	--	--	--	--	--	--
Cluster-1527.26986	13.99	19	23.29	11.49	14.12	7.79	425.27	580.91	795.04	375.42	422.08	268.36	-0.749843	0.00767293	0.363296	1113	--	--	--	--	--	--	Cytoskeletal adhesion	--	--	--
Cluster-1527.46150	11.55	13.67	11.01	7.4	6.46	7.44	292.72	348.28	313.6	201.5	160.83	213.72	-0.74968	0.000365993	0.0661061	966	--	--	--	--	--	--	--	--	--	--
Cluster-1527.61493	104.68	113.27	94.72	85.7	63.36	40.2	42	44	48	37	25	19	-0.749237	0.0844003	0.735636	211	--	--	--	--	--	--	--	--	--	--
Cluster-1527.22027	1.51	3	2.07	2.08	0.91	0.93	36.85	73.68	56.96	54.68	21.75	25.68	-0.749201	0.136295	0.804105	940	--	protein MEI2-like 6 [Phalaenopsis equestris]	--	A0A1Q9EQJ5_SYMMI SubName: Full=Protein MEI2-like 3 {ECO:0000313|EMBL:OLQ09692.1};	Protein Mei2, essential for commitment to meiosis, and related proteins	GO:0003723,RNA binding; GO:0003674,molecular_function; GO:0003676,nucleic acid binding; GO:0005488,binding; GO:0097159,organic cyclic compound binding; GO:1901363,heterocyclic compound binding	RNA recognition motif 2	--	--	--
Cluster-1527.82513	4.35	4.52	4.51	2.65	2.33	2.88	116	121	135	76	61	87	-0.748431	0.00532117	0.314192	1004	--	esterase CG5412-like [Brassica napus]	STR6_ARATH RecName: Full=Rhodanese-like domain-containing protein 6; AltName: Full=Sulfurtransferase 6; Short=AtStr6;	A0A1Q9EKT2_SYMMI SubName: Full=Rhodanese-like domain-containing protein 6 {ECO:0000313|EMBL:OLQ07997.1};	Phospholipase/carboxyhydrolase	--	Serine hydrolase (FSH1)	--	--	--
Cluster-1527.54478	2.87	3.22	4.53	2.28	2.11	1.9	108	122	191	92	78	81	-0.747444	0.010374	0.401822	1323	--	unknown protein [Bathycoccus prasinos]	--	R1F9K0_EMIHU SubName: Full=Uncharacterized protein {ECO:0000313|EMBL:EOD35660.1, ECO:0000313|EnsemblProtists:EOD04463};	--	--	--	--	--	--
Cluster-1527.78453	2.15	2.66	1.44	1.38	1.29	1.04	83.76	104.34	63.12	57.98	49.32	45.93	-0.747417	0.0428619	0.621016	1362	--	hypothetical protein SELMODRAFT_132594 [Selaginella moellendorffii]	--	R1DTC8_EMIHU SubName: Full=Uncharacterized protein {ECO:0000313|EMBL:EOD17760.1, ECO:0000313|EnsemblProtists:EOD17760};	--	--	Lactonase, 7-bladed beta-propeller	--	--	--
Cluster-1527.78485	0.31	1.44	1.1	0.56	0.17	0.95	16.66	78.52	66.78	32.48	9.27	58.04	-0.747309	0.31712	0.916683	1805	--	--	--	A0A1Q9CLP4_SYMMI SubName: Full=Activating signal cointegrator 1 complex subunit 3 {ECO:0000313|EMBL:OLP83838.1};	--	GO:0016021,integral component of membrane; GO:0005524,ATP binding; GO:0003676,nucleic acid binding; GO:0000166,nucleotide binding; GO:0003674,molecular_function; GO:0005488,binding; GO:0008144,drug binding; GO:0017076,purine nucleotide binding; GO:0030554,adenyl nucleotide binding; GO:0032553,ribonucleotide binding; GO:0032555,purine ribonucleotide binding; GO:0032559,adenyl ribonucleotide bindin…	--	--	--	--
Cluster-1527.50300	41.39	39.66	32.85	28.6	14.37	24.25	258	246	235	192	88	173	-0.745841	0.0136741	0.4452	410	K04345 protein kinase A [EC:2.7.11.11] | (RefSeq) cAMP-dependent protein kinase type 2-like (A)	PREDICTED: CBL-interacting serine/threonine-protein kinase 12-like [Cicer arietinum]	CIPKJ_ORYSJ RecName: Full=CBL-interacting protein kinase 19; EC=2.7.11.1; AltName: Full=OsCIPK19; AltName: Full=OsPK4;	A0A1Q9D788_SYMMI SubName: Full=cAMP-dependent protein kinase catalytic subunit PRKX {ECO:0000313|EMBL:OLP91054.1};	cAMP-dependent protein kinase catalytic subunit (PKA)	GO:0005622,intracellular; GO:0005524,ATP binding; GO:0004674,protein serine/threonine kinase activity; GO:0035556,intracellular signal transduction; GO:0018105,peptidyl-serine phosphorylation; GO:0018107,peptidyl-threonine phosphorylation; GO:0000166,nucleotide binding; GO:0003674,molecular_function; GO:0005488,binding; GO:0008144,drug binding; GO:0017076,purine nucleotide binding; GO:0030554,ade…	Protein kinase domain	--	--	--
Cluster-1527.28783	3.49	4.01	1.54	1.31	0.76	3.17	312.6	362.33	154.73	126.2	66.73	321.45	-0.745733	0.174637	0.841847	2832	K12385 Niemann-Pick C1 protein | (RefSeq) RND family transporter: Niemann-Pick type C1 disease protein-like protein (A)	Sterol-sensing domain [Ostreococcus tauri]	--	A0A1Q9D9Z4_SYMMI SubName: Full=Niemann-Pick C1 protein {ECO:0000313|EMBL:OLP92022.1}; Flags: Fragment;	Cholesterol transport protein (Niemann-Pick C disease protein)	GO:0016021,integral component of membrane; GO:0005524,ATP binding; GO:0004672,protein kinase activity; GO:0000166,nucleotide binding; GO:0003674,molecular_function; GO:0005488,binding; GO:0008144,drug binding; GO:0017076,purine nucleotide binding; GO:0030554,adenyl nucleotide binding; GO:0032553,ribonucleotide binding; GO:0032555,purine ribonucleotide binding; GO:0032559,adenyl ribonucleotide bin…	Patched family	--	--	--
Cluster-1527.64518	2.23	1.09	2.23	1.54	1.09	0.69	37.56	18.46	42.3	27.97	18.07	13.26	-0.745549	0.189455	0.854334	719	--	--	--	--	--	--	--	--	--	--
Cluster-1527.16345	3.09	2.19	2.23	1.71	1.76	1.02	59	42	48	35	33	22	-0.745394	0.0797191	0.727289	784	--	--	--	--	--	--	SAP domain	--	--	--
Cluster-1527.20790	1.27	0.07	2.19	0.96	0.48	0.64	39.06	2.18	75.74	31.79	14.51	22.17	-0.74504	0.421299	0.946657	1124	--	--	--	A0A1Q9EUC1_SYMMI SubName: Full=Retrovirus-related Pol polyprotein from type-1 retrotransposable element R2 {ECO:0000313|EMBL:OLQ11025.1};	--	GO:0003676,nucleic acid binding; GO:0036459,thiol-dependent ubiquitinyl hydrolase activity; GO:0016579,protein deubiquitination; GO:0003674,molecular_function; GO:0005488,binding; GO:0097159,organic cyclic compound binding; GO:1901363,heterocyclic compound binding; GO:0003824,catalytic activity; GO:0008234,cysteine-type peptidase activity; GO:0008233,peptidase activity; GO:0070011,peptidase activ…	RNA recognition motif. (a.k.a. RRM, RBD, or RNP domain)	--	--	--
Cluster-1527.15834	1.43	0.75	1.64	1.02	0.97	0.29	103.6	55.14	133.12	79.63	69.63	23.99	-0.745036	0.149723	0.819104	2342	K04424 sterile alpha motif and leucine zipper containing kinase AZK [EC:2.7.11.25] | (RefSeq) serine/threonine protein kinase (A)	uncharacterized protein LOC111303416 [Durio zibethinus]	CTR1_ARATH RecName: Full=Serine/threonine-protein kinase CTR1 {ECO:0000303|PubMed:8431946}; EC=2.7.11.1 {ECO:0000305}; AltName: Full=Protein CONSTITUTIVE TRIPLE RESPONSE1 {ECO:0000303|PubMed:8431946};	A0A1Q9DKQ9_SYMMI RecName: Full=Alpha-galactosidase {ECO:0000256|RuleBase:RU361168}; EC=3.2.1.22 {ECO:0000256|RuleBase:RU361168}; AltName: Full=Melibiase {ECO:0000256|RuleBase:RU361168};	Tyrosine kinase specific for activated (GTP-bound) p21cdc42Hs	GO:0005789,endoplasmic reticulum membrane; GO:0005524,ATP binding; GO:0004674,protein serine/threonine kinase activity; GO:0004712,protein serine/threonine/tyrosine kinase activity; GO:0004871,NA; GO:0071281,cellular response to iron ion; GO:0009873,ethylene-activated signaling pathway; GO:0009686,gibberellin biosynthetic process; GO:0010105,negative regulation of ethylene-activated signaling pat…	Protein kinase domain	--	--	--
Cluster-1527.21159	8.83	9.21	10.1	6.32	4.62	5.71	321	337	412	247	165	235	-0.744302	0.00028347	0.0558868	1286	--	--	--	A0A1Q9DL94_SYMMI SubName: Full=Uncharacterized protein {ECO:0000313|EMBL:OLP95942.1};	--	--	2OG-Fe(II) oxygenase superfamily	--	--	--
Cluster-1527.3947	1.85	1.91	1.72	0.91	1.41	0.93	72	75	75	38	54	41	-0.74424	0.0362341	0.597836	1362	K16281 RING-H2 zinc finger protein RHA1 | (RefSeq) E3 ubiquitin-protein ligase ATL4-like (A)	e3 ubiquitin-protein ligase atl4 [Quercus suber]	--	A0A200PN05_9MAGN SubName: Full=Zinc finger protein {ECO:0000313|EMBL:OUZ99567.1};	--	GO:0016021,integral component of membrane; GO:0005575,cellular_component; GO:0016020,membrane; GO:0031224,intrinsic component of membrane; GO:0044425,membrane part	Ring finger domain	--	--	--
Cluster-1527.73475	67.3	123.57	116.43	62.53	68.43	55	27	48	59	27	27	26	-0.744017	0.105987	0.768671	211	--	--	--	--	--	--	--	--	--	--
Cluster-1527.78554	0.98	1.51	1.62	0.91	0.44	1.06	56.36	87.69	105.06	56.72	24.98	69.16	-0.743026	0.0982368	0.755883	1910	--	--	--	--	--	--	--	--	--	--
Cluster-1527.10090	73.47	71.2	87.51	51.63	43.18	45	71	67	105	54	41	51	-0.742748	0.0242805	0.53735	242	--	--	--	A0A1Q9C594_SYMMI SubName: Full=Protein OSCP1 {ECO:0000313|EMBL:OLP78090.1};	--	--	--	--	--	--
Cluster-1527.25748	1.89	3.52	2.4	1.94	1.96	0.78	126.86	238.35	180.41	139.96	129.57	59.52	-0.742358	0.0668752	0.696155	2182	--	--	--	A0A1Q9CLA0_SYMMI RecName: Full=Chloride channel protein {ECO:0000256|RuleBase:RU361221};	--	GO:0016021,integral component of membrane; GO:0016301,kinase activity; GO:0046872,metal ion binding; GO:0003950,NAD+ ADP-ribosyltransferase activity; GO:0005247,voltage-gated chloride channel activity; GO:0003674,molecular_function; GO:0003824,catalytic activity; GO:0016740,transferase activity; GO:0016772,transferase activity, transferring phosphorus-containing groups; GO:0005488,binding; GO:004…	--	--	--	--
Cluster-1527.27866	2.6	2.72	2.45	2.09	0.92	1.58	60.7	63.71	64.25	52.57	21.15	41.76	-0.742263	0.0745237	0.715349	908	--	--	--	--	--	--	--	--	--	--
Cluster-1527.70859	2.76	2.99	6.8	2.7	3.1	1.67	90.09	98.39	249.54	94.85	99.66	61.76	-0.741542	0.0902494	0.744328	1179	--	--	--	A0A1Q9CMX5_SYMMI SubName: Full=Uncharacterized protein {ECO:0000313|EMBL:OLP84274.1};	--	--	--	--	--	--
Cluster-1527.23917	0.72	1.23	2.59	1.47	0.72	0.54	24.36	41.9	98.21	53.42	23.98	20.6	-0.741434	0.224986	0.87938	1210	--	--	--	A0A1Q9DG99_SYMMI RecName: Full=Poly [ADP-ribose] polymerase {ECO:0000256|RuleBase:RU362114}; Short=PARP {ECO:0000256|RuleBase:RU362114}; EC=2.4.2.30 {ECO:0000256|RuleBase:RU362114};	--	GO:0016021,integral component of membrane; GO:0003950,NAD+ ADP-ribosyltransferase activity; GO:0003674,molecular_function; GO:0003824,catalytic activity; GO:0016740,transferase activity; GO:0016757,transferase activity, transferring glycosyl groups; GO:0016763,transferase activity, transferring pentosyl groups; GO:0005575,cellular_component; GO:0016020,membrane; GO:0031224,intrinsic component of …	Poly(ADP-ribose) polymerase catalytic domain	--	--	--
Cluster-1527.13885	121.01	143.76	107.97	80.03	74.58	68.12	109	126	121	78	66	72	-0.739836	0.00499912	0.307671	239	--	--	--	--	--	--	--	--	--	--
Cluster-1527.23197	14.32	14.9	14.65	8.92	6.84	10.12	64	66	76	43	30	52	-0.739452	0.0379307	0.602911	358	--	--	--	--	--	--	--	--	--	--
Cluster-1527.13977	1.52	1.56	3.5	1.79	1.21	0.94	64	66	165	81	50	45	-0.738723	0.102424	0.761944	1452	--	--	--	--	--	--	--	--	--	--
Cluster-1527.83226	1.61	1.5	3.43	1.98	1.06	0.9	98	92	233	129	63	62	-0.738546	0.0957183	0.750219	1995	--	--	--	A0A1Q9DWU5_SYMMI SubName: Full=Uncharacterized protein {ECO:0000313|EMBL:OLP99653.1};	--	--	--	--	--	--
Cluster-1527.18756	31.33	28.89	31.23	22.83	18.23	13.82	140	128	162	110	80	71	-0.738155	0.00592475	0.330377	358	K03320 ammonium transporter, Amt family | (RefSeq) ammonium transporter (A)	ammonium transporter [Bathycoccus prasinos]	AMT14_ARATH RecName: Full=Ammonium transporter 1 member 4; Short=AtAMT1;4;	A0A0K2STH0_ALETA RecName: Full=Ammonium transporter {ECO:0000256|RuleBase:RU362002};	Ammonia permease	GO:0005887,integral component of plasma membrane; GO:0005886,plasma membrane; GO:0009506,plasmodesma; GO:0008519,ammonium transmembrane transporter activity; GO:0015398,high-affinity secondary active ammonium transmembrane transporter activity; GO:0072488,ammonium transmembrane transport; GO:0015695,organic cation transport; GO:0003674,molecular_function; GO:0005215,transporter activity; GO:00228…	Ammonium Transporter Family	--	--	--
Cluster-1527.21826	3.49	6.48	4.68	3.38	3.89	1.56	260.52	487.84	390.78	271.4	285.78	131.63	-0.737674	0.0449708	0.628355	2400	--	hypothetical protein SELMODRAFT_411925 [Selaginella moellendorffii]	--	A0A1Q9CTL2_SYMMI RecName: Full=Poly [ADP-ribose] polymerase {ECO:0000256|RuleBase:RU362114}; Short=PARP {ECO:0000256|RuleBase:RU362114}; EC=2.4.2.30 {ECO:0000256|RuleBase:RU362114}; EC=3.2.1.- {ECO:0000256|RuleBase:RU000489};	Ankyrin	GO:0005576,extracellular region; GO:0016021,integral component of membrane; GO:0008061,chitin binding; GO:0020037,heme binding; GO:0004553,hydrolase activity, hydrolyzing O-glycosyl compounds; GO:0046872,metal ion binding; GO:0003950,NAD+ ADP-ribosyltransferase activity; GO:0016491,oxidoreductase activity; GO:0031625,ubiquitin protein ligase binding; GO:0005975,carbohydrate metabolic process; GO:…	Poly(ADP-ribose) polymerase catalytic domain	--	--	--
Cluster-1527.41675	27.55	23.92	27.92	19.34	11.44	16.67	54	46	66	41	22	38	-0.737602	0.0652596	0.693238	280	--	--	--	--	--	--	--	--	--	--
Cluster-1527.80842	9.05	6.22	8.27	4.32	4.69	4.91	148.94	102.78	153.53	76.57	75.83	91.82	-0.737044	0.0101001	0.398791	708	--	--	--	--	--	--	--	--	--	--
Cluster-1527.45151	26.57	37.88	38.28	21.18	25.17	15.9	43	60	75.39	37.11	39.99	30	-0.73438	0.0630704	0.68641	268	--	--	--	--	--	--	--	--	--	--
Cluster-1527.70530	13.63	10.68	12.76	10.81	4.76	6.72	35	27	39	30	12	20	-0.734341	0.152525	0.821197	300	--	--	--	--	--	--	--	--	--	--
Cluster-1527.50232	0.96	1.84	1.93	1.26	0.54	1.01	116.48	225.21	262.35	164.55	64.64	139.05	-0.734173	0.0683583	0.701648	3756	K11971 E3 ubiquitin-protein ligase RNF14 [EC:2.3.2.31] | (RefSeq) E3 ubiquitin-protein ligase RNF14-like isoform X1 (A)	hypothetical protein CHLRE_01g018900v5 [Chlamydomonas reinhardtii]	ARI9_ARATH RecName: Full=Probable E3 ubiquitin-protein ligase ARI9; EC=2.3.2.27 {ECO:0000250|UniProtKB:Q9Y4X5}; AltName: Full=ARIADNE-like protein ARI9; AltName: Full=Protein ariadne homolog 9; AltName: Full=RING-type E3 ubiquitin transferase ARI9 {ECO:0000305};	W7TSR3_9STRA RecName: Full=RING-type E3 ubiquitin transferase {ECO:0000256|SAAS:SAAS00970528}; EC=2.3.2.27 {ECO:0000256|SAAS:SAAS00970528};	Predicted E3 ubiquitin ligase	GO:0005737,cytoplasm; GO:0000151,ubiquitin ligase complex; GO:0046872,metal ion binding; GO:0031624,ubiquitin conjugating enzyme binding; GO:0061630,ubiquitin protein ligase activity; GO:0032436,positive regulation of proteasomal ubiquitin-dependent protein catabolic process; GO:0000209,protein polyubiquitination; GO:0042787,NA; GO:0003674,molecular_function; GO:0005488,binding; GO:0043167,ion bi…	IBR domain, a half RING-finger domain	--	--	--
Cluster-1527.5025	3.61	3.81	8.54	3.61	3.23	2.69	143	152	380	154	126	121	-0.733722	0.052533	0.658332	1382	K01193 beta-fructofuranosidase [EC:3.2.1.26] | (RefSeq) hypothetical protein (A)	hypothetical protein EUTSA_v10013192mg [Eutrema salsugineum]	INV6_ARATH RecName: Full=Beta-fructofuranosidase, insoluble isoenzyme CWINV6; AltName: Full=6 and 1-fructan exohydrolase; Short=6&1-FEH; EC=3.2.1.80; AltName: Full=Cell wall beta-fructosidase 6; AltName: Full=Cell wall invertase 6; Short=AtcwINV6; AltName: Full=Sucrose hydrolase 6; Flags: Precursor;	F0Y918_AURAN SubName: Full=Uncharacterized protein {ECO:0000313|EMBL:EGB08417.1};	Beta-fructofuranosidase (invertase)	GO:0048046,apoplast; GO:0005618,cell wall; GO:0051669,fructan beta-fructosidase activity; GO:0005975,carbohydrate metabolic process; GO:0003674,molecular_function; GO:0003824,catalytic activity; GO:0004553,hydrolase activity, hydrolyzing O-glycosyl compounds; GO:0016787,hydrolase activity; GO:0016798,hydrolase activity, acting on glycosyl bonds; GO:0008152,metabolic process; GO:0008150,biological…	Glycosyl hydrolases family 32 C terminal	--	--	--
Cluster-1527.32705	0.86	0.67	0.55	0.99	0	0.27	35.77	28.42	25.8	44.71	0	12.71	-0.733401	0.492618	0.960399	1445	--	--	--	A0A1Q9CIR1_SYMMI SubName: Full=Uncharacterized protein {ECO:0000313|EMBL:OLP82796.1};	--	GO:0016021,integral component of membrane; GO:0005575,cellular_component; GO:0016020,membrane; GO:0031224,intrinsic component of membrane; GO:0044425,membrane part	--	--	--	--
Cluster-1527.68169	4.58	7.04	4.54	1.95	4.13	3.53	35.61	54.6	40.25	16.29	31.5	31.31	-0.733238	0.147764	0.816333	455	--	--	--	--	--	--	--	--	--	--
Cluster-1527.82054	1.02	1.5	3	1.65	0.85	0.83	39	58	129	68	32	36	-0.733089	0.157206	0.826799	1344	--	hypothetical protein COCSUDRAFT_48268 [Coccomyxa subellipsoidea C-169]	--	A0A1E7FJX3_9STRA SubName: Full=Uncharacterized protein {ECO:0000313|EMBL:OEU18489.1};	--	GO:0016757,transferase activity, transferring glycosyl groups; GO:0006486,protein glycosylation; GO:0003674,molecular_function; GO:0003824,catalytic activity; GO:0016740,transferase activity; GO:0008152,metabolic process; GO:0006464,cellular protein modification process; GO:0006807,nitrogen compound metabolic process; GO:0008150,biological_process; GO:0009058,biosynthetic process; GO:0009059,macr…	Exostosin family	--	--	--
Cluster-1527.84039	4.78	4.59	6.9	3.28	3.12	3.29	145	140	235	107	93	113	-0.732834	0.00754209	0.361921	1111	K20893 probable galacturonosyltransferase-like 1 [EC:2.4.1.-] | (RefSeq) probable galacturonosyltransferase-like 2 (A)	PREDICTED: probable galacturonosyltransferase-like 10 [Erythranthe guttata]	GATL9_ARATH RecName: Full=Probable galacturonosyltransferase-like 9; EC=2.4.1.-; AltName: Full=Like glycosyl transferase 8;	A0A1Q9D498_SYMMI SubName: Full=Glycosyltransferase 8 domain-containing protein 1 {ECO:0000313|EMBL:OLP89964.1};	--	GO:0005794,Golgi apparatus; GO:0000139,Golgi membrane; GO:0016021,integral component of membrane; GO:0047262,polygalacturonate 4-alpha-galacturonosyltransferase activity; GO:0016757,transferase activity, transferring glycosyl groups; GO:0071555,cell wall organization; GO:0045489,pectin biosynthetic process; GO:0000271,polysaccharide biosynthetic process; GO:0003674,molecular_function; GO:0003824,…	Glycosyl transferase family 8	--	--	--
Cluster-1527.59611	45.74	54.87	50.83	35.16	34.03	21.87	847.31	1020.71	1061.35	700.54	619.85	460.06	-0.732175	0.000396958	0.0681034	768	--	--	--	--	--	--	--	--	--	--
Cluster-1527.56417	1.93	2.22	0.86	0.97	1.39	0.68	83.8	96.71	41.65	44.97	59.38	33.19	-0.732004	0.134157	0.799548	1489	--	--	--	--	--	--	SH3 terminal domain of 2nd SH3 on Neutrophil cytosol factor 1	--	--	--
Cluster-1527.77066	3.15	1.8	2.75	9.32	9.91	38.23	21	12	21	67	65	292	2.96464	4.7575e-06	0.00401009	423	K02976 small subunit ribosomal protein S26e | (RefSeq) hypothetical protein (A)	hypothetical protein AXG93_4542s1550 [Marchantia polymorpha subsp. ruderalis]	RS26_ORYSJ RecName: Full=40S ribosomal protein S26; AltName: Full=S31;	A0A1J3FE52_NOCCA RecName: Full=40S ribosomal protein S26 {ECO:0000256|RuleBase:RU363128}; Flags: Fragment;	40s ribosomal protein S26	GO:0022627,cytosolic small ribosomal subunit; GO:0003729,mRNA binding; GO:0003735,structural constituent of ribosome; GO:0006412,translation; GO:0003674,molecular_function; GO:0003676,nucleic acid binding; GO:0003723,RNA binding; GO:0005488,binding; GO:0097159,organic cyclic compound binding; GO:1901363,heterocyclic compound binding; GO:0005198,structural molecule activity; GO:0008152,metabolic p…	Ribosomal protein S26e	--	--	--
Cluster-1527.21918	8.75	6.61	9.04	5.24	3.74	5.52	285.58	217	331	183.8	120	204.08	-0.731723	0.00541921	0.317084	1178	--	BnaC05g48300D [Brassica napus]	--	A0A1Q9DZ35_SYMMI SubName: Full=Kelch-like protein 5 {ECO:0000313|EMBL:OLQ00399.1};	--	GO:0016021,integral component of membrane; GO:0005575,cellular_component; GO:0016020,membrane; GO:0031224,intrinsic component of membrane; GO:0044425,membrane part	FHA domain	--	--	--
Cluster-1527.6768	1.16	2.17	5.63	2.74	1.67	1.02	43	81	234	109	61	43	-0.730503	0.216344	0.87333	1307	--	--	--	A0A1Q9CP55_SYMMI SubName: Full=Uncharacterized protein C12orf4-like {ECO:0000313|EMBL:OLP84708.1};	--	--	Uncharacterized conserved protein (DUF2362)	--	--	--
Cluster-1527.16761	4.08	3.02	4.24	3.08	2.4	1.37	176.16	131.15	205.19	143.1	101.65	66.99	-0.729932	0.0286041	0.562918	1484	--	--	--	--	--	--	Double zinc ribbon	--	--	--
Cluster-1527.42088	4.94	4.52	8.78	4.79	3.49	2.71	308	284	613	321	214	191	-0.729916	0.0229947	0.530994	2042	--	--	--	A0A1Q9F7G7_SYMMI SubName: Full=Alpha-1,3-mannosyl-glycoprotein 4-beta-N-acetylglucosaminyltransferase C {ECO:0000313|EMBL:OLQ15628.1};	--	GO:0016020,membrane; GO:0016758,transferase activity, transferring hexosyl groups; GO:0005975,carbohydrate metabolic process; GO:0003674,molecular_function; GO:0003824,catalytic activity; GO:0016740,transferase activity; GO:0016757,transferase activity, transferring glycosyl groups; GO:0008152,metabolic process; GO:0008150,biological_process; GO:0044238,primary metabolic process; GO:0071704,organ…	N-Acetylglucosaminyltransferase-IV (GnT-IV) conserved region	--	--	--
Cluster-1527.6038	1.73	1.48	2.46	1.53	1.05	0.84	42	36	67	40	25	23	-0.72972	0.103055	0.762691	934	--	--	--	A0A1Q9ET75_SYMMI SubName: Full=Alkaline ceramidase 3 {ECO:0000313|EMBL:OLQ10614.1};	--	GO:0016021,integral component of membrane; GO:0016811,hydrolase activity, acting on carbon-nitrogen (but not peptide) bonds, in linear amides; GO:0006672,ceramide metabolic process; GO:0003674,molecular_function; GO:0003824,catalytic activity; GO:0016787,hydrolase activity; GO:0016810,hydrolase activity, acting on carbon-nitrogen (but not peptide) bonds; GO:0008152,metabolic process; GO:0006629,l…	--	--	--	--
Cluster-1527.71572	9.67	9.5	13.2	8.18	4.95	6.23	85.45	83.84	132.77	77.81	43	62.75	-0.729697	0.0307704	0.571913	486	--	--	--	--	--	--	--	--	--	--
Cluster-1527.16866	1.33	1.19	1	0.58	0.63	0.88	43.84	39.76	37.11	20.46	20.56	32.94	-0.728205	0.113689	0.775805	1191	K20535 mitogen-activated protein kinase 1/2 [EC:2.7.11.24] | (RefSeq) MPK1; hypothetical protein (A)	mitogen-activated protein kinase [Dunaliella salina]	MPK3_ARATH RecName: Full=Mitogen-activated protein kinase 3; Short=AtMPK3; Short=MAP kinase 3; EC=2.7.11.24;	A0A1Q9DRY9_SYMMI RecName: Full=Mitogen-activated protein kinase {ECO:0000256|RuleBase:RU361165, ECO:0000256|SAAS:SAAS00652812}; EC=2.7.11.24 {ECO:0000256|RuleBase:RU361165, ECO:0000256|SAAS:SAAS00652812};	Mitogen-activated protein kinase	GO:0005737,cytoplasm; GO:0005634,nucleus; GO:0005524,ATP binding; GO:0004707,MAP kinase activity; GO:0004672,protein kinase activity; GO:0009738,abscisic acid-activated signaling pathway; GO:0010120,camalexin biosynthetic process; GO:0042742,defense response to bacterium; GO:0050832,defense response to fungus; GO:0010229,inflorescence development; GO:0048481,plant ovule development; GO:0009626,pl…	Protein kinase domain	--	--	--
Cluster-1527.51720	6.49	7.49	11.54	8.28	7.07	0.42	170.92	198.46	341.5	234.32	183.14	12.42	-0.728048	0.476827	0.958387	995	--	--	--	A0A1Q9DXZ4_SYMMI SubName: Full=Putative cardiolipin-specific deacylase, mitochondrial {ECO:0000313|EMBL:OLQ00043.1};	--	GO:0016021,integral component of membrane; GO:0005575,cellular_component; GO:0016020,membrane; GO:0031224,intrinsic component of membrane; GO:0044425,membrane part	--	--	--	--
Cluster-1527.31818	3.16	2.65	2.01	1.18	1.48	1.98	142.23	120.28	101.73	57.06	65.49	101.08	-0.727892	0.0434149	0.623339	1539	K17579 protein phosphatase 1 regulatory subunit 42 | (RefSeq) hypothetical protein (A)	PREDICTED: protein terminal ear1-like [Phoenix dactylifera]	TE1_MAIZE RecName: Full=Protein terminal ear1;	A0A1Q9DG42_SYMMI SubName: Full=Protein MEI2-like 4 {ECO:0000313|EMBL:OLP94119.1};	Protein Mei2, essential for commitment to meiosis, and related proteins	GO:0003723,RNA binding; GO:0007275,multicellular organism development; GO:0003674,molecular_function; GO:0003676,nucleic acid binding; GO:0005488,binding; GO:0097159,organic cyclic compound binding; GO:1901363,heterocyclic compound binding; GO:0008150,biological_process; GO:0032501,multicellular organismal process; GO:0032502,developmental process; GO:0048856,anatomical structure development	RNA recognition motif 2	--	--	--
Cluster-1527.50335	0.36	1.11	0	0.12	0.77	0	46.38	144.48	0	16.92	97.71	0	-0.725358	0.792962	0.987931	3992	--	--	--	A0A1Q9EAR8_SYMMI SubName: Full=Voltage-dependent calcium channel type A subunit alpha-1 {ECO:0000313|EMBL:OLQ04501.1};	--	GO:0016021,integral component of membrane; GO:0005509,calcium ion binding; GO:0005216,ion channel activity; GO:0003674,molecular_function; GO:0005488,binding; GO:0046872,metal ion binding; GO:0043167,ion binding; GO:0043169,cation binding; GO:0005215,transporter activity; GO:0022857,transmembrane transporter activity; GO:0015075,ion transmembrane transporter activity; GO:0015267,channel activity;…	--	--	--	--
Cluster-1527.52371	7.16	11.28	9.79	4.48	6.35	6	367	582.41	561.95	246.71	320.16	347.87	-0.725337	0.00678331	0.3485	1719	--	PREDICTED: uncharacterized protein LOC103718263 [Phoenix dactylifera]	--	A0A1Q9EUE8_SYMMI SubName: Full=Inter-alpha-trypsin inhibitor heavy chain H4 {ECO:0000313|EMBL:OLQ11054.1};	--	--	von Willebrand factor type A domain	--	--	--
Cluster-1527.82113	2.46	1.77	4.9	3.07	1.89	0.65	100.74	73	224.87	135.02	75.81	30.12	-0.725225	0.197833	0.861657	1418	--	--	--	A0A1Q9DAQ8_SYMMI SubName: Full=Lys-63-specific deubiquitinase BRCC36 {ECO:0000313|EMBL:OLP92276.1};	--	--	--	--	--	--
Cluster-1527.56690	7.64	12.96	7.13	6.9	7.16	2.8	38	64	41	37	35	16	-0.725056	0.158617	0.828292	373	--	--	--	A0A1Q9CHA5_SYMMI SubName: Full=Uncharacterized protein {ECO:0000313|EMBL:OLP82300.1};	--	--	--	--	--	--
Cluster-1527.82916	0	2.4	1.03	1.37	0	0.75	0	104.44	49.69	63.47	0	36.47	-0.725039	0.777314	0.987785	1484	--	--	--	A0A1Q9EYZ9_SYMMI SubName: Full=Putative serine/threonine-protein kinase 2 {ECO:0000313|EMBL:OLQ12605.1};	--	GO:0005524,ATP binding; GO:0004672,protein kinase activity; GO:0000166,nucleotide binding; GO:0003674,molecular_function; GO:0005488,binding; GO:0008144,drug binding; GO:0017076,purine nucleotide binding; GO:0030554,adenyl nucleotide binding; GO:0032553,ribonucleotide binding; GO:0032555,purine ribonucleotide binding; GO:0032559,adenyl ribonucleotide binding; GO:0035639,purine ribonucleoside trip…	Ankyrin repeats (many copies)	--	--	--
Cluster-1527.66378	3.37	3.46	5.7	2.85	2.49	2.2	204	211	386	185	148	151	-0.72435	0.00971386	0.395352	1988	--	--	--	A0A1Q9DWU3_SYMMI SubName: Full=Putative ATP-dependent DNA helicase CHR12 {ECO:0000313|EMBL:OLP99654.1};	--	GO:0005524,ATP binding; GO:0004386,helicase activity; GO:0000166,nucleotide binding; GO:0003674,molecular_function; GO:0005488,binding; GO:0008144,drug binding; GO:0017076,purine nucleotide binding; GO:0030554,adenyl nucleotide binding; GO:0032553,ribonucleotide binding; GO:0032555,purine ribonucleotide binding; GO:0032559,adenyl ribonucleotide binding; GO:0035639,purine ribonucleoside triphospha…	Leucine Rich repeat	--	--	--
Cluster-1527.45338	3.91	9.78	10.73	4.73	5.36	4.53	25.85	64.34	81.26	33.68	34.82	34.24	-0.724254	0.141274	0.809244	421	--	--	--	--	--	--	--	--	--	--
Cluster-1527.4103	2.35	1.86	3.42	1.96	1.23	1.4	68	54	111	61	35	46	-0.722713	0.065412	0.693847	1069	--	--	--	A0A1Q9D5P4_SYMMI SubName: Full=Maternal protein pumilio {ECO:0000313|EMBL:OLP90488.1};	--	GO:0003723,RNA binding; GO:0003674,molecular_function; GO:0003676,nucleic acid binding; GO:0005488,binding; GO:0097159,organic cyclic compound binding; GO:1901363,heterocyclic compound binding	--	--	--	--
Cluster-1527.60067	7.86	11.15	8.81	6.09	5.02	5.65	57.58	81.4	73.74	48.06	36.12	47.32	-0.722346	0.0363114	0.5985	442	--	--	--	--	--	--	--	--	--	--
Cluster-1527.83794	2.08	2.43	2.91	1.52	1.76	1.2	61	72	96	48	51	40	-0.721114	0.0364581	0.598769	1084	K01802 peptidylprolyl isomerase [EC:5.2.1.8] | (RefSeq) peptidyl-prolyl cis-trans isomerase (A)	peptidyl-prolyl cis-trans isomerase [Arachis ipaensis]	CYPH_CATRO RecName: Full=Peptidyl-prolyl cis-trans isomerase; Short=PPIase; EC=5.2.1.8; AltName: Full=Cyclophilin; AltName: Full=Cyclosporin A-binding protein; AltName: Full=Rotamase;	A0A1Q9CP71_SYMMI RecName: Full=Peptidylprolyl isomerase {ECO:0000256|PROSITE-ProRule:PRU00277}; EC=5.2.1.8 {ECO:0000256|PROSITE-ProRule:PRU00277};	Cyclophilin type peptidyl-prolyl cis-trans isomerase	GO:0005737,cytoplasm; GO:0003755,peptidyl-prolyl cis-trans isomerase activity; GO:0006457,protein folding; GO:0003674,molecular_function; GO:0003824,catalytic activity; GO:0016853,isomerase activity; GO:0016859,cis-trans isomerase activity; GO:0140096,catalytic activity, acting on a protein; GO:0008150,biological_process; GO:0009987,cellular process; GO:0005622,intracellular; GO:0005575,cellular_…	Cyclophilin type peptidyl-prolyl cis-trans isomerase/CLD	--	--	--
Cluster-1527.65111	0.74	1.58	3.22	0.69	1.68	0.93	95.92	207.05	467.53	96.61	214.63	136.55	-0.720949	0.172485	0.839263	4006	K00381 sulfite reductase (NADPH) hemoprotein beta-component [EC:1.8.1.2] | (RefSeq) sulfite reductase [NADPH] subunit beta-like (A)	pyruvate-ferredoxin oxidoreductase [Volvox carteri f. nagariensis]	PNO_EUGGR RecName: Full=Pyruvate dehydrogenase [NADP(+)], mitochondrial; EC=1.16.1.5 {ECO:0000269|PubMed:8373179}; EC=1.2.1.51 {ECO:0000269|PubMed:3110154}; AltName: Full=Aquacobalamin reductase [NADPH]; AltName: Full=EgPNOmt; AltName: Full=Pyruvate:NADP(+) oxidoreductase; Flags: Precursor;	A0A1Q9E245_SYMMI SubName: Full=Pyruvate dehydrogenase [NADP(+)] {ECO:0000313|EMBL:OLQ01481.1};	Sulfite reductase (ferredoxin)	GO:0005739,mitochondrion; GO:0051539,4 iron, 4 sulfur cluster binding; GO:0050444,aquacobalamin reductase (NADPH) activity; GO:0010181,FMN binding; GO:0005506,iron ion binding; GO:0016491,oxidoreductase activity; GO:0050243,pyruvate dehydrogenase (NADP+) activity; GO:0030976,thiamine pyrophosphate binding; GO:0045333,cellular respiration; GO:0022900,electron transport chain; GO:0006090,pyruvate m…	FAD binding domain	--	--	--
Cluster-1527.876	1.39	2.26	2.06	1.51	1.41	0.57	30	49	50	35	30	14	-0.719585	0.162087	0.831047	857	--	--	--	--	--	--	--	--	--	--
Cluster-1527.25662	2.31	2.38	1.76	2.07	0.96	0.92	46.11	47.72	39.67	44.49	18.81	20.96	-0.718985	0.134107	0.799548	810	--	--	--	A0A1Q9CLA0_SYMMI RecName: Full=Chloride channel protein {ECO:0000256|RuleBase:RU361221};	--	GO:0016021,integral component of membrane; GO:0016301,kinase activity; GO:0046872,metal ion binding; GO:0003950,NAD+ ADP-ribosyltransferase activity; GO:0005247,voltage-gated chloride channel activity; GO:0003674,molecular_function; GO:0003824,catalytic activity; GO:0016740,transferase activity; GO:0016772,transferase activity, transferring phosphorus-containing groups; GO:0005488,binding; GO:004…	--	--	--	--
Cluster-1527.6992	6.65	6.46	6.68	3.95	6.02	2.11	72	70	82	46	64	26	-0.717593	0.0965275	0.751243	544	--	--	--	--	--	--	Nucleoside transporter	--	--	--
Cluster-1527.19427	5.32	6.89	5.91	4.39	3.57	3.03	330.6	431.36	411.57	293.55	218.4	213.36	-0.717531	0.000715313	0.100977	2036	--	--	--	--	--	--	Tetratricopeptide repeat	--	--	--
Cluster-1527.27166	2.72	4.36	1.06	2.46	0.99	1.55	276.13	445.7	119.77	267.47	98.28	177.27	-0.716185	0.155355	0.825203	3176	--	--	--	A0A1Q9E425_SYMMI SubName: Full=Uncharacterized protein {ECO:0000313|EMBL:OLQ02177.1};	--	--	Methyltransferase domain	--	--	--
Cluster-1527.61694	2.1	2.73	4.59	2.14	2.69	0.91	148.92	195.26	365.12	163.59	187.81	73.35	-0.715635	0.100121	0.757619	2294	--	--	--	--	--	--	--	--	--	--
Cluster-1527.4140	1.35	1.97	1.91	1.62	0.07	1.43	48.29	71.09	76.77	62.53	2.64	58.27	-0.71548	0.359638	0.930285	1273	--	--	--	--	--	--	Phytanoyl-CoA dioxygenase (PhyH)	--	--	--
Cluster-1527.80200	0.36	0.77	0.84	3.26	2.84	7.58	6	13	16	59	47	145	2.83734	3.53166e-06	0.0032094	719	K00940 nucleoside-diphosphate kinase [EC:2.7.4.6] | (RefSeq) NDPK3-1; hypothetical protein (A)	hypothetical protein SELMODRAFT_228272 [Selaginella moellendorffii]	NDK3_ARATH RecName: Full=Nucleoside diphosphate kinase III, chloroplastic/mitochondrial; Short=NDK III; Short=NDP kinase III; Short=NDPK III; EC=2.7.4.6; Flags: Precursor;	A0A2D4C0T2_PYTIN RecName: Full=Nucleoside diphosphate kinase {ECO:0000256|RuleBase:RU004013}; EC=2.7.4.6 {ECO:0000256|RuleBase:RU004013};	Nucleoside diphosphate kinase	GO:0009543,chloroplast thylakoid lumen; GO:0005743,mitochondrial inner membrane; GO:0005758,mitochondrial intermembrane space; GO:0005739,mitochondrion; GO:0009536,plastid; GO:0005524,ATP binding; GO:0050897,cobalt ion binding; GO:0004550,nucleoside diphosphate kinase activity; GO:0008270,zinc ion binding; GO:0006241,CTP biosynthetic process; GO:0006183,GTP biosynthetic process; GO:0006979,respon…	Nucleoside diphosphate kinase	--	--	--
Cluster-1527.23777	16.23	11.99	13.75	6.59	6.72	11.68	232	171.84	222.15	101.35	94.37	189.92	-0.715215	0.0357257	0.596769	645	--	--	--	--	--	--	--	--	--	--
Cluster-1527.42810	0.95	0.15	0.64	0.3	0.34	0.39	136.08	21.11	102.28	45.68	48.33	63.69	-0.715144	0.240577	0.886234	4382	--	PREDICTED: uncharacterized protein LOC103956333 [Pyrus x bretschneideri]	--	A0A0R0GPK3_SOYBN SubName: Full=Uncharacterized protein {ECO:0000313|EMBL:KRH17795.1};	--	--	--	--	--	--
Cluster-1527.68294	3.73	5.21	4.4	2.67	2.7	2.69	85.04	119.41	112.75	65.32	60.53	69.48	-0.715113	0.0156013	0.468628	892	--	--	--	B8C006_THAPS SubName: Full=Uncharacterized protein {ECO:0000313|EMBL:EED93437.1};	--	GO:0016021,integral component of membrane; GO:0005575,cellular_component; GO:0016020,membrane; GO:0031224,intrinsic component of membrane; GO:0044425,membrane part	--	--	--	--
Cluster-1527.52420	12.3	11.61	14.49	6.96	7.51	8.59	488	464	645	297	293	386	-0.714534	0.000551085	0.0850161	1383	--	hypothetical protein BE221DRAFT_196603 [Ostreococcus tauri]	--	R1E9R6_EMIHU SubName: Full=Uncharacterized protein {ECO:0000313|EMBL:EOD23440.1, ECO:0000313|EnsemblProtists:EOD23440};	--	GO:0032580,Golgi cisterna membrane; GO:0016021,integral component of membrane; GO:0008417,fucosyltransferase activity; GO:0006486,protein glycosylation; GO:0003674,molecular_function; GO:0003824,catalytic activity; GO:0016740,transferase activity; GO:0016757,transferase activity, transferring glycosyl groups; GO:0016758,transferase activity, transferring hexosyl groups; GO:0008152,metabolic proce…	Glycosyltransferase family 10 (fucosyltransferase) C-term	--	--	--
Cluster-1527.9923	3.42	3.72	5.72	2.81	2.41	2.55	85	93	160	75	59	72	-0.714521	0.0290971	0.564827	952	--	--	--	K0TFM5_THAOC SubName: Full=Uncharacterized protein {ECO:0000313|EMBL:EJK77548.1}; Flags: Fragment;	--	--	TENA/THI-4/PQQC family	--	--	--
Cluster-1527.18654	16.4	22.98	15.72	11.79	13.03	8.65	306.57	431.58	331.32	237	239.5	183.67	-0.713823	0.00510853	0.310462	773	--	--	--	--	--	--	--	--	--	--
Cluster-1527.62107	1.74	2.04	1.37	1.09	0.92	1.1	116.27	137.08	102.16	77.82	60.01	83.18	-0.713539	0.0191394	0.502323	2167	--	--	--	A0A1Q9EUH7_SYMMI SubName: Full=Uncharacterized protein {ECO:0000313|EMBL:OLQ11086.1};	--	--	--	--	--	--
Cluster-1527.66374	5.61	3.67	6.95	4.73	0.07	4.94	181.36	119.46	252.08	164.38	2.19	180.91	-0.713136	0.585245	0.974949	1169	--	--	--	A0A1Q9C7P2_SYMMI SubName: Full=Actin, cytoplasmic {ECO:0000313|EMBL:OLP78938.1};	--	--	AP-3 complex subunit delta-1	--	--	--
Cluster-1527.41285	19.32	31.18	30.03	10.09	21.14	17.15	370.54	600.56	648.88	208.2	398.54	373.41	-0.710914	0.0351556	0.595098	787	--	--	--	A0A1Q9E983_SYMMI SubName: Full=Uncharacterized protein {ECO:0000313|EMBL:OLQ03971.1};	--	--	--	--	--	--
Cluster-1527.47657	1.86	1.34	0	0	1.96	0	58.85	42.85	0	0	61.17	0	-0.710696	0.848964	0.993702	1151	K22763 deubiquitinase DESI2 [EC:3.4.19.12] | (RefSeq) predicted protein (A)	uncharacterized protein LOC109826302 [Asparagus officinalis]	--	A0A1Q9E3I8_SYMMI SubName: Full=DeSI-like protein {ECO:0000313|EMBL:OLQ01985.1};	Uncharacterized conserved protein	GO:0005509,calcium ion binding; GO:0003674,molecular_function; GO:0005488,binding; GO:0046872,metal ion binding; GO:0043167,ion binding; GO:0043169,cation binding	PPPDE putative peptidase domain	--	--	--
Cluster-1527.28978	1.04	0.62	1.02	0.79	0.33	0.5	58.32	35	64.23	47.65	18.22	31.81	-0.709442	0.139431	0.808907	1861	--	--	XB33_ARATH RecName: Full=E3 ubiquitin-protein ligase XBAT33; EC=2.3.2.27; AltName: Full=Ankyrin repeat domain and RING finger-containing protein XBAT33; AltName: Full=Protein XB3 homolog 3; AltName: Full=RING-type E3 ubiquitin transferase XBAT33;	A0A1Q9CF68_SYMMI SubName: Full=Uncharacterized protein {ECO:0000313|EMBL:OLP81551.1};	--	GO:0046872,metal ion binding; GO:0004842,ubiquitin-protein transferase activity; GO:0016567,protein ubiquitination; GO:0003674,molecular_function; GO:0005488,binding; GO:0043167,ion binding; GO:0043169,cation binding; GO:0003824,catalytic activity; GO:0016740,transferase activity; GO:0019787,ubiquitin-like protein transferase activity; GO:0140096,catalytic activity, acting on a protein; GO:000815…	Ankyrin repeats (3 copies)	--	--	--
Cluster-1527.3488	4.74	3.92	6.9	3.8	3.06	2.62	137	114	224	118	87	86	-0.708967	0.0225749	0.529611	1070	--	--	--	--	--	--	--	--	--	--
Cluster-1527.6962	1.3	1.61	1.22	1.24	0.53	0.74	41.81	51.98	43.93	42.93	16.86	27.01	-0.708141	0.128843	0.793866	1165	K09503 DnaJ homolog subfamily A member 2 | (RefSeq) dnj1; molecular chaperone (A)	Chaperone protein dnaJ 2 [Tetrabaena socialis]	DNJH_CUCSA RecName: Full=DnaJ protein homolog; AltName: Full=DNAJ-1; Flags: Precursor;	A0A1Q9CA03_SYMMI SubName: Full=Chaperone protein DnaJ {ECO:0000313|EMBL:OLP79751.1};	--	GO:0005886,plasma membrane; GO:0005524,ATP binding; GO:0031072,heat shock protein binding; GO:0046872,metal ion binding; GO:0051082,unfolded protein binding; GO:0006457,protein folding; GO:0009408,response to heat; GO:0000166,nucleotide binding; GO:0003674,molecular_function; GO:0005488,binding; GO:0008144,drug binding; GO:0017076,purine nucleotide binding; GO:0030554,adenyl nucleotide binding; G…	DnaJ domain	--	--	--
Cluster-1527.38513	0.44	0.26	0.75	0	0	0.82	40.9	24.16	78.73	0.12	0.04	86.64	-0.707836	0.782667	0.987785	2944	--	hypothetical protein GLYMA_13G013300 [Glycine max]	--	A0A0R0GRD0_SOYBN SubName: Full=Uncharacterized protein {ECO:0000313|EMBL:KRH17865.1};	FOG: Zn-finger	--	--	--	--	--
Cluster-1527.43098	10.02	14.39	10.66	7.39	8.21	5.81	636.47	921.64	758.6	504.46	512.89	417.82	-0.706974	0.00153263	0.160608	2077	--	hypothetical protein PHYPA_018990 [Physcomitrella patens]	--	D8RAT1_SELML SubName: Full=Uncharacterized protein {ECO:0000313|EMBL:EFJ30367.1};	Inhibitor of type V adenylyl cyclases/Neuronal presynaptic protein Highwire/PAM/RPM-1	--	RING-type zinc-finger	--	--	--
Cluster-1527.83662	1.26	2.16	1.88	1.36	0.57	1.22	28.18	48.49	47.29	32.57	12.51	30.97	-0.706504	0.171183	0.838166	878	--	--	--	--	--	--	Chordopoxvirus multifunctional envelope protein A27	--	--	--
Cluster-1527.77726	9.38	6.75	12.43	6.34	6.5	4.53	372	269.49	553.29	270.54	253.62	203.5	-0.706423	0.0107399	0.406868	1383	K17506 protein phosphatase 1L [EC:3.1.3.16] | (RefSeq) probable protein phosphatase 2C 58 (A)	hypothetical protein MNEG_0205 [Monoraphidium neglectum]	P2C19_ARATH RecName: Full=Protein phosphatase 2C and cyclic nucleotide-binding/kinase domain-containing protein; Includes: RecName: Full=Probable protein phosphatase 2C 19; Short=AtPP2C19; EC=3.1.3.16; Includes: RecName: Full=Probable inactive cyclic nucleotide-dependent protein kinase At2g20050;	A0A1Q9CZ02_SYMMI SubName: Full=Uncharacterized protein {ECO:0000313|EMBL:OLP88158.1};	Serine/threonine protein phosphatase	GO:0005886,plasma membrane; GO:0005524,ATP binding; GO:0046872,metal ion binding; GO:0004721,phosphoprotein phosphatase activity; GO:0004674,protein serine/threonine kinase activity; GO:0000166,nucleotide binding; GO:0003674,molecular_function; GO:0005488,binding; GO:0008144,drug binding; GO:0017076,purine nucleotide binding; GO:0030554,adenyl nucleotide binding; GO:0032553,ribonucleotide binding…	Protein phosphatase 2C	--	--	--
Cluster-1527.2805	3.51	3.65	4.88	2.73	2.36	2.24	109	114	170	91	72	79	-0.706238	0.0107454	0.406868	1132	--	--	--	A0A1Q9CZP1_SYMMI SubName: Full=Uncharacterized protein {ECO:0000313|EMBL:OLP88395.1};	--	--	--	--	--	--
Cluster-1527.61286	4.97	5.35	7.97	4.85	2.93	3.38	305	331	548	320	177	235	-0.705972	0.0114308	0.413838	2014	K03283 heat shock 70kDa protein 1/2/6/8 | (RefSeq) heat shock 70 kDa protein-like (A)	heat shock 70 kDa protein-like [Prunus avium]	HSP70_SOYBN RecName: Full=Heat shock 70 kDa protein;	Q8S4Q8_CRYCO SubName: Full=Hsp70 {ECO:0000313|EMBL:AAM02973.2};	Molecular chaperones HSP70/HSC70, HSP70 superfamily	GO:0005524,ATP binding; GO:0000166,nucleotide binding; GO:0003674,molecular_function; GO:0005488,binding; GO:0008144,drug binding; GO:0017076,purine nucleotide binding; GO:0030554,adenyl nucleotide binding; GO:0032553,ribonucleotide binding; GO:0032555,purine ribonucleotide binding; GO:0032559,adenyl ribonucleotide binding; GO:0035639,purine ribonucleoside triphosphate binding; GO:0036094,small m…	NAD-specific glutamate dehydrogenase	--	--	--
Cluster-1527.85953	2.96	3.25	1.98	1.64	1.64	1.69	57	63	43	34	31	37	-0.704636	0.0793666	0.725666	790	--	--	--	--	--	--	--	--	--	--
Cluster-1527.17810	7.66	6.12	6.95	4.16	4.68	3.77	218.35	175.4	222.42	127.35	131.17	121.8	-0.704503	0.00195857	0.181965	1058	--	--	--	--	--	--	--	--	--	--
Cluster-1527.86544	1.22	1.38	3.08	2.13	0.86	0.55	49	56	139	92	34	25	-0.703738	0.227781	0.880695	1400	--	--	--	A0A1Q9C7A5_SYMMI SubName: Full=Uncharacterized protein {ECO:0000313|EMBL:OLP78800.1};	--	--	Sulfotransferase family	--	--	--
Cluster-1527.9841	5.3	1.91	6.67	1.92	5.55	1.01	441.61	160.15	622.11	171.95	454.96	95.38	-0.703334	0.234667	0.884356	2652	--	--	--	A0A1Q9F2F2_SYMMI SubName: Full=Esterase {ECO:0000313|EMBL:OLQ13868.1};	--	GO:0016787,hydrolase activity; GO:0008152,metabolic process; GO:0003674,molecular_function; GO:0003824,catalytic activity; GO:0008150,biological_process	Armadillo/beta-catenin-like repeat	--	--	--
Cluster-1527.30495	112.32	47.36	118.13	35.13	76.62	55.75	1876	794	2226	631	1258	1058	-0.703138	0.0712181	0.706704	715	--	hypothetical protein BVRB_034550, partial [Beta vulgaris subsp. vulgaris]	--	A0A0J7YQZ9_BETVU SubName: Full=Uncharacterized protein {ECO:0000313|EMBL:KMS65578.1}; Flags: Fragment;	--	--	--	--	--	--
Cluster-1527.26797	30.44	31.88	22.8	18.35	16.84	16.6	296	310	252	192	161	184	-0.702922	0.00162876	0.164174	512	K01674 carbonic anhydrase [EC:4.2.1.1] | (RefSeq) alpha carbonic anhydrase 7-like (A)	PREDICTED: alpha carbonic anhydrase 7-like [Pyrus x bretschneideri]	--	R1DAV9_EMIHU SubName: Full=Alpha-type carbonic anhydrase {ECO:0000313|EMBL:EOD32568.1}; Flags: Fragment;	--	GO:0004089,carbonate dehydratase activity; GO:0008270,zinc ion binding; GO:0006730,one-carbon metabolic process; GO:0003674,molecular_function; GO:0003824,catalytic activity; GO:0016829,lyase activity; GO:0016835,carbon-oxygen lyase activity; GO:0016836,hydro-lyase activity; GO:0005488,binding; GO:0046872,metal ion binding; GO:0043167,ion binding; GO:0043169,cation binding; GO:0046914,transition …	Eukaryotic-type carbonic anhydrase	--	--	--
Cluster-1527.48958	4.7	3.76	4.49	1.79	2.96	3.05	242	195	259	99	150	178	-0.702631	0.0212311	0.518824	1727	K02967 small subunit ribosomal protein S2 | (RefSeq) rps2, SobiCp015; ribosomal protein S2 (A)	ribosomal protein S2 [Mesostigma viride]	RR2_RHDSA RecName: Full=30S ribosomal protein S2, chloroplastic;	A0A1Q9CLC6_SYMMI SubName: Full=30S ribosomal protein S2 {ECO:0000313|EMBL:OLP83720.1};	Mitochondrial/chloroplast ribosomal protein S2	GO:0009507,chloroplast; GO:0015935,small ribosomal subunit; GO:0003735,structural constituent of ribosome; GO:0006412,translation; GO:0003674,molecular_function; GO:0005198,structural molecule activity; GO:0008152,metabolic process; GO:0006518,peptide metabolic process; GO:0006807,nitrogen compound metabolic process; GO:0008150,biological_process; GO:0009058,biosynthetic process; GO:0009059,macro…	Ribosomal protein S2	--	--	--
Cluster-1527.6265	1.75	2.11	2.33	1.49	1.19	1.11	57	69	85	52	38	41	-0.701366	0.0387551	0.607522	1175	--	hypothetical protein GPECTOR_56g372 [Gonium pectorale]	--	A0A1Q9DVL1_SYMMI SubName: Full=Uncharacterized protein {ECO:0000313|EMBL:OLP99181.1};	--	GO:0016021,integral component of membrane; GO:0005575,cellular_component; GO:0016020,membrane; GO:0031224,intrinsic component of membrane; GO:0044425,membrane part	--	--	--	--
Cluster-1527.26633	47.41	42.49	45.27	29.38	41.23	13.89	82	72	95	55	70	28	-0.700426	0.0999988	0.757541	272	--	--	--	--	--	--	--	--	--	--
Cluster-1527.68942	8.98	4.11	4.8	5.31	3.32	2.43	79	36.08	48.09	50.32	28.67	24.44	-0.700155	0.16101	0.829849	485	--	--	--	--	--	--	--	--	--	--
Cluster-1527.62724	11.98	10.21	21.8	10.09	7.37	9.34	243	208	498	220	147	215	-0.700044	0.0358714	0.596787	819	--	--	--	--	--	--	RNA polymerase II-binding domain.	--	--	--
Cluster-1527.80916	4.89	6.4	5.11	4.04	2.77	3.21	36	47	43	32	20	27	-0.699718	0.100094	0.757541	443	--	--	--	--	--	--	--	--	--	--
Cluster-1527.8029	8.57	7.63	11.58	4.96	5.83	6.07	260	233	395	162	174	209	-0.699196	0.00666746	0.346011	1112	--	--	--	--	--	--	--	--	--	--
Cluster-1527.9078	3.7	4.06	6.67	3.54	2.92	2.4	143	158	289	147	111	105	-0.699142	0.0255089	0.54504	1353	--	--	--	--	--	--	Phytanoyl-CoA dioxygenase (PhyH)	--	--	--
Cluster-1527.79520	0.89	0.16	1.08	0.74	0	0.55	45	8.21	61.48	40.38	0	31.74	-0.698809	0.537638	0.968985	1703	K05941 glutathione gamma-glutamylcysteinyltransferase [EC:2.3.2.15] | (RefSeq) glutathione gamma-glutamylcysteinyltransferase 3-like (A)	PREDICTED: glutathione gamma-glutamylcysteinyltransferase 3-like isoform X2 [Gossypium raimondii]	PCS3_LOTJA RecName: Full=Glutathione gamma-glutamylcysteinyltransferase 3; EC=2.3.2.15; AltName: Full=LjPCS3-7N; AltName: Full=Phytochelatin synthase 3;	A0A1Q9EBZ8_SYMMI SubName: Full=Glutathione gamma-glutamylcysteinyltransferase 1 {ECO:0000313|EMBL:OLQ04932.1};	Phytochelatin synthase	GO:0016756,glutathione gamma-glutamylcysteinyltransferase activity; GO:0046872,metal ion binding; GO:0046938,phytochelatin biosynthetic process; GO:0010038,response to metal ion; GO:0003674,molecular_function; GO:0003824,catalytic activity; GO:0016740,transferase activity; GO:0016746,transferase activity, transferring acyl groups; GO:0016755,transferase activity, transferring amino-acyl groups; G…	Phytochelatin synthase	--	--	--
Cluster-1527.61169	5.27	6.05	7.55	3.88	3.41	4.2	154	178	248	122	98	139	-0.698691	0.00786056	0.365736	1079	--	--	--	R1DPF9_EMIHU SubName: Full=Uncharacterized protein {ECO:0000313|EMBL:EOD36867.1, ECO:0000313|EnsemblProtists:EOD36867};	--	--	--	--	--	--
Cluster-1527.5362	3.12	4.14	3.51	2.72	1.45	2.4	48	64	61	45	22	42	-0.696859	0.0898015	0.742977	677	--	--	--	A0A1Q9D9Z5_SYMMI SubName: Full=Calcium-dependent protein kinase 3 {ECO:0000313|EMBL:OLP92024.1};	--	GO:0005524,ATP binding; GO:0004672,protein kinase activity; GO:0000166,nucleotide binding; GO:0003674,molecular_function; GO:0005488,binding; GO:0008144,drug binding; GO:0017076,purine nucleotide binding; GO:0030554,adenyl nucleotide binding; GO:0032553,ribonucleotide binding; GO:0032555,purine ribonucleotide binding; GO:0032559,adenyl ribonucleotide binding; GO:0035639,purine ribonucleoside trip…	--	--	--	--
Cluster-1527.83386	2.38	2.63	2.16	1.47	1.07	1.8	36	40	37	24	16	31	-0.696035	0.13334	0.799246	670	--	--	--	R1BQE9_EMIHU SubName: Full=Uncharacterized protein {ECO:0000313|EMBL:EOD12323.1, ECO:0000313|EnsemblProtists:EOD12323};	--	GO:0016021,integral component of membrane; GO:0005575,cellular_component; GO:0016020,membrane; GO:0031224,intrinsic component of membrane; GO:0044425,membrane part	Permuted papain-like amidase enzyme, YaeF/YiiX, C92 family	--	--	--
Cluster-1527.14402	3.95	4.22	4.51	2.7	1.58	3.4	171.82	184.82	219.87	126.06	67.57	167.62	-0.695863	0.0389832	0.608636	1493	--	--	--	A0A1Q9F2D2_SYMMI SubName: Full=Uncharacterized protein {ECO:0000313|EMBL:OLQ13772.1};	--	--	Poly(ADP-ribose) polymerase catalytic domain	--	--	--
Cluster-1527.458	0.53	0.59	0.58	2.31	2.47	6.94	9	10	11	42	41	133	2.83595	8.58476e-06	0.00584689	720	K02865 large subunit ribosomal protein L10Ae | (RefSeq) 60S ribosomal protein L10A (A)	hypothetical protein CICLE_v10030134mg [Citrus clementina]	R10A1_ARATH RecName: Full=60S ribosomal protein L10a-1;	A0A1J3E5C1_NOCCA RecName: Full=Ribosomal protein {ECO:0000256|RuleBase:RU000659}; Flags: Fragment;	60S ribosomal protein L10A	GO:0005829,cytosol; GO:0022625,cytosolic large ribosomal subunit; GO:0022626,cytosolic ribosome; GO:0005886,plasma membrane; GO:0009506,plasmodesma; GO:0042788,polysomal ribosome; GO:0003723,RNA binding; GO:0003735,structural constituent of ribosome; GO:0000470,maturation of LSU-rRNA; GO:0006412,translation; GO:0003674,molecular_function; GO:0003676,nucleic acid binding; GO:0005488,binding; GO:00…	Ribosomal protein L1p/L10e family	--	--	--
Cluster-1527.81978	0.56	0.7	1.55	0.88	0.45	0.41	28	35	86	47	22	23	-0.695465	0.218	0.874166	1673	--	--	--	A0A1Q9CJM3_SYMMI SubName: Full=Uncharacterized protein {ECO:0000313|EMBL:OLP83122.1};	--	--	Cupin-like domain	--	--	--
Cluster-1527.29269	7.69	5.35	15.43	6.11	8.72	2.75	274.2	191.97	617.47	234.37	305.82	111.2	-0.695024	0.14069	0.80904	1266	K02950 small subunit ribosomal protein S12 | (RefSeq) uncharacterized protein LOC114171184 (A)	BnaC09g29270D [Brassica napus]	--	A0A0V0H8Z9_SOLCH SubName: Full=Putative ovule protein {ECO:0000313|EMBL:JAP16022.1};	--	--	--	--	--	--
Cluster-1527.65641	1.33	1.72	2.25	1.55	0.86	0.87	80.65	105.12	153.15	101.01	51.19	59.82	-0.694731	0.0575842	0.676312	1996	--	--	--	A0A1Q9D074_SYMMI SubName: Full=Sister chromatid cohesion protein PDS5-like A {ECO:0000313|EMBL:OLP88562.1};	--	--	--	--	--	--
Cluster-1527.19008	6.19	7.3	6.15	3.56	3.87	4.52	392.75	467.23	437.3	242.97	241.81	324.84	-0.694561	0.00147431	0.156104	2075	K16911 ATP-dependent RNA helicase DDX21 [EC:3.6.4.13] | (RefSeq) DEAD-box ATP-dependent RNA helicase 7-like (A)	hypothetical protein AALP_AA8G452500 [Arabis alpina]	RH7_ORYSJ RecName: Full=DEAD-box ATP-dependent RNA helicase 7; EC=3.6.4.13;	A0A1Q9DJX1_SYMMI SubName: Full=DEAD-box ATP-dependent RNA helicase 7 {ECO:0000313|EMBL:OLP95466.1};	ATP-dependent RNA helicase	GO:0005737,cytoplasm; GO:0005730,nucleolus; GO:0005524,ATP binding; GO:0004004,ATP-dependent RNA helicase activity; GO:0003723,RNA binding; GO:0010501,RNA secondary structure unwinding; GO:0000166,nucleotide binding; GO:0003674,molecular_function; GO:0005488,binding; GO:0008144,drug binding; GO:0017076,purine nucleotide binding; GO:0030554,adenyl nucleotide binding; GO:0032553,ribonucleotide bind…	DEAD/DEAH box helicase	--	--	--
Cluster-1527.2898	2.57	1.76	3.55	1.87	1.17	1.78	74	51	115	58	33	58	-0.694415	0.0913495	0.74457	1067	--	PREDICTED: uncharacterized protein LOC109205496 [Nicotiana attenuata]	--	A0A1S3TY72_VIGRR SubName: Full=uncharacterized protein LOC106759865 {ECO:0000313|RefSeq:XP_014498714.1};	--	GO:0016021,integral component of membrane; GO:0005575,cellular_component; GO:0016020,membrane; GO:0031224,intrinsic component of membrane; GO:0044425,membrane part	--	--	--	--
Cluster-1527.38018	19.43	18.36	21.82	11.42	15.05	10.14	510.87	485.58	644.97	322.82	389.04	302.44	-0.69417	0.000940391	0.116368	994	--	--	--	A0A1Q9DXZ4_SYMMI SubName: Full=Putative cardiolipin-specific deacylase, mitochondrial {ECO:0000313|EMBL:OLQ00043.1};	--	GO:0016021,integral component of membrane; GO:0005575,cellular_component; GO:0016020,membrane; GO:0031224,intrinsic component of membrane; GO:0044425,membrane part	--	--	--	--
Cluster-1527.69240	1.53	3.35	3.01	1.31	2.79	0.78	107.5	237.21	236.95	98.56	193.08	62.36	-0.693372	0.157328	0.827122	2272	--	--	--	A0A1Q9D555_SYMMI SubName: Full=Uncharacterized protein {ECO:0000313|EMBL:OLP90331.1};	--	GO:0016021,integral component of membrane; GO:0005575,cellular_component; GO:0016020,membrane; GO:0031224,intrinsic component of membrane; GO:0044425,membrane part	DnaJ domain	--	--	--
Cluster-1527.79745	0.65	0.45	0.84	0.53	0.34	0.32	44.05	30.78	63.36	38.37	22.94	24.75	-0.692651	0.126281	0.790433	2199	--	--	--	A0A1Q9EJ66_SYMMI SubName: Full=Zinc finger CCCH domain-containing protein 3 {ECO:0000313|EMBL:OLQ07496.1};	--	GO:0046872,metal ion binding; GO:0003723,RNA binding; GO:0003674,molecular_function; GO:0005488,binding; GO:0043167,ion binding; GO:0043169,cation binding; GO:0003676,nucleic acid binding; GO:0097159,organic cyclic compound binding; GO:1901363,heterocyclic compound binding	--	--	--	--
Cluster-1527.68191	4.89	2.88	2.14	1.69	3.2	1.22	378.64	224.99	185.59	141.1	243.96	107.02	-0.692612	0.108528	0.771588	2482	--	--	--	A0A1Q9EB00_SYMMI SubName: Full=Sodium channel protein type 11 subunit alpha {ECO:0000313|EMBL:OLQ04606.1};	--	GO:0016021,integral component of membrane; GO:0005509,calcium ion binding; GO:0005216,ion channel activity; GO:0003674,molecular_function; GO:0005488,binding; GO:0046872,metal ion binding; GO:0043167,ion binding; GO:0043169,cation binding; GO:0005215,transporter activity; GO:0022857,transmembrane transporter activity; GO:0015075,ion transmembrane transporter activity; GO:0015267,channel activity;…	Ion transport protein	--	--	--
Cluster-1527.40357	4.84	3.84	4.82	3.1	2.24	2.93	390.56	312.86	435.86	268.94	178.01	268.08	-0.691941	0.00178079	0.173742	2578	--	--	--	A0A1Q9C6E8_SYMMI SubName: Full=Uncharacterized protein {ECO:0000313|EMBL:OLP78500.1};	--	GO:0016021,integral component of membrane; GO:0005509,calcium ion binding; GO:0003674,molecular_function; GO:0005488,binding; GO:0046872,metal ion binding; GO:0043167,ion binding; GO:0043169,cation binding; GO:0005575,cellular_component; GO:0016020,membrane; GO:0031224,intrinsic component of membrane; GO:0044425,membrane part	--	--	--	--
Cluster-1527.12708	6.44	6.31	7.22	4.35	3.55	4.33	227	224	286	165	123	173	-0.691679	0.00141337	0.151384	1255	--	--	--	--	--	--	--	--	--	--
Cluster-1527.81522	6.56	6.38	9.27	6.21	3.79	3.73	394	386	624	401	224	254	-0.691282	0.00908996	0.387022	1976	--	--	--	--	--	--	PPR repeat family	--	--	--
Cluster-1527.18504	1.03	3.23	2.36	2.73	1.05	0.39	57.42	181.38	147.31	163.65	57.81	24.61	-0.690624	0.281952	0.905535	1852	--	--	--	A0A1Q9DZ39_SYMMI SubName: Full=Uncharacterized protein {ECO:0000313|EMBL:OLQ00440.1};	--	GO:0016021,integral component of membrane; GO:0005575,cellular_component; GO:0016020,membrane; GO:0031224,intrinsic component of membrane; GO:0044425,membrane part	--	--	--	--
Cluster-1527.27371	4.92	4.24	7.08	5.7	3.64	0.91	214.62	186.4	346	267.04	156.16	45.16	-0.68939	0.187563	0.853693	1497	--	--	--	A0A1Q9F2Y6_SYMMI SubName: Full=Uncharacterized protein {ECO:0000313|EMBL:OLQ13972.1};	--	GO:0008270,zinc ion binding; GO:0003674,molecular_function; GO:0005488,binding; GO:0046872,metal ion binding; GO:0043167,ion binding; GO:0043169,cation binding; GO:0046914,transition metal ion binding	Zinc finger C-x8-C-x5-C-x3-H type (and similar)	C3H	TF	C3H
Cluster-1527.38763	62.27	73.49	71.19	48.95	47.01	32.22	1095.69	1298.29	1412.65	926.46	813.15	643.94	-0.689033	0.000239891	0.0500074	741	--	--	--	--	--	--	--	--	--	--
Cluster-1527.57977	3.14	3.48	6.62	3.3	2.58	2.29	230	257	543	260	186	190	-0.688684	0.0353267	0.595891	2358	K03715 1,2-diacylglycerol 3-beta-galactosyltransferase [EC:2.4.1.46] | (RefSeq) Monogalactosyldiacylglycerol synthase, family GT28 (A)	monogalactosyldiacylglycerol synthase 2, chloroplastic [Sesamum indicum]	MGDG_SPIOL RecName: Full=Monogalactosyldiacylglycerol synthase, chloroplastic; Short=SoMGD1; EC=2.4.1.46; AltName: Full=MGDG synthase type A; Flags: Precursor;	A0A1Q9C2G1_SYMMI SubName: Full=Monogalactosyldiacylglycerol synthase 1, chloroplastic {ECO:0000313|EMBL:OLP77106.1};	--	GO:0009706,chloroplast inner membrane; GO:0046509,1,2-diacylglycerol 3-beta-galactosyltransferase activity; GO:0009247,glycolipid biosynthetic process; GO:0003674,molecular_function; GO:0003824,catalytic activity; GO:0008194,UDP-glycosyltransferase activity; GO:0008378,galactosyltransferase activity; GO:0016740,transferase activity; GO:0016757,transferase activity, transferring glycosyl groups; G…	Monogalactosyldiacylglycerol (MGDG) synthase	--	--	--
Cluster-1527.51851	1.41	2.58	1.24	0.73	1.84	0.66	67.66	124.14	66.43	37.28	86.62	36.02	-0.688187	0.192207	0.85645	1620	--	--	--	A0A1Q9E6A2_SYMMI SubName: Full=Uncharacterized protein {ECO:0000313|EMBL:OLQ02943.1};	--	--	Stage V sporulation protein S (SpoVS)	--	--	--
Cluster-1527.15365	1.5	2.6	2.24	1.08	0.87	1.87	29.31	51.05	49.28	22.58	16.66	41.4	-0.687323	0.184496	0.851155	797	--	--	--	--	--	--	--	--	--	--
Cluster-1527.3848	2.35	1.72	1.8	1.34	0.8	1.44	79.3	58.38	68.12	48.38	26.57	55.04	-0.68633	0.0816841	0.730975	1209	--	--	--	A0A1Q9DZ39_SYMMI SubName: Full=Uncharacterized protein {ECO:0000313|EMBL:OLQ00440.1};	--	GO:0016021,integral component of membrane; GO:0005575,cellular_component; GO:0016020,membrane; GO:0031224,intrinsic component of membrane; GO:0044425,membrane part	--	--	--	--
Cluster-1527.29340	35.94	55.17	53.43	30.58	37.35	21.66	1063.69	1643.12	1776.59	973.07	1086.91	727.07	-0.686023	0.00700345	0.351667	1090	--	--	--	W4FLC4_9STRA SubName: Full=Uncharacterized protein {ECO:0000313|EMBL:ETV67681.1};	--	--	Enoyl-(Acyl carrier protein) reductase	--	--	--
Cluster-1527.85194	3.63	3.61	4	3.26	2.18	1.56	88	88	109	85	52	43	-0.685856	0.046226	0.631923	934	--	--	--	--	--	--	--	--	--	--
Cluster-1527.23908	0.73	0.9	1.07	0.56	0.49	0.62	61.79	76.95	101.46	50.5	40.57	59.3	-0.685647	0.0445177	0.626306	2682	--	--	--	A0A1Q9DUK8_SYMMI SubName: Full=Uncharacterized protein {ECO:0000313|EMBL:OLP98857.1};	--	GO:0016021,integral component of membrane; GO:0005575,cellular_component; GO:0016020,membrane; GO:0031224,intrinsic component of membrane; GO:0044425,membrane part	Acyltransferase family	--	--	--
Cluster-1527.57660	0.94	1.08	1.64	0.6	1.7	0	50.58	59.06	99.37	35.05	90.11	0	-0.684844	0.671202	0.980263	1800	--	--	--	A0A1Q9ESE2_SYMMI SubName: Full=Uncharacterized protein {ECO:0000313|EMBL:OLQ10347.1};	--	--	--	--	--	--
Cluster-1527.26433	46.5	52.3	53.65	33.17	26.18	34.36	255	285	339	196	141	216	-0.684816	0.00225311	0.196813	388	--	--	--	--	--	--	--	--	--	--
Cluster-1527.26271	14.24	13.8	15.74	10.48	7.99	8.57	350	341	435	277	193	239	-0.684658	0.000277788	0.054953	944	K15109 solute carrier family 25 (mitochondrial carnitine/acylcarnitine transporter), member 20/29 | (RefSeq) mitochondrial carrier family (A)	mitochondrial carrier family, partial [Micromonas commoda]	BAC2_ARATH RecName: Full=Mitochondrial arginine transporter BAC2; AltName: Full=Mitochondrial basic amino acid carrier 2; Short=AtMBAC2;	D7FY68_ECTSI SubName: Full=Similar to Mitochondrial ornithine transporter 1 {ECO:0000313|EMBL:CBJ26507.1};	Mitochondrial carnitine-acylcarnitine carrier protein	GO:0016021,integral component of membrane; GO:0005743,mitochondrial inner membrane; GO:0005739,mitochondrion; GO:0015181,arginine transmembrane transporter activity; GO:0005290,L-histidine transmembrane transporter activity; GO:0015189,L-lysine transmembrane transporter activity; GO:0000064,L-ornithine transmembrane transporter activity; GO:0006844,acyl carnitine transport; GO:0006972,hyperosmoti…	Mitochondrial carrier protein	--	--	--
Cluster-1527.23539	1.91	1.1	2.24	2.35	0.81	0.18	159.03	91.97	208.29	210.05	66.54	16.97	-0.684391	0.317815	0.916894	2647	K14510 serine/threonine-protein kinase CTR1 [EC:2.7.11.1] | (RefSeq) serine/threonine-protein kinase CTR1-like isoform X1 (A)	PREDICTED: dual specificity protein kinase splB isoform X1 [Theobroma cacao]	EDR1_ARATH RecName: Full=Serine/threonine-protein kinase EDR1; EC=2.7.11.1; AltName: Full=MAPKK kinase EDR1; AltName: Full=Protein ENHANCED DISEASE RESISTANCE 1; Short=AtEDR1; AltName: Full=Serine/threonine/tyrosine-protein kinase 10;	A0A1Q9DKQ9_SYMMI RecName: Full=Alpha-galactosidase {ECO:0000256|RuleBase:RU361168}; EC=3.2.1.22 {ECO:0000256|RuleBase:RU361168}; AltName: Full=Melibiase {ECO:0000256|RuleBase:RU361168};	Tyrosine kinase specific for activated (GTP-bound) p21cdc42Hs	GO:0005829,cytosol; GO:0005769,early endosome; GO:0005783,endoplasmic reticulum; GO:0005768,endosome; GO:0005634,nucleus; GO:0005886,plasma membrane; GO:0005802,trans-Golgi network; GO:0012510,trans-Golgi network transport vesicle membrane; GO:0005524,ATP binding; GO:0016301,kinase activity; GO:0004709,MAP kinase kinase kinase activity; GO:0004712,protein serine/threonine/tyrosine kinase activity…	Protein kinase domain	--	--	--
Cluster-1527.70245	1.9	0.98	0.21	0.77	0	1.12	61.77	31.86	7.83	26.78	0	41.25	-0.683988	0.558022	0.971652	1173	--	--	--	A0A1Q9ER61_SYMMI SubName: Full=Rieske domain-containing protein {ECO:0000313|EMBL:OLQ09914.1};	--	GO:0051537,2 iron, 2 sulfur cluster binding; GO:0016491,oxidoreductase activity; GO:0003674,molecular_function; GO:0005488,binding; GO:0048037,cofactor binding; GO:0051536,iron-sulfur cluster binding; GO:0051540,metal cluster binding; GO:0003824,catalytic activity	--	--	--	--
Cluster-1527.45857	20.37	27.45	22.71	16.38	17.17	10.31	350.65	474.39	440.96	303.39	290.63	201.64	-0.683479	0.00555815	0.320253	730	K10808 ribonucleoside-diphosphate reductase subunit M2 [EC:1.17.4.1] | (RefSeq) hypothetical protein (A)	hypothetical protein CHLNCDRAFT_34102 [Chlorella variabilis]	RIR2A_ARATH RecName: Full=Ribonucleoside-diphosphate reductase small chain A; EC=1.17.4.1; AltName: Full=Ribonucleoside-diphosphate reductase R2A subunit; Short=AtRNR2; Short=Protein R2at; AltName: Full=Ribonucleotide reductase small subunit A;	A0A1Q9C2M9_SYMMI SubName: Full=Ribonucleoside-diphosphate reductase small chain C {ECO:0000313|EMBL:OLP77184.1};	Ribonucleotide reductase, beta subunit	GO:0005829,cytosol; GO:0005971,ribonucleoside-diphosphate reductase complex; GO:0046872,metal ion binding; GO:0004748,ribonucleoside-diphosphate reductase activity, thioredoxin disulfide as acceptor; GO:0009263,deoxyribonucleotide biosynthetic process; GO:0006281,DNA repair; GO:0006260,DNA replication; GO:0007275,multicellular organism development; GO:0051726,regulation of cell cycle; GO:0009259,…	Ribonucleotide reductase, small chain	--	--	--
Cluster-1527.23887	98.35	95.07	73.61	63.03	38.48	63.04	65	61	61	45	25	49	-0.682518	0.0787222	0.724258	227	--	--	--	--	--	--	--	--	--	--
Cluster-1527.38098	3.18	3.63	2.31	1.1	2.57	1.92	84.66	97.23	69.14	31.57	67.44	58.14	-0.681976	0.113809	0.775805	1004	--	--	--	A0A1Q9CTL2_SYMMI RecName: Full=Poly [ADP-ribose] polymerase {ECO:0000256|RuleBase:RU362114}; Short=PARP {ECO:0000256|RuleBase:RU362114}; EC=2.4.2.30 {ECO:0000256|RuleBase:RU362114}; EC=3.2.1.- {ECO:0000256|RuleBase:RU000489};	--	GO:0005576,extracellular region; GO:0016021,integral component of membrane; GO:0008061,chitin binding; GO:0020037,heme binding; GO:0004553,hydrolase activity, hydrolyzing O-glycosyl compounds; GO:0046872,metal ion binding; GO:0003950,NAD+ ADP-ribosyltransferase activity; GO:0016491,oxidoreductase activity; GO:0031625,ubiquitin protein ligase binding; GO:0005975,carbohydrate metabolic process; GO:…	Poly(ADP-ribose) polymerase catalytic domain	--	--	--
Cluster-1527.60976	3.87	3.26	2.61	0.47	1.75	3.6	56.46	47.82	43.02	7.34	25.13	59.77	-0.681201	0.336265	0.924291	654	--	hypothetical protein EUTSA_v10019246mg [Eutrema salsugineum]	CNR9_MAIZE RecName: Full=Cell number regulator 9; AltName: Full=ZmCNR09;	A0A0D9XHA6_9ORYZ SubName: Full=Uncharacterized protein {ECO:0000313|EnsemblPlants:LPERR10G00420.1};	--	GO:0016021,integral component of membrane; GO:0005575,cellular_component; GO:0016020,membrane; GO:0031224,intrinsic component of membrane; GO:0044425,membrane part	PLAC8 family	--	--	--
Cluster-1527.60402	15.57	14.29	17.62	12.36	6.85	10.2	837	774	1061	714	362	621	-0.680069	0.00478234	0.301344	1792	K01510 apyrase [EC:3.6.1.5] | (RefSeq) hypothetical protein (A)	nucleoside phosphatase family protein [Klebsormidium nitens]	APY4_ARATH RecName: Full=Probable apyrase 4; Short=AtAPY4; EC=3.6.1.5; AltName: Full=ATP-diphosphatase; AltName: Full=ATP-diphosphohydrolase; AltName: Full=Adenosine diphosphatase; Short=ADPase; AltName: Full=NTPDase; AltName: Full=Nucleoside triphosphate diphosphohydrolase 4;	A0A1Q9DGZ9_SYMMI SubName: Full=Ectonucleoside triphosphate diphosphohydrolase 1 {ECO:0000313|EMBL:OLP94478.1};	Nucleoside phosphatase	GO:0016021,integral component of membrane; GO:0102490,8-oxo-dGTP phosphohydrolase activity; GO:0005524,ATP binding; GO:0102485,dATP phosphohydrolase activity; GO:0102486,dCTP phosphohydrolase activity; GO:0102491,dGTP phosphohydrolase activity; GO:0102488,dTTP phosphohydrolase activity; GO:0102487,dUTP phosphohydrolase activity; GO:0102489,GTP phosphohydrolase activity; GO:0003674,molecular_funct…	GDA1/CD39 (nucleoside phosphatase) family	--	--	--
Cluster-1527.82840	3.03	2.39	2.85	1.3	1.84	1.9	92.23	73.22	97.44	42.53	55	65.57	-0.679591	0.0462593	0.631923	1113	K11153 retinol dehydrogenase 12 [EC:1.1.1.300] | (RefSeq) hypothetical protein (A)	NAD(P)-binding protein [Coccomyxa subellipsoidea C-169]	TIC32_ARATH RecName: Full=Short-chain dehydrogenase TIC 32, chloroplastic; EC=1.1.1.-; AltName: Full=Translocon at the inner envelope membrane of chloroplasts 32; Short=AtTIC32;	W2Q4S7_PHYPN SubName: Full=Uncharacterized protein {ECO:0000313|EMBL:ETN07861.1};	Dehydrogenases with different specificities (related to short-chain alcohol dehydrogenases)	GO:0009507,chloroplast; GO:0009941,chloroplast envelope; GO:0009706,chloroplast inner membrane; GO:0005886,plasma membrane; GO:0016491,oxidoreductase activity; GO:0015031,protein transport; GO:0003674,molecular_function; GO:0003824,catalytic activity; GO:0008104,protein localization; GO:0006810,transport; GO:0008150,biological_process; GO:0015833,peptide transport; GO:0033036,macromolecule locali…	short chain dehydrogenase	--	--	--
Cluster-1527.5432	0.8	1.58	1.94	1.36	0.6	0.74	19	38	52	35	14	20	-0.679243	0.23699	0.88483	923	--	hypothetical protein GPECTOR_43g893 [Gonium pectorale]	--	A0A1X6PK79_PORUM SubName: Full=Uncharacterized protein {ECO:0000313|EMBL:OSX81166.1};	--	GO:0016021,integral component of membrane; GO:0005575,cellular_component; GO:0016020,membrane; GO:0031224,intrinsic component of membrane; GO:0044425,membrane part	--	--	--	--
Cluster-1527.28816	0.5	0.97	0.81	0.36	0.87	0.19	37.4	74.06	68.33	28.85	64.79	16.31	-0.679156	0.263608	0.898282	2423	--	--	--	A0A1Q9DK90_SYMMI SubName: Full=Uncharacterized protein {ECO:0000313|EMBL:OLP95586.1};	--	GO:0016021,integral component of membrane; GO:0005575,cellular_component; GO:0016020,membrane; GO:0031224,intrinsic component of membrane; GO:0044425,membrane part	Putative CRISPR-associated protein (Cas_VVA1548)	--	--	--
Cluster-1527.44295	29.01	26.6	34.77	18.33	22.08	15.72	337.95	310.23	458.91	229.7	252.85	208.44	-0.678458	0.00205387	0.18723	568	--	--	--	--	--	--	MORN repeat	--	--	--
Cluster-1527.63180	3.18	3.75	3.79	2.56	2.13	1.97	185.27	220.3	247.49	160.44	122.27	130.45	-0.67845	0.00190414	0.179788	1926	--	--	--	A0A1Q9EN51_SYMMI SubName: Full=Putative voltage-dependent R-type calcium channel subunit alpha-1E {ECO:0000313|EMBL:OLQ08876.1};	--	GO:0016021,integral component of membrane; GO:0005216,ion channel activity; GO:0003674,molecular_function; GO:0005215,transporter activity; GO:0022857,transmembrane transporter activity; GO:0015075,ion transmembrane transporter activity; GO:0015267,channel activity; GO:0015318,inorganic molecular entity transmembrane transporter activity; GO:0022803,passive transmembrane transporter activity; GO:…	Ion transport protein	--	--	--
Cluster-1527.46605	10.4	9.51	13.64	7.66	7.54	5.68	739.19	681.97	1086.49	585.46	527.08	456.95	-0.677444	0.000905417	0.115314	2297	K10393 kinesin family member 2/24 | (RefSeq) kinesin-like protein KIN-13A (A)	hypothetical protein LSAT_5X62360 [Lactuca sativa]	KN13B_ORYSJ RecName: Full=Kinesin-like protein KIN-13B {ECO:0000305};	A0A1Q9DKB7_SYMMI RecName: Full=Kinesin-like protein {ECO:0000256|RuleBase:RU000394};	Kinesin-like protein	GO:0005874,microtubule; GO:0005524,ATP binding; GO:0008017,microtubule binding; GO:0003777,microtubule motor activity; GO:0007018,microtubule-based movement; GO:0000166,nucleotide binding; GO:0003674,molecular_function; GO:0005488,binding; GO:0008144,drug binding; GO:0017076,purine nucleotide binding; GO:0030554,adenyl nucleotide binding; GO:0032553,ribonucleotide binding; GO:0032555,purine ribon…	Kinesin motor domain	--	--	--
Cluster-1527.28123	5.67	6.72	3.88	3.43	3.47	3.21	156.8	186.98	120.82	102.03	94.43	100.72	-0.676366	0.0240642	0.535138	1034	--	--	--	--	--	--	--	--	--	--
Cluster-1527.23246	2.76	0.89	1.38	1.09	0.88	1.14	113.27	36.97	63.43	48.3	35.4	53.16	-0.67621	0.171625	0.838286	1424	--	--	--	--	--	--	MORN repeat	--	--	--
Cluster-1527.47471	1.49	5.3	3.41	2.15	2.52	1.69	31.63	113.18	81.57	49.01	52.69	40.74	-0.675963	0.181959	0.84887	847	--	--	--	B8BSR8_THAPS SubName: Full=Uncharacterized protein {ECO:0000313|EMBL:EED95591.1};	--	--	--	--	--	--
Cluster-1527.27466	3.85	3.23	2.95	1.88	2.35	1.98	175	148	150	92	105	102	-0.675694	0.0100669	0.398791	1550	--	--	--	A0A1Q9DMG5_SYMMI SubName: Full=Uncharacterized protein {ECO:0000313|EMBL:OLP96377.1};	--	--	--	--	--	--
Cluster-1527.10864	0.27	0.27	0.36	0.96	1.6	3.49	6	6	9	23	35	88	2.80147	8.14872e-05	0.0248131	876	--	--	--	--	--	--	--	--	--	--
Cluster-1527.26376	7.72	6.62	6.55	5.82	5.36	2.04	39.47	33.6	38.67	32.08	26.9	11.98	-0.675627	0.190974	0.854993	377	--	--	--	--	--	--	--	--	--	--
Cluster-1527.70366	8.49	6.11	11.61	4.78	6.13	5.29	346.77	251.28	531.82	210.08	246.04	244.82	-0.675311	0.018192	0.492388	1417	K02218 casein kinase 1 [EC:2.7.11.1] | (RefSeq) casein kinase 1-like protein 2 (A)	PREDICTED: casein kinase 1-like protein 2 [Musa acuminata subsp. malaccensis]	CKL12_ARATH RecName: Full=Casein kinase 1-like protein 12 {ECO:0000305}; EC=2.7.11.1 {ECO:0000305}; AltName: Full=Protein CASEIN KINASE I-LIKE 12 {ECO:0000303|PubMed:16126836};	M0TTE7_MUSAM SubName: Full=Uncharacterized protein {ECO:0000313|EnsemblPlants:GSMUA_Achr8P24940_001};	Casein kinase (serine/threonine/tyrosine protein kinase)	GO:0005737,cytoplasm; GO:0005634,nucleus; GO:0005524,ATP binding; GO:0004674,protein serine/threonine kinase activity; GO:0006897,endocytosis; GO:0018105,peptidyl-serine phosphorylation; GO:0008360,regulation of cell shape; GO:0000166,nucleotide binding; GO:0003674,molecular_function; GO:0005488,binding; GO:0008144,drug binding; GO:0017076,purine nucleotide binding; GO:0030554,adenyl nucleotide b…	Protein kinase domain	--	--	--
Cluster-1527.72907	4.38	4.2	5.61	3.5	3.48	1.93	163.11	157.75	234.59	140.27	127.68	81.38	-0.675088	0.0244034	0.538683	1313	--	--	--	--	--	--	--	--	--	--
Cluster-1527.64539	2.39	2.13	3.1	1.54	1.53	1.66	101.52	91.08	147.61	70.44	64	80.14	-0.67451	0.023587	0.533107	1465	--	--	--	A0A1Q9DNE1_SYMMI SubName: Full=Voltage-dependent T-type calcium channel subunit alpha-1H {ECO:0000313|EMBL:OLP96691.1};	--	GO:0016021,integral component of membrane; GO:0005509,calcium ion binding; GO:0005216,ion channel activity; GO:0003674,molecular_function; GO:0005488,binding; GO:0046872,metal ion binding; GO:0043167,ion binding; GO:0043169,cation binding; GO:0005215,transporter activity; GO:0022857,transmembrane transporter activity; GO:0015075,ion transmembrane transporter activity; GO:0015267,channel activity;…	Ion transport protein	--	--	--
Cluster-1527.17975	7.96	7.52	10.38	6.06	4.93	5.09	309	294	452	253	188	224	-0.674465	0.00170218	0.168365	1358	K22459 procollagen-proline 3-dioxygenase 2 [EC:1.14.11.7] | (RefSeq) hypothetical protein (A)	predicted protein [Micromonas pusilla CCMP1545]	--	L1IJW7_GUITH SubName: Full=Uncharacterized protein {ECO:0000313|EMBL:EKX36100.1, ECO:0000313|EnsemblProtists:EKX36100};	--	GO:0005506,iron ion binding; GO:0031418,L-ascorbic acid binding; GO:0016705,oxidoreductase activity, acting on paired donors, with incorporation or reduction of molecular oxygen; GO:0003674,molecular_function; GO:0005488,binding; GO:0046872,metal ion binding; GO:0043167,ion binding; GO:0043169,cation binding; GO:0046914,transition metal ion binding; GO:0030246,carbohydrate binding; GO:0019842,vit…	2OG-Fe(II) oxygenase superfamily	--	--	--
Cluster-1527.49934	1.21	1.35	0	1.14	0	0.49	94.28	105.44	0	95.38	0	43.08	-0.674366	0.798835	0.988751	2487	K10244 elongation of very long chain fatty acids protein 5 [EC:2.3.1.199] | (RefSeq) hypothetical protein (A)	delta-5 elongase [Pyramimonas cordata]	--	A0A1Q9D3K4_SYMMI SubName: Full=Elongation of very long chain fatty acids protein 7 {ECO:0000313|EMBL:OLP89758.1};	Fatty acyl-CoA elongase/Polyunsaturated fatty acid specific elongation enzyme	GO:0016021,integral component of membrane; GO:0016787,hydrolase activity; GO:0016042,lipid catabolic process; GO:0003674,molecular_function; GO:0003824,catalytic activity; GO:0008152,metabolic process; GO:0006629,lipid metabolic process; GO:0008150,biological_process; GO:0009056,catabolic process; GO:0044238,primary metabolic process; GO:0071704,organic substance metabolic process; GO:1901575,org…	GNS1/SUR4 family	--	--	--
Cluster-1527.62651	1.55	1.43	2.75	1.77	0.96	0.87	85	79	169	104	52	54	-0.674131	0.102019	0.760891	1823	K20870 putative beta-1,4-xylosyltransferase IRX10 [EC:2.4.2.-] | (RefSeq) probable glucuronosyltransferase Os03g0107900 isoform X1 (A)	probable beta-1,4-xylosyltransferase IRX10 [Herrania umbratica]	F8H_ARATH RecName: Full=Probable glucuronoxylan glucuronosyltransferase F8H; EC=2.4.1.-; AltName: Full=FRA8 homolog; AltName: Full=Protein FRAGILE FIBER 8 homolog;	A0A1Q9EUA7_SYMMI SubName: Full=Putative glucuronoxylan glucuronosyltransferase F8H {ECO:0000313|EMBL:OLQ11012.1};	Acetylglucosaminyltransferase EXT1/exostosin 1	GO:0005794,Golgi apparatus; GO:0000139,Golgi membrane; GO:0016021,integral component of membrane; GO:0016757,transferase activity, transferring glycosyl groups; GO:0071555,cell wall organization; GO:0006486,protein glycosylation; GO:0003674,molecular_function; GO:0003824,catalytic activity; GO:0016740,transferase activity; GO:0008150,biological_process; GO:0009987,cellular process; GO:0016043,cel…	Exostosin family	--	--	--
Cluster-1527.74405	9.53	9.3	11.98	7.97	3.96	7.17	507.35	498.99	714.95	456.56	207.33	432.66	-0.673951	0.0200287	0.509435	1778	--	--	--	R1E4N9_EMIHU SubName: Full=Uncharacterized protein {ECO:0000313|EMBL:EOD21785.1, ECO:0000313|EnsemblProtists:EOD21785};	--	GO:0016787,hydrolase activity; GO:0006629,lipid metabolic process; GO:0003674,molecular_function; GO:0003824,catalytic activity; GO:0008152,metabolic process; GO:0008150,biological_process; GO:0044238,primary metabolic process; GO:0071704,organic substance metabolic process	Lipase (class 3)	--	--	--
Cluster-1527.18997	1.08	2.68	3.39	2.05	1.96	0.53	105.93	265.26	372.28	216.08	188.99	58.24	-0.6736	0.206123	0.867462	3079	K06180 23S rRNA pseudouridine1911/1915/1917 synthase [EC:5.4.99.23] | (RefSeq) hypothetical protein (A)	RNA pseudouridylate synthase [Ostreococcus tauri]	PUS2_ARATH RecName: Full=RNA pseudouridine synthase 2, chloroplastic; EC=5.4.99.-; AltName: Full=RNA pseudouridylate synthase 2; AltName: Full=RNA-uridine isomerase 2; Flags: Precursor;	A0A1Q9F2I4_SYMMI SubName: Full=Heat shock protein 75 kDa, mitochondrial {ECO:0000313|EMBL:OLQ13904.1};	RNA pseudouridylate synthases	GO:0009507,chloroplast; GO:0005829,cytosol; GO:0009982,pseudouridine synthase activity; GO:0003723,RNA binding; GO:0000455,enzyme-directed rRNA pseudouridine synthesis; GO:0003674,molecular_function; GO:0003824,catalytic activity; GO:0016853,isomerase activity; GO:0016866,intramolecular transferase activity; GO:0003676,nucleic acid binding; GO:0005488,binding; GO:0097159,organic cyclic compound b…	PPR repeat family	--	--	--
Cluster-1527.84932	0.81	0.45	1.84	1.23	0.4	0.34	27	15	69	44	13	13	-0.672637	0.359363	0.930285	1200	K10967 alpha 1,2-mannosyltransferase [EC:2.4.1.-] | (RefSeq) hypothetical protein (A)	hypothetical protein CHLNCDRAFT_141061 [Chlorella variabilis]	--	B5YLN0_THAPS SubName: Full=Predicted protein {ECO:0000313|EMBL:ACI64260.1};	Glycolipid 2-alpha-mannosyltransferase (alpha-1,2-mannosyltransferase)	GO:0005794,Golgi apparatus; GO:0016021,integral component of membrane; GO:0000026,alpha-1,2-mannosyltransferase activity; GO:0000032,cell wall mannoprotein biosynthetic process; GO:0006487,protein N-linked glycosylation; GO:0000030,mannosyltransferase activity; GO:0003674,molecular_function; GO:0003824,catalytic activity; GO:0016740,transferase activity; GO:0016757,transferase activity, transferr…	Glycolipid 2-alpha-mannosyltransferase	--	--	--
Cluster-1527.38431	11.7	12.34	11.68	10.38	8.06	4.13	283.14	300.32	317.86	270.12	191.69	113.27	-0.672249	0.0326343	0.581932	933	K05309 microsomal prostaglandin-E synthase 2 [EC:5.3.99.3] | (RefSeq) prostaglandin E synthase 2 (A)	prostaglandin E synthase 2 [Durio zibethinus]	--	A0A1Q9CXF0_SYMMI SubName: Full=Prostaglandin E synthase 2 {ECO:0000313|EMBL:OLP87604.1};	Glutathione S-transferase-related protein	GO:0016021,integral component of membrane; GO:0005575,cellular_component; GO:0016020,membrane; GO:0031224,intrinsic component of membrane; GO:0044425,membrane part	Glutathione S-transferase N-terminal domain	--	--	--
Cluster-1527.52857	3.38	3.37	3.69	0.99	2.26	3.11	119.61	120.12	146.41	37.59	78.55	124.49	-0.672081	0.132252	0.798405	1258	K02256 cytochrome c oxidase subunit 1 [EC:7.1.1.9] | (RefSeq) cox1, PhpafMp01; cytochrome c oxidase subunit 1 (A)	cytochrome c oxidase subunit 1 (mitochondrion) [Closterium baillyanum]	COX1_MARPO RecName: Full=Cytochrome c oxidase subunit 1; EC=1.9.3.1; AltName: Full=Cytochrome c oxidase polypeptide I;	B3IWQ9_ALECA RecName: Full=Cytochrome c oxidase subunit 1 {ECO:0000256|RuleBase:RU000369}; EC=1.9.3.1 {ECO:0000256|RuleBase:RU000369}; Flags: Fragment;	Cytochrome c oxidase, subunit I	GO:0016021,integral component of membrane; GO:0005743,mitochondrial inner membrane; GO:0005886,plasma membrane; GO:0045277,respiratory chain complex IV; GO:0004129,cytochrome-c oxidase activity; GO:0020037,heme binding; GO:0005506,iron ion binding; GO:0009060,aerobic respiration; GO:0015990,electron transport coupled proton transport; GO:0006119,oxidative phosphorylation; GO:0009055,electron tran…	Cytochrome C and Quinol oxidase polypeptide I	--	--	--
Cluster-1527.18579	6.34	7.46	5.07	4.92	3.74	3.14	159.62	188.77	143.42	133.12	92.55	89.56	-0.671965	0.0182993	0.492954	961	K17943 pumilio RNA-binding family | (RefSeq) pumilio homolog 5 isoform X1 (A)	hypothetical protein ZOSMA_2G01670 [Zostera marina]	--	A0A1Q9DJX3_SYMMI SubName: Full=Pumilio-like 1 {ECO:0000313|EMBL:OLP95461.1};	--	GO:0003723,RNA binding; GO:0003674,molecular_function; GO:0003676,nucleic acid binding; GO:0005488,binding; GO:0097159,organic cyclic compound binding; GO:1901363,heterocyclic compound binding	Pumilio-family RNA binding repeat	--	--	--
Cluster-1527.51391	2.4	2.48	1.37	2.01	1.6	0.38	178.57	186.12	114.05	160.73	117.3	31.63	-0.671878	0.206515	0.868092	2393	--	--	--	A0A1Q9EFL4_SYMMI SubName: Full=Putative voltage-dependent R-type calcium channel subunit alpha-1E {ECO:0000313|EMBL:OLQ06220.1};	--	GO:0016021,integral component of membrane; GO:0005216,ion channel activity; GO:0003674,molecular_function; GO:0005215,transporter activity; GO:0022857,transmembrane transporter activity; GO:0015075,ion transmembrane transporter activity; GO:0015267,channel activity; GO:0015318,inorganic molecular entity transmembrane transporter activity; GO:0022803,passive transmembrane transporter activity; GO:…	Ion transport protein	--	--	--
Cluster-1527.68569	5.52	9.51	5.17	4.28	3.23	5.03	271.56	471.24	285.22	226.36	156.44	280.44	-0.671497	0.0413105	0.616378	1660	--	--	--	A0A1Q9DHB6_SYMMI SubName: Full=Putative HNH endonuclease {ECO:0000313|EMBL:OLP94500.1};	--	GO:0004519,endonuclease activity; GO:0003674,molecular_function; GO:0003824,catalytic activity; GO:0004518,nuclease activity; GO:0016787,hydrolase activity; GO:0016788,hydrolase activity, acting on ester bonds	NUMOD1 domain	--	--	--
Cluster-1527.41916	16.94	30.12	16.69	14.87	16.92	8.36	879.53	1575.42	971.42	830.21	863.73	491.63	-0.670542	0.0384147	0.605807	1739	--	--	--	A8I1T5_HETTR SubName: Full=Uncharacterized protein {ECO:0000313|EMBL:ABV72548.1};	--	GO:0016021,integral component of membrane; GO:0005575,cellular_component; GO:0016020,membrane; GO:0031224,intrinsic component of membrane; GO:0044425,membrane part	von Willebrand factor type D domain	--	--	--
Cluster-1527.13862	1.99	1.34	1.73	1.34	1.11	0.73	87	59	85	63	48	36	-0.669776	0.0679261	0.699524	1503	K16599 tubulin polyglutamylase TTLL1 [EC:6.-.-.-] | (RefSeq) hypothetical protein (A)	predicted protein, partial [Micromonas pusilla CCMP1545]	--	D0ND50_PHYIT SubName: Full=Tubulin-tyrosine ligase family {ECO:0000313|EMBL:EEY56007.1};	Predicted tubulin-tyrosine ligase	GO:0016874,ligase activity; GO:0018095,protein polyglutamylation; GO:0003674,molecular_function; GO:0003824,catalytic activity; GO:0008152,metabolic process; GO:0006464,cellular protein modification process; GO:0006807,nitrogen compound metabolic process; GO:0008150,biological_process; GO:0009987,cellular process; GO:0018193,peptidyl-amino acid modification; GO:0018200,peptidyl-glutamic acid modi…	Tubulin-tyrosine ligase family	--	--	--
Cluster-1527.72521	6.43	6.23	6.83	4.17	3.64	4.3	63	61	76	44	35	48	-0.669432	0.0457446	0.63105	514	--	--	--	A0A1Q9EKG7_SYMMI SubName: Full=Uncharacterized protein C24H6.11c {ECO:0000313|EMBL:OLQ07922.1};	--	GO:0016021,integral component of membrane; GO:0031207,Sec62/Sec63 complex; GO:0015116,sulfate transmembrane transporter activity; GO:0031204,posttranslational protein targeting to membrane, translocation; GO:0003674,molecular_function; GO:0005215,transporter activity; GO:0022857,transmembrane transporter activity; GO:0008509,anion transmembrane transporter activity; GO:0015075,ion transmembrane t…	Preprotein translocase subunit Sec66	--	--	--
Cluster-1527.3041	0.62	1.09	1.26	1.23	0.37	0.3	35.56	63.34	81.66	76.38	21.13	19.85	-0.669366	0.264564	0.898525	1908	--	--	--	--	--	--	NADH-ubiquinone/plastoquinone oxidoreductase chain 6	--	--	--
Cluster-1527.76842	8.87	9.95	7.41	5.57	7.45	3.47	293	331	275	198	242	130	-0.669221	0.0281602	0.560595	1190	K09602 ubiquitin thioesterase protein OTUB1 [EC:3.4.19.12] | (RefSeq) ubiquitin thioesterase otubain-like (A)	ubiquitin thioesterase otubain-like [Arachis ipaensis]	OTUBL_ARATH RecName: Full=Ubiquitin thioesterase otubain-like; EC=3.4.19.12 {ECO:0000250|UniProtKB:Q96DC9}; AltName: Full=Deubiquitinating enzyme otubain-like; AltName: Full=Ubiquitin-specific-processing protease otubain-like;	A0A1J3ELS9_NOCCA RecName: Full=Ubiquitin thioesterase {ECO:0000256|PIRNR:PIRNR013503}; EC=3.4.19.12 {ECO:0000256|PIRNR:PIRNR013503};	Uncharacterized conserved protein	GO:0005634,nucleus; GO:0019784,NEDD8-specific protease activity; GO:0004843,thiol-dependent ubiquitin-specific protease activity; GO:0043130,ubiquitin binding; GO:0071108,protein K48-linked deubiquitination; GO:0003674,molecular_function; GO:0003824,catalytic activity; GO:0008234,cysteine-type peptidase activity; GO:0008233,peptidase activity; GO:0070011,peptidase activity, acting on L-amino acid…	Peptidase C65 Otubain	--	--	--
Cluster-1527.64468	2.67	2.31	4.67	2.87	2.04	1.19	109	95	214	126	82	55	-0.668658	0.104974	0.767118	1417	--	--	--	--	--	--	MORN repeat	--	--	--
Cluster-1527.8248	47.72	45.22	23.14	41.81	16.61	14.97	38	35	23	36	13	14	-0.668415	0.262775	0.897875	234	--	--	--	--	--	--	--	--	--	--
Cluster-1527.38807	22.05	34.42	15.31	29	7.12	9.78	397.85	623.6	311.36	562.7	126.35	200.37	-0.668154	0.175231	0.842708	754	--	--	--	--	--	--	Zinc finger C-x8-C-x5-C-x3-H type (and similar)	C3H	TF	C3H
Cluster-1527.71431	2.14	2.4	1.85	1.27	1.61	1.13	107.09	121.37	104.13	68.16	79.29	64.32	-0.6681	0.0252578	0.543468	1686	--	--	--	A0A1Q9CNP8_SYMMI SubName: Full=Sperm-associated antigen 1 {ECO:0000313|EMBL:OLP84487.1};	FOG: RCC1 domain	GO:0046872,metal ion binding; GO:0004842,ubiquitin-protein transferase activity; GO:0003674,molecular_function; GO:0005488,binding; GO:0043167,ion binding; GO:0043169,cation binding; GO:0003824,catalytic activity; GO:0016740,transferase activity; GO:0019787,ubiquitin-like protein transferase activity; GO:0140096,catalytic activity, acting on a protein	Mib_herc2	--	--	--
Cluster-1527.30811	4.08	4.23	7.01	4.28	2.54	2.79	326	341	627	368	200	252	-0.667495	0.0254615	0.545018	2553	--	--	--	--	--	--	Domain of unknown function (DUF4116)	--	--	--
Cluster-1527.5387	1.36	0.96	1.93	0.87	0.75	1.03	35	25	56	24	19	30	-0.666509	0.176155	0.84343	979	--	--	--	A3E3Q1_PFIPI SubName: Full=Uncharacterized protein {ECO:0000313|EMBL:ABI14318.1};	--	--	--	--	--	--
Cluster-1527.23180	1.73	2.04	4.58	2.54	1.62	1.11	132	157	392	209	122	96	-0.666274	0.128374	0.793118	2454	--	--	--	--	--	--	Uncharacterized protein conserved in archaea (DUF2096)	--	--	--
Cluster-1527.70697	2.79	2.65	4.55	2.32	1.94	2	110	105	201	98	75	89	-0.666036	0.0360523	0.596787	1374	--	predicted protein, partial [Ostreococcus lucimarinus CCE9901]	GATL9_ARATH RecName: Full=Probable galacturonosyltransferase-like 9; EC=2.4.1.-; AltName: Full=Like glycosyl transferase 8;	A0A1Q9D255_SYMMI SubName: Full=Uncharacterized protein {ECO:0000313|EMBL:OLP89269.1};	--	GO:0005794,Golgi apparatus; GO:0000139,Golgi membrane; GO:0016021,integral component of membrane; GO:0047262,polygalacturonate 4-alpha-galacturonosyltransferase activity; GO:0016757,transferase activity, transferring glycosyl groups; GO:0071555,cell wall organization; GO:0045489,pectin biosynthetic process; GO:0000271,polysaccharide biosynthetic process; GO:0003674,molecular_function; GO:0003824,…	Glycosyl transferase family 8	--	--	--
Cluster-1527.11436	6.28	6.76	2.92	4.84	3.86	1.47	228.73	247.92	119.3	189.83	138.47	60.68	-0.665715	0.154221	0.823698	1289	--	--	--	A0A1Q9EMP9_SYMMI SubName: Full=Nucleolin {ECO:0000313|EMBL:OLQ08702.1};	--	GO:0003723,RNA binding; GO:0003674,molecular_function; GO:0003676,nucleic acid binding; GO:0005488,binding; GO:0097159,organic cyclic compound binding; GO:1901363,heterocyclic compound binding	Haloacid dehalogenase-like hydrolase	--	--	--
Cluster-1527.4887	1.3	0.76	1.57	0.65	0.88	0.73	39	23	53	21	26	25	-0.665594	0.178024	0.844734	1105	--	--	--	--	--	--	--	--	--	--
Cluster-1527.3235	1.89	2.09	1.79	0.72	1.19	1.62	41.17	45.9	43.93	16.94	25.6	40.2	-0.665164	0.171868	0.838286	864	K21804 protein N-lysine methyltransferase METTL21A [EC:2.1.1.-] | (RefSeq) protein-lysine methyltransferase METTL21D (A)	predicted protein [Micromonas commoda]	--	R1FL17_EMIHU SubName: Full=Uncharacterized protein {ECO:0000313|EMBL:EOD34004.1, ECO:0000313|EnsemblProtists:EOD34004};	--	--	Lysine methyltransferase	--	--	--
Cluster-1527.2782	0.8	0.85	1.95	0.75	0.96	0.56	29	31	79	29	34	23	-0.66507	0.211586	0.870662	1278	--	--	--	--	Uncharacterized conserved protein	--	Protein of unknown function (DUF563)	--	--	--
Cluster-1527.4028	3.82	3.39	4.74	3.02	2.26	2.22	308	276	428	262	179	203	-0.66429	0.00304636	0.235923	2575	K11426 [histone H3]-lysine4/36 N-trimethyltransferase SMYD [EC:2.1.1.354 2.1.1.357] | (RefSeq) histone-lysine N-methyltransferase ASHR1 (A)	PREDICTED: histone-lysine N-methyltransferase ASHR1 isoform X2 [Solanum lycopersicum]	--	A0A1Q9EEI1_SYMMI SubName: Full=Crt-like 3 {ECO:0000313|EMBL:OLQ05823.1};	Predicted histone tail methylase containing SET domain	GO:0016021,integral component of membrane; GO:0005575,cellular_component; GO:0016020,membrane; GO:0031224,intrinsic component of membrane; GO:0044425,membrane part	SET domain	SET	TR	SET
Cluster-1527.38216	4.44	4.97	7.49	2.05	3.68	4.7	42.25	47.29	81.1	20.97	34.45	50.99	-0.663895	0.179411	0.846111	506	--	--	--	--	--	--	--	--	--	--
Cluster-1527.52321	17.49	17.27	17.19	12.07	12.09	8.55	109	107.13	123	81.02	74	61	-0.663651	0.0150099	0.460431	410	--	--	--	--	--	--	--	--	--	--
Cluster-1527.59303	3.52	4.5	5.28	3.38	3.39	1.72	34.83	44.58	59.36	36.05	32.96	19.41	-0.66363	0.144813	0.813704	517	--	--	--	A0A1Q9CRN5_SYMMI SubName: Full=Circumsporozoite protein {ECO:0000313|EMBL:OLP85565.1};	--	GO:0016021,integral component of membrane; GO:0005575,cellular_component; GO:0016020,membrane; GO:0031224,intrinsic component of membrane; GO:0044425,membrane part	--	--	--	--
Cluster-1527.45297	23.62	22.89	22.15	16.45	18.68	8.66	97.61	93.71	106.61	73.35	75.81	41.2	-0.663609	0.0579865	0.676946	348	--	--	--	--	--	--	--	--	--	--
Cluster-1527.18234	4.97	4.19	4.4	2.83	4.38	1.38	59.96	50.62	60.03	36.73	51.92	18.89	-0.662319	0.167792	0.834974	580	--	--	--	--	--	--	Glycine zipper	--	--	--
Cluster-1527.25061	4.35	5.68	5.87	3.81	4.56	1.72	172	226	260	162	177	77	-0.662166	0.0669135	0.696155	1378	K22848 diacylglycerol O-acyltransferase 2, plant [EC:2.3.1.20] | (RefSeq) diacylglycerol O-acyltransferase 2 (A)	PREDICTED: diacylglycerol O-acyltransferase 2 [Fragaria vesca subsp. vesca]	DAT2D_SOYBN RecName: Full=Diacylglycerol O-acyltransferase 2D {ECO:0000305}; Short=GmDGAT2D {ECO:0000303|PubMed:27345221}; EC=2.3.1.20 {ECO:0000269|PubMed:27345221};	A0A1Q9EAU8_SYMMI SubName: Full=Acyl-CoA wax alcohol acyltransferase 1 {ECO:0000313|EMBL:OLQ04528.1};	Acyl-CoA:diacylglycerol acyltransferase (DGAT)	GO:0005789,endoplasmic reticulum membrane; GO:0016021,integral component of membrane; GO:0005811,lipid droplet; GO:0004144,diacylglycerol O-acyltransferase activity; GO:0006071,glycerol metabolic process; GO:0019432,triglyceride biosynthetic process; GO:0003674,molecular_function; GO:0003824,catalytic activity; GO:0008374,O-acyltransferase activity; GO:0016411,acylglycerol O-acyltransferase activ…	Diacylglycerol acyltransferase	--	--	--
Cluster-1527.68178	23.18	24.78	20.38	17.65	14.69	10.79	321	344	319	263	200	170	-0.66205	0.00344593	0.251778	632	K03320 ammonium transporter, Amt family | (RefSeq) ammonium transporter (A)	ammonium transporter [Bathycoccus prasinos]	AMT12_ARATH RecName: Full=Ammonium transporter 1 member 2; Short=AtAMT1;2;	A0A0K2STH0_ALETA RecName: Full=Ammonium transporter {ECO:0000256|RuleBase:RU362002};	Ammonia permease	GO:0005887,integral component of plasma membrane; GO:0005886,plasma membrane; GO:0008519,ammonium transmembrane transporter activity; GO:0072488,ammonium transmembrane transport; GO:0015696,ammonium transport; GO:0015843,methylammonium transport; GO:0009624,response to nematode; GO:0003674,molecular_function; GO:0005215,transporter activity; GO:0022857,transmembrane transporter activity; GO:00083…	Phosphate ATP-binding cassette transporter	--	--	--
Cluster-1527.82344	2.17	2.78	5.34	2.76	1.51	2.19	63	81	174	86	43	72	-0.661906	0.133988	0.799548	1072	--	--	--	A0A1Q9DH94_SYMMI SubName: Full=Uncharacterized protein {ECO:0000313|EMBL:OLP94545.1};	--	--	--	--	--	--
Cluster-1527.20029	4.48	2.86	6.72	3.88	3.27	1.76	103	66	174	96	74	46	-0.661761	0.124081	0.788115	898	--	--	--	A0A1Q9CCJ3_SYMMI SubName: Full=Uncharacterized protein {ECO:0000313|EMBL:OLP80641.1};	--	GO:0005634,nucleus; GO:0005622,intracellular; GO:0005575,cellular_component; GO:0005623,cell; GO:0043231,intracellular membrane-bounded organelle; GO:0043226,organelle; GO:0043227,membrane-bounded organelle; GO:0043229,intracellular organelle; GO:0044424,intracellular part; GO:0044464,cell part	Transcription factor S-II (TFIIS), central domain	--	--	--
Cluster-1527.5861	2.9	3.97	4.69	3.07	2.02	2.19	111	153	201	126	76	95	-0.661546	0.0298723	0.56927	1341	K08818 cell division cycle 2-like [EC:2.7.11.22] | (RefSeq) cyclin-dependent kinase G-2-like (A)	Protein kinase PITSLRE [Handroanthus impetiginosus]	CDKG2_ORYSI RecName: Full=Cyclin-dependent kinase G-2; Short=CDKG;2; EC=2.7.11.22; EC=2.7.11.23;	A0A1Q9E2Z0_SYMMI SubName: Full=Cyclin-dependent kinase 10 {ECO:0000313|EMBL:OLQ01763.1};	Protein kinase PITSLRE and related kinases	GO:0005524,ATP binding; GO:0004693,cyclin-dependent protein serine/threonine kinase activity; GO:0008353,RNA polymerase II CTD heptapeptide repeat kinase activity; GO:0000166,nucleotide binding; GO:0003674,molecular_function; GO:0005488,binding; GO:0008144,drug binding; GO:0017076,purine nucleotide binding; GO:0030554,adenyl nucleotide binding; GO:0032553,ribonucleotide binding; GO:0032555,purine…	Protein kinase domain	--	--	--
Cluster-1527.27242	4.44	3.77	4.43	2.79	1.77	3.32	122.94	105.14	137.85	83.1	48.35	104.43	-0.66114	0.0507311	0.650613	1035	--	--	--	A0A1Q9E7U4_SYMMI SubName: Full=Uncharacterized protein {ECO:0000313|EMBL:OLQ03486.1};	--	GO:0016021,integral component of membrane; GO:0005575,cellular_component; GO:0016020,membrane; GO:0031224,intrinsic component of membrane; GO:0044425,membrane part	Zc3h12a-like Ribonuclease NYN domain	--	--	--
Cluster-1527.66039	2.35	3.28	3.42	1.46	2.75	1.47	58.28	81.93	95.68	38.89	67.27	41.5	-0.660522	0.104671	0.766574	952	--	--	--	--	--	--	--	--	--	--
Cluster-1527.50269	16.96	16.31	17.6	8.12	12.08	11.45	1029.04	997.43	1196.43	529.68	720.75	786.97	-0.660289	0.00276277	0.221022	1994	K01053 gluconolactonase [EC:3.1.1.17] | (RefSeq) uncharacterized protein LOC112280515 isoform X1 (A)	gluconolactonase precursor [Monoraphidium neglectum]	--	A0A0D2KVL5_9CHLO SubName: Full=Gluconolactonase {ECO:0000313|EMBL:KIY99423.1};	--	--	SMP-30/Gluconolaconase/LRE-like region	--	--	--
Cluster-1527.22878	51.97	62.88	59.78	41.79	47.71	21.66	188.87	225.94	254.39	163.87	170.21	90.72	-0.66026	0.0327366	0.582148	333	--	--	--	--	--	--	--	--	--	--
Cluster-1527.20522	1.63	1.22	3.55	1.78	1.17	1.09	62	47	152	73	44	47	-0.660067	0.170265	0.837327	1338	K13648 alpha-1,4-galacturonosyltransferase [EC:2.4.1.43] | (RefSeq) galacturonosyltransferase 8 (A)	PREDICTED: probable galacturonosyltransferase-like 4 [Erythranthe guttata]	GATL3_ARATH RecName: Full=Probable galacturonosyltransferase-like 3; EC=2.4.1.-;	A0A1Q9F578_SYMMI SubName: Full=Galacturonosyltransferase 8 {ECO:0000313|EMBL:OLQ14830.1};	--	GO:0005794,Golgi apparatus; GO:0000139,Golgi membrane; GO:0016021,integral component of membrane; GO:0047262,polygalacturonate 4-alpha-galacturonosyltransferase activity; GO:0016757,transferase activity, transferring glycosyl groups; GO:0071555,cell wall organization; GO:0045489,pectin biosynthetic process; GO:0000271,polysaccharide biosynthetic process; GO:0003674,molecular_function; GO:0003824,…	Glycosyl transferase family 8	--	--	--
Cluster-1527.6225	8.22	5.15	8.23	2.27	3.62	7.34	37	23	43	11	16	38	-0.659998	0.290296	0.906675	359	--	--	--	--	--	--	--	--	--	--
Cluster-1527.75912	1.9	3.92	2.4	1.42	2.45	1.32	48.75	101.18	69.08	39.15	61.72	38.4	-0.659882	0.147057	0.815721	975	--	--	--	A0A0M0JZC4_9EUKA RecName: Full=NAD(P)(+)--arginine ADP-ribosyltransferase {ECO:0000256|RuleBase:RU361228}; EC=2.4.2.31 {ECO:0000256|RuleBase:RU361228}; AltName: Full=Mono(ADP-ribosyl)transferase {ECO:0000256|RuleBase:RU361228}; Flags: Fragment;	--	GO:0003956,NAD(P)+-protein-arginine ADP-ribosyltransferase activity; GO:0006471,protein ADP-ribosylation; GO:0003674,molecular_function; GO:0003824,catalytic activity; GO:0016740,transferase activity; GO:0016757,transferase activity, transferring glycosyl groups; GO:0016763,transferase activity, transferring pentosyl groups; GO:0008152,metabolic process; GO:0006464,cellular protein modification p…	NAD:arginine ADP-ribosyltransferase	--	--	--
Cluster-1527.76460	3.64	0	2.18	1.32	0.62	1.65	196.38	0	131.8	76.76	32.77	100.64	-0.659379	0.708758	0.983123	1798	K01076 abhydrolase domain-containing protein 17 [EC:3.1.2.22] | (RefSeq) predicted protein (A)	predicted protein [Micromonas commoda]	--	R1D2D6_EMIHU SubName: Full=Uncharacterized protein {ECO:0000313|EMBL:EOD08790.1, ECO:0000313|EnsemblProtists:EOD08790}; Flags: Fragment;	Predicted alpha/beta hydrolase	GO:0016787,hydrolase activity; GO:0008152,metabolic process; GO:0003674,molecular_function; GO:0003824,catalytic activity; GO:0008150,biological_process	--	--	--	--
Cluster-1527.15040	1.45	1.3	1.55	0.62	0.94	1.11	80	72	96	37	51	69	-0.65932	0.0762821	0.719129	1832	--	--	--	--	--	--	--	--	--	--
Cluster-1527.64984	9.7	10.06	15.16	10.05	5.3	6.7	149	155	263	166	80	117	-0.659242	0.0451624	0.62893	676	--	--	--	--	--	--	--	--	--	--
Cluster-1527.83694	2.57	2.14	2.78	0.93	0.95	2.7	36	30	44	14	13	43	-0.659227	0.280483	0.905533	636	--	--	--	--	--	--	SnoaL-like domain	--	--	--
Cluster-1527.66080	23.63	32.79	21.27	18.59	19.46	11.24	47	64	51	40	38	26	-0.659164	0.105353	0.767645	281	--	--	--	--	--	--	--	--	--	--
Cluster-1527.45128	8.28	8.99	10.89	7.53	7.76	2.58	46.52	50.21	70.44	45.6	42.85	16.62	-0.659133	0.173533	0.841206	392	--	--	--	--	--	--	--	--	--	--
Cluster-1527.69454	1.4	0.8	1.3	0.73	0.63	0.83	54	31	56	30	24	36	-0.658564	0.134083	0.799548	1347	--	--	--	--	--	--	--	--	--	--
Cluster-1527.4481	2.41	1.49	3.84	2.19	1.09	1.6	45	28	81	44	20	34	-0.657853	0.203158	0.8653	773	K03013 DNA-directed RNA polymerases I, II, and III subunit RPABC1 | (RefSeq) DNA-directed RNA polymerases I, II, and III subunit RPABC1 (A)	DNA-directed RNA polymerases I, II, and III subunit RPABC1 [Bathycoccus prasinos]	RPB5A_ARATH RecName: Full=DNA-directed RNA polymerases II and IV subunit 5A; Short=RPB5a; AltName: Full=DNA-directed RNA polymerase II subunit E; AltName: Full=RNA polymerase I, II and III 24.3 kDa subunit; Short=AtRPB24.3;	A0A1Q9DNV5_SYMMI SubName: Full=DNA-directed RNA polymerases I, II, and III subunit RPABC1 {ECO:0000313|EMBL:OLP96842.1};	RNA polymerase, 25-kDa subunit (common to polymerases I, II and III)	GO:0005736,RNA polymerase I complex; GO:0005665,RNA polymerase II, core complex; GO:0005666,RNA polymerase III complex; GO:0000418,RNA polymerase IV complex; GO:0003677,DNA binding; GO:0003899,DNA-directed 5'-3' RNA polymerase activity; GO:0006360,transcription by RNA polymerase I; GO:0006366,transcription by RNA polymerase II; GO:0006383,transcription by RNA polymerase III; GO:0003674,molecular_…	RNA polymerase Rpb5, C-terminal domain	--	--	--
Cluster-1527.27481	123.29	124.64	147.55	76.96	90.9	83.54	145	143	214	98	105	115	-0.657725	0.0120297	0.424284	251	--	--	--	--	--	--	--	--	--	--
Cluster-1527.17144	2.75	3.46	4.35	2.74	2.6	1.38	42	53	75	45	39	24	-0.657661	0.124901	0.789031	673	K03283 heat shock 70kDa protein 1/2/6/8 | (RefSeq) hsp70; heat shock 70 kDa protein-like (A)	PREDICTED: heat shock 70 kDa protein-like [Solanum tuberosum]	MD37C_ARATH RecName: Full=Probable mediator of RNA polymerase II transcription subunit 37c; AltName: Full=Heat shock 70 kDa protein 4; AltName: Full=Heat shock cognate 70 kDa protein 4; AltName: Full=Heat shock cognate protein 70-4; Short=AtHsc70-4; AltName: Full=Heat shock protein 70-4; Short=AtHsp70-4;	A0A1Q9D0K1_SYMMI SubName: Full=Heat shock 70 kDa protein 1B {ECO:0000313|EMBL:OLP88690.1};	Molecular chaperones HSP70/HSC70, HSP70 superfamily	GO:0048046,apoplast; GO:0005618,cell wall; GO:0005829,cytosol; GO:0005794,Golgi apparatus; GO:0005739,mitochondrion; GO:0005634,nucleus; GO:0005886,plasma membrane; GO:0005774,vacuolar membrane; GO:0005524,ATP binding; GO:0031625,ubiquitin protein ligase binding; GO:0016567,protein ubiquitination; GO:0006355,regulation of transcription, DNA-templated; GO:0009617,response to bacterium; GO:0046686,…	Hsp70 protein	--	--	--
Cluster-1527.10144	9.59	8.68	11.26	7.03	5.69	5.87	151	137	200	119	88	105	-0.657171	0.00764703	0.363296	687	K02218 casein kinase 1 [EC:2.7.11.1] | (RefSeq) casein kinase I-like (A)	hypothetical protein CHLNCDRAFT_32696 [Chlorella variabilis]	CKL2_ARATH RecName: Full=Casein kinase 1-like protein 2 {ECO:0000305}; EC=2.7.11.1 {ECO:0000305}; AltName: Full=Protein CASEIN KINASE I-LIKE 2 {ECO:0000303|PubMed:16126836};	A0A1Q9CL90_SYMMI SubName: Full=Casein kinase I {ECO:0000313|EMBL:OLP83691.1};	Casein kinase (serine/threonine/tyrosine protein kinase)	GO:0005737,cytoplasm; GO:0005634,nucleus; GO:0005886,plasma membrane; GO:0005524,ATP binding; GO:0004674,protein serine/threonine kinase activity; GO:0018105,peptidyl-serine phosphorylation; GO:0008360,regulation of cell shape; GO:0000166,nucleotide binding; GO:0003674,molecular_function; GO:0005488,binding; GO:0008144,drug binding; GO:0017076,purine nucleotide binding; GO:0030554,adenyl nucleoti…	Protein kinase domain	--	--	--
Cluster-1527.72414	3.02	3.89	4.87	2.87	2.2	2.36	105	136	190	107	75	93	-0.65705	0.0254944	0.54504	1239	K05535 alpha 1,2-mannosyltransferase [EC:2.4.1.-] | (RefSeq) alpha-1,2-mannosyltransferase MNN21-like (A)	hypothetical protein KFL_010750010 [Klebsormidium nitens]	--	A0A1Q9EHN9_SYMMI SubName: Full=Alpha-1,2-mannosyltransferase MNN2 {ECO:0000313|EMBL:OLQ06929.1};	--	GO:0016021,integral component of membrane; GO:0016757,transferase activity, transferring glycosyl groups; GO:0006486,protein glycosylation; GO:0003674,molecular_function; GO:0003824,catalytic activity; GO:0016740,transferase activity; GO:0008152,metabolic process; GO:0006464,cellular protein modification process; GO:0006807,nitrogen compound metabolic process; GO:0008150,biological_process; GO:00…	Mannosyltransferase putative	--	--	--
Cluster-1527.7980	116.01	133.67	111.61	86.16	73.93	69.31	107	120	128	86	67	75	-0.656837	0.0110185	0.408217	240	--	--	--	--	--	--	--	--	--	--
Cluster-1527.64341	1.03	1.31	1.79	1.11	1.56	0	86.21	110.69	168.22	100.38	128.29	0	-0.656567	0.694567	0.982447	2668	K04424 sterile alpha motif and leucine zipper containing kinase AZK [EC:2.7.11.25] | (RefSeq) serine/threonine protein kinase (A)	uncharacterized protein LOC110821722 [Carica papaya]	CTR1_ARATH RecName: Full=Serine/threonine-protein kinase CTR1 {ECO:0000303|PubMed:8431946}; EC=2.7.11.1 {ECO:0000305}; AltName: Full=Protein CONSTITUTIVE TRIPLE RESPONSE1 {ECO:0000303|PubMed:8431946};	A0A1Q9DKQ9_SYMMI RecName: Full=Alpha-galactosidase {ECO:0000256|RuleBase:RU361168}; EC=3.2.1.22 {ECO:0000256|RuleBase:RU361168}; AltName: Full=Melibiase {ECO:0000256|RuleBase:RU361168};	Tyrosine kinase specific for activated (GTP-bound) p21cdc42Hs	GO:0005789,endoplasmic reticulum membrane; GO:0005524,ATP binding; GO:0004674,protein serine/threonine kinase activity; GO:0004712,protein serine/threonine/tyrosine kinase activity; GO:0004871,NA; GO:0071281,cellular response to iron ion; GO:0009873,ethylene-activated signaling pathway; GO:0009686,gibberellin biosynthetic process; GO:0010105,negative regulation of ethylene-activated signaling pat…	Protein kinase domain	--	--	--
Cluster-1527.9057	2.45	2.66	3.47	2.66	1.69	1.13	121	132	192	141	82	63	-0.655538	0.0625422	0.685354	1663	--	--	--	A0A1Q9DVU5_SYMMI SubName: Full=DEAD-box ATP-dependent RNA helicase 3, chloroplastic {ECO:0000313|EMBL:OLP99294.1};	--	GO:0016021,integral component of membrane; GO:0005524,ATP binding; GO:0004386,helicase activity; GO:0003676,nucleic acid binding; GO:0000166,nucleotide binding; GO:0003674,molecular_function; GO:0005488,binding; GO:0008144,drug binding; GO:0017076,purine nucleotide binding; GO:0030554,adenyl nucleotide binding; GO:0032553,ribonucleotide binding; GO:0032555,purine ribonucleotide binding; GO:003255…	--	--	--	--
Cluster-1527.45296	62.63	68.66	71.7	49.61	46.71	33.19	153	165	209	131	112	94	-0.655236	0.00779577	0.364376	296	--	--	--	--	--	--	--	--	--	--
Cluster-1527.74203	6.34	7.21	4.5	4.96	3.23	3.2	38	43	31	32	19	22	-0.655227	0.159393	0.829003	403	--	--	--	--	--	--	--	--	--	--
Cluster-1527.63892	3.9	2.86	5.71	3.03	1.8	2.99	159.26	117.63	261.84	133.29	72.29	138.56	-0.654458	0.0706157	0.706654	1418	--	hypothetical protein CHLNCDRAFT_57156 [Chlorella variabilis]	--	B7FTP4_PHATC SubName: Full=Predicted protein {ECO:0000313|EMBL:EEC50118.1};	--	GO:0016021,integral component of membrane; GO:0005575,cellular_component; GO:0016020,membrane; GO:0031224,intrinsic component of membrane; GO:0044425,membrane part	EamA-like transporter family	--	--	--
Cluster-1527.74963	6.75	5.72	8.7	4.84	4.12	4.37	210	179	304	162	126	154	-0.654346	0.00824899	0.372485	1134	--	--	--	--	--	--	--	--	--	--
Cluster-1527.74697	69.7	48.8	43.44	52.88	35.46	16.6	50	34	39	41	25	14	-0.654318	0.212596	0.871336	230	--	--	--	--	--	--	--	--	--	--
Cluster-1527.74634	11.17	10.8	11.03	5.79	4.89	9.77	86	83	97	48	37	86	-0.654276	0.0973068	0.753075	453	--	--	--	--	--	--	--	--	--	--
Cluster-1527.29740	2.04	2.11	1.24	0.73	1.63	1.03	174.83	182.22	119.24	67.13	136.92	100.05	-0.654068	0.0990367	0.757165	2720	K12829 splicing factor 3B subunit 2 | (RefSeq) splicing factor 3B subunit 2 (A)	hypothetical protein AXG93_2145s1220 [Marchantia polymorpha subsp. ruderalis]	--	A0A1Q9EFM0_SYMMI SubName: Full=Splicing factor 3B subunit 2 {ECO:0000313|EMBL:OLQ06225.1};	Splicing factor 3b, subunit 2	GO:0005634,nucleus; GO:0005622,intracellular; GO:0005575,cellular_component; GO:0005623,cell; GO:0043231,intracellular membrane-bounded organelle; GO:0043226,organelle; GO:0043227,membrane-bounded organelle; GO:0043229,intracellular organelle; GO:0044424,intracellular part; GO:0044464,cell part	Domain of unknown function (DUF382)	--	--	--
Cluster-1527.65574	0.95	1.12	0.65	0.6	0.52	0.58	67.96	80.12	51.75	45.92	36.64	47.13	-0.653967	0.0841535	0.735111	2299	--	--	--	A0A1Q9F4G3_SYMMI SubName: Full=Voltage-dependent P/Q-type calcium channel subunit alpha-1A {ECO:0000313|EMBL:OLQ14522.1};	--	GO:0016021,integral component of membrane; GO:0005509,calcium ion binding; GO:0005216,ion channel activity; GO:0003674,molecular_function; GO:0005488,binding; GO:0046872,metal ion binding; GO:0043167,ion binding; GO:0043169,cation binding; GO:0005215,transporter activity; GO:0022857,transmembrane transporter activity; GO:0015075,ion transmembrane transporter activity; GO:0015267,channel activity;…	Ion transport protein	--	--	--
Cluster-1527.63881	1.92	1.99	1.3	1.19	0.8	1.27	102.89	107.47	78.37	68.52	42.15	77.21	-0.653479	0.0701524	0.706112	1788	K07375 tubulin beta | (RefSeq) tubulin (A)	Tubulin beta chain [Auxenochlorella protothecoides]	TBBN_GUITH RecName: Full=Tubulin beta chain, nucleomorph; AltName: Full=Nucleomorph beta-tubulin;	A0A1Q9DGL0_SYMMI SubName: Full=Tubulin beta chain {ECO:0000313|EMBL:OLP94318.1};	Beta tubulin	GO:0005874,microtubule; GO:0005525,GTP binding; GO:0003924,GTPase activity; GO:0005200,structural constituent of cytoskeleton; GO:0007017,microtubule-based process; GO:0000166,nucleotide binding; GO:0001882,nucleoside binding; GO:0001883,purine nucleoside binding; GO:0003674,molecular_function; GO:0005488,binding; GO:0017076,purine nucleotide binding; GO:0019001,guanyl nucleotide binding; GO:0032…	Tubulin/FtsZ family, GTPase domain	--	--	--
Cluster-1527.13556	11.36	12.19	8.96	6.44	9.12	5.03	123	132	110	75	97	62	-0.653248	0.0454362	0.630571	544	--	--	--	--	--	--	--	--	--	--
Cluster-1527.21443	1.56	1.91	1.31	0.92	1.07	1.02	129	160	122	82	87	96	-0.652962	0.0231839	0.530994	2640	--	Uncharacterized protein YqkD [Auxenochlorella protothecoides]	--	A0A1Q9E5G5_SYMMI SubName: Full=Acyl-CoA dehydrogenase {ECO:0000313|EMBL:OLQ02667.1};	Predicted alpha/beta hydrolase	GO:0050660,flavin adenine dinucleotide binding; GO:0016627,oxidoreductase activity, acting on the CH-CH group of donors; GO:0009982,pseudouridine synthase activity; GO:0003723,RNA binding; GO:0001522,pseudouridine synthesis; GO:0006396,RNA processing; GO:0000166,nucleotide binding; GO:0003674,molecular_function; GO:0005488,binding; GO:0036094,small molecule binding; GO:0043167,ion binding; GO:004…	Serine aminopeptidase, S33	--	--	--
Cluster-1527.83665	105.3	84.77	71.83	42.99	81.38	42.92	50	39	43	22	38	24	-0.652554	0.160459	0.82978	216	--	--	--	--	--	--	--	--	--	--
Cluster-9013.0	4.05	3.22	4.19	4.21	1.46	1.67	34	27	40	38	12	16	-0.652379	0.24942	0.892777	473	--	--	--	--	--	--	--	--	--	--
Cluster-1527.25062	6.5	6.21	4.57	3.85	3.74	3.31	69	66	55	44	39	40	-0.652222	0.0659679	0.695103	538	--	--	--	--	--	--	--	--	--	--
Cluster-1527.29270	73.86	30.72	75.79	19.41	55.48	38.13	385	159	456	109	284	228	-0.65184	0.158238	0.828105	380	--	hypothetical protein TanjilG_19641 [Lupinus angustifolius]	--	A0A0V0H4B3_SOLCH SubName: Full=Putative ovule protein {ECO:0000313|EMBL:JAP15217.1}; Flags: Fragment;	--	--	--	--	--	--
Cluster-1527.53294	3.8	4.65	3.73	3.09	2.61	2.06	91.94	113.08	101.41	80.21	61.9	56.49	-0.651332	0.0293514	0.566948	932	--	--	--	A0A1Q9D0Z5_SYMMI SubName: Full=Gastricsin {ECO:0000313|EMBL:OLP88838.1};	--	GO:0016021,integral component of membrane; GO:0004190,aspartic-type endopeptidase activity; GO:0003674,molecular_function; GO:0003824,catalytic activity; GO:0004175,endopeptidase activity; GO:0008233,peptidase activity; GO:0070011,peptidase activity, acting on L-amino acid peptides; GO:0016787,hydrolase activity; GO:0070001,aspartic-type peptidase activity; GO:0140096,catalytic activity, acting o…	--	--	--	--
Cluster-1527.13026	6.4	4.57	3.71	4.47	3.17	1.79	50.86	36.18	33.65	38.18	24.71	16.25	-0.651175	0.198212	0.861657	460	--	--	--	A0A1Q9CKW5_SYMMI SubName: Full=Uncharacterized protein {ECO:0000313|EMBL:OLP83559.1};	--	GO:0016021,integral component of membrane; GO:0005575,cellular_component; GO:0016020,membrane; GO:0031224,intrinsic component of membrane; GO:0044425,membrane part	--	--	--	--
Cluster-1527.79679	5.16	4.91	7.67	5.35	2.88	3.07	166	159	277	185	91	112	-0.650456	0.0467025	0.633889	1164	--	hypothetical protein GPECTOR_43g893 [Gonium pectorale]	--	F0Y1U4_AURAN SubName: Full=Uncharacterized protein {ECO:0000313|EMBL:EGB10580.1};	--	GO:0016021,integral component of membrane; GO:0005575,cellular_component; GO:0016020,membrane; GO:0031224,intrinsic component of membrane; GO:0044425,membrane part	--	--	--	--
Cluster-1527.68935	0	2.96	10.9	4.35	0.03	4.32	0	79.19	325.71	124.4	0.89	130.04	-0.650236	0.776295	0.987785	1002	--	--	--	--	--	--	--	--	--	--
Cluster-1527.13230	3.67	3.07	3.76	2.29	1.91	2.41	121	102	139	81	62	90	-0.650091	0.0192874	0.503503	1188	--	--	--	--	--	--	Bacterial type III secretion protein (HrpB1_HrpK)	--	--	--
Cluster-1527.82841	2.03	3.08	1.68	1.57	1.9	0.88	79.47	121.62	73.96	66.28	73.12	38.98	-0.649608	0.118643	0.781088	1368	--	--	--	A0A1Q9CNE3_SYMMI SubName: Full=Uncharacterized protein {ECO:0000313|EMBL:OLP84436.1};	--	--	zinc-finger of acetyl-transferase ESCO	--	--	--
Cluster-1527.17205	5.69	2.69	4.06	1.74	2.45	3.52	126.79	60.32	101.74	41.75	53.61	88.87	-0.649364	0.144734	0.813704	877	--	--	--	--	--	--	--	--	--	--
Cluster-1527.18284	0.31	0.37	0	0.1	0.11	0.21	45.45	55.21	0	15.29	15.87	35.55	-0.649242	0.570136	0.973094	4561	K24738 WD repeat-containing protein 7 | (RefSeq) uncharacterized protein LOC111368457 (A)	hypothetical protein MIMGU_mgv1a000176mg [Erythranthe guttata]	PR19B_ARATH RecName: Full=Pre-mRNA-processing factor 19 homolog 2 {ECO:0000305}; EC=2.3.2.27 {ECO:0000269|PubMed:18393940}; AltName: Full=MOS4-associated complex protein 3B; Short=MAC protein 3B; AltName: Full=Plant U-box protein 60; AltName: Full=RING-type E3 ubiquitin transferase PRP19 2 {ECO:0000305}; AltName: Full=U-box domain-containing protein 60;	W2QL90_PHYPN SubName: Full=Uncharacterized protein {ECO:0000313|EMBL:ETN13686.1};	FOG: WD40 repeat	GO:0005618,cell wall; GO:0009507,chloroplast; GO:0080008,Cul4-RING E3 ubiquitin ligase complex; GO:0005634,nucleus; GO:0000974,Prp19 complex; GO:0071006,U2-type catalytic step 1 spliceosome; GO:0061630,ubiquitin protein ligase activity; GO:0004842,ubiquitin-protein transferase activity; GO:0042742,defense response to bacterium; GO:0006281,DNA repair; GO:0000349,generation of catalytic spliceosome…	Anaphase-promoting complex subunit 4 WD40 domain	--	--	--
Cluster-1527.58503	4.96	4.41	5.65	3.53	3.63	2.4	339.49	304.24	432.61	259.34	244.36	185.86	-0.648521	0.00364903	0.258499	2218	K04648 dynactin 1 | (RefSeq) dynactin, 150 kDa isoform-like (A)	Serine/threonine protein kinase [Klebsormidium nitens]	--	A0A1Q9EQB5_SYMMI SubName: Full=CAP-Gly domain-containing linker protein 1 {ECO:0000313|EMBL:OLQ09567.1};	Cytoskeleton-associated protein and related proteins	GO:0005623,cell; GO:0016021,integral component of membrane; GO:0005509,calcium ion binding; GO:0019239,deaminase activity; GO:0045454,cell redox homeostasis; GO:0009168,purine ribonucleoside monophosphate biosynthetic process; GO:0003674,molecular_function; GO:0005488,binding; GO:0046872,metal ion binding; GO:0043167,ion binding; GO:0043169,cation binding; GO:0003824,catalytic activity; GO:001678…	CAP-Gly domain	--	--	--
Cluster-1527.23825	1.52	1.71	3.31	1.7	1.14	1.32	58.66	66.73	143.84	70.91	43.44	57.81	-0.648166	0.120456	0.784059	1355	--	--	FCPF_PHATR RecName: Full=Fucoxanthin-chlorophyll a-c binding protein F, chloroplastic; Flags: Precursor;	A0A1Q9C8A0_SYMMI SubName: Full=Caroteno-chlorophyll a-c-binding protein {ECO:0000313|EMBL:OLP79140.1};	--	GO:0009535,chloroplast thylakoid membrane; GO:0016021,integral component of membrane; GO:0030076,light-harvesting complex; GO:0009523,photosystem II; GO:0016168,chlorophyll binding; GO:0009765,photosynthesis, light harvesting; GO:0018298,protein-chromophore linkage; GO:0003674,molecular_function; GO:0005488,binding; GO:0043167,ion binding; GO:0043168,anion binding; GO:0046906,tetrapyrrole binding…	Chlorophyll A-B binding protein	--	--	--
Cluster-1527.29707	2.85	5	4.05	2.96	2.57	2.04	97.67	172.54	155.92	109.1	86.57	79.5	-0.647344	0.0397412	0.610921	1227	K15281 solute carrier family 35 | (RefSeq) DMT family transporter: nucleotide-sugar (A)	Drug/Metabolite transporter superfamily [Micromonas commoda]	GFT1_ARATH RecName: Full=GDP-fucose transporter 1 {ECO:0000303|PubMed:27381418}; AltName: Full=GDP-mannose transporter GONST4 {ECO:0000303|PubMed:15480787}; AltName: Full=Protein GOLGI NUCLEOTIDE SUGAR TRANSPORTER 4 {ECO:0000303|PubMed:15480787};	A0A1Q9E247_SYMMI SubName: Full=GDP-mannose transporter GONST4 {ECO:0000313|EMBL:OLQ01490.1};	Nucleotide-sugar transporter VRG4/SQV-7	GO:0005794,Golgi apparatus; GO:0000139,Golgi membrane; GO:0016021,integral component of membrane; GO:0015297,antiporter activity; GO:0005457,GDP-fucose transmembrane transporter activity; GO:0008643,carbohydrate transport; GO:0015780,nucleotide-sugar transmembrane transport; GO:0003674,molecular_function; GO:0005215,transporter activity; GO:0022857,transmembrane transporter activity; GO:0015291,s…	Triose-phosphate Transporter family	--	--	--
Cluster-1527.59849	16.69	14.03	9.96	8.96	10.4	6.52	328.71	277.49	220.95	189.82	201.35	145.84	-0.646514	0.0237643	0.533847	802	--	--	--	--	--	--	--	--	--	--
Cluster-1527.39501	4.42	5.6	4.29	3.22	2.88	2.98	510.21	652.7	554.59	399.84	326.76	389.05	-0.645912	0.000760626	0.10419	3589	--	--	--	A0A1Q9D0I4_SYMMI SubName: Full=Putative metabolite transport protein CsbC {ECO:0000313|EMBL:OLP88686.1};	--	GO:0016021,integral component of membrane; GO:0004553,hydrolase activity, hydrolyzing O-glycosyl compounds; GO:0022857,transmembrane transporter activity; GO:0005975,carbohydrate metabolic process; GO:0003674,molecular_function; GO:0003824,catalytic activity; GO:0016787,hydrolase activity; GO:0016798,hydrolase activity, acting on glycosyl bonds; GO:0005215,transporter activity; GO:0008152,metabol…	PAN domain	--	--	--
Cluster-1527.81257	10.38	10.79	11.55	6.94	8.22	5.75	36	37	47	26	28	23	-0.645278	0.125157	0.789633	328	--	--	--	A0A1Q9BYX4_SYMMI SubName: Full=Small glutamine-rich tetratricopeptide repeat-containing protein beta {ECO:0000313|EMBL:OLP75871.1};	--	GO:0016021,integral component of membrane; GO:0005575,cellular_component; GO:0016020,membrane; GO:0031224,intrinsic component of membrane; GO:0044425,membrane part	--	--	--	--
Cluster-1527.77155	2.44	4.33	2.13	2.33	2.21	1.18	70.57	125.96	69.24	72.43	62.97	38.78	-0.644514	0.134052	0.799548	1071	--	--	--	--	--	--	PAN domain	--	--	--
Cluster-1527.74910	1.35	1.45	1.66	0.94	1.08	0.82	51	55	70	38	40	35	-0.644099	0.0711409	0.706704	1324	--	--	--	--	--	--	Ankyrin repeats (3 copies)	--	--	--
Cluster-1527.48534	12.17	9.46	9.84	5.17	8.67	6.12	91.64	71.03	84.68	41.95	64.16	52.63	-0.643296	0.0711757	0.706704	448	--	--	--	--	--	--	--	--	--	--
Cluster-1527.12454	0.71	0.97	1.9	1.1	0.76	0.44	106	146	319	177	112	75	-0.642977	0.149297	0.818201	4587	K07204 regulatory associated protein of mTOR | (GenBank) regulatory-associated protein of TOR protein (A)	hypothetical protein AXG93_4689s1450 [Marchantia polymorpha subsp. ruderalis]	RTOR2_ORYSJ RecName: Full=Regulatory-associated protein of TOR 2; AltName: Full=Protein RAPTOR 2; Short=OsRAPTOR2;	A0A176WKI0_MARPO SubName: Full=Uncharacterized protein {ECO:0000313|EMBL:OAE33658.1};	Guanine nucleotide binding protein MIP1	GO:0005737,cytoplasm; GO:0031931,TORC1 complex; GO:0030674,protein binding, bridging; GO:0071230,cellular response to amino acid stimulus; GO:0009267,cellular response to starvation; GO:0030307,positive regulation of cell growth; GO:0071902,positive regulation of protein serine/threonine kinase activity; GO:0010506,regulation of autophagy; GO:0008361,regulation of cell size; GO:0031929,TOR signal…	Raptor N-terminal CASPase like domain	--	--	--
Cluster-1527.29365	57.95	64.83	45.84	59.28	38.97	12.35	56	61	55	62	37	14	-0.642894	0.236297	0.88483	242	--	--	--	--	--	--	--	--	--	--
Cluster-1527.9472	1.36	1.95	1.47	2.55	0	0.59	90.25	130.02	108.86	181.29	0	44.52	-0.642453	0.706661	0.9831	2156	K17579 protein phosphatase 1 regulatory subunit 42 | (RefSeq) hypothetical protein (A)	RNA-binding protein [Chlamydomonas reinhardtii]	--	A0A1Q9D919_SYMMI SubName: Full=Protein MEI2-like 2 {ECO:0000313|EMBL:OLP91661.1};	--	GO:0046872,metal ion binding; GO:0003723,RNA binding; GO:0003674,molecular_function; GO:0005488,binding; GO:0043167,ion binding; GO:0043169,cation binding; GO:0003676,nucleic acid binding; GO:0097159,organic cyclic compound binding; GO:1901363,heterocyclic compound binding	Zinc finger C-x8-C-x5-C-x3-H type (and similar)	C3H	TF	C3H
Cluster-1527.12322	1.68	1.56	4.1	2.33	1.26	1.11	116.29	108.81	317.98	173.66	85.93	87.25	-0.642143	0.158402	0.828106	2242	--	--	--	--	--	--	Phosphotransferase enzyme family	--	--	--
[truncated: 57,354 more rows]

## Sheet: 1_16P vs 1P
ID	1/16P-1_fpkm	1/16P-2_fpkm	1/16P-3_fpkm	1P-1_fpkm	1P-2_fpkm	1P-3_fpkm	1/16P-1_count	1/16P-2_count	1/16P-3_count	1P-1_count	1P-2_count	1P-3_count	log2FoldChange	pvalue	padj	length	KEGG	Nr	Swissprot	TrEMBL	KOG	GO	Pfam	TF-Family	TF-Category	TF-Classification
[truncated: 59,565 more rows]
